# Supplementary material for: Pathological mechanisms of type 1 diabetes in children: investigation of the exosomal protein expression profile
Source: Front Endocrinol (Lausanne). 2023 Oct 11;14:1271929. doi: 10.3389/fendo.2023.1271929 (PMC10599151; doi:10.3389/fendo.2023.1271929)
Supplement: Supplementary file 6 [file Table_1.xlsx]

## Sheet: Sheet1
Table S1. Quantitative results of TMT6 in plasma exosomes of T1D children.
Accession	CON-1	T1D-1	INT-1	CON-2	T1D-2	INT-2	Ratio CON-1	Ratio T1D-1	Ratio INT-1	Ratio CON-2	Ratio T1D-2	Ratio INT-2	Description
sp|P04114|APOB_HUMAN	5860000000	9930000000	7690000000	10800000000	14900000000	7360000000		1.7	1.31	1.84	2.55	1.26	Apolipoprotein B-100 OS=Homo sapiens OX=9606 GN=APOB PE=1 SV=2
sp|P02751|FINC_HUMAN	7720000000	8180000000	7500000000	7980000000	7990000000	9780000000	1	1.06	0.97	1.03	1.04	1.27	Fibronectin OS=Homo sapiens OX=9606 GN=FN1 PE=1 SV=5
sp|P02768|ALBU_HUMAN	183000000000	146000000000	175000000000	175000000000	116000000000	128000000000	1	0.79	0.95	0.96	0.63	0.7	Albumin OS=Homo sapiens OX=9606 GN=ALB PE=1 SV=2
sp|P01024|CO3_HUMAN	4840000000	6340000000	5720000000	6260000000	5030000000	7870000000	1	1.31	1.18	1.29	1.04	1.63	Complement C3 OS=Homo sapiens OX=9606 GN=C3 PE=1 SV=2
sp|P08603|CFAH_HUMAN	488000000	665000000	473000000	813000000	567000000	777000000	1	1.36	0.97	1.67	1.16	1.59	Complement factor H OS=Homo sapiens OX=9606 GN=CFH PE=1 SV=4
sp|P02671|FIBA_HUMAN	53100000000	64000000000	56400000000	46600000000	86100000000	74400000000	1	1.21	1.06	0.88	1.62	1.4	Fibrinogen alpha chain OS=Homo sapiens OX=9606 GN=FGA PE=1 SV=2
sp|P02787|TRFE_HUMAN	7070000000	5740000000	7600000000	8190000000	4860000000	5490000000	1	0.81	1.07	1.16	0.69	0.78	Serotransferrin OS=Homo sapiens OX=9606 GN=TF PE=1 SV=3
sp|P02675|FIBB_HUMAN	40300000000	51200000000	44000000000	36600000000	58600000000	60600000000	1	1.27	1.09	0.91	1.45	1.51	Fibrinogen beta chain OS=Homo sapiens OX=9606 GN=FGB PE=1 SV=2
sp|P00747|PLMN_HUMAN	3500000000	4950000000	3680000000	5120000000	5720000000	4930000000	1	1.42	1.05	1.46	1.63	1.41	Plasminogen OS=Homo sapiens OX=9606 GN=PLG PE=1 SV=2
sp|P04275|VWF_HUMAN	313000000	312000000	347000000	351000000	927000000	547000000	1	0.99	1.11	1.12	2.96	1.75	von Willebrand factor OS=Homo sapiens OX=9606 GN=VWF PE=1 SV=4
sp|P01023|A2MG_HUMAN	4910000000	3310000000	4720000000	3680000000	3250000000	4020000000	1	0.67	0.96	0.75	0.66	0.82	Alpha-2-macroglobulin OS=Homo sapiens OX=9606 GN=A2M PE=1 SV=3
sp|P0C0L4|CO4A_HUMAN	108000	218000	165000	295000	327000	242000	1	2.02	1.53	2.74	3.04	2.24	Complement C4-A OS=Homo sapiens OX=9606 GN=C4A PE=1 SV=2
sp|P01031|CO5_HUMAN	621000000	1070000000	835000000	786000000	934000000	1200000000	1	1.73	1.34	1.26	1.5	1.94	Complement C5 OS=Homo sapiens OX=9606 GN=C5 PE=1 SV=4
C9JEU5|C9JEU5_HUMAN	1480000	2070000	2200000	1700000	1720000	1800000	1	1.4	1.49	1.15	1.16	1.22	Fibrinogen gamma chain OS=Homo sapiens OX=9606 GN=FGG PE=1 SV=1
sp|P00734|THRB_HUMAN	358000000	366000000	381000000	289000000	376000000	343000000	1	1.02	1.06	0.81	1.05	0.96	Prothrombin OS=Homo sapiens OX=9606 GN=F2 PE=1 SV=2
sp|P08519|APOA_HUMAN	107000000	248000000	253000000	346000000	255000000	197000000	1	2.31	2.36	3.22	2.38	1.83	Apolipoprotein(a) OS=Homo sapiens OX=9606 GN=LPA PE=1 SV=1
sp|P00450|CERU_HUMAN	338000000	322000000	355000000	238000000	221000000	258000000	1	0.95	1.05	0.7	0.65	0.77	Ceruloplasmin OS=Homo sapiens OX=9606 GN=CP PE=1 SV=1
sp|P01871|IGHM_HUMAN	8160000000	9580000000	6520000000	9980000000	10300000000	9890000000	1	1.17	0.8	1.22	1.27	1.21	Immunoglobulin heavy constant mu OS=Homo sapiens OX=9606 GN=IGHM PE=1 SV=4
B4E1Z4|B4E1Z4_HUMAN	98500000	114000000	114000000	77600000	99200000	96500000	1	1.16	1.15	0.79	1.01	0.98	C3/C5 convertase OS=Homo sapiens OX=9606 PE=1 SV=1
sp|P05160|F13B_HUMAN	377000000	393000000	320000000	409000000	342000000	413000000	1	1.04	0.85	1.08	0.91	1.1	Coagulation factor XIII B chain OS=Homo sapiens OX=9606 GN=F13B PE=1 SV=3
sp|P35908|K22E_HUMAN	164000000	242000000	164000000	146000000	315000000	228000000	1	1.48	1	0.89	1.92	1.39	Keratin type II cytoskeletal 2 epidermal OS=Homo sapiens OX=9606 GN=KRT2 PE=1 SV=2
sp|P01042|KNG1_HUMAN	505000000	559000000	528000000	518000000	579000000	521000000	1	1.11	1.04	1.03	1.15	1.03	Kininogen-1 OS=Homo sapiens OX=9606 GN=KNG1 PE=1 SV=2
A0A0D9SG88|A0A0D9SG88_HUMAN	333000	575000	383000	374000	490000	510000	1	1.73	1.15	1.12	1.47	1.53	Complement factor H OS=Homo sapiens OX=9606 GN=CFH PE=1 SV=1
sp|P04003|C4BPA_HUMAN	6500000000	9150000000	6700000000	10300000000	10800000000	10400000000	1	1.41	1.03	1.58	1.66	1.6	C4b-binding protein alpha chain OS=Homo sapiens OX=9606 GN=C4BPA PE=1 SV=2
sp|P02647|APOA1_HUMAN	5930000000	4860000000	6050000000	6340000000	4870000000	5190000000	1	0.82	1.02	1.07	0.82	0.88	Apolipoprotein A-I OS=Homo sapiens OX=9606 GN=APOA1 PE=1 SV=1
sp|P02649|APOE_HUMAN	974000000	737000000	579000000	1240000000	714000000	625000000	1	0.76	0.59	1.27	0.73	0.64	Apolipoprotein E OS=Homo sapiens OX=9606 GN=APOE PE=1 SV=1
sp|P02774|VTDB_HUMAN	1710000000	1770000000	1770000000	1620000000	1230000000	1290000000	1	1.03	1.03	0.94	0.72	0.75	Vitamin D-binding protein OS=Homo sapiens OX=9606 GN=GC PE=1 SV=2
D6RF35|D6RF35_HUMAN	1710000000	1770000000	1770000000	1620000000	1230000000	1290000000	1	1.03	1.03	0.94	0.72	0.75	Gc-globulin OS=Homo sapiens OX=9606 GN=GC PE=1 SV=1
A0A1B0GVI3|A0A1B0GVI3_HUMAN	212000000	443000000	225000000	242000000	552000000	454000000	1	2.09	1.06	1.14	2.6	2.14	Keratin type I cytoskeletal 10 OS=Homo sapiens OX=9606 GN=KRT10 PE=1 SV=2
sp|P13645|K1C10_HUMAN	212000000	443000000	225000000	242000000	552000000	454000000	1	2.09	1.06	1.14	2.6	2.14	Keratin type I cytoskeletal 10 OS=Homo sapiens OX=9606 GN=KRT10 PE=1 SV=6
sp|P04264|K2C1_HUMAN	303000000	611000000	278000000	352000000	631000000	564000000	1	2.01	0.92	1.16	2.08	1.86	Keratin type II cytoskeletal 1 OS=Homo sapiens OX=9606 GN=KRT1 PE=1 SV=6
sp|P00738|HPT_HUMAN	331000000	622000000	366000000	329000000	424000000	412000000	1	1.88	1.11	0.99	1.28	1.24	Haptoglobin OS=Homo sapiens OX=9606 GN=HP PE=1 SV=1
sp|P01008|ANT3_HUMAN	684000000	661000000	700000000	656000000	682000000	642000000	1	0.97	1.02	0.96	1	0.94	Antithrombin-III OS=Homo sapiens OX=9606 GN=SERPINC1 PE=1 SV=1
Q5T985|Q5T985_HUMAN	713000000	515000000	647000000	461000000	362000000	564000000	1	0.72	0.91	0.65	0.51	0.79	Inter-alpha-trypsin inhibitor heavy chain H2 OS=Homo sapiens OX=9606 GN=ITIH2 PE=1 SV=1
sp|P19823|ITIH2_HUMAN	713000000	515000000	647000000	461000000	362000000	564000000	1	0.72	0.91	0.65	0.51	0.79	Inter-alpha-trypsin inhibitor heavy chain H2 OS=Homo sapiens OX=9606 GN=ITIH2 PE=1 SV=2
A0A4W9A917|A0A4W9A917_HUMAN	857000000	668000000	530000000	638000000	586000000	628000000	1	0.78	0.62	0.74	0.68	0.73	Immunoglobulin heavy constant gamma 3 (Fragment) OS=Homo sapiens OX=9606 GN=IGHG3 PE=1 SV=1
sp|P01860|IGHG3_HUMAN	857000000	668000000	530000000	638000000	586000000	628000000	1	0.78	0.62	0.74	0.68	0.73	Immunoglobulin heavy constant gamma 3 OS=Homo sapiens OX=9606 GN=IGHG3 PE=1 SV=2
sp|P01857|IGHG1_HUMAN	1550000000	3360000000	1670000000	1640000000	1280000000	1990000000	1	2.17	1.08	1.06	0.83	1.29	Immunoglobulin heavy constant gamma 1 OS=Homo sapiens OX=9606 GN=IGHG1 PE=1 SV=1
sp|P06727|APOA4_HUMAN	782000000	901000000	839000000	698000000	652000000	752000000	1	1.15	1.07	0.89	0.83	0.96	Apolipoprotein A-IV OS=Homo sapiens OX=9606 GN=APOA4 PE=1 SV=4
sp|P13671|CO6_HUMAN	105000000	134000000	115000000	152000000	136000000	138000000	1	1.27	1.09	1.45	1.29	1.31	Complement component C6 OS=Homo sapiens OX=9606 GN=C6 PE=1 SV=3
sp|P03952|KLKB1_HUMAN	78600000	83600000	79000000	84800000	86200000	72100000	1	1.06	1	1.08	1.1	0.92	Plasma kallikrein OS=Homo sapiens OX=9606 GN=KLKB1 PE=1 SV=1
H0YAC1|H0YAC1_HUMAN	78600000	83600000	79000000	84800000	86200000	72100000	1	1.06	1	1.08	1.1	0.92	Plasma kallikrein (Fragment) OS=Homo sapiens OX=9606 GN=KLKB1 PE=1 SV=1
sp|P00488|F13A_HUMAN	116000000	93500000	117000000	102000000	111000000	153000000	1	0.81	1.01	0.88	0.96	1.32	Coagulation factor XIII A chain OS=Homo sapiens OX=9606 GN=F13A1 PE=1 SV=4
sp|P02790|HEMO_HUMAN	646000000	544000000	686000000	632000000	523000000	528000000	1	0.84	1.06	0.98	0.81	0.82	Hemopexin OS=Homo sapiens OX=9606 GN=HPX PE=1 SV=2
sp|P10643|CO7_HUMAN	76500000	93400000	76700000	72000000	98500000	91800000	1	1.22	1	0.94	1.29	1.2	Complement component C7 OS=Homo sapiens OX=9606 GN=C7 PE=1 SV=2
sp|Q16610|ECM1_HUMAN	72100000	76600000	79200000	106000000	87300000	87700000	1	1.06	1.1	1.47	1.21	1.22	Extracellular matrix protein 1 OS=Homo sapiens OX=9606 GN=ECM1 PE=1 SV=2
sp|P00736|C1R_HUMAN	228000000	218000000	213000000	204000000	213000000	206000000	1	0.96	0.93	0.9	0.93	0.9	Complement C1r subcomponent OS=Homo sapiens OX=9606 GN=C1R PE=1 SV=2
A0A3B3ISR2|A0A3B3ISR2_HUMAN	228000000	218000000	213000000	204000000	213000000	206000000	1	0.96	0.93	0.9	0.93	0.9	Complement subcomponent C1r OS=Homo sapiens OX=9606 GN=C1R PE=1 SV=1
B4DPQ0|B4DPQ0_HUMAN	228000000	218000000	213000000	204000000	213000000	206000000	1	0.96	0.93	0.9	0.93	0.9	Complement subcomponent C1r OS=Homo sapiens OX=9606 GN=C1R PE=1 SV=1
sp|P20930|FILA_HUMAN	204000000	110000000	332000000	135000000	31100000	29300000	1	0.54	1.62	0.66	0.15	0.14	Filaggrin OS=Homo sapiens OX=9606 GN=FLG PE=1 SV=3
A0A3B3ISJ1|A0A3B3ISJ1_HUMAN	825000000	1110000000	839000000	954000000	1330000000	1140000000	1	1.35	1.02	1.16	1.61	1.38	Vitamin K-dependent protein S OS=Homo sapiens OX=9606 GN=PROS1 PE=1 SV=1
sp|P07225|PROS_HUMAN	825000000	1110000000	839000000	954000000	1330000000	1140000000	1	1.35	1.02	1.16	1.61	1.38	Vitamin K-dependent protein S OS=Homo sapiens OX=9606 GN=PROS1 PE=1 SV=1
A0A0S2Z4L3|A0A0S2Z4L3_HUMAN	825000000	1110000000	839000000	954000000	1330000000	1140000000	1	1.35	1.02	1.16	1.61	1.38	Vitamin K-dependent protein S (Fragment) OS=Homo sapiens OX=9606 GN=PROS1 PE=1 SV=1
sp|P02533|K1C14_HUMAN	4530000	7740000	3950000	4820000	6070000	6320000	1	1.71	0.87	1.06	1.34	1.4	Keratin type I cytoskeletal 14 OS=Homo sapiens OX=9606 GN=KRT14 PE=1 SV=4
sp|P01859|IGHG2_HUMAN	223000000	221000000	256000000	196000000	208000000	262000000	1	0.99	1.15	0.88	0.93	1.17	Immunoglobulin heavy constant gamma 2 OS=Homo sapiens OX=9606 GN=IGHG2 PE=1 SV=2
sp|P01009|A1AT_HUMAN	3790000000	4510000000	4270000000	3910000000	2930000000	3290000000	1	1.19	1.13	1.03	0.77	0.87	Alpha-1-antitrypsin OS=Homo sapiens OX=9606 GN=SERPINA1 PE=1 SV=3
sp|Q9Y490|TLN1_HUMAN	32700000	28100000	15000000	12100000	16400000	23900000	1	0.86	0.46	0.37	0.5	0.73	Talin-1 OS=Homo sapiens OX=9606 GN=TLN1 PE=1 SV=3
sp|P01834|IGKC_HUMAN	697000000	1230000000	857000000	1430000000	1140000000	1560000000	1	1.76	1.23	2.05	1.63	2.24	Immunoglobulin kappa constant OS=Homo sapiens OX=9606 GN=IGKC PE=1 SV=2
A0A5H1ZRQ3|A0A5H1ZRQ3_HUMAN	697000000	1230000000	857000000	1430000000	1140000000	1560000000	1	1.76	1.23	2.05	1.63	2.24	Immunoglobulin kappa constant (Fragment) OS=Homo sapiens OX=9606 GN=IGKC PE=1 SV=1
C9JPQ9|C9JPQ9_HUMAN	536000000	1490000000	701000000	825000000	1470000000	1330000000	1	2.78	1.31	1.54	2.75	2.48	Fibrinogen gamma chain (Fragment) OS=Homo sapiens OX=9606 GN=FGG PE=1 SV=1
C9JU00|C9JU00_HUMAN	536000000	1490000000	701000000	825000000	1470000000	1330000000	1	2.78	1.31	1.54	2.75	2.48	Fibrinogen gamma chain (Fragment) OS=Homo sapiens OX=9606 GN=FGG PE=1 SV=1
sp|O75882|ATRN_HUMAN	56500000	54100000	55800000	49200000	50400000	46700000	1	0.96	0.99	0.87	0.89	0.83	Attractin OS=Homo sapiens OX=9606 GN=ATRN PE=1 SV=2
sp|P07996|TSP1_HUMAN	48400000	60600000	64400000	43700000	33700000	49500000	1	1.25	1.33	0.9	0.7	1.02	Thrombospondin-1 OS=Homo sapiens OX=9606 GN=THBS1 PE=1 SV=2
A0A3B3ISX9|A0A3B3ISX9_HUMAN	64400000	31400000	53000000	27500000	15400000	14100000	1	0.49	0.82	0.43	0.24	0.22	Tenascin-X OS=Homo sapiens OX=9606 GN=TNXB PE=1 SV=1
sp|P26927|HGFL_HUMAN	63200000	90100000	60000000	71900000	56800000	59700000	1	1.43	0.95	1.14	0.9	0.94	Hepatocyte growth factor-like protein OS=Homo sapiens OX=9606 GN=MST1 PE=1 SV=2
G3XAK1|G3XAK1_HUMAN	63200000	90100000	60000000	71900000	56800000	59700000	1	1.43	0.95	1.14	0.9	0.94	Hepatocyte growth factor-like protein OS=Homo sapiens OX=9606 GN=MST1 PE=1 SV=1
sp|P25311|ZA2G_HUMAN	85400000	81300000	85700000	73600000	120000000	80500000	1	0.95	1	0.86	1.41	0.94	Zinc-alpha-2-glycoprotein OS=Homo sapiens OX=9606 GN=AZGP1 PE=1 SV=2
E9PEV4|E9PEV4_HUMAN	259000	343000	247000	352000	274000	251000	1	1.33	0.96	1.36	1.06	0.97	Apolipoprotein E (Fragment) OS=Homo sapiens OX=9606 GN=APOE PE=1 SV=1
sp|Q03591|FHR1_HUMAN	18800000	15100000	18800000	24400000	18700000	16500000	1	0.8	1	1.3	0.99	0.88	Complement factor H-related protein 1 OS=Homo sapiens OX=9606 GN=CFHR1 PE=1 SV=2
sp|P35527|K1C9_HUMAN	332000000	589000000	307000000	317000000	539000000	557000000	1	1.78	0.92	0.96	1.62	1.68	Keratin type I cytoskeletal 9 OS=Homo sapiens OX=9606 GN=KRT9 PE=1 SV=3
sp|P43652|AFAM_HUMAN	240000000	218000000	244000000	276000000	185000000	203000000	1	0.91	1.02	1.15	0.77	0.84	Afamin OS=Homo sapiens OX=9606 GN=AFM PE=1 SV=1
sp|P06396|GELS_HUMAN	102000000	84200000	106000000	98500000	82700000	108000000	1	0.83	1.04	0.97	0.81	1.06	Gelsolin OS=Homo sapiens OX=9606 GN=GSN PE=1 SV=1
sp|P13647|K2C5_HUMAN	18500000	36600000	18500000	20500000	33100000	32200000	1	1.98	1	1.11	1.79	1.74	Keratin type II cytoskeletal 5 OS=Homo sapiens OX=9606 GN=KRT5 PE=1 SV=3
F5GY80|F5GY80_HUMAN	37600000	46800000	40800000	35800000	47900000	43800000	1	1.25	1.09	0.95	1.27	1.17	Complement component 8 subunit beta OS=Homo sapiens OX=9606 GN=C8B PE=1 SV=1
F5H7G1|F5H7G1_HUMAN	37600000	46800000	40800000	35800000	47900000	43800000	1	1.25	1.09	0.95	1.27	1.17	Complement component 8 subunit beta OS=Homo sapiens OX=9606 GN=C8B PE=1 SV=1
sp|P07358|CO8B_HUMAN	37600000	46800000	40800000	35800000	47900000	43800000	1	1.25	1.09	0.95	1.27	1.17	Complement component C8 beta chain OS=Homo sapiens OX=9606 GN=C8B PE=1 SV=3
sp|O43866|CD5L_HUMAN	700000000	802000000	620000000	896000000	1110000000	886000000	1	1.15	0.89	1.28	1.59	1.27	CD5 antigen-like OS=Homo sapiens OX=9606 GN=CD5L PE=1 SV=1
sp|P01876|IGHA1_HUMAN	306000000	405000000	279000000	299000000	339000000	411000000	1	1.32	0.91	0.98	1.11	1.34	Immunoglobulin heavy constant alpha 1 OS=Homo sapiens OX=9606 GN=IGHA1 PE=1 SV=2
A0A286YEY1|A0A286YEY1_HUMAN	306000000	405000000	279000000	299000000	339000000	411000000	1	1.32	0.91	0.98	1.11	1.34	Immunoglobulin heavy constant alpha 1 (Fragment) OS=Homo sapiens OX=9606 GN=IGHA1 PE=1 SV=1
sp|B9A064|IGLL5_HUMAN	359000000	405000000	311000000	443000000	426000000	495000000	1	1.13	0.87	1.23	1.19	1.38	Immunoglobulin lambda-like polypeptide 5 OS=Homo sapiens OX=9606 GN=IGLL5 PE=2 SV=2
A0A0B4J231|A0A0B4J231_HUMAN	359000000	405000000	311000000	443000000	426000000	495000000	1	1.13	0.87	1.23	1.19	1.38	Immunoglobulin lambda-like polypeptide 5 OS=Homo sapiens OX=9606 GN=IGLL5 PE=1 SV=1
sp|P03951|FA11_HUMAN	20300000	27700000	21800000	22900000	28400000	22500000	1	1.36	1.07	1.12	1.4	1.11	Coagulation factor XI OS=Homo sapiens OX=9606 GN=F11 PE=1 SV=1
sp|Q14624|ITIH4_HUMAN	141000000	163000000	164000000	125000000	142000000	142000000	1	1.16	1.16	0.89	1.01	1.01	Inter-alpha-trypsin inhibitor heavy chain H4 OS=Homo sapiens OX=9606 GN=ITIH4 PE=1 SV=4
G3XAM2|G3XAM2_HUMAN	39800000	46500000	37500000	41600000	43800000	34600000	1	1.17	0.94	1.05	1.1	0.87	Complement factor I OS=Homo sapiens OX=9606 GN=CFI PE=1 SV=1
sp|P05156|CFAI_HUMAN	39800000	46500000	37500000	41600000	43800000	34600000	1	1.17	0.94	1.05	1.1	0.87	Complement factor I OS=Homo sapiens OX=9606 GN=CFI PE=1 SV=2
E7ETH0|E7ETH0_HUMAN	39800000	46500000	37500000	41600000	43800000	34600000	1	1.17	0.94	1.05	1.1	0.87	Complement factor I OS=Homo sapiens OX=9606 GN=CFI PE=1 SV=1
E9PGN7|E9PGN7_HUMAN	341000000	433000000	362000000	244000000	328000000	249000000	1	1.27	1.06	0.72	0.96	0.73	Plasma protease C1 inhibitor OS=Homo sapiens OX=9606 GN=SERPING1 PE=1 SV=1
A0A7I2V2D2|A0A7I2V2D2_HUMAN	341000000	433000000	362000000	244000000	328000000	249000000	1	1.27	1.06	0.72	0.96	0.73	Plasma protease C1 inhibitor OS=Homo sapiens OX=9606 GN=SERPING1 PE=1 SV=1
sp|P05155|IC1_HUMAN	341000000	433000000	362000000	244000000	328000000	249000000	1	1.27	1.06	0.72	0.96	0.73	Plasma protease C1 inhibitor OS=Homo sapiens OX=9606 GN=SERPING1 PE=1 SV=2
sp|P05546|HEP2_HUMAN	150000000	125000000	149000000	99600000	92200000	99100000	1	0.84	0.99	0.66	0.61	0.66	Heparin cofactor 2 OS=Homo sapiens OX=9606 GN=SERPIND1 PE=1 SV=3
sp|P19827|ITIH1_HUMAN	75300000	58500000	64300000	58300000	52000000	63400000	1	0.78	0.85	0.77	0.69	0.84	Inter-alpha-trypsin inhibitor heavy chain H1 OS=Homo sapiens OX=9606 GN=ITIH1 PE=1 SV=3
sp|P07357|CO8A_HUMAN	62700000	75900000	70200000	66400000	90200000	72200000	1	1.21	1.12	1.06	1.44	1.15	Complement component C8 alpha chain OS=Homo sapiens OX=9606 GN=C8A PE=1 SV=2
sp|P01861|IGHG4_HUMAN	183000000	236000000	266000000	80900000	64000000	129000000	1	1.29	1.45	0.44	0.35	0.71	Immunoglobulin heavy constant gamma 4 OS=Homo sapiens OX=9606 GN=IGHG4 PE=1 SV=1
A0A286YFJ8|A0A286YFJ8_HUMAN	183000000	236000000	266000000	80900000	64000000	129000000	1	1.29	1.45	0.44	0.35	0.71	Immunoglobulin heavy constant gamma 4 (Fragment) OS=Homo sapiens OX=9606 GN=IGHG4 PE=1 SV=1
sp|P0DOY3|IGLC3_HUMAN	2920000000	3670000000	2270000000	3570000000	2500000000	3460000000	1	1.26	0.78	1.22	0.86	1.18	Immunoglobulin lambda constant 3 OS=Homo sapiens OX=9606 GN=IGLC3 PE=1 SV=1
sp|P0DOY2|IGLC2_HUMAN	2920000000	3670000000	2270000000	3570000000	2500000000	3460000000	1	1.26	0.78	1.22	0.86	1.18	Immunoglobulin lambda constant 2 OS=Homo sapiens OX=9606 GN=IGLC2 PE=1 SV=1
sp|P08779|K1C16_HUMAN	2700000	4390000	2500000	5010000	4080000	6790000	1	1.63	0.93	1.86	1.51	2.52	Keratin type I cytoskeletal 16 OS=Homo sapiens OX=9606 GN=KRT16 PE=1 SV=4
sp|P23142|FBLN1_HUMAN	21200000	25200000	20900000	28600000	22300000	28000000	1	1.19	0.99	1.35	1.06	1.32	Fibulin-1 OS=Homo sapiens OX=9606 GN=FBLN1 PE=1 SV=4
sp|P35555|FBN1_HUMAN	22500000	23100000	23900000	20500000	17700000	17000000	1	1.03	1.06	0.91	0.79	0.75	Fibrillin-1 OS=Homo sapiens OX=9606 GN=FBN1 PE=1 SV=4
sp|P02538|K2C6A_HUMAN	2380000	3230000	2920000	3410000	2970000	6270000	1	1.36	1.23	1.43	1.25	2.64	Keratin type II cytoskeletal 6A OS=Homo sapiens OX=9606 GN=KRT6A PE=1 SV=3
sp|P98160|PGBM_HUMAN	11400000	12800000	12200000	13900000	12500000	13100000	1	1.12	1.07	1.22	1.1	1.15	Basement membrane-specific heparan sulfate proteoglycan core protein OS=Homo sapiens OX=9606 GN=HSPG2 PE=1 SV=4
sp|P68871|HBB_HUMAN	627000000	710000000	783000000	1130000000	1310000000	976000000	1	1.13	1.25	1.8	2.08	1.56	Hemoglobin subunit beta OS=Homo sapiens OX=9606 GN=HBB PE=1 SV=2
sp|Q5D862|FILA2_HUMAN	11800000	7940000	13100000	6920000	5130000	3790000	1	0.68	1.12	0.59	0.44	0.32	Filaggrin-2 OS=Homo sapiens OX=9606 GN=FLG2 PE=1 SV=1
sp|P00739|HPTR_HUMAN	4330000	8010000	4070000	9800000	9470000	10400000	1	1.85	0.94	2.27	2.19	2.41	Haptoglobin-related protein OS=Homo sapiens OX=9606 GN=HPR PE=2 SV=2
sp|P02760|AMBP_HUMAN	99000000	82000000	90600000	72400000	71900000	78200000	1	0.83	0.92	0.73	0.73	0.79	Protein AMBP OS=Homo sapiens OX=9606 GN=AMBP PE=1 SV=1
sp|Q12805|FBLN3_HUMAN	12700000	17100000	13200000	13600000	13300000	14400000	1	1.35	1.04	1.07	1.05	1.14	EGF-containing fibulin-like extracellular matrix protein 1 OS=Homo sapiens OX=9606 GN=EFEMP1 PE=1 SV=2
sp|P02765|FETUA_HUMAN	792000000	747000000	865000000	755000000	699000000	616000000	1	0.94	1.09	0.95	0.88	0.78	Alpha-2-HS-glycoprotein OS=Homo sapiens OX=9606 GN=AHSG PE=1 SV=2
sp|P04259|K2C6B_HUMAN	482000	1090000	448000	669000	526000	643000	1	2.27	0.93	1.39	1.09	1.33	Keratin type II cytoskeletal 6B OS=Homo sapiens OX=9606 GN=KRT6B PE=1 SV=5
sp|P21333|FLNA_HUMAN	27500000	24200000	23300000	23500000	11500000	11900000	1	0.88	0.85	0.85	0.42	0.43	Filamin-A OS=Homo sapiens OX=9606 GN=FLNA PE=1 SV=4
Q60FE5|Q60FE5_HUMAN	27500000	24200000	23300000	23500000	11500000	11900000	1	0.88	0.85	0.85	0.42	0.43	Filamin-A OS=Homo sapiens OX=9606 GN=FLNA PE=1 SV=1
sp|Q02985|FHR3_HUMAN	1230000	3100000	2400000	1920000	1800000	2460000	1	2.53	1.96	1.57	1.47	2.01	Complement factor H-related protein 3 OS=Homo sapiens OX=9606 GN=CFHR3 PE=1 SV=2
sp|P27918|PROP_HUMAN	100000000	125000000	94500000	148000000	134000000	142000000	1	1.25	0.94	1.48	1.33	1.42	Properdin OS=Homo sapiens OX=9606 GN=CFP PE=1 SV=2
V9GYE7|V9GYE7_HUMAN	25400000	34600000	15000000	25700000	32000000	54900000	1	1.36	0.59	1.01	1.26	2.16	Complement factor H-related protein 2 OS=Homo sapiens OX=9606 GN=CFHR2 PE=1 SV=1
sp|P36980|FHR2_HUMAN	25400000	34600000	15000000	25700000	32000000	54900000	1	1.36	0.59	1.01	1.26	2.16	Complement factor H-related protein 2 OS=Homo sapiens OX=9606 GN=CFHR2 PE=1 SV=1
A0A3B3IQ51|A0A3B3IQ51_HUMAN	25400000	34600000	15000000	25700000	32000000	54900000	1	1.36	0.59	1.01	1.26	2.16	Complement factor H-related protein 2 OS=Homo sapiens OX=9606 GN=CFHR2 PE=1 SV=1
sp|Q9BXR6|FHR5_HUMAN	29900000	40300000	34000000	38800000	39600000	45500000	1	1.35	1.14	1.3	1.32	1.52	Complement factor H-related protein 5 OS=Homo sapiens OX=9606 GN=CFHR5 PE=1 SV=1
sp|P04004|VTNC_HUMAN	301000000	299000000	271000000	234000000	283000000	239000000	1	0.99	0.9	0.78	0.94	0.79	Vitronectin OS=Homo sapiens OX=9606 GN=VTN PE=1 SV=1
sp|P12259|FA5_HUMAN	15900000	20100000	18300000	12400000	17500000	16300000	1	1.27	1.15	0.78	1.1	1.03	Coagulation factor V OS=Homo sapiens OX=9606 GN=F5 PE=1 SV=4
A0A0A0MRJ7|A0A0A0MRJ7_HUMAN	15900000	20100000	18300000	12400000	17500000	16300000	1	1.27	1.15	0.78	1.1	1.03	Coagulation factor V OS=Homo sapiens OX=9606 GN=F5 PE=1 SV=1
sp|P18206|VINC_HUMAN	11500000	15800000	8380000	7720000	8760000	9570000	1	1.37	0.73	0.67	0.76	0.83	Vinculin OS=Homo sapiens OX=9606 GN=VCL PE=1 SV=4
sp|P02042|HBD_HUMAN	12800000	15900000	15000000	20000000	21200000	19500000	1	1.24	1.18	1.57	1.66	1.52	Hemoglobin subunit delta OS=Homo sapiens OX=9606 GN=HBD PE=1 SV=2
F8WCZ6|F8WCZ6_HUMAN	53700000	62700000	55600000	43100000	48300000	45900000	1	1.17	1.03	0.8	0.9	0.85	Complement C1s subcomponent OS=Homo sapiens OX=9606 GN=C1S PE=1 SV=1
A0A087X232|A0A087X232_HUMAN	53700000	62700000	55600000	43100000	48300000	45900000	1	1.17	1.03	0.8	0.9	0.85	Complement C1s subcomponent OS=Homo sapiens OX=9606 GN=C1S PE=1 SV=1
sp|P09871|C1S_HUMAN	53700000	62700000	55600000	43100000	48300000	45900000	1	1.17	1.03	0.8	0.9	0.85	Complement C1s subcomponent OS=Homo sapiens OX=9606 GN=C1S PE=1 SV=1
sp|P01877|IGHA2_HUMAN	565000	655000	698000	546000	522000	434000	1	1.16	1.23	0.96	0.92	0.77	Immunoglobulin heavy constant alpha 2 OS=Homo sapiens OX=9606 GN=IGHA2 PE=1 SV=4
A0A286YEY5|A0A286YEY5_HUMAN	565000	655000	698000	546000	522000	434000	1	1.16	1.23	0.96	0.92	0.77	Immunoglobulin heavy constant alpha 2 (Fragment) OS=Homo sapiens OX=9606 GN=IGHA2 PE=1 SV=1
sp|P00748|FA12_HUMAN	15300000	23300000	23500000	18500000	19500000	16400000	1	1.53	1.54	1.21	1.28	1.08	Coagulation factor XII OS=Homo sapiens OX=9606 GN=F12 PE=1 SV=3
sp|P08697|A2AP_HUMAN	43600000	54300000	47200000	44900000	54400000	46700000	1	1.24	1.08	1.03	1.25	1.07	Alpha-2-antiplasmin OS=Homo sapiens OX=9606 GN=SERPINF2 PE=1 SV=3
sp|P11021|BIP_HUMAN	6530000	8900000	7520000	7290000	8400000	7510000	1	1.36	1.15	1.12	1.29	1.15	Endoplasmic reticulum chaperone BiP OS=Homo sapiens OX=9606 GN=HSPA5 PE=1 SV=2
A0A7P0TAI0|A0A7P0TAI0_HUMAN	6530000	8900000	7520000	7290000	8400000	7510000	1	1.36	1.15	1.12	1.29	1.15	Endoplasmic reticulum chaperone BiP OS=Homo sapiens OX=9606 GN=HSPA5 PE=4 SV=1
sp|P04217|A1BG_HUMAN	196000000	200000000	185000000	157000000	163000000	181000000	1	1.02	0.94	0.8	0.83	0.92	Alpha-1B-glycoprotein OS=Homo sapiens OX=9606 GN=A1BG PE=1 SV=4
sp|P48740|MASP1_HUMAN	21000000	23300000	20200000	17500000	21600000	18800000	1	1.11	0.96	0.83	1.02	0.89	Mannan-binding lectin serine protease 1 OS=Homo sapiens OX=9606 GN=MASP1 PE=1 SV=3
sp|P51884|LUM_HUMAN	51400000	42800000	57100000	44500000	35200000	38300000	1	0.83	1.11	0.87	0.68	0.75	Lumican OS=Homo sapiens OX=9606 GN=LUM PE=1 SV=2
A0A4W8ZXM2|A0A4W8ZXM2_HUMAN	15100000	19300000	17200000	18800000	15600000	18800000	1	1.28	1.14	1.25	1.04	1.25	Immunoglobulin heavy variable 3-72 OS=Homo sapiens OX=9606 GN=IGHV3-72 PE=1 SV=1
sp|P35858|ALS_HUMAN	12400000	12800000	16200000	16100000	11500000	14100000	1	1.03	1.31	1.3	0.93	1.14	Insulin-like growth factor-binding protein complex acid labile subunit OS=Homo sapiens OX=9606 GN=IGFALS PE=1 SV=1
sp|P02748|CO9_HUMAN	24800000	44400000	32900000	23700000	37700000	37300000	1	1.79	1.33	0.96	1.52	1.5	Complement component C9 OS=Homo sapiens OX=9606 GN=C9 PE=1 SV=2
sp|P29622|KAIN_HUMAN	24700000	22700000	23300000	21000000	17500000	20100000	1	0.92	0.95	0.85	0.71	0.81	Kallistatin OS=Homo sapiens OX=9606 GN=SERPINA4 PE=1 SV=3
sp|P20851|C4BPB_HUMAN	258000000	295000000	255000000	358000000	440000000	347000000	1	1.14	0.99	1.38	1.7	1.34	C4b-binding protein beta chain OS=Homo sapiens OX=9606 GN=C4BPB PE=1 SV=1
sp|P06681|CO2_HUMAN	2780000	2610000	3380000	2560000	3490000	2750000	1	0.94	1.22	0.92	1.26	0.99	Complement C2 OS=Homo sapiens OX=9606 GN=C2 PE=1 SV=2
sp|O14791|APOL1_HUMAN	99500000	132000000	93500000	152000000	126000000	123000000	1	1.33	0.94	1.53	1.27	1.24	Apolipoprotein L1 OS=Homo sapiens OX=9606 GN=APOL1 PE=1 SV=5
sp|P01619|KV320_HUMAN	5740000	10300000	7240000	8270000	9250000	7900000	1	1.79	1.26	1.44	1.61	1.38	Immunoglobulin kappa variable 3-20 OS=Homo sapiens OX=9606 GN=IGKV3-20 PE=1 SV=2
sp|P04196|HRG_HUMAN	166000000	164000000	187000000	128000000	172000000	138000000	1	0.98	1.12	0.77	1.03	0.83	Histidine-rich glycoprotein OS=Homo sapiens OX=9606 GN=HRG PE=1 SV=1
sp|P80108|PHLD_HUMAN	11600000	11900000	12100000	11000000	11200000	10700000	1	1.02	1.04	0.95	0.96	0.92	Phosphatidylinositol-glycan-specific phospholipase D OS=Homo sapiens OX=9606 GN=GPLD1 PE=1 SV=3
sp|P10909|CLUS_HUMAN	148000000	178000000	166000000	181000000	205000000	178000000	1	1.21	1.12	1.23	1.39	1.2	Clusterin OS=Homo sapiens OX=9606 GN=CLU PE=1 SV=1
sp|P35579|MYH9_HUMAN	21600000	15900000	25000000	11800000	8230000	8150000	1	0.73	1.16	0.55	0.38	0.38	Myosin-9 OS=Homo sapiens OX=9606 GN=MYH9 PE=1 SV=4
sp|O75636|FCN3_HUMAN	36300000	37700000	35400000	50200000	70300000	56000000	1	1.04	0.98	1.38	1.94	1.54	Ficolin-3 OS=Homo sapiens OX=9606 GN=FCN3 PE=1 SV=2
sp|P02730|B3AT_HUMAN	11500000	13700000	10700000	16700000	29200000	23200000	1	1.19	0.93	1.45	2.55	2.02	Band 3 anion transport protein OS=Homo sapiens OX=9606 GN=SLC4A1 PE=1 SV=3
sp|P22792|CPN2_HUMAN	22300000	23500000	22500000	21400000	21900000	18900000	1	1.06	1.01	0.96	0.99	0.85	Carboxypeptidase N subunit 2 OS=Homo sapiens OX=9606 GN=CPN2 PE=1 SV=3
sp|P02749|APOH_HUMAN	525000000	474000000	464000000	515000000	547000000	385000000	1	0.9	0.88	0.98	1.04	0.73	Beta-2-glycoprotein 1 OS=Homo sapiens OX=9606 GN=APOH PE=1 SV=3
sp|P04040|CATA_HUMAN	7180000	9240000	6960000	9380000	14900000	11300000	1	1.29	0.97	1.31	2.08	1.57	Catalase OS=Homo sapiens OX=9606 GN=CAT PE=1 SV=3
sp|P15924|DESP_HUMAN	14200000	17600000	15400000	13300000	16000000	15100000	1	1.24	1.08	0.94	1.13	1.06	Desmoplakin OS=Homo sapiens OX=9606 GN=DSP PE=1 SV=3
sp|Q04695|K1C17_HUMAN	2190000	3450000	2180000	3510000	3110000	2910000	1	1.58	1	1.6	1.42	1.33	Keratin type I cytoskeletal 17 OS=Homo sapiens OX=9606 GN=KRT17 PE=1 SV=2
I3L4N8|I3L4N8_HUMAN	40600000	43800000	31600000	27400000	32800000	47400000	1	1.08	0.78	0.67	0.81	1.17	Actin cytoplasmic 2 OS=Homo sapiens OX=9606 GN=ACTG1 PE=1 SV=9
sp|P63261|ACTG_HUMAN	40600000	43800000	31600000	27400000	32800000	47400000	1	1.08	0.78	0.67	0.81	1.17	Actin cytoplasmic 2 OS=Homo sapiens OX=9606 GN=ACTG1 PE=1 SV=1
sp|P60709|ACTB_HUMAN	40600000	43800000	31600000	27400000	32800000	47400000	1	1.08	0.78	0.67	0.81	1.17	Actin cytoplasmic 1 OS=Homo sapiens OX=9606 GN=ACTB PE=1 SV=1
sp|P69905|HBA_HUMAN	584000000	716000000	736000000	1160000000	1290000000	936000000	1	1.23	1.26	1.99	2.2	1.6	Hemoglobin subunit alpha OS=Homo sapiens OX=9606 GN=HBA2 PE=1 SV=2
sp|P05090|APOD_HUMAN	118000000	140000000	122000000	105000000	215000000	96400000	1	1.19	1.04	0.89	1.83	0.82	Apolipoprotein D OS=Homo sapiens OX=9606 GN=APOD PE=1 SV=1
C9JF17|C9JF17_HUMAN	118000000	140000000	122000000	105000000	215000000	96400000	1	1.19	1.04	0.89	1.83	0.82	Apolipoprotein D (Fragment) OS=Homo sapiens OX=9606 GN=APOD PE=1 SV=1
sp|P05543|THBG_HUMAN	15800000	17200000	18100000	15500000	12600000	15300000	1	1.09	1.14	0.98	0.79	0.97	Thyroxine-binding globulin OS=Homo sapiens OX=9606 GN=SERPINA7 PE=1 SV=2
sp|P02743|SAMP_HUMAN	23800000	118000000	32900000	39400000	25200000	28800000	1	4.96	1.38	1.65	1.06	1.21	Serum amyloid P-component OS=Homo sapiens OX=9606 GN=APCS PE=1 SV=2
A0A5H1ZRQ7|A0A5H1ZRQ7_HUMAN	3050000	3470000	2630000	3370000	3770000	2230000	1	1.14	0.86	1.11	1.24	0.73	Immunoglobulin lambda constant 7 (Fragment) OS=Homo sapiens OX=9606 GN=IGLC7 PE=1 SV=1
sp|A0M8Q6|IGLC7_HUMAN	3050000	3470000	2630000	3370000	3770000	2230000	1	1.14	0.86	1.11	1.24	0.73	Immunoglobulin lambda constant 7 OS=Homo sapiens OX=9606 GN=IGLC7 PE=1 SV=3
sp|P36955|PEDF_HUMAN	32800000	34300000	32400000	37100000	28100000	33800000	1	1.05	0.99	1.13	0.86	1.03	Pigment epithelium-derived factor OS=Homo sapiens OX=9606 GN=SERPINF1 PE=1 SV=4
A0A087WSY5|A0A087WSY5_HUMAN	25200000	27400000	25000000	22000000	26600000	26200000	1	1.09	0.99	0.87	1.06	1.04	Carboxypeptidase B2 OS=Homo sapiens OX=9606 GN=CPB2 PE=1 SV=1
sp|Q96IY4|CBPB2_HUMAN	25200000	27400000	25000000	22000000	26600000	26200000	1	1.09	0.99	0.87	1.06	1.04	Carboxypeptidase B2 OS=Homo sapiens OX=9606 GN=CPB2 PE=1 SV=2
sp|Q9UGM5|FETUB_HUMAN	16900000	20600000	20900000	17500000	14600000	18100000	1	1.22	1.24	1.04	0.86	1.07	Fetuin-B OS=Homo sapiens OX=9606 GN=FETUB PE=1 SV=2
sp|P27169|PON1_HUMAN	85700000	80100000	72200000	71400000	63500000	74000000	1	0.93	0.84	0.83	0.74	0.86	Serum paraoxonase/arylesterase 1 OS=Homo sapiens OX=9606 GN=PON1 PE=1 SV=3
sp|P02775|CXCL7_HUMAN	64500000	93500000	57500000	55800000	60100000	64600000	1	1.45	0.89	0.86	0.93	1	Platelet basic protein OS=Homo sapiens OX=9606 GN=PPBP PE=1 SV=3
sp|Q06033|ITIH3_HUMAN	14700000	22200000	21800000	13400000	21100000	15800000	1	1.51	1.48	0.91	1.44	1.08	Inter-alpha-trypsin inhibitor heavy chain H3 OS=Homo sapiens OX=9606 GN=ITIH3 PE=1 SV=2
sp|P01019|ANGT_HUMAN	62600000	54200000	57200000	44800000	55700000	40600000	1	0.87	0.91	0.72	0.89	0.65	Angiotensinogen OS=Homo sapiens OX=9606 GN=AGT PE=1 SV=1
A0A7P0TBH1|A0A7P0TBH1_HUMAN	62600000	54200000	57200000	44800000	55700000	40600000	1	0.87	0.91	0.72	0.89	0.65	Angiotensinogen OS=Homo sapiens OX=9606 GN=AGT PE=4 SV=1
A0A7P0T8D1|A0A7P0T8D1_HUMAN	62600000	54200000	57200000	44800000	55700000	40600000	1	0.87	0.91	0.72	0.89	0.65	Angiotensinogen OS=Homo sapiens OX=9606 GN=AGT PE=4 SV=1
D6RAR4|D6RAR4_HUMAN	11100000	10400000	11300000	8840000	9430000	7950000	1	0.94	1.02	0.79	0.85	0.71	Hepatocyte growth factor activator OS=Homo sapiens OX=9606 GN=HGFAC PE=1 SV=1
sp|P01591|IGJ_HUMAN	310000000	461000000	259000000	424000000	590000000	419000000	1	1.48	0.83	1.37	1.9	1.35	Immunoglobulin J chain OS=Homo sapiens OX=9606 GN=JCHAIN PE=1 SV=4
sp|P02747|C1QC_HUMAN	439000000	364000000	543000000	592000000	505000000	701000000	1	0.83	1.24	1.35	1.15	1.6	Complement C1q subcomponent subunit C OS=Homo sapiens OX=9606 GN=C1QC PE=1 SV=3
sp|P01011|AACT_HUMAN	324000000	376000000	323000000	263000000	311000000	269000000	1	1.16	1	0.81	0.96	0.83	Alpha-1-antichymotrypsin OS=Homo sapiens OX=9606 GN=SERPINA3 PE=1 SV=2
A0A6Q8PFJ0|A0A6Q8PFJ0_HUMAN	113000000	60500000	116000000	57600000	9510000	15800000	1	0.53	1.02	0.51	0.08	0.14	Prelamin-A/C OS=Homo sapiens OX=9606 GN=LMNA PE=1 SV=1
sp|P02545|LMNA_HUMAN	113000000	60500000	116000000	57600000	9510000	15800000	1	0.53	1.02	0.51	0.08	0.14	Prelamin-A/C OS=Homo sapiens OX=9606 GN=LMNA PE=1 SV=1
A0A6Q8PHQ9|A0A6Q8PHQ9_HUMAN	113000000	60500000	116000000	57600000	9510000	15800000	1	0.53	1.02	0.51	0.08	0.14	Prelamin-A/C OS=Homo sapiens OX=9606 GN=LMNA PE=1 SV=1
sp|P02656|APOC3_HUMAN	523000000	446000000	311000000	765000000	664000000	468000000	1	0.85	0.59	1.46	1.27	0.89	Apolipoprotein C-III OS=Homo sapiens OX=9606 GN=APOC3 PE=1 SV=1
B0YIW2|B0YIW2_HUMAN	523000000	446000000	311000000	765000000	664000000	468000000	1	0.85	0.59	1.46	1.27	0.89	Apolipoprotein C-III OS=Homo sapiens OX=9606 GN=APOC3 PE=1 SV=1
A0A087WXI2|A0A087WXI2_HUMAN	7420000	9030000	7520000	8660000	7990000	8000000	1	1.22	1.01	1.17	1.08	1.08	IgGFc-binding protein OS=Homo sapiens OX=9606 GN=FCGBP PE=1 SV=3
sp|Q9Y6R7|FCGBP_HUMAN	7420000	9030000	7520000	8660000	7990000	8000000	1	1.22	1.01	1.17	1.08	1.08	IgGFc-binding protein OS=Homo sapiens OX=9606 GN=FCGBP PE=1 SV=3
B1AHL2|B1AHL2_HUMAN	568000	805000	593000	820000	643000	813000	1	1.42	1.04	1.44	1.13	1.43	Fibulin-1 OS=Homo sapiens OX=9606 GN=FBLN1 PE=1 SV=1
sp|P05106|ITB3_HUMAN	4050000	5320000	3640000	2980000	4410000	4440000	1	1.32	0.9	0.74	1.09	1.1	Integrin beta-3 OS=Homo sapiens OX=9606 GN=ITGB3 PE=1 SV=2
sp|Q8NI99|ANGL6_HUMAN	5100000	5550000	5910000	4770000	5580000	6670000	1	1.09	1.16	0.94	1.1	1.31	Angiopoietin-related protein 6 OS=Homo sapiens OX=9606 GN=ANGPTL6 PE=1 SV=1
K7EKF6|K7EKF6_HUMAN	5100000	5550000	5910000	4770000	5580000	6670000	1	1.09	1.16	0.94	1.1	1.31	Angiopoietin-related protein 6 OS=Homo sapiens OX=9606 GN=ANGPTL6 PE=1 SV=1
sp|P02763|A1AG1_HUMAN	165000000	322000000	200000000	221000000	285000000	240000000	1	1.95	1.21	1.34	1.73	1.45	Alpha-1-acid glycoprotein 1 OS=Homo sapiens OX=9606 GN=ORM1 PE=1 SV=1
sp|P19652|A1AG2_HUMAN	37900000	41700000	37600000	30100000	31200000	28100000	1	1.1	0.99	0.79	0.82	0.74	Alpha-1-acid glycoprotein 2 OS=Homo sapiens OX=9606 GN=ORM2 PE=1 SV=2
A0A0A0MSV6|A0A0A0MSV6_HUMAN	582000000	471000000	711000000	812000000	808000000	1060000000	1	0.81	1.22	1.39	1.39	1.81	Complement C1q subcomponent subunit B (Fragment) OS=Homo sapiens OX=9606 GN=C1QB PE=1 SV=6
D6R934|D6R934_HUMAN	582000000	471000000	711000000	812000000	808000000	1060000000	1	0.81	1.22	1.39	1.39	1.81	Complement C1q subcomponent subunit B OS=Homo sapiens OX=9606 GN=C1QB PE=1 SV=1
sp|P02746|C1QB_HUMAN	582000000	471000000	711000000	812000000	808000000	1060000000	1	0.81	1.22	1.39	1.39	1.81	Complement C1q subcomponent subunit B OS=Homo sapiens OX=9606 GN=C1QB PE=1 SV=3
sp|P04180|LCAT_HUMAN	8650000	9680000	9160000	8790000	8580000	8170000	1	1.12	1.06	1.02	0.99	0.94	Phosphatidylcholine-sterol acyltransferase OS=Homo sapiens OX=9606 GN=LCAT PE=1 SV=1
sp|P14543|NID1_HUMAN	4740000	6900000	5070000	4590000	5000000	5150000	1	1.46	1.07	0.97	1.05	1.09	Nidogen-1 OS=Homo sapiens OX=9606 GN=NID1 PE=1 SV=3
sp|O00187|MASP2_HUMAN	8570000	9440000	9720000	8960000	13500000	9520000	1	1.1	1.13	1.05	1.57	1.11	Mannan-binding lectin serine protease 2 OS=Homo sapiens OX=9606 GN=MASP2 PE=1 SV=4
A0A0J9YY99|A0A0J9YY99_HUMAN	98700000	113000000	88500000	95500000	115000000	104000000	1	1.15	0.9	0.97	1.17	1.05	Ig-like domain-containing protein (Fragment) OS=Homo sapiens OX=9606 PE=1 SV=1
sp|P01768|HV330_HUMAN	98700000	113000000	88500000	95500000	115000000	104000000	1	1.15	0.9	0.97	1.17	1.05	Immunoglobulin heavy variable 3-30 OS=Homo sapiens OX=9606 GN=IGHV3-30 PE=1 SV=2
sp|P0DP03|HVC05_HUMAN	98700000	113000000	88500000	95500000	115000000	104000000	1	1.15	0.9	0.97	1.17	1.05	Immunoglobulin heavy variable 3-30-5 OS=Homo sapiens OX=9606 GN=IGHV3-30-5 PE=3 SV=1
sp|Q76LX8|ATS13_HUMAN	3780000	4300000	4430000	4010000	5920000	4480000	1	1.14	1.17	1.06	1.57	1.18	A disintegrin and metalloproteinase with thrombospondin motifs 13 OS=Homo sapiens OX=9606 GN=ADAMTS13 PE=1 SV=1
Q5VY30|Q5VY30_HUMAN	44100000	37800000	36700000	32700000	29100000	34200000	1	0.86	0.83	0.74	0.66	0.78	Retinol-binding protein OS=Homo sapiens OX=9606 GN=RBP4 PE=1 SV=2
sp|P02753|RET4_HUMAN	44100000	37800000	36700000	32700000	29100000	34200000	1	0.86	0.83	0.74	0.66	0.78	Retinol-binding protein 4 OS=Homo sapiens OX=9606 GN=RBP4 PE=1 SV=3
sp|P05154|IPSP_HUMAN	9370000	9070000	8700000	9180000	6140000	7870000	1	0.97	0.93	0.98	0.65	0.84	Plasma serine protease inhibitor OS=Homo sapiens OX=9606 GN=SERPINA5 PE=1 SV=3
sp|O43790|KRT86_HUMAN	7500000	8300000	11700000	6100000	64100000	8380000	1	1.11	1.56	0.81	8.55	1.12	Keratin type II cuticular Hb6 OS=Homo sapiens OX=9606 GN=KRT86 PE=1 SV=1
A0A087X106|A0A087X106_HUMAN	7500000	8300000	11700000	6100000	64100000	8380000	1	1.11	1.56	0.81	8.55	1.12	Keratin type II cuticular Hb1 OS=Homo sapiens OX=9606 GN=KRT81 PE=1 SV=1
sp|Q14533|KRT81_HUMAN	7500000	8300000	11700000	6100000	64100000	8380000	1	1.11	1.56	0.81	8.55	1.12	Keratin type II cuticular Hb1 OS=Homo sapiens OX=9606 GN=KRT81 PE=1 SV=3
sp|P78385|KRT83_HUMAN	7500000	8300000	11700000	6100000	64100000	8380000	1	1.11	1.56	0.81	8.55	1.12	Keratin type II cuticular Hb3 OS=Homo sapiens OX=9606 GN=KRT83 PE=1 SV=2
sp|P04406|G3P_HUMAN	20400000	26500000	18300000	24500000	22900000	18800000	1	1.3	0.9	1.2	1.13	0.92	Glyceraldehyde-3-phosphate dehydrogenase OS=Homo sapiens OX=9606 GN=GAPDH PE=1 SV=3
sp|Q14520|HABP2_HUMAN	25600000	29100000	25600000	24000000	26200000	26000000	1	1.14	1	0.94	1.02	1.01	Hyaluronan-binding protein 2 OS=Homo sapiens OX=9606 GN=HABP2 PE=1 SV=1
sp|P39060|COIA1_HUMAN	7000000	8040000	7030000	8850000	5320000	8150000	1	1.15	1	1.26	0.76	1.16	Collagen alpha-1(XVIII) chain OS=Homo sapiens OX=9606 GN=COL18A1 PE=1 SV=5
H7BXV5|H7BXV5_HUMAN	7000000	8040000	7030000	8850000	5320000	8150000	1	1.15	1	1.26	0.76	1.16	Collagen alpha-1(XVIII) chain (Fragment) OS=Homo sapiens OX=9606 GN=COL18A1 PE=1 SV=1
sp|P08514|ITA2B_HUMAN	5740000	6780000	4500000	3790000	5150000	5500000	1	1.18	0.78	0.66	0.9	0.96	Integrin alpha-IIb OS=Homo sapiens OX=9606 GN=ITGA2B PE=1 SV=3
sp|P12111|CO6A3_HUMAN	6220000	7140000	6900000	7470000	7880000	8140000	1	1.15	1.11	1.2	1.27	1.31	Collagen alpha-3(VI) chain OS=Homo sapiens OX=9606 GN=COL6A3 PE=1 SV=5
sp|Q7Z794|K2C1B_HUMAN	2340000	2810000	2010000	1910000	1950000	1550000	1	1.2	0.86	0.82	0.84	0.66	Keratin type II cytoskeletal 1b OS=Homo sapiens OX=9606 GN=KRT77 PE=1 SV=3
sp|A0A0C4DH38|HV551_HUMAN	2840000	3470000	3600000	3690000	2880000	4870000	1	1.22	1.27	1.3	1.01	1.71	Immunoglobulin heavy variable 5-51 OS=Homo sapiens OX=9606 GN=IGHV5-51 PE=3 SV=1
sp|Q08380|LG3BP_HUMAN	17200000	51100000	20900000	17400000	16900000	17000000	1	2.98	1.22	1.01	0.98	0.99	Galectin-3-binding protein OS=Homo sapiens OX=9606 GN=LGALS3BP PE=1 SV=1
E9PHK0|E9PHK0_HUMAN	6760000	8190000	7650000	6920000	6260000	6780000	1	1.21	1.13	1.02	0.93	1	Tetranectin OS=Homo sapiens OX=9606 GN=CLEC3B PE=1 SV=1
sp|P05452|TETN_HUMAN	6760000	8190000	7650000	6920000	6260000	6780000	1	1.21	1.13	1.02	0.93	1	Tetranectin OS=Homo sapiens OX=9606 GN=CLEC3B PE=1 SV=3
sp|P07360|CO8G_HUMAN	13800000	17200000	14200000	19400000	18000000	16500000	1	1.24	1.03	1.41	1.3	1.19	Complement component C8 gamma chain OS=Homo sapiens OX=9606 GN=C8G PE=1 SV=3
sp|P55056|APOC4_HUMAN	44100000	41500000	32800000	59600000	58700000	31000000	1	0.94	0.74	1.35	1.33	0.7	Apolipoprotein C-IV OS=Homo sapiens OX=9606 GN=APOC4 PE=1 SV=1
sp|P11226|MBL2_HUMAN	20000000	22200000	15000000	37700000	30400000	16400000	1	1.11	0.75	1.89	1.53	0.82	Mannose-binding protein C OS=Homo sapiens OX=9606 GN=MBL2 PE=1 SV=2
sp|Q9UHG3|PCYOX_HUMAN	5920000	6520000	6260000	7050000	8180000	4650000	1	1.1	1.06	1.19	1.38	0.79	Prenylcysteine oxidase 1 OS=Homo sapiens OX=9606 GN=PCYOX1 PE=1 SV=3
A0A087WTA8|A0A087WTA8_HUMAN	51000000	27700000	53900000	17000000	12600000	11000000	1	0.54	1.06	0.33	0.25	0.22	Collagen alpha-2(I) chain OS=Homo sapiens OX=9606 GN=COL1A2 PE=1 SV=1
sp|P08123|CO1A2_HUMAN	51000000	27700000	53900000	17000000	12600000	11000000	1	0.54	1.06	0.33	0.25	0.22	Collagen alpha-2(I) chain OS=Homo sapiens OX=9606 GN=COL1A2 PE=1 SV=7
sp|P32119|PRDX2_HUMAN	21700000	27000000	21700000	37500000	50100000	35200000	1	1.24	1	1.72	2.3	1.62	Peroxiredoxin-2 OS=Homo sapiens OX=9606 GN=PRDX2 PE=1 SV=5
sp|A0A0A0MS15|HV349_HUMAN	11100000	15500000	13300000	11400000	11800000	12900000	1	1.39	1.19	1.02	1.06	1.16	Immunoglobulin heavy variable 3-49 OS=Homo sapiens OX=9606 GN=IGHV3-49 PE=3 SV=1
sp|P00740|FA9_HUMAN	10800000	10300000	10100000	8280000	14400000	8970000	1	0.95	0.94	0.77	1.34	0.83	Coagulation factor IX OS=Homo sapiens OX=9606 GN=F9 PE=1 SV=2
sp|A0A0B4J1V6|HV373_HUMAN	1720000	2260000	2090000	1760000	1950000	1380000	1	1.32	1.22	1.03	1.13	0.8	Immunoglobulin heavy variable 3-73 OS=Homo sapiens OX=9606 GN=IGHV3-73 PE=3 SV=1
sp|Q96PD5|PGRP2_HUMAN	19300000	16600000	18000000	13500000	10600000	12200000	1	0.86	0.93	0.7	0.55	0.63	N-acetylmuramoyl-L-alanine amidase OS=Homo sapiens OX=9606 GN=PGLYRP2 PE=1 SV=1
sp|P02750|A2GL_HUMAN	23400000	27100000	25100000	21900000	27200000	20500000	1	1.16	1.07	0.94	1.16	0.88	Leucine-rich alpha-2-glycoprotein OS=Homo sapiens OX=9606 GN=LRG1 PE=1 SV=2
A0A087X1J7|A0A087X1J7_HUMAN	30200000	37700000	33500000	25000000	24800000	29900000	1	1.25	1.11	0.83	0.82	0.99	Glutathione peroxidase OS=Homo sapiens OX=9606 GN=GPX3 PE=1 SV=1
sp|P22352|GPX3_HUMAN	30200000	37700000	33500000	25000000	24800000	29900000	1	1.25	1.11	0.83	0.82	0.99	Glutathione peroxidase 3 OS=Homo sapiens OX=9606 GN=GPX3 PE=1 SV=2
I3L145|I3L145_HUMAN	22300000	21600000	22100000	17100000	14300000	14900000	1	0.97	0.99	0.77	0.64	0.67	Sex hormone-binding globulin OS=Homo sapiens OX=9606 GN=SHBG PE=1 SV=1
sp|P04278|SHBG_HUMAN	22300000	21600000	22100000	17100000	14300000	14900000	1	0.97	0.99	0.77	0.64	0.67	Sex hormone-binding globulin OS=Homo sapiens OX=9606 GN=SHBG PE=1 SV=2
I3L1J1|I3L1J1_HUMAN	22300000	21600000	22100000	17100000	14300000	14900000	1	0.97	0.99	0.77	0.64	0.67	Sex hormone-binding globulin OS=Homo sapiens OX=9606 GN=SHBG PE=1 SV=1
A0A0C4DGN2|A0A0C4DGN2_HUMAN	22300000	21600000	22100000	17100000	14300000	14900000	1	0.97	0.99	0.77	0.64	0.67	Sex hormone-binding globulin (Fragment) OS=Homo sapiens OX=9606 GN=SHBG PE=1 SV=1
sp|A0A0B4J1X5|HV374_HUMAN	14900000	11900000	13100000	12600000	10000000	9620000	1	0.8	0.88	0.85	0.67	0.65	Immunoglobulin heavy variable 3-74 OS=Homo sapiens OX=9606 GN=IGHV3-74 PE=3 SV=1
E9PC84|E9PC84_HUMAN	7790000	9660000	9650000	10100000	10600000	9850000	1	1.24	1.24	1.29	1.36	1.26	Tenascin OS=Homo sapiens OX=9606 GN=TNC PE=1 SV=1
sp|P24821|TENA_HUMAN	7790000	9660000	9650000	10100000	10600000	9850000	1	1.24	1.24	1.29	1.36	1.26	Tenascin OS=Homo sapiens OX=9606 GN=TNC PE=1 SV=3
V9GYM3|V9GYM3_HUMAN	904000000	1370000000	813000000	852000000	760000000	621000000	1	1.51	0.9	0.94	0.84	0.69	Apolipoprotein A-II OS=Homo sapiens OX=9606 GN=APOA2 PE=1 SV=1
V9GYG9|V9GYG9_HUMAN	904000000	1370000000	813000000	852000000	760000000	621000000	1	1.51	0.9	0.94	0.84	0.69	Apolipoprotein A-II (Fragment) OS=Homo sapiens OX=9606 GN=APOA2 PE=1 SV=1
sp|P02652|APOA2_HUMAN	904000000	1370000000	813000000	852000000	760000000	621000000	1	1.51	0.9	0.94	0.84	0.69	Apolipoprotein A-II OS=Homo sapiens OX=9606 GN=APOA2 PE=1 SV=1
Q5TCU3|Q5TCU3_HUMAN	1510000	1680000	1080000	1230000	280000	450000	1	1.11	0.71	0.82	0.19	0.3	Tropomyosin beta chain OS=Homo sapiens OX=9606 GN=TPM2 PE=1 SV=1
sp|P07951|TPM2_HUMAN	1510000	1680000	1080000	1230000	280000	450000	1	1.11	0.71	0.82	0.19	0.3	Tropomyosin beta chain OS=Homo sapiens OX=9606 GN=TPM2 PE=1 SV=1
A7XZE4|A7XZE4_HUMAN	1510000	1680000	1080000	1230000	280000	450000	1	1.11	0.71	0.82	0.19	0.3	Beta tropomyosin isoform OS=Homo sapiens OX=9606 GN=TPM2 PE=1 SV=1
K7ER74|K7ER74_HUMAN	493000000	267000000	246000000	360000000	370000000	214000000	1	0.54	0.5	0.73	0.75	0.43	Apolipoprotein C-II OS=Homo sapiens OX=9606 GN=APOC4-APOC2 PE=1 SV=1
sp|P01833|PIGR_HUMAN	5690000	7460000	5990000	6030000	8070000	5810000	1	1.31	1.05	1.06	1.42	1.02	Polymeric immunoglobulin receptor OS=Homo sapiens OX=9606 GN=PIGR PE=1 SV=4
sp|P08185|CBG_HUMAN	86800000	89100000	90200000	50000000	60400000	62300000	1	1.03	1.04	0.58	0.7	0.72	Corticosteroid-binding globulin OS=Homo sapiens OX=9606 GN=SERPINA6 PE=1 SV=1
A0A096LPE2|A0A096LPE2_HUMAN	79900000	64500000	63000000	81800000	106000000	54900000	1	0.81	0.79	1.02	1.33	0.69	SAA2-SAA4 readthrough OS=Homo sapiens OX=9606 GN=SAA2-SAA4 PE=3 SV=1
sp|P33151|CADH5_HUMAN	5920000	6150000	6550000	6040000	5560000	5380000	1	1.04	1.11	1.02	0.94	0.91	Cadherin-5 OS=Homo sapiens OX=9606 GN=CDH5 PE=1 SV=5
sp|P01780|HV307_HUMAN	248000000	232000000	201000000	236000000	257000000	201000000	1	0.93	0.81	0.95	1.03	0.81	Immunoglobulin heavy variable 3-7 OS=Homo sapiens OX=9606 GN=IGHV3-7 PE=1 SV=2
sp|P07355|ANXA2_HUMAN	4330000	4350000	3720000	3760000	2660000	2200000	1	1	0.86	0.87	0.61	0.51	Annexin A2 OS=Homo sapiens OX=9606 GN=ANXA2 PE=1 SV=2
H0YMW4|H0YMW4_HUMAN	4330000	4350000	3720000	3760000	2660000	2200000	1	1	0.86	0.87	0.61	0.51	Annexin OS=Homo sapiens OX=9606 GN=ANXA2 PE=1 SV=2
H0YMD0|H0YMD0_HUMAN	4330000	4350000	3720000	3760000	2660000	2200000	1	1	0.86	0.87	0.61	0.51	Annexin (Fragment) OS=Homo sapiens OX=9606 GN=ANXA2 PE=1 SV=1
H0YMU9|H0YMU9_HUMAN	4330000	4350000	3720000	3760000	2660000	2200000	1	1	0.86	0.87	0.61	0.51	Annexin OS=Homo sapiens OX=9606 GN=ANXA2 PE=1 SV=1
H0YN42|H0YN42_HUMAN	4330000	4350000	3720000	3760000	2660000	2200000	1	1	0.86	0.87	0.61	0.51	Annexin (Fragment) OS=Homo sapiens OX=9606 GN=ANXA2 PE=1 SV=1
H0YM50|H0YM50_HUMAN	4330000	4350000	3720000	3760000	2660000	2200000	1	1	0.86	0.87	0.61	0.51	Annexin (Fragment) OS=Homo sapiens OX=9606 GN=ANXA2 PE=1 SV=1
sp|P16452|EPB42_HUMAN	2320000	2700000	2150000	2920000	6040000	4070000	1	1.16	0.93	1.26	2.6	1.76	Protein 4.2 OS=Homo sapiens OX=9606 GN=EPB42 PE=1 SV=3
S4R460|S4R460_HUMAN	1050000	1710000	1280000	1330000	1340000	1210000	1	1.64	1.22	1.27	1.28	1.15	Immunoglobulin heavy variable 3/OR16-9 (non-functional) OS=Homo sapiens OX=9606 GN=IGHV3OR16-9 PE=1 SV=2
sp|P23083|HV102_HUMAN	56700000	57900000	47500000	49200000	46200000	47900000	1	1.02	0.84	0.87	0.82	0.85	Immunoglobulin heavy variable 1-2 OS=Homo sapiens OX=9606 GN=IGHV1-2 PE=1 SV=2
sp|A0A0J9YXX1|HV5X1_HUMAN	31800000	117000000	62200000	47700000	27100000	117000000	1	3.68	1.96	1.5	0.85	3.68	Immunoglobulin heavy variable 5-10-1 OS=Homo sapiens OX=9606 GN=IGHV5-10-1 PE=3 SV=1
sp|A0A075B6K4|LV310_HUMAN	20400000	23300000	29500000	21000000	20600000	26800000	1	1.14	1.44	1.03	1.01	1.31	Immunoglobulin lambda variable 3-10 OS=Homo sapiens OX=9606 GN=IGLV3-10 PE=3 SV=2
G3V4U0|G3V4U0_HUMAN	5220000	5000000	5520000	3470000	4970000	3890000	1	0.96	1.06	0.67	0.95	0.74	Fibulin-5 OS=Homo sapiens OX=9606 GN=FBLN5 PE=1 SV=1
sp|Q9UBX5|FBLN5_HUMAN	5220000	5000000	5520000	3470000	4970000	3890000	1	0.96	1.06	0.67	0.95	0.74	Fibulin-5 OS=Homo sapiens OX=9606 GN=FBLN5 PE=1 SV=1
sp|Q13103|SPP24_HUMAN	4100000	5100000	4720000	3930000	7780000	5370000	1	1.24	1.15	0.96	1.9	1.31	Secreted phosphoprotein 24 OS=Homo sapiens OX=9606 GN=SPP2 PE=1 SV=1
K7ERI9|K7ERI9_HUMAN	864000000	1030000000	686000000	1090000000	1020000000	756000000	1	1.19	0.79	1.26	1.18	0.87	Apolipoprotein C-I (Fragment) OS=Homo sapiens OX=9606 GN=APOC1 PE=1 SV=1
sp|P02654|APOC1_HUMAN	864000000	1030000000	686000000	1090000000	1020000000	756000000	1	1.19	0.79	1.26	1.18	0.87	Apolipoprotein C-I OS=Homo sapiens OX=9606 GN=APOC1 PE=1 SV=1
sp|P63104|1433Z_HUMAN	5910000	7020000	4570000	7240000	4230000	3850000	1	1.19	0.77	1.23	0.72	0.65	14-3-3 protein zeta/delta OS=Homo sapiens OX=9606 GN=YWHAZ PE=1 SV=1
E7EX29|E7EX29_HUMAN	5910000	7020000	4570000	7240000	4230000	3850000	1	1.19	0.77	1.23	0.72	0.65	14-3-3 protein zeta/delta (Fragment) OS=Homo sapiens OX=9606 GN=YWHAZ PE=1 SV=1
E9PNE6|E9PNE6_HUMAN	1430000	1580000	1360000	1340000	1620000	1500000	1	1.1	0.95	0.94	1.13	1.05	Heat shock cognate 71 kDa protein OS=Homo sapiens OX=9606 GN=HSPA8 PE=1 SV=1
E9PKE3|E9PKE3_HUMAN	1430000	1580000	1360000	1340000	1620000	1500000	1	1.1	0.95	0.94	1.13	1.05	Heat shock cognate 71 kDa protein OS=Homo sapiens OX=9606 GN=HSPA8 PE=1 SV=1
sp|P11142|HSP7C_HUMAN	1430000	1580000	1360000	1340000	1620000	1500000	1	1.1	0.95	0.94	1.13	1.05	Heat shock cognate 71 kDa protein OS=Homo sapiens OX=9606 GN=HSPA8 PE=1 SV=1
sp|P02786|TFR1_HUMAN	3200000	4140000	3320000	2920000	3710000	3150000	1	1.3	1.04	0.91	1.16	0.98	Transferrin receptor protein 1 OS=Homo sapiens OX=9606 GN=TFRC PE=1 SV=2
G3V0E5|G3V0E5_HUMAN	3200000	4140000	3320000	2920000	3710000	3150000	1	1.3	1.04	0.91	1.16	0.98	Transferrin receptor protein 1 OS=Homo sapiens OX=9606 GN=TFRC PE=1 SV=1
sp|Q8WWZ8|OIT3_HUMAN	3960000	5710000	3980000	4880000	4530000	4600000	1	1.44	1	1.23	1.14	1.16	Oncoprotein-induced transcript 3 protein OS=Homo sapiens OX=9606 GN=OIT3 PE=1 SV=2
sp|P00742|FA10_HUMAN	3500000	4440000	3840000	3540000	4740000	4360000	1	1.27	1.1	1.01	1.35	1.24	Coagulation factor X OS=Homo sapiens OX=9606 GN=F10 PE=1 SV=2
A0A182DWH7|A0A182DWH7_HUMAN	33800000	41700000	32300000	33400000	45500000	34600000	1	1.24	0.96	0.99	1.35	1.02	Selenoprotein P (Fragment) OS=Homo sapiens OX=9606 GN=SELENOP PE=1 SV=1
sp|P49908|SEPP1_HUMAN	33800000	41700000	32300000	33400000	45500000	34600000	1	1.24	0.96	0.99	1.35	1.02	Selenoprotein P OS=Homo sapiens OX=9606 GN=SELENOP PE=1 SV=3
sp|P11597|CETP_HUMAN	5620000	7870000	7470000	5730000	4550000	7020000	1	1.4	1.33	1.02	0.81	1.25	Cholesteryl ester transfer protein OS=Homo sapiens OX=9606 GN=CETP PE=1 SV=2
sp|Q9Y4G6|TLN2_HUMAN	349000	486000	374000	369000	389000	374000	1	1.4	1.07	1.06	1.12	1.07	Talin-2 OS=Homo sapiens OX=9606 GN=TLN2 PE=1 SV=4
sp|A0A075B6K5|LV39_HUMAN	78100000	95100000	68500000	62000000	62200000	62100000	1	1.22	0.88	0.79	0.8	0.8	Immunoglobulin lambda variable 3-9 OS=Homo sapiens OX=9606 GN=IGLV3-9 PE=3 SV=1
J3KRP0|J3KRP0_HUMAN	1880000	3260000	2720000	3430000	4100000	3320000	1	1.74	1.45	1.83	2.18	1.77	Beta-Ala-His dipeptidase OS=Homo sapiens OX=9606 GN=CNDP1 PE=1 SV=2
sp|Q96KN2|CNDP1_HUMAN	1880000	3260000	2720000	3430000	4100000	3320000	1	1.74	1.45	1.83	2.18	1.77	Beta-Ala-His dipeptidase OS=Homo sapiens OX=9606 GN=CNDP1 PE=1 SV=4
A0A0A0MSI0|A0A0A0MSI0_HUMAN	2360000	2430000	2370000	2340000	3350000	2410000	1	1.03	1.01	0.99	1.42	1.02	Peroxiredoxin-1 (Fragment) OS=Homo sapiens OX=9606 GN=PRDX1 PE=1 SV=1
sp|Q06830|PRDX1_HUMAN	2360000	2430000	2370000	2340000	3350000	2410000	1	1.03	1.01	0.99	1.42	1.02	Peroxiredoxin-1 OS=Homo sapiens OX=9606 GN=PRDX1 PE=1 SV=1
sp|P01742|HV169_HUMAN	43100000	68400000	33200000	114000000	74400000	78300000	1	1.59	0.77	2.65	1.73	1.82	Immunoglobulin heavy variable 1-69 OS=Homo sapiens OX=9606 GN=IGHV1-69 PE=1 SV=2
sp|P02452|CO1A1_HUMAN	62700000	32600000	62600000	14400000	7680000	7640000	1	0.52	1	0.23	0.12	0.12	Collagen alpha-1(I) chain OS=Homo sapiens OX=9606 GN=COL1A1 PE=1 SV=5
sp|Q15485|FCN2_HUMAN	75100000	57500000	39700000	26900000	58800000	41900000	1	0.77	0.53	0.36	0.78	0.56	Ficolin-2 OS=Homo sapiens OX=9606 GN=FCN2 PE=1 SV=2
sp|P08571|CD14_HUMAN	14200000	12200000	12900000	11500000	10200000	10200000	1	0.86	0.91	0.81	0.72	0.72	Monocyte differentiation antigen CD14 OS=Homo sapiens OX=9606 GN=CD14 PE=1 SV=2
A0A087WWU8|A0A087WWU8_HUMAN	1150000	1430000	1010000	1260000	1820000	1670000	1	1.24	0.88	1.1	1.58	1.45	Tropomyosin alpha-3 chain OS=Homo sapiens OX=9606 GN=TPM3 PE=1 SV=1
sp|Q4LDE5|SVEP1_HUMAN	1980000	1640000	1620000	1560000	1680000	1450000	1	0.83	0.82	0.79	0.85	0.73	Sushi von Willebrand factor type A EGF and pentraxin domain-containing protein 1 OS=Homo sapiens OX=9606 GN=SVEP1 PE=1 SV=3
A0A0A0MSD0|A0A0A0MSD0_HUMAN	1980000	1640000	1620000	1560000	1680000	1450000	1	0.83	0.82	0.79	0.85	0.73	Sushi von Willebrand factor type A EGF and pentraxin domain-containing protein 1 OS=Homo sapiens OX=9606 GN=SVEP1 PE=1 SV=1
sp|Q9Y6Z7|COL10_HUMAN	2880000	2530000	3530000	3170000	3590000	4000000	1	0.88	1.23	1.1	1.25	1.39	Collectin-10 OS=Homo sapiens OX=9606 GN=COLEC10 PE=1 SV=2
sp|P31947|1433S_HUMAN	6980000	6400000	5320000	12800000	417000	930000	1	0.92	0.76	1.83	0.06	0.13	14-3-3 protein sigma OS=Homo sapiens OX=9606 GN=SFN PE=1 SV=1
sp|A0A0B4J1V0|HV315_HUMAN	22700000	35500000	18400000	17100000	16400000	14200000	1	1.56	0.81	0.75	0.72	0.62	Immunoglobulin heavy variable 3-15 OS=Homo sapiens OX=9606 GN=IGHV3-15 PE=3 SV=1
sp|P16157|ANK1_HUMAN	2630000	3270000	2600000	3510000	8120000	5740000	1	1.24	0.99	1.33	3.09	2.18	Ankyrin-1 OS=Homo sapiens OX=9606 GN=ANK1 PE=1 SV=3
A0A2Q2TTZ9|A0A2Q2TTZ9_HUMAN	37200000	42700000	36000000	54900000	40600000	40800000	1	1.15	0.97	1.48	1.09	1.1	Immunoglobulin kappa variable 1-33 OS=Homo sapiens OX=9606 GN=IGKV1D-33 PE=1 SV=1
A0A075B7B8|A0A075B7B8_HUMAN	13900000	13900000	14500000	17600000	14400000	19600000	1	1	1.04	1.26	1.04	1.41	Immunoglobulin heavy variable 3/OR16-12 (non-functional) (Fragment) OS=Homo sapiens OX=9606 GN=IGHV3OR16-12 PE=1 SV=1
sp|P69891|HBG1_HUMAN	2640000	3330000	3460000	5990000	3100000	3220000	1	1.26	1.31	2.27	1.17	1.22	Hemoglobin subunit gamma-1 OS=Homo sapiens OX=9606 GN=HBG1 PE=1 SV=2
A0A2R8Y7X9|A0A2R8Y7X9_HUMAN	2640000	3330000	3460000	5990000	3100000	3220000	1	1.26	1.31	2.27	1.17	1.22	GLOBIN domain-containing protein OS=Homo sapiens OX=9606 PE=3 SV=1
A0A7P0Z484|A0A7P0Z484_HUMAN	26700000	19200000	29700000	22600000	7080000	8080000	1	0.72	1.11	0.85	0.27	0.3	Calnexin OS=Homo sapiens OX=9606 GN=CANX PE=4 SV=1
A0A7P0T9L0|A0A7P0T9L0_HUMAN	26700000	19200000	29700000	22600000	7080000	8080000	1	0.72	1.11	0.85	0.27	0.3	Calnexin OS=Homo sapiens OX=9606 GN=CANX PE=4 SV=1
A0A7P0T8G1|A0A7P0T8G1_HUMAN	26700000	19200000	29700000	22600000	7080000	8080000	1	0.72	1.11	0.85	0.27	0.3	Calnexin OS=Homo sapiens OX=9606 GN=CANX PE=4 SV=1
A0A7P0T937|A0A7P0T937_HUMAN	26700000	19200000	29700000	22600000	7080000	8080000	1	0.72	1.11	0.85	0.27	0.3	Calnexin OS=Homo sapiens OX=9606 GN=CANX PE=4 SV=1
sp|P27824|CALX_HUMAN	26700000	19200000	29700000	22600000	7080000	8080000	1	0.72	1.11	0.85	0.27	0.3	Calnexin OS=Homo sapiens OX=9606 GN=CANX PE=1 SV=2
A0A7P0T840|A0A7P0T840_HUMAN	26700000	19200000	29700000	22600000	7080000	8080000	1	0.72	1.11	0.85	0.27	0.3	Calnexin OS=Homo sapiens OX=9606 GN=CANX PE=4 SV=1
A0A7P0TAE9|A0A7P0TAE9_HUMAN	26700000	19200000	29700000	22600000	7080000	8080000	1	0.72	1.11	0.85	0.27	0.3	Calnexin OS=Homo sapiens OX=9606 GN=CANX PE=4 SV=1
A0A7P0TB65|A0A7P0TB65_HUMAN	26700000	19200000	29700000	22600000	7080000	8080000	1	0.72	1.11	0.85	0.27	0.3	Calnexin OS=Homo sapiens OX=9606 GN=CANX PE=4 SV=1
A0A7P0TAR9|A0A7P0TAR9_HUMAN	26700000	19200000	29700000	22600000	7080000	8080000	1	0.72	1.11	0.85	0.27	0.3	Calnexin OS=Homo sapiens OX=9606 GN=CANX PE=4 SV=1
A0A7P0Z4D6|A0A7P0Z4D6_HUMAN	26700000	19200000	29700000	22600000	7080000	8080000	1	0.72	1.11	0.85	0.27	0.3	Calnexin OS=Homo sapiens OX=9606 GN=CANX PE=4 SV=1
sp|Q15582|BGH3_HUMAN	3800000	4320000	4490000	4530000	4810000	4980000	1	1.14	1.18	1.19	1.26	1.31	Transforming growth factor-beta-induced protein ig-h3 OS=Homo sapiens OX=9606 GN=TGFBI PE=1 SV=1
E7ESV4|E7ESV4_HUMAN	1590000	2190000	1550000	1130000	1620000	1980000	1	1.38	0.97	0.71	1.02	1.24	Ras-related protein Rap-1b (Fragment) OS=Homo sapiens OX=9606 GN=RAP1B PE=1 SV=1
F5H7Y6|F5H7Y6_HUMAN	1590000	2190000	1550000	1130000	1620000	1980000	1	1.38	0.97	0.71	1.02	1.24	Ras-related protein Rap-1b OS=Homo sapiens OX=9606 GN=RAP1B PE=1 SV=1
sp|P61224|RAP1B_HUMAN	1590000	2190000	1550000	1130000	1620000	1980000	1	1.38	0.97	0.71	1.02	1.24	Ras-related protein Rap-1b OS=Homo sapiens OX=9606 GN=RAP1B PE=1 SV=1
sp|P30101|PDIA3_HUMAN	67700000	48700000	63600000	59600000	9280000	13200000	1	0.72	0.94	0.88	0.14	0.19	Protein disulfide-isomerase A3 OS=Homo sapiens OX=9606 GN=PDIA3 PE=1 SV=4
sp|P0DMV8|HS71A_HUMAN	5220000	3720000	4990000	4660000	1360000	1260000	1	0.71	0.96	0.89	0.26	0.24	Heat shock 70 kDa protein 1A OS=Homo sapiens OX=9606 GN=HSPA1A PE=1 SV=1
sp|P0DMV9|HS71B_HUMAN	5220000	3720000	4990000	4660000	1360000	1260000	1	0.71	0.96	0.89	0.26	0.24	Heat shock 70 kDa protein 1B OS=Homo sapiens OX=9606 GN=HSPA1B PE=1 SV=1
A0A0G2JIW1|A0A0G2JIW1_HUMAN	5220000	3720000	4990000	4660000	1360000	1260000	1	0.71	0.96	0.89	0.26	0.24	Heat shock 70 kDa protein 1B OS=Homo sapiens OX=9606 GN=HSPA1B PE=1 SV=1
sp|P14151|LYAM1_HUMAN	8990000	14100000	11000000	9040000	9290000	9320000	1	1.57	1.23	1.01	1.03	1.04	L-selectin OS=Homo sapiens OX=9606 GN=SELL PE=1 SV=2
A0A5H1ZRS9|A0A5H1ZRS9_HUMAN	537000	841000	694000	784000	950000	872000	1	1.57	1.29	1.46	1.77	1.62	Immunoglobulin kappa variable 2D-29 OS=Homo sapiens OX=9606 GN=IGKV2D-29 PE=1 SV=1
sp|A0A075B6S2|KVD29_HUMAN	537000	841000	694000	784000	950000	872000	1	1.57	1.29	1.46	1.77	1.62	Immunoglobulin kappa variable 2D-29 OS=Homo sapiens OX=9606 GN=IGKV2D-29 PE=3 SV=1
sp|A2NJV5|KV229_HUMAN	537000	841000	694000	784000	950000	872000	1	1.57	1.29	1.46	1.77	1.62	Immunoglobulin kappa variable 2-29 OS=Homo sapiens OX=9606 GN=IGKV2-29 PE=3 SV=2
sp|O00602|FCN1_HUMAN	4390000	5770000	4930000	4700000	7310000	5450000	1	1.31	1.12	1.07	1.67	1.24	Ficolin-1 OS=Homo sapiens OX=9606 GN=FCN1 PE=1 SV=2
sp|P15814|IGLL1_HUMAN	238000	387000	265000	287000	325000	327000	1	1.62	1.11	1.21	1.37	1.37	Immunoglobulin lambda-like polypeptide 1 OS=Homo sapiens OX=9606 GN=IGLL1 PE=1 SV=1
sp|Q15166|PON3_HUMAN	1770000	2020000	2290000	1610000	2390000	2180000	1	1.14	1.29	0.91	1.35	1.23	Serum paraoxonase/lactonase 3 OS=Homo sapiens OX=9606 GN=PON3 PE=1 SV=3
sp|A0A0C4DH25|KVD20_HUMAN	36500000	43300000	33500000	44200000	34200000	56100000	1	1.19	0.92	1.21	0.94	1.54	Immunoglobulin kappa variable 3D-20 OS=Homo sapiens OX=9606 GN=IGKV3D-20 PE=3 SV=1
sp|P01743|HV146_HUMAN	995000	953000	1040000	1030000	1010000	919000	1	0.96	1.04	1.03	1.01	0.92	Immunoglobulin heavy variable 1-46 OS=Homo sapiens OX=9606 GN=IGHV1-46 PE=1 SV=2
sp|Q9UK55|ZPI_HUMAN	4280000	4850000	4850000	4400000	5310000	4640000	1	1.13	1.13	1.03	1.24	1.09	Protein Z-dependent protease inhibitor OS=Homo sapiens OX=9606 GN=SERPINA10 PE=1 SV=1
G3V2W1|G3V2W1_HUMAN	4280000	4850000	4850000	4400000	5310000	4640000	1	1.13	1.13	1.03	1.24	1.09	Protein Z-dependent protease inhibitor OS=Homo sapiens OX=9606 GN=SERPINA10 PE=1 SV=1
sp|A0A0C4DH35|HV335_HUMAN	9330000	9190000	8890000	11300000	11900000	11500000	1	0.99	0.95	1.22	1.28	1.24	Probable non-functional immunoglobulin heavy variable 3-35 OS=Homo sapiens OX=9606 GN=IGHV3-35 PE=1 SV=1
sp|P03950|ANGI_HUMAN	5750000	6290000	6960000	8710000	6740000	7190000	1	1.09	1.21	1.51	1.17	1.25	Angiogenin OS=Homo sapiens OX=9606 GN=ANG PE=1 SV=1
A0A075B7D0|A0A075B7D0_HUMAN	16700000	41900000	24700000	31300000	28200000	31500000	1	2.51	1.48	1.88	1.69	1.89	Immunoglobulin heavy variable 1/OR15-1 (non-functional) (Fragment) OS=Homo sapiens OX=9606 GN=IGHV1OR15-1 PE=1 SV=1
sp|Q92954|PRG4_HUMAN	12500000	13100000	13900000	10800000	13600000	9400000	1	1.05	1.11	0.87	1.09	0.75	Proteoglycan 4 OS=Homo sapiens OX=9606 GN=PRG4 PE=1 SV=3
A0A0C4DFP6|A0A0C4DFP6_HUMAN	6040000	5960000	5950000	4900000	5030000	5190000	1	0.99	0.99	0.81	0.83	0.86	Cartilage acidic protein 1 OS=Homo sapiens OX=9606 GN=CRTAC1 PE=1 SV=1
sp|Q9NQ79|CRAC1_HUMAN	6040000	5960000	5950000	4900000	5030000	5190000	1	0.99	0.99	0.81	0.83	0.86	Cartilage acidic protein 1 OS=Homo sapiens OX=9606 GN=CRTAC1 PE=1 SV=2
sp|P05109|S10A8_HUMAN	7880000	11000000	7830000	8820000	8330000	7320000	1	1.4	0.99	1.12	1.06	0.93	Protein S100-A8 OS=Homo sapiens OX=9606 GN=S100A8 PE=1 SV=1
sp|Q14525|KT33B_HUMAN	470000	759000	660000	695000	1590000	485000	1	1.61	1.4	1.48	3.39	1.03	Keratin type I cuticular Ha3-II OS=Homo sapiens OX=9606 GN=KRT33B PE=1 SV=3
sp|P01825|HV459_HUMAN	60800000	124000000	79800000	102000000	77500000	84300000	1	2.05	1.31	1.68	1.28	1.39	Immunoglobulin heavy variable 4-59 OS=Homo sapiens OX=9606 GN=IGHV4-59 PE=1 SV=2
sp|P0DP08|HVD82_HUMAN	60800000	124000000	79800000	102000000	77500000	84300000	1	2.05	1.31	1.68	1.28	1.39	Immunoglobulin heavy variable 4-38-2 OS=Homo sapiens OX=9606 GN=IGHV4-38-2 PE=3 SV=1
sp|A0A0C4DH41|HV461_HUMAN	60800000	124000000	79800000	102000000	77500000	84300000	1	2.05	1.31	1.68	1.28	1.39	Immunoglobulin heavy variable 4-61 OS=Homo sapiens OX=9606 GN=IGHV4-61 PE=3 SV=1
sp|P0DP06|HVD34_HUMAN	60800000	124000000	79800000	102000000	77500000	84300000	1	2.05	1.31	1.68	1.28	1.39	Immunoglobulin heavy variable 4-30-4 OS=Homo sapiens OX=9606 GN=IGHV4-30-4 PE=3 SV=1
sp|P06331|HV434_HUMAN	60800000	124000000	79800000	102000000	77500000	84300000	1	2.05	1.31	1.68	1.28	1.39	Immunoglobulin heavy variable 4-34 OS=Homo sapiens OX=9606 GN=IGHV4-34 PE=1 SV=2
sp|P01824|HV439_HUMAN	60800000	124000000	79800000	102000000	77500000	84300000	1	2.05	1.31	1.68	1.28	1.39	Immunoglobulin heavy variable 4-39 OS=Homo sapiens OX=9606 GN=IGHV4-39 PE=1 SV=2
sp|P06702|S10A9_HUMAN	8120000	6720000	6610000	9070000	4120000	4030000	1	0.83	0.81	1.12	0.51	0.5	Protein S100-A9 OS=Homo sapiens OX=9606 GN=S100A9 PE=1 SV=1
H0Y512|H0Y512_HUMAN	2550000	3860000	3070000	2460000	6360000	2730000	1	1.51	1.2	0.96	2.49	1.07	Adipocyte plasma membrane-associated protein (Fragment) OS=Homo sapiens OX=9606 GN=APMAP PE=1 SV=1
sp|Q9HDC9|APMAP_HUMAN	2550000	3860000	3070000	2460000	6360000	2730000	1	1.51	1.2	0.96	2.49	1.07	Adipocyte plasma membrane-associated protein OS=Homo sapiens OX=9606 GN=APMAP PE=1 SV=2
sp|Q9NZP8|C1RL_HUMAN	5770000	8700000	6190000	5490000	5890000	5420000	1	1.51	1.07	0.95	1.02	0.94	Complement C1r subcomponent-like protein OS=Homo sapiens OX=9606 GN=C1RL PE=1 SV=2
sp|A0A0B4J1Y8|LV949_HUMAN	14000000	44800000	10900000	16500000	15300000	21400000	1	3.19	0.78	1.17	1.09	1.52	Immunoglobulin lambda variable 9-49 OS=Homo sapiens OX=9606 GN=IGLV9-49 PE=1 SV=1
sp|Q13201|MMRN1_HUMAN	4000000	6440000	5110000	4120000	3930000	5000000	1	1.61	1.28	1.03	0.98	1.25	Multimerin-1 OS=Homo sapiens OX=9606 GN=MMRN1 PE=1 SV=3
sp|A0A0C4DH29|HV103_HUMAN	2620000	5070000	2810000	3630000	3320000	4180000	1	1.94	1.07	1.39	1.27	1.59	Immunoglobulin heavy variable 1-3 OS=Homo sapiens OX=9606 GN=IGHV1-3 PE=3 SV=1
sp|Q8WWA0|ITLN1_HUMAN	4010000	3340000	3950000	3010000	2690000	3040000	1	0.83	0.98	0.75	0.67	0.76	Intelectin-1 OS=Homo sapiens OX=9606 GN=ITLN1 PE=1 SV=1
D6RGG3|D6RGG3_HUMAN	13200000	7500000	10700000	7530000	3260000	2540000	1	0.57	0.81	0.57	0.25	0.19	Collagen alpha-1(XII) chain OS=Homo sapiens OX=9606 GN=COL12A1 PE=1 SV=1
sp|Q99715|COCA1_HUMAN	13200000	7500000	10700000	7530000	3260000	2540000	1	0.57	0.81	0.57	0.25	0.19	Collagen alpha-1(XII) chain OS=Homo sapiens OX=9606 GN=COL12A1 PE=1 SV=2
F8WF14|F8WF14_HUMAN	8220000	3770000	5600000	3790000	3330000	4060000	1	0.46	0.68	0.46	0.41	0.49	Carboxylic ester hydrolase OS=Homo sapiens OX=9606 GN=BCHE PE=1 SV=1
sp|P06276|CHLE_HUMAN	8220000	3770000	5600000	3790000	3330000	4060000	1	0.46	0.68	0.46	0.41	0.49	Cholinesterase OS=Homo sapiens OX=9606 GN=BCHE PE=1 SV=1
sp|Q13093|PAFA_HUMAN	3560000	3830000	3510000	6270000	6650000	3770000	1	1.07	0.99	1.76	1.87	1.06	Platelet-activating factor acetylhydrolase OS=Homo sapiens OX=9606 GN=PLA2G7 PE=1 SV=1
sp|P61626|LYSC_HUMAN	14100000	19700000	17300000	20900000	13400000	19700000	1	1.39	1.23	1.48	0.95	1.4	Lysozyme C OS=Homo sapiens OX=9606 GN=LYZ PE=1 SV=1
sp|P55058|PLTP_HUMAN	8610000	7570000	9100000	9400000	8880000	9310000	1	0.88	1.06	1.09	1.03	1.08	Phospholipid transfer protein OS=Homo sapiens OX=9606 GN=PLTP PE=1 SV=1
sp|P81605|DCD_HUMAN	16500000	15200000	11700000	10500000	19800000	11500000	1	0.92	0.71	0.64	1.2	0.7	Dermcidin OS=Homo sapiens OX=9606 GN=DCD PE=1 SV=2
sp|O95445|APOM_HUMAN	110000000	102000000	97500000	118000000	215000000	79500000	1	0.93	0.88	1.07	1.95	0.72	Apolipoprotein M OS=Homo sapiens OX=9606 GN=APOM PE=1 SV=2
sp|A0A0A0MRZ8|KVD11_HUMAN	121000000	173000000	145000000	158000000	133000000	152000000	1	1.43	1.2	1.3	1.1	1.26	Immunoglobulin kappa variable 3D-11 OS=Homo sapiens OX=9606 GN=IGKV3D-11 PE=3 SV=6
sp|P04433|KV311_HUMAN	121000000	173000000	145000000	158000000	133000000	152000000	1	1.43	1.2	1.3	1.1	1.26	Immunoglobulin kappa variable 3-11 OS=Homo sapiens OX=9606 GN=IGKV3-11 PE=1 SV=1
sp|Q9P2E9|RRBP1_HUMAN	6530000	4640000	6720000	5540000	1190000	763000	1	0.71	1.03	0.85	0.18	0.12	Ribosome-binding protein 1 OS=Homo sapiens OX=9606 GN=RRBP1 PE=1 SV=5
sp|P27105|STOM_HUMAN	2830000	2750000	2400000	2980000	6520000	5150000	1	0.97	0.85	1.05	2.3	1.82	Stomatin OS=Homo sapiens OX=9606 GN=STOM PE=1 SV=3
sp|P01700|LV147_HUMAN	28600000	43300000	24100000	33000000	29700000	35700000	1	1.51	0.84	1.15	1.04	1.25	Immunoglobulin lambda variable 1-47 OS=Homo sapiens OX=9606 GN=IGLV1-47 PE=1 SV=2
sp|P15311|EZRI_HUMAN	4350000	4340000	4610000	5000000	1620000	1370000	1	1	1.06	1.15	0.37	0.31	Ezrin OS=Homo sapiens OX=9606 GN=EZR PE=1 SV=4
E7EQR4|E7EQR4_HUMAN	4350000	4340000	4610000	5000000	1620000	1370000	1	1	1.06	1.15	0.37	0.31	Ezrin OS=Homo sapiens OX=9606 GN=EZR PE=1 SV=3
sp|A0A075B6J9|LV218_HUMAN	5830000	5820000	5660000	5760000	7570000	7030000	1	1	0.97	0.99	1.3	1.21	Immunoglobulin lambda variable 2-18 OS=Homo sapiens OX=9606 GN=IGLV2-18 PE=3 SV=2
sp|Q15424|SAFB1_HUMAN	14800000	8990000	14800000	9970000	1360000	1980000	1	0.61	1	0.68	0.09	0.13	Scaffold attachment factor B1 OS=Homo sapiens OX=9606 GN=SAFB PE=1 SV=4
sp|Q08830|FGL1_HUMAN	1380000	1960000	1330000	1980000	5470000	2210000	1	1.42	0.97	1.43	3.96	1.6	Fibrinogen-like protein 1 OS=Homo sapiens OX=9606 GN=FGL1 PE=1 SV=3
H7BZ94|H7BZ94_HUMAN	8780000	7260000	7320000	9240000	2180000	2230000	1	0.83	0.83	1.05	0.25	0.25	Protein disulfide-isomerase OS=Homo sapiens OX=9606 GN=P4HB PE=1 SV=2
A0A7P0TA97|A0A7P0TA97_HUMAN	8780000	7260000	7320000	9240000	2180000	2230000	1	0.83	0.83	1.05	0.25	0.25	Protein disulfide-isomerase OS=Homo sapiens OX=9606 GN=P4HB PE=4 SV=1
H0Y3Z3|H0Y3Z3_HUMAN	8780000	7260000	7320000	9240000	2180000	2230000	1	0.83	0.83	1.05	0.25	0.25	Protein disulfide-isomerase OS=Homo sapiens OX=9606 GN=P4HB PE=1 SV=2
A0A7P0T8C0|A0A7P0T8C0_HUMAN	8780000	7260000	7320000	9240000	2180000	2230000	1	0.83	0.83	1.05	0.25	0.25	Protein disulfide-isomerase OS=Homo sapiens OX=9606 GN=P4HB PE=4 SV=1
sp|P07237|PDIA1_HUMAN	8780000	7260000	7320000	9240000	2180000	2230000	1	0.83	0.83	1.05	0.25	0.25	Protein disulfide-isomerase OS=Homo sapiens OX=9606 GN=P4HB PE=1 SV=3
A0A7P0TB26|A0A7P0TB26_HUMAN	8780000	7260000	7320000	9240000	2180000	2230000	1	0.83	0.83	1.05	0.25	0.25	Protein disulfide-isomerase OS=Homo sapiens OX=9606 GN=P4HB PE=4 SV=1
A0A7P0TA35|A0A7P0TA35_HUMAN	8780000	7260000	7320000	9240000	2180000	2230000	1	0.83	0.83	1.05	0.25	0.25	Protein disulfide-isomerase OS=Homo sapiens OX=9606 GN=P4HB PE=4 SV=1
A0A7P0TA71|A0A7P0TA71_HUMAN	8780000	7260000	7320000	9240000	2180000	2230000	1	0.83	0.83	1.05	0.25	0.25	Protein disulfide-isomerase OS=Homo sapiens OX=9606 GN=P4HB PE=4 SV=1
I3L0S0|I3L0S0_HUMAN	8780000	7260000	7320000	9240000	2180000	2230000	1	0.83	0.83	1.05	0.25	0.25	Protein disulfide-isomerase OS=Homo sapiens OX=9606 GN=P4HB PE=1 SV=2
A0A7P0T8J3|A0A7P0T8J3_HUMAN	8780000	7260000	7320000	9240000	2180000	2230000	1	0.83	0.83	1.05	0.25	0.25	Protein disulfide-isomerase OS=Homo sapiens OX=9606 GN=P4HB PE=4 SV=1
I3L4M2|I3L4M2_HUMAN	8780000	7260000	7320000	9240000	2180000	2230000	1	0.83	0.83	1.05	0.25	0.25	Protein disulfide-isomerase OS=Homo sapiens OX=9606 GN=P4HB PE=1 SV=2
A0A7P0T8X1|A0A7P0T8X1_HUMAN	8780000	7260000	7320000	9240000	2180000	2230000	1	0.83	0.83	1.05	0.25	0.25	Protein disulfide-isomerase OS=Homo sapiens OX=9606 GN=P4HB PE=4 SV=1
A6XND1|A6XND1_HUMAN	2120000	2470000	2370000	3880000	2560000	3420000	1	1.16	1.12	1.83	1.21	1.61	Insulin-like growth factor-binding protein 3 OS=Homo sapiens OX=9606 GN=IGFBP3 PE=1 SV=1
A6XND0|A6XND0_HUMAN	2120000	2470000	2370000	3880000	2560000	3420000	1	1.16	1.12	1.83	1.21	1.61	Insulin-like growth factor-binding protein 3 OS=Homo sapiens OX=9606 GN=IGFBP3 PE=1 SV=1
sp|P17936|IBP3_HUMAN	2120000	2470000	2370000	3880000	2560000	3420000	1	1.16	1.12	1.83	1.21	1.61	Insulin-like growth factor-binding protein 3 OS=Homo sapiens OX=9606 GN=IGFBP3 PE=1 SV=2
A0A075B7E8|A0A075B7E8_HUMAN	7290000	5650000	4690000	5230000	6380000	10300000	1	0.77	0.64	0.72	0.87	1.41	Immunoglobulin heavy variable 3/OR16-13 (non-functional) (Fragment) OS=Homo sapiens OX=9606 GN=IGHV3OR16-13 PE=1 SV=1
sp|Q02952|AKA12_HUMAN	7010000	9810000	6070000	10000000	2680000	2600000	1	1.4	0.87	1.43	0.38	0.37	A-kinase anchor protein 12 OS=Homo sapiens OX=9606 GN=AKAP12 PE=1 SV=4
sp|P18065|IBP2_HUMAN	3160000	3480000	2250000	2420000	3490000	2520000	1	1.1	0.71	0.77	1.1	0.8	Insulin-like growth factor-binding protein 2 OS=Homo sapiens OX=9606 GN=IGFBP2 PE=1 SV=2
sp|Q92496|FHR4_HUMAN	1330000	1130000	969000	1050000	1070000	1650000	1	0.85	0.73	0.79	0.81	1.24	Complement factor H-related protein 4 OS=Homo sapiens OX=9606 GN=CFHR4 PE=1 SV=3
A0A5H1ZRS2|A0A5H1ZRS2_HUMAN	407000	212000	164000	267000	193000	278000	1	0.52	0.4	0.66	0.48	0.68	Immunoglobulin kappa variable 2D-28 OS=Homo sapiens OX=9606 GN=IGKV2D-28 PE=1 SV=1
G3XAP6|G3XAP6_HUMAN	1210000	1120000	1240000	992000	1010000	1040000	1	0.93	1.03	0.82	0.84	0.86	Cartilage oligomeric matrix protein OS=Homo sapiens OX=9606 GN=COMP PE=1 SV=1
sp|P49747|COMP_HUMAN	1210000	1120000	1240000	992000	1010000	1040000	1	0.93	1.03	0.82	0.84	0.86	Cartilage oligomeric matrix protein OS=Homo sapiens OX=9606 GN=COMP PE=1 SV=2
A0A075B7D8|A0A075B7D8_HUMAN	6050000	5430000	5970000	7520000	5810000	8910000	1	0.9	0.99	1.24	0.96	1.47	Immunoglobulin heavy variable 3/OR15-7 (pseudogene) (Fragment) OS=Homo sapiens OX=9606 GN=IGHV3OR15-7 PE=1 SV=1
B7Z6Z4|B7Z6Z4_HUMAN	1920000	2150000	1160000	1110000	2010000	1930000	1	1.12	0.6	0.58	1.05	1	Myosin light polypeptide 6 OS=Homo sapiens OX=9606 GN=MYL6 PE=1 SV=1
J3KND3|J3KND3_HUMAN	1920000	2150000	1160000	1110000	2010000	1930000	1	1.12	0.6	0.58	1.05	1	Myosin light polypeptide 6 OS=Homo sapiens OX=9606 GN=MYL6 PE=1 SV=1
G8JLA2|G8JLA2_HUMAN	1920000	2150000	1160000	1110000	2010000	1930000	1	1.12	0.6	0.58	1.05	1	Myosin light polypeptide 6 OS=Homo sapiens OX=9606 GN=MYL6 PE=1 SV=1
F8W1R7|F8W1R7_HUMAN	1920000	2150000	1160000	1110000	2010000	1930000	1	1.12	0.6	0.58	1.05	1	Myosin light polypeptide 6 OS=Homo sapiens OX=9606 GN=MYL6 PE=1 SV=1
sp|P60660|MYL6_HUMAN	1920000	2150000	1160000	1110000	2010000	1930000	1	1.12	0.6	0.58	1.05	1	Myosin light polypeptide 6 OS=Homo sapiens OX=9606 GN=MYL6 PE=1 SV=2
G3V1V0|G3V1V0_HUMAN	1920000	2150000	1160000	1110000	2010000	1930000	1	1.12	0.6	0.58	1.05	1	Myosin light polypeptide 6 OS=Homo sapiens OX=9606 GN=MYL6 PE=1 SV=1
A0A7P0TAW3|A0A7P0TAW3_HUMAN	2550000	1850000	2340000	1990000	1880000	2150000	1	0.72	0.92	0.78	0.74	0.84	Transitional endoplasmic reticulum ATPase OS=Homo sapiens OX=9606 GN=VCP PE=4 SV=1
A0A7I2V540|A0A7I2V540_HUMAN	2550000	1850000	2340000	1990000	1880000	2150000	1	0.72	0.92	0.78	0.74	0.84	15S Mg(2+)-ATPase p97 subunit OS=Homo sapiens OX=9606 GN=VCP PE=1 SV=1
sp|P55072|TERA_HUMAN	2550000	1850000	2340000	1990000	1880000	2150000	1	0.72	0.92	0.78	0.74	0.84	Transitional endoplasmic reticulum ATPase OS=Homo sapiens OX=9606 GN=VCP PE=1 SV=4
A0A7P0T8Q5|A0A7P0T8Q5_HUMAN	2550000	1850000	2340000	1990000	1880000	2150000	1	0.72	0.92	0.78	0.74	0.84	Transitional endoplasmic reticulum ATPase OS=Homo sapiens OX=9606 GN=VCP PE=4 SV=1
A0A7P0T8A3|A0A7P0T8A3_HUMAN	2550000	1850000	2340000	1990000	1880000	2150000	1	0.72	0.92	0.78	0.74	0.84	Transitional endoplasmic reticulum ATPase OS=Homo sapiens OX=9606 GN=VCP PE=4 SV=1
C9JUP7|C9JUP7_HUMAN	2550000	1850000	2340000	1990000	1880000	2150000	1	0.72	0.92	0.78	0.74	0.84	15S Mg(2+)-ATPase p97 subunit OS=Homo sapiens OX=9606 GN=VCP PE=1 SV=2
sp|O00391|QSOX1_HUMAN	6250000	7300000	6750000	6810000	5990000	6130000	1	1.17	1.08	1.09	0.96	0.98	Sulfhydryl oxidase 1 OS=Homo sapiens OX=9606 GN=QSOX1 PE=1 SV=3
A0A0D9SF54|A0A0D9SF54_HUMAN	2770000	5470000	2840000	1800000	727000	1570000	1	1.98	1.03	0.65	0.26	0.57	Spectrin alpha chain non-erythrocytic 1 OS=Homo sapiens OX=9606 GN=SPTAN1 PE=1 SV=1
sp|Q13813|SPTN1_HUMAN	2770000	5470000	2840000	1800000	727000	1570000	1	1.98	1.03	0.65	0.26	0.57	Spectrin alpha chain non-erythrocytic 1 OS=Homo sapiens OX=9606 GN=SPTAN1 PE=1 SV=3
A0A0D9SGF6|A0A0D9SGF6_HUMAN	2770000	5470000	2840000	1800000	727000	1570000	1	1.98	1.03	0.65	0.26	0.57	Spectrin alpha chain non-erythrocytic 1 OS=Homo sapiens OX=9606 GN=SPTAN1 PE=1 SV=1
H7BYX6|H7BYX6_HUMAN	2180000	2380000	2490000	2940000	1470000	1690000	1	1.09	1.14	1.35	0.68	0.77	Neural cell adhesion molecule 1 OS=Homo sapiens OX=9606 GN=NCAM1 PE=1 SV=2
A0A087WTE4|A0A087WTE4_HUMAN	2180000	2380000	2490000	2940000	1470000	1690000	1	1.09	1.14	1.35	0.68	0.77	Neural cell adhesion molecule 1 OS=Homo sapiens OX=9606 GN=NCAM1 PE=1 SV=1
A0A087WTF6|A0A087WTF6_HUMAN	2180000	2380000	2490000	2940000	1470000	1690000	1	1.09	1.14	1.35	0.68	0.77	Neural cell adhesion molecule 1 OS=Homo sapiens OX=9606 GN=NCAM1 PE=1 SV=1
sp|P13591|NCAM1_HUMAN	2180000	2380000	2490000	2940000	1470000	1690000	1	1.09	1.14	1.35	0.68	0.77	Neural cell adhesion molecule 1 OS=Homo sapiens OX=9606 GN=NCAM1 PE=1 SV=3
A0A087WX77|A0A087WX77_HUMAN	2180000	2380000	2490000	2940000	1470000	1690000	1	1.09	1.14	1.35	0.68	0.77	Neural cell adhesion molecule 1 OS=Homo sapiens OX=9606 GN=NCAM1 PE=1 SV=1
A0A087WWD4|A0A087WWD4_HUMAN	2180000	2380000	2490000	2940000	1470000	1690000	1	1.09	1.14	1.35	0.68	0.77	Neural cell adhesion molecule 1 OS=Homo sapiens OX=9606 GN=NCAM1 PE=1 SV=1
A0A087WV75|A0A087WV75_HUMAN	2180000	2380000	2490000	2940000	1470000	1690000	1	1.09	1.14	1.35	0.68	0.77	Neural cell adhesion molecule 1 OS=Homo sapiens OX=9606 GN=NCAM1 PE=1 SV=1
sp|Q9BWP8|COL11_HUMAN	2900000	3470000	3620000	3370000	4790000	5200000	1	1.2	1.25	1.16	1.65	1.79	Collectin-11 OS=Homo sapiens OX=9606 GN=COLEC11 PE=1 SV=1
sp|A0A075B6H9|LV469_HUMAN	1960000	2280000	1460000	973000	911000	815000	1	1.16	0.74	0.5	0.46	0.41	Immunoglobulin lambda variable 4-69 OS=Homo sapiens OX=9606 GN=IGLV4-69 PE=1 SV=1
sp|Q09666|AHNK_HUMAN	10800000	7660000	9480000	7070000	1940000	1870000	1	0.71	0.87	0.65	0.18	0.17	Neuroblast differentiation-associated protein AHNAK OS=Homo sapiens OX=9606 GN=AHNAK PE=1 SV=2
sp|P01880|IGHD_HUMAN	9690000	12000000	6900000	12300000	3060000	4850000	1	1.24	0.71	1.27	0.32	0.5	Immunoglobulin heavy constant delta OS=Homo sapiens OX=9606 GN=IGHD PE=1 SV=3
A0A0A0MS09|A0A0A0MS09_HUMAN	9690000	12000000	6900000	12300000	3060000	4850000	1	1.24	0.71	1.27	0.32	0.5	Immunoglobulin heavy constant delta (Fragment) OS=Homo sapiens OX=9606 GN=IGHD PE=1 SV=1
sp|P01782|HV309_HUMAN	29800000	31900000	28400000	36200000	36300000	35900000	1	1.07	0.95	1.22	1.22	1.21	Immunoglobulin heavy variable 3-9 OS=Homo sapiens OX=9606 GN=IGHV3-9 PE=1 SV=2
sp|P0DP04|HV43D_HUMAN	29800000	31900000	28400000	36200000	36300000	35900000	1	1.07	0.95	1.22	1.22	1.21	Immunoglobulin heavy variable 3-43D OS=Homo sapiens OX=9606 GN=IGHV3-43D PE=3 SV=1
sp|Q8NC51|PAIRB_HUMAN	11600000	10300000	13100000	14300000	1940000	1860000	1	0.88	1.12	1.23	0.17	0.16	Plasminogen activator inhibitor 1 RNA-binding protein OS=Homo sapiens OX=9606 GN=SERBP1 PE=1 SV=2
sp|A0A075B6S6|KVD30_HUMAN	437000	835000	498000	675000	419000	499000	1	1.91	1.14	1.55	0.96	1.14	Immunoglobulin kappa variable 2D-30 OS=Homo sapiens OX=9606 GN=IGKV2D-30 PE=3 SV=1
sp|P15169|CBPN_HUMAN	3620000	4770000	3730000	3220000	2840000	2720000	1	1.32	1.03	0.89	0.78	0.75	Carboxypeptidase N catalytic chain OS=Homo sapiens OX=9606 GN=CPN1 PE=1 SV=1
sp|A0A0B4J1X8|HV343_HUMAN	4930000	7770000	5610000	6330000	6250000	5570000	1	1.58	1.14	1.28	1.27	1.13	Immunoglobulin heavy variable 3-43 OS=Homo sapiens OX=9606 GN=IGHV3-43 PE=3 SV=1
sp|A0A0B4J1U7|HV601_HUMAN	191000000	208000000	210000000	199000000	205000000	301000000	1	1.09	1.1	1.04	1.08	1.58	Immunoglobulin heavy variable 6-1 OS=Homo sapiens OX=9606 GN=IGHV6-1 PE=3 SV=1
sp|A0A0C4DH32|HV320_HUMAN	673000	1330000	807000	920000	1280000	743000	1	1.97	1.2	1.37	1.91	1.11	Immunoglobulin heavy variable 3-20 OS=Homo sapiens OX=9606 GN=IGHV3-20 PE=3 SV=2
sp|P14923|PLAK_HUMAN	5320000	6720000	5150000	4490000	6520000	6640000	1	1.26	0.97	0.84	1.23	1.25	Junction plakoglobin OS=Homo sapiens OX=9606 GN=JUP PE=1 SV=3
sp|P0DP01|HV108_HUMAN	290000	152000	105000	157000	115000	79400	1	0.52	0.36	0.54	0.39	0.27	Immunoglobulin heavy variable 1-8 OS=Homo sapiens OX=9606 GN=IGHV1-8 PE=3 SV=1
sp|A0A0J9YX35|HV64D_HUMAN	2140000	3050000	2720000	2700000	2850000	3580000	1	1.43	1.27	1.26	1.34	1.68	Immunoglobulin heavy variable 3-64D OS=Homo sapiens OX=9606 GN=IGHV3-64D PE=3 SV=1
sp|P54108|CRIS3_HUMAN	2870000	3620000	3230000	3350000	3050000	3300000	1	1.26	1.13	1.17	1.06	1.15	Cysteine-rich secretory protein 3 OS=Homo sapiens OX=9606 GN=CRISP3 PE=1 SV=1
J3KPA1|J3KPA1_HUMAN	2870000	3620000	3230000	3350000	3050000	3300000	1	1.26	1.13	1.17	1.06	1.15	Cysteine-rich secretory protein 3 OS=Homo sapiens OX=9606 GN=CRISP3 PE=1 SV=1
A0A669KB69|A0A669KB69_HUMAN	3850000	3940000	4690000	4800000	3880000	4430000	1	1.02	1.22	1.25	1.01	1.15	Apolipoprotein A-V OS=Homo sapiens OX=9606 GN=APOA5 PE=1 SV=1
sp|Q6Q788|APOA5_HUMAN	3850000	3940000	4690000	4800000	3880000	4430000	1	1.02	1.22	1.25	1.01	1.15	Apolipoprotein A-V OS=Homo sapiens OX=9606 GN=APOA5 PE=1 SV=1
sp|Q8N1N4|K2C78_HUMAN	635000	994000	548000	544000	1230000	878000	1	1.56	0.86	0.86	1.93	1.38	Keratin type II cytoskeletal 78 OS=Homo sapiens OX=9606 GN=KRT78 PE=1 SV=2
A0A087WT59|A0A087WT59_HUMAN	23300000	55100000	22100000	73000000	20900000	50500000	1	2.37	0.95	3.14	0.9	2.17	Transthyretin OS=Homo sapiens OX=9606 GN=TTR PE=1 SV=2
sp|P02766|TTHY_HUMAN	23300000	55100000	22100000	73000000	20900000	50500000	1	2.37	0.95	3.14	0.9	2.17	Transthyretin OS=Homo sapiens OX=9606 GN=TTR PE=1 SV=1
sp|Q9NYF8|BCLF1_HUMAN	1510000	1290000	1550000	1380000	975000	838000	1	0.85	1.02	0.92	0.65	0.55	Bcl-2-associated transcription factor 1 OS=Homo sapiens OX=9606 GN=BCLAF1 PE=1 SV=2
E9PK91|E9PK91_HUMAN	1510000	1290000	1550000	1380000	975000	838000	1	0.85	1.02	0.92	0.65	0.55	Bcl-2-associated transcription factor 1 OS=Homo sapiens OX=9606 GN=BCLAF1 PE=1 SV=1
sp|P49913|CAMP_HUMAN	7660000	8270000	7560000	8830000	9540000	7730000	1	1.08	0.99	1.15	1.25	1.01	Cathelicidin antimicrobial peptide OS=Homo sapiens OX=9606 GN=CAMP PE=1 SV=1
J3KNB4|J3KNB4_HUMAN	7660000	8270000	7560000	8830000	9540000	7730000	1	1.08	0.99	1.15	1.25	1.01	Antibacterial peptide FALL-39 OS=Homo sapiens OX=9606 GN=CAMP PE=1 SV=1
X6RLJ0|X6RLJ0_HUMAN	131000000	95300000	154000000	169000000	142000000	206000000	1	0.73	1.18	1.29	1.08	1.57	Complement C1q subcomponent subunit A (Fragment) OS=Homo sapiens OX=9606 GN=C1QA PE=1 SV=7
sp|P02745|C1QA_HUMAN	131000000	95300000	154000000	169000000	142000000	206000000	1	0.73	1.18	1.29	1.08	1.57	Complement C1q subcomponent subunit A OS=Homo sapiens OX=9606 GN=C1QA PE=1 SV=2
sp|O95428|PPN_HUMAN	2130000	3290000	2420000	2240000	2730000	3170000	1	1.54	1.14	1.05	1.28	1.49	Papilin OS=Homo sapiens OX=9606 GN=PAPLN PE=2 SV=4
H0Y755|H0Y755_HUMAN	1480000	2070000	1600000	1640000	1830000	1550000	1	1.4	1.08	1.11	1.24	1.05	Low affinity immunoglobulin gamma Fc region receptor III-A OS=Homo sapiens OX=9606 GN=FCGR3A PE=1 SV=3
sp|P08637|FCG3A_HUMAN	1480000	2070000	1600000	1640000	1830000	1550000	1	1.4	1.08	1.11	1.24	1.05	Low affinity immunoglobulin gamma Fc region receptor III-A OS=Homo sapiens OX=9606 GN=FCGR3A PE=1 SV=2
sp|A0A0C4DH24|KV621_HUMAN	873000	1170000	977000	1310000	1180000	1210000	1	1.34	1.12	1.49	1.35	1.39	Immunoglobulin kappa variable 6-21 OS=Homo sapiens OX=9606 GN=IGKV6-21 PE=3 SV=1
C9JEE0|C9JEE0_HUMAN	2080000	1710000	1910000	2070000	2720000	2280000	1	0.82	0.92	0.99	1.31	1.09	Immunoglobulin lambda-like polypeptide 1 (Fragment) OS=Homo sapiens OX=9606 GN=IGLL1 PE=1 SV=1
sp|Q05682|CALD1_HUMAN	16500000	28300000	9830000	26700000	2830000	4120000	1	1.71	0.6	1.62	0.17	0.25	Caldesmon OS=Homo sapiens OX=9606 GN=CALD1 PE=1 SV=3
sp|Q6UY14|ATL4_HUMAN	749000	760000	632000	513000	585000	632000	1	1.01	0.84	0.69	0.78	0.84	ADAMTS-like protein 4 OS=Homo sapiens OX=9606 GN=ADAMTSL4 PE=1 SV=2
A0A669KBE7|A0A669KBE7_HUMAN	749000	760000	632000	513000	585000	632000	1	1.01	0.84	0.69	0.78	0.84	ADAMTS-like protein 4 OS=Homo sapiens OX=9606 GN=ADAMTSL4 PE=1 SV=1
sp|P01624|KV315_HUMAN	553000	757000	540000	558000	515000	517000	1	1.37	0.98	1.01	0.93	0.94	Immunoglobulin kappa variable 3-15 OS=Homo sapiens OX=9606 GN=IGKV3-15 PE=1 SV=2
sp|A0A087WSY6|KVD15_HUMAN	553000	757000	540000	558000	515000	517000	1	1.37	0.98	1.01	0.93	0.94	Immunoglobulin kappa variable 3D-15 OS=Homo sapiens OX=9606 GN=IGKV3D-15 PE=3 SV=6
sp|P18428|LBP_HUMAN	6140000	7240000	6080000	5080000	9290000	6870000	1	1.18	0.99	0.83	1.51	1.12	Lipopolysaccharide-binding protein OS=Homo sapiens OX=9606 GN=LBP PE=1 SV=3
sp|Q13790|APOF_HUMAN	1870000	2480000	1920000	2260000	3790000	2060000	1	1.33	1.03	1.21	2.03	1.1	Apolipoprotein F OS=Homo sapiens OX=9606 GN=APOF PE=1 SV=2
sp|Q15149|PLEC_HUMAN	4830000	3490000	5140000	3320000	1570000	1390000	1	0.72	1.07	0.69	0.33	0.29	Plectin OS=Homo sapiens OX=9606 GN=PLEC PE=1 SV=3
sp|Q5T749|KPRP_HUMAN	1900000	3280000	2040000	2220000	3340000	2640000	1	1.73	1.08	1.17	1.76	1.39	Keratinocyte proline-rich protein OS=Homo sapiens OX=9606 GN=KPRP PE=1 SV=1
E9PDE4|E9PDE4_HUMAN	27700000	34500000	25800000	38700000	13000000	8050000	1	1.25	0.93	1.4	0.47	0.29	Calpain inhibitor OS=Homo sapiens OX=9606 GN=CAST PE=1 SV=1
E9PCH5|E9PCH5_HUMAN	27700000	34500000	25800000	38700000	13000000	8050000	1	1.25	0.93	1.4	0.47	0.29	Calpain inhibitor OS=Homo sapiens OX=9606 GN=CAST PE=1 SV=1
sp|P20810|ICAL_HUMAN	27700000	34500000	25800000	38700000	13000000	8050000	1	1.25	0.93	1.4	0.47	0.29	Calpastatin OS=Homo sapiens OX=9606 GN=CAST PE=1 SV=4
sp|P11277|SPTB1_HUMAN	1650000	2210000	1710000	1980000	2930000	2530000	1	1.34	1.04	1.2	1.78	1.53	Spectrin beta chain erythrocytic OS=Homo sapiens OX=9606 GN=SPTB PE=1 SV=5
sp|P12110|CO6A2_HUMAN	11400000	10100000	11300000	8130000	9230000	10600000	1	0.89	0.99	0.71	0.81	0.93	Collagen alpha-2(VI) chain OS=Homo sapiens OX=9606 GN=COL6A2 PE=1 SV=4
sp|A0A075B6R9|KVD24_HUMAN	15200000	17600000	15600000	15700000	16500000	15900000	1	1.16	1.03	1.03	1.08	1.05	Probable non-functional immunoglobulin kappa variable 2D-24 OS=Homo sapiens OX=9606 GN=IGKV2D-24 PE=1 SV=1
sp|A0A0C4DH68|KV224_HUMAN	15200000	17600000	15600000	15700000	16500000	15900000	1	1.16	1.03	1.03	1.08	1.05	Immunoglobulin kappa variable 2-24 OS=Homo sapiens OX=9606 GN=IGKV2-24 PE=3 SV=1
sp|A0A0C4DH36|HV338_HUMAN	4530000	4910000	5080000	7810000	5700000	7470000	1	1.08	1.12	1.72	1.26	1.65	Probable non-functional immunoglobulin heavy variable 3-38 OS=Homo sapiens OX=9606 GN=IGHV3-38 PE=1 SV=1
sp|Q08554|DSC1_HUMAN	1660000	1720000	1410000	1320000	2310000	1640000	1	1.04	0.85	0.8	1.39	0.99	Desmocollin-1 OS=Homo sapiens OX=9606 GN=DSC1 PE=1 SV=2
H9KV75|H9KV75_HUMAN	1030000	1600000	882000	1250000	1950000	582000	1	1.55	0.85	1.21	1.89	0.56	Alpha-actinin-1 OS=Homo sapiens OX=9606 GN=ACTN1 PE=1 SV=1
sp|P12814|ACTN1_HUMAN	1030000	1600000	882000	1250000	1950000	582000	1	1.55	0.85	1.21	1.89	0.56	Alpha-actinin-1 OS=Homo sapiens OX=9606 GN=ACTN1 PE=1 SV=2
A0A7I2V4Y4|A0A7I2V4Y4_HUMAN	1030000	1600000	882000	1250000	1950000	582000	1	1.55	0.85	1.21	1.89	0.56	Alpha-actinin-1 OS=Homo sapiens OX=9606 GN=ACTN1 PE=1 SV=1
H0YJ11|H0YJ11_HUMAN	1030000	1600000	882000	1250000	1950000	582000	1	1.55	0.85	1.21	1.89	0.56	Alpha-actinin-1 (Fragment) OS=Homo sapiens OX=9606 GN=ACTN1 PE=1 SV=1
sp|Q9NQ38|ISK5_HUMAN	5810000	6640000	6950000	9440000	1270000	1280000	1	1.14	1.2	1.63	0.22	0.22	Serine protease inhibitor Kazal-type 5 OS=Homo sapiens OX=9606 GN=SPINK5 PE=1 SV=2
E7EWP9|E7EWP9_HUMAN	5810000	6640000	6950000	9440000	1270000	1280000	1	1.14	1.2	1.63	0.22	0.22	Serine protease inhibitor Kazal-type 5 (Fragment) OS=Homo sapiens OX=9606 GN=SPINK5 PE=1 SV=1
sp|P01701|LV151_HUMAN	32500000	71300000	30500000	41600000	40700000	38300000	1	2.2	0.94	1.28	1.25	1.18	Immunoglobulin lambda variable 1-51 OS=Homo sapiens OX=9606 GN=IGLV1-51 PE=1 SV=2
sp|P07585|PGS2_HUMAN	59800000	25300000	52200000	12900000	7950000	7200000	1	0.42	0.87	0.22	0.13	0.12	Decorin OS=Homo sapiens OX=9606 GN=DCN PE=1 SV=1
A0A0C4DGZ8|A0A0C4DGZ8_HUMAN	2440000	2480000	2510000	1680000	2550000	1890000	1	1.02	1.03	0.69	1.05	0.78	Glycoprotein Ib (Platelet) alpha polypeptide OS=Homo sapiens OX=9606 GN=GP1BA PE=1 SV=1
sp|P07359|GP1BA_HUMAN	2440000	2480000	2510000	1680000	2550000	1890000	1	1.02	1.03	0.69	1.05	0.78	Platelet glycoprotein Ib alpha chain OS=Homo sapiens OX=9606 GN=GP1BA PE=1 SV=2
sp|P17661|DESM_HUMAN	24200000	17200000	20700000	12700000	4100000	4370000	1	0.71	0.85	0.52	0.17	0.18	Desmin OS=Homo sapiens OX=9606 GN=DES PE=1 SV=3
sp|P01766|HV313_HUMAN	602000	584000	371000	800000	358000	401000	1	0.97	0.62	1.33	0.59	0.67	Immunoglobulin heavy variable 3-13 OS=Homo sapiens OX=9606 GN=IGHV3-13 PE=1 SV=2
sp|P62258|1433E_HUMAN	5350000	5680000	3900000	8760000	230000	472000	1	1.06	0.73	1.64	0.04	0.09	14-3-3 protein epsilon OS=Homo sapiens OX=9606 GN=YWHAE PE=1 SV=1
sp|P01718|LV327_HUMAN	16000000	27500000	8650000	10500000	7470000	21200000	1	1.72	0.54	0.65	0.47	1.32	Immunoglobulin lambda variable 3-27 OS=Homo sapiens OX=9606 GN=IGLV3-27 PE=1 SV=2
K7ENT6|K7ENT6_HUMAN	3110000	3880000	1980000	1670000	2330000	3550000	1	1.25	0.63	0.54	0.75	1.14	Tropomyosin alpha-4 chain OS=Homo sapiens OX=9606 GN=TPM4 PE=1 SV=3
A0A2R8YH90|A0A2R8YH90_HUMAN	3110000	3880000	1980000	1670000	2330000	3550000	1	1.25	0.63	0.54	0.75	1.14	Tropomyosin alpha-4 chain (Fragment) OS=Homo sapiens OX=9606 GN=TPM4 PE=1 SV=1
A0A2R8YHD2|A0A2R8YHD2_HUMAN	3110000	3880000	1980000	1670000	2330000	3550000	1	1.25	0.63	0.54	0.75	1.14	Tropomyosin alpha-4 chain (Fragment) OS=Homo sapiens OX=9606 GN=TPM4 PE=1 SV=2
A0A2R8Y5V9|A0A2R8Y5V9_HUMAN	3110000	3880000	1980000	1670000	2330000	3550000	1	1.25	0.63	0.54	0.75	1.14	Tropomyosin alpha-4 chain OS=Homo sapiens OX=9606 GN=TPM4 PE=1 SV=1
A0A2R8YE05|A0A2R8YE05_HUMAN	3110000	3880000	1980000	1670000	2330000	3550000	1	1.25	0.63	0.54	0.75	1.14	Tropomyosin alpha-4 chain OS=Homo sapiens OX=9606 GN=TPM4 PE=1 SV=1
sp|P67936|TPM4_HUMAN	3110000	3880000	1980000	1670000	2330000	3550000	1	1.25	0.63	0.54	0.75	1.14	Tropomyosin alpha-4 chain OS=Homo sapiens OX=9606 GN=TPM4 PE=1 SV=3
H7C4K3|H7C4K3_HUMAN	6140000	7080000	6180000	6860000	2200000	2200000	1	1.15	1.01	1.12	0.36	0.36	Integrin beta OS=Homo sapiens OX=9606 GN=ITGB1 PE=1 SV=2
A0A7I2V348|A0A7I2V348_HUMAN	6140000	7080000	6180000	6860000	2200000	2200000	1	1.15	1.01	1.12	0.36	0.36	Integrin beta OS=Homo sapiens OX=9606 GN=ITGB1 PE=1 SV=1
A0A7I2V2F9|A0A7I2V2F9_HUMAN	6140000	7080000	6180000	6860000	2200000	2200000	1	1.15	1.01	1.12	0.36	0.36	Integrin beta OS=Homo sapiens OX=9606 GN=ITGB1 PE=1 SV=1
sp|P05556|ITB1_HUMAN	6140000	7080000	6180000	6860000	2200000	2200000	1	1.15	1.01	1.12	0.36	0.36	Integrin beta-1 OS=Homo sapiens OX=9606 GN=ITGB1 PE=1 SV=2
E7EUI6|E7EUI6_HUMAN	6140000	7080000	6180000	6860000	2200000	2200000	1	1.15	1.01	1.12	0.36	0.36	Integrin beta OS=Homo sapiens OX=9606 GN=ITGB1 PE=1 SV=2
C9JPK5|C9JPK5_HUMAN	6140000	7080000	6180000	6860000	2200000	2200000	1	1.15	1.01	1.12	0.36	0.36	Integrin beta OS=Homo sapiens OX=9606 GN=ITGB1 PE=1 SV=2
sp|P00451|FA8_HUMAN	1690000	2410000	2030000	2150000	2650000	2150000	1	1.43	1.21	1.28	1.57	1.28	Coagulation factor VIII OS=Homo sapiens OX=9606 GN=F8 PE=1 SV=1
sp|P02461|CO3A1_HUMAN	60600000	26900000	61800000	14000000	9630000	7770000	1	0.44	1.02	0.23	0.16	0.13	Collagen alpha-1(III) chain OS=Homo sapiens OX=9606 GN=COL3A1 PE=1 SV=4
sp|P19320|VCAM1_HUMAN	1530000	1860000	1810000	1650000	1730000	1580000	1	1.22	1.18	1.08	1.13	1.03	Vascular cell adhesion protein 1 OS=Homo sapiens OX=9606 GN=VCAM1 PE=1 SV=1
sp|O43707|ACTN4_HUMAN	3570000	2980000	2990000	3070000	1110000	1170000	1	0.83	0.84	0.86	0.31	0.33	Alpha-actinin-4 OS=Homo sapiens OX=9606 GN=ACTN4 PE=1 SV=2
H7C144|H7C144_HUMAN	3570000	2980000	2990000	3070000	1110000	1170000	1	0.83	0.84	0.86	0.31	0.33	Alpha-actinin-4 OS=Homo sapiens OX=9606 GN=ACTN4 PE=1 SV=2
F5GXS2|F5GXS2_HUMAN	3570000	2980000	2990000	3070000	1110000	1170000	1	0.83	0.84	0.86	0.31	0.33	Actinin alpha 4 isoform CRA_a OS=Homo sapiens OX=9606 GN=ACTN4 PE=1 SV=3
sp|P13796|PLSL_HUMAN	1120000	1380000	1160000	1230000	1180000	1230000	1	1.23	1.03	1.1	1.05	1.1	Plastin-2 OS=Homo sapiens OX=9606 GN=LCP1 PE=1 SV=6
sp|Q15063|POSTN_HUMAN	8260000	5460000	9970000	4730000	2720000	3160000	1	0.66	1.21	0.57	0.33	0.38	Periostin OS=Homo sapiens OX=9606 GN=POSTN PE=1 SV=2
B1ALD9|B1ALD9_HUMAN	8260000	5460000	9970000	4730000	2720000	3160000	1	0.66	1.21	0.57	0.33	0.38	Periostin OS=Homo sapiens OX=9606 GN=POSTN PE=1 SV=1
sp|Q15113|PCOC1_HUMAN	651000	917000	769000	1080000	811000	1050000	1	1.41	1.18	1.65	1.25	1.61	Procollagen C-endopeptidase enhancer 1 OS=Homo sapiens OX=9606 GN=PCOLCE PE=1 SV=2
H6UYS7|H6UYS7_HUMAN	1300000	1190000	1510000	1970000	1480000	2310000	1	0.91	1.16	1.51	1.13	1.77	Alpha-synuclein OS=Homo sapiens OX=9606 GN=SNCA PE=1 SV=1
E7EPV7|E7EPV7_HUMAN	1300000	1190000	1510000	1970000	1480000	2310000	1	0.91	1.16	1.51	1.13	1.77	Alpha-synuclein OS=Homo sapiens OX=9606 GN=SNCA PE=1 SV=1
sp|P37840|SYUA_HUMAN	1300000	1190000	1510000	1970000	1480000	2310000	1	0.91	1.16	1.51	1.13	1.77	Alpha-synuclein OS=Homo sapiens OX=9606 GN=SNCA PE=1 SV=1
A0A669KB41|A0A669KB41_HUMAN	1300000	1190000	1510000	1970000	1480000	2310000	1	0.91	1.16	1.51	1.13	1.77	Alpha-synuclein OS=Homo sapiens OX=9606 GN=SNCA PE=1 SV=1
A0A669KBH5|A0A669KBH5_HUMAN	1300000	1190000	1510000	1970000	1480000	2310000	1	0.91	1.16	1.51	1.13	1.77	Alpha-synuclein OS=Homo sapiens OX=9606 GN=SNCA PE=1 SV=1
sp|P15153|RAC2_HUMAN	2040000	2320000	1820000	2140000	2370000	2230000	1	1.14	0.89	1.05	1.16	1.09	Ras-related C3 botulinum toxin substrate 2 OS=Homo sapiens OX=9606 GN=RAC2 PE=1 SV=1
B1AH77|B1AH77_HUMAN	2040000	2320000	1820000	2140000	2370000	2230000	1	1.14	0.89	1.05	1.16	1.09	Ras-related C3 botulinum toxin substrate 2 OS=Homo sapiens OX=9606 GN=RAC2 PE=1 SV=1
B1AH80|B1AH80_HUMAN	2040000	2320000	1820000	2140000	2370000	2230000	1	1.14	0.89	1.05	1.16	1.09	Ras-related C3 botulinum toxin substrate 2 OS=Homo sapiens OX=9606 GN=RAC2 PE=1 SV=1
F5H6X6|F5H6X6_HUMAN	3180000	5200000	3630000	5500000	842000	1100000	1	1.64	1.14	1.73	0.27	0.35	Neutral alpha-glucosidase AB OS=Homo sapiens OX=9606 GN=GANAB PE=1 SV=1
sp|Q14697|GANAB_HUMAN	3180000	5200000	3630000	5500000	842000	1100000	1	1.64	1.14	1.73	0.27	0.35	Neutral alpha-glucosidase AB OS=Homo sapiens OX=9606 GN=GANAB PE=1 SV=3
sp|A0A075B6I0|LV861_HUMAN	43200000	56000000	32600000	51600000	50100000	35900000	1	1.3	0.75	1.19	1.16	0.83	Immunoglobulin lambda variable 8-61 OS=Homo sapiens OX=9606 GN=IGLV8-61 PE=3 SV=7
sp|A0A075B6K0|LV316_HUMAN	3160000	4820000	2550000	9340000	4000000	6140000	1	1.52	0.81	2.95	1.26	1.94	Immunoglobulin lambda variable 3-16 OS=Homo sapiens OX=9606 GN=IGLV3-16 PE=3 SV=2
sp|P51858|HDGF_HUMAN	3390000	4000000	2410000	7300000	518000	802000	1	1.18	0.71	2.15	0.15	0.24	Hepatoma-derived growth factor OS=Homo sapiens OX=9606 GN=HDGF PE=1 SV=1
E5RH81|E5RH81_HUMAN	3940000	3740000	5440000	4470000	5900000	5380000	1	0.95	1.38	1.14	1.5	1.37	Carbonic anhydrase (Fragment) OS=Homo sapiens OX=9606 GN=CA1 PE=1 SV=8
E5RFE7|E5RFE7_HUMAN	3940000	3740000	5440000	4470000	5900000	5380000	1	0.95	1.38	1.14	1.5	1.37	Carbonic anhydrase (Fragment) OS=Homo sapiens OX=9606 GN=CA1 PE=1 SV=1
E5RHP7|E5RHP7_HUMAN	3940000	3740000	5440000	4470000	5900000	5380000	1	0.95	1.38	1.14	1.5	1.37	Carbonic anhydrase (Fragment) OS=Homo sapiens OX=9606 GN=CA1 PE=1 SV=1
sp|P00915|CAH1_HUMAN	3940000	3740000	5440000	4470000	5900000	5380000	1	0.95	1.38	1.14	1.5	1.37	Carbonic anhydrase 1 OS=Homo sapiens OX=9606 GN=CA1 PE=1 SV=2
H0YBE2|H0YBE2_HUMAN	3940000	3740000	5440000	4470000	5900000	5380000	1	0.95	1.38	1.14	1.5	1.37	Carbonic anhydrase (Fragment) OS=Homo sapiens OX=9606 GN=CA1 PE=1 SV=1
sp|A0A075B6Q5|HV364_HUMAN	223000	306000	370000	403000	490000	363000	1	1.37	1.66	1.8	2.2	1.63	Immunoglobulin heavy variable 3-64 OS=Homo sapiens OX=9606 GN=IGHV3-64 PE=3 SV=1
sp|A0A0A0MT36|KVD21_HUMAN	2110000	3550000	2750000	2320000	2580000	2630000	1	1.68	1.3	1.1	1.22	1.25	Immunoglobulin kappa variable 6D-21 OS=Homo sapiens OX=9606 GN=IGKV6D-21 PE=3 SV=1
R4GN98|R4GN98_HUMAN	6780000	8550000	6220000	7710000	3570000	3340000	1	1.26	0.92	1.14	0.53	0.49	Protein S100 (Fragment) OS=Homo sapiens OX=9606 GN=S100A6 PE=1 SV=1
sp|P06703|S10A6_HUMAN	6780000	8550000	6220000	7710000	3570000	3340000	1	1.26	0.92	1.14	0.53	0.49	Protein S100-A6 OS=Homo sapiens OX=9606 GN=S100A6 PE=1 SV=1
A0A7P0TAT8|A0A7P0TAT8_HUMAN	7470000	11300000	7400000	13100000	2230000	2440000	1	1.52	0.99	1.75	0.3	0.33	Endoplasmin OS=Homo sapiens OX=9606 GN=HSP90B1 PE=4 SV=1
A0A7P0T917|A0A7P0T917_HUMAN	7470000	11300000	7400000	13100000	2230000	2440000	1	1.52	0.99	1.75	0.3	0.33	Endoplasmin OS=Homo sapiens OX=9606 GN=HSP90B1 PE=4 SV=1
A0A7P0TAE1|A0A7P0TAE1_HUMAN	7470000	11300000	7400000	13100000	2230000	2440000	1	1.52	0.99	1.75	0.3	0.33	Endoplasmin OS=Homo sapiens OX=9606 GN=HSP90B1 PE=4 SV=1
H0YIV0|H0YIV0_HUMAN	7470000	11300000	7400000	13100000	2230000	2440000	1	1.52	0.99	1.75	0.3	0.33	Endoplasmin OS=Homo sapiens OX=9606 GN=HSP90B1 PE=1 SV=2
sp|P14625|ENPL_HUMAN	7470000	11300000	7400000	13100000	2230000	2440000	1	1.52	0.99	1.75	0.3	0.33	Endoplasmin OS=Homo sapiens OX=9606 GN=HSP90B1 PE=1 SV=1
A0A7P0T823|A0A7P0T823_HUMAN	7470000	11300000	7400000	13100000	2230000	2440000	1	1.52	0.99	1.75	0.3	0.33	Endoplasmin OS=Homo sapiens OX=9606 GN=HSP90B1 PE=4 SV=1
A0A087WT78|A0A087WT78_HUMAN	7470000	11300000	7400000	13100000	2230000	2440000	1	1.52	0.99	1.75	0.3	0.33	Endoplasmin OS=Homo sapiens OX=9606 GN=HSP90B1 PE=1 SV=1
A0A7P0TAY2|A0A7P0TAY2_HUMAN	7470000	11300000	7400000	13100000	2230000	2440000	1	1.52	0.99	1.75	0.3	0.33	Endoplasmin OS=Homo sapiens OX=9606 GN=HSP90B1 PE=4 SV=1
sp|Q96A08|H2B1A_HUMAN	85700000	49200000	131000000	28300000	8500000	6960000	1	0.57	1.53	0.33	0.1	0.08	Histone H2B type 1-A OS=Homo sapiens OX=9606 GN=H2BC1 PE=1 SV=3
sp|Q99880|H2B1L_HUMAN	85700000	49200000	131000000	28300000	8500000	6960000	1	0.57	1.53	0.33	0.1	0.08	Histone H2B type 1-L OS=Homo sapiens OX=9606 GN=H2BC13 PE=1 SV=3
sp|Q5QNW6|H2B2F_HUMAN	85700000	49200000	131000000	28300000	8500000	6960000	1	0.57	1.53	0.33	0.1	0.08	Histone H2B type 2-F OS=Homo sapiens OX=9606 GN=H2BC18 PE=1 SV=3
sp|O60814|H2B1K_HUMAN	85700000	49200000	131000000	28300000	8500000	6960000	1	0.57	1.53	0.33	0.1	0.08	Histone H2B type 1-K OS=Homo sapiens OX=9606 GN=H2BC12 PE=1 SV=3
sp|P58876|H2B1D_HUMAN	85700000	49200000	131000000	28300000	8500000	6960000	1	0.57	1.53	0.33	0.1	0.08	Histone H2B type 1-D OS=Homo sapiens OX=9606 GN=H2BC5 PE=1 SV=2
sp|P23527|H2B1O_HUMAN	85700000	49200000	131000000	28300000	8500000	6960000	1	0.57	1.53	0.33	0.1	0.08	Histone H2B type 1-O OS=Homo sapiens OX=9606 GN=H2BC17 PE=1 SV=3
sp|P57053|H2BFS_HUMAN	85700000	49200000	131000000	28300000	8500000	6960000	1	0.57	1.53	0.33	0.1	0.08	Histone H2B type F-S OS=Homo sapiens OX=9606 GN=H2BS1 PE=1 SV=2
sp|Q16778|H2B2E_HUMAN	85700000	49200000	131000000	28300000	8500000	6960000	1	0.57	1.53	0.33	0.1	0.08	Histone H2B type 2-E OS=Homo sapiens OX=9606 GN=H2BC21 PE=1 SV=3
sp|P33778|H2B1B_HUMAN	85700000	49200000	131000000	28300000	8500000	6960000	1	0.57	1.53	0.33	0.1	0.08	Histone H2B type 1-B OS=Homo sapiens OX=9606 GN=H2BC3 PE=1 SV=2
sp|Q99879|H2B1M_HUMAN	85700000	49200000	131000000	28300000	8500000	6960000	1	0.57	1.53	0.33	0.1	0.08	Histone H2B type 1-M OS=Homo sapiens OX=9606 GN=H2BC14 PE=1 SV=3
sp|Q93079|H2B1H_HUMAN	85700000	49200000	131000000	28300000	8500000	6960000	1	0.57	1.53	0.33	0.1	0.08	Histone H2B type 1-H OS=Homo sapiens OX=9606 GN=H2BC9 PE=1 SV=3
sp|Q99877|H2B1N_HUMAN	85700000	49200000	131000000	28300000	8500000	6960000	1	0.57	1.53	0.33	0.1	0.08	Histone H2B type 1-N OS=Homo sapiens OX=9606 GN=H2BC15 PE=1 SV=3
sp|P62807|H2B1C_HUMAN	85700000	49200000	131000000	28300000	8500000	6960000	1	0.57	1.53	0.33	0.1	0.08	Histone H2B type 1-C/E/F/G/I OS=Homo sapiens OX=9606 GN=H2BC10 PE=1 SV=4
sp|P06899|H2B1J_HUMAN	85700000	49200000	131000000	28300000	8500000	6960000	1	0.57	1.53	0.33	0.1	0.08	Histone H2B type 1-J OS=Homo sapiens OX=9606 GN=H2BC11 PE=1 SV=3
U3KQK0|U3KQK0_HUMAN	85700000	49200000	131000000	28300000	8500000	6960000	1	0.57	1.53	0.33	0.1	0.08	Histone H2B OS=Homo sapiens OX=9606 GN=H2BC15 PE=1 SV=1
sp|P13010|XRCC5_HUMAN	9990000	6170000	11600000	5810000	1210000	1340000	1	0.62	1.16	0.58	0.12	0.13	X-ray repair cross-complementing protein 5 OS=Homo sapiens OX=9606 GN=XRCC5 PE=1 SV=3
sp|P34096|RNAS4_HUMAN	1970000	2280000	2370000	3300000	2500000	2660000	1	1.16	1.2	1.67	1.27	1.35	Ribonuclease 4 OS=Homo sapiens OX=9606 GN=RNASE4 PE=1 SV=3
sp|Q8NHW5|RLA0L_HUMAN	10300000	7010000	11100000	7000000	3010000	3210000	1	0.68	1.08	0.68	0.29	0.31	60S acidic ribosomal protein P0-like OS=Homo sapiens OX=9606 GN=RPLP0P6 PE=5 SV=1
sp|P00338|LDHA_HUMAN	417000	362000	333000	332000	289000	329000	1	0.87	0.8	0.8	0.69	0.79	L-lactate dehydrogenase A chain OS=Homo sapiens OX=9606 GN=LDHA PE=1 SV=2
sp|P02549|SPTA1_HUMAN	2990000	1830000	2900000	2840000	2970000	3100000	1	0.61	0.97	0.95	0.99	1.04	Spectrin alpha chain erythrocytic 1 OS=Homo sapiens OX=9606 GN=SPTA1 PE=1 SV=5
sp|P01714|LV319_HUMAN	91500000	122000000	67700000	89100000	59000000	92800000	1	1.34	0.74	0.97	0.64	1.01	Immunoglobulin lambda variable 3-19 OS=Homo sapiens OX=9606 GN=IGLV3-19 PE=1 SV=2
sp|P10412|H14_HUMAN	24100000	12100000	24400000	12500000	5390000	5040000	1	0.5	1.01	0.52	0.22	0.21	Histone H1.4 OS=Homo sapiens OX=9606 GN=H1-4 PE=1 SV=2
sp|P31944|CASPE_HUMAN	2670000	2340000	2180000	2940000	3510000	2510000	1	0.88	0.82	1.1	1.32	0.94	Caspase-14 OS=Homo sapiens OX=9606 GN=CASP14 PE=1 SV=2
A0A075B7B6|A0A075B7B6_HUMAN	5790000	5430000	6660000	6990000	3570000	8910000	1	0.94	1.15	1.21	0.62	1.54	Immunoglobulin heavy variable 4/OR15-8 (non-functional) (Fragment) OS=Homo sapiens OX=9606 GN=IGHV4OR15-8 PE=4 SV=1
sp|P59666|DEF3_HUMAN	6590000	8150000	5980000	9410000	11800000	9920000	1	1.24	0.91	1.43	1.79	1.51	Neutrophil defensin 3 OS=Homo sapiens OX=9606 GN=DEFA3 PE=1 SV=1
sp|P59665|DEF1_HUMAN	6590000	8150000	5980000	9410000	11800000	9920000	1	1.24	0.91	1.43	1.79	1.51	Neutrophil defensin 1 OS=Homo sapiens OX=9606 GN=DEFA1B PE=1 SV=1
B0YJC4|B0YJC4_HUMAN	134000	226000	103000	101000	111000	113000	1	1.69	0.77	0.75	0.83	0.84	Vimentin OS=Homo sapiens OX=9606 GN=VIM PE=1 SV=1
sp|P08670|VIME_HUMAN	134000	226000	103000	101000	111000	113000	1	1.69	0.77	0.75	0.83	0.84	Vimentin OS=Homo sapiens OX=9606 GN=VIM PE=1 SV=4
A0A1B0GTT5|A0A1B0GTT5_HUMAN	134000	226000	103000	101000	111000	113000	1	1.69	0.77	0.75	0.83	0.84	Vimentin (Fragment) OS=Homo sapiens OX=9606 GN=VIM PE=1 SV=1
sp|Q10588|BST1_HUMAN	1490000	1270000	1760000	1230000	998000	1030000	1	0.85	1.18	0.82	0.67	0.69	ADP-ribosyl cyclase/cyclic ADP-ribose hydrolase 2 OS=Homo sapiens OX=9606 GN=BST1 PE=1 SV=2
A6NC48|A6NC48_HUMAN	1490000	1270000	1760000	1230000	998000	1030000	1	0.85	1.18	0.82	0.67	0.69	ADP-ribosyl cyclase/cyclic ADP-ribose hydrolase OS=Homo sapiens OX=9606 GN=BST1 PE=1 SV=1
sp|Q02161|RHD_HUMAN	304000	456000	250000	470000	1050000	720000	1	1.5	0.82	1.55	3.44	2.37	Blood group Rh(D) polypeptide OS=Homo sapiens OX=9606 GN=RHD PE=1 SV=3
E7EQ47|E7EQ47_HUMAN	304000	456000	250000	470000	1050000	720000	1	1.5	0.82	1.55	3.44	2.37	Blood group Rh(CE) polypeptide OS=Homo sapiens OX=9606 GN=RHCE PE=3 SV=1
F6XSS0|F6XSS0_HUMAN	304000	456000	250000	470000	1050000	720000	1	1.5	0.82	1.55	3.44	2.37	Blood group Rh(CE) polypeptide OS=Homo sapiens OX=9606 GN=RHCE PE=1 SV=1
sp|P18577|RHCE_HUMAN	304000	456000	250000	470000	1050000	720000	1	1.5	0.82	1.55	3.44	2.37	Blood group Rh(CE) polypeptide OS=Homo sapiens OX=9606 GN=RHCE PE=1 SV=2
sp|P26038|MOES_HUMAN	2040000	1990000	1970000	1700000	1050000	1120000	1	0.98	0.96	0.83	0.52	0.55	Moesin OS=Homo sapiens OX=9606 GN=MSN PE=1 SV=3
sp|P08709|FA7_HUMAN	687000	909000	728000	660000	786000	719000	1	1.32	1.06	0.96	1.14	1.05	Coagulation factor VII OS=Homo sapiens OX=9606 GN=F7 PE=1 SV=1
F5H8B0|F5H8B0_HUMAN	687000	909000	728000	660000	786000	719000	1	1.32	1.06	0.96	1.14	1.05	Coagulation factor VII OS=Homo sapiens OX=9606 GN=F7 PE=1 SV=2
E7EU05|E7EU05_HUMAN	1340000	1880000	1590000	1090000	1560000	1330000	1	1.4	1.19	0.81	1.17	0.99	Glycoprotein IIIb (Fragment) OS=Homo sapiens OX=9606 GN=CD36 PE=1 SV=2
sp|P16671|CD36_HUMAN	1340000	1880000	1590000	1090000	1560000	1330000	1	1.4	1.19	0.81	1.17	0.99	Platelet glycoprotein 4 OS=Homo sapiens OX=9606 GN=CD36 PE=1 SV=2
sp|Q6UX71|PXDC2_HUMAN	4300000	4420000	4170000	6390000	5380000	4280000	1	1.03	0.97	1.48	1.25	0.99	Plexin domain-containing protein 2 OS=Homo sapiens OX=9606 GN=PLXDC2 PE=1 SV=1
A0A1W2PNV4|A0A1W2PNV4_HUMAN	2540000	2500000	2350000	3000000	1110000	1160000	1	0.98	0.92	1.18	0.44	0.46	Uncharacterized protein OS=Homo sapiens OX=9606 PE=3 SV=1
C9K057|C9K057_HUMAN	2540000	2500000	2350000	3000000	1110000	1160000	1	0.98	0.92	1.18	0.44	0.46	Actin-related protein 2/3 complex subunit 1B OS=Homo sapiens OX=9606 GN=ARPC1B PE=1 SV=2
sp|P04430|KV116_HUMAN	2060000	4080000	2840000	2830000	2580000	2580000	1	1.99	1.38	1.38	1.25	1.26	Immunoglobulin kappa variable 1-16 OS=Homo sapiens OX=9606 GN=IGKV1-16 PE=1 SV=2
sp|P06312|KV401_HUMAN	56800000	69500000	58600000	70000000	69300000	65800000	1	1.22	1.03	1.23	1.22	1.16	Immunoglobulin kappa variable 4-1 OS=Homo sapiens OX=9606 GN=IGKV4-1 PE=1 SV=1
sp|Q9H0U4|RAB1B_HUMAN	2280000	2680000	2010000	1740000	3080000	2380000	1	1.18	0.88	0.76	1.35	1.04	Ras-related protein Rab-1B OS=Homo sapiens OX=9606 GN=RAB1B PE=1 SV=1
sp|P62820|RAB1A_HUMAN	2280000	2680000	2010000	1740000	3080000	2380000	1	1.18	0.88	0.76	1.35	1.04	Ras-related protein Rab-1A OS=Homo sapiens OX=9606 GN=RAB1A PE=1 SV=3
sp|P23229|ITA6_HUMAN	3700000	2600000	3480000	2690000	1090000	1060000	1	0.7	0.94	0.73	0.3	0.29	Integrin alpha-6 OS=Homo sapiens OX=9606 GN=ITGA6 PE=1 SV=5
sp|P13533|MYH6_HUMAN	7080000	810000	2950000	609000	498000	659000	1	0.11	0.42	0.09	0.07	0.09	Myosin-6 OS=Homo sapiens OX=9606 GN=MYH6 PE=2 SV=5
sp|P01601|KVD16_HUMAN	1670000	2450000	2420000	2550000	3290000	2190000	1	1.46	1.44	1.53	1.97	1.31	Immunoglobulin kappa variable 1D-16 OS=Homo sapiens OX=9606 GN=IGKV1D-16 PE=3 SV=2
A0A087WXM6|A0A087WXM6_HUMAN	32200000	25300000	46000000	29400000	4250000	5900000	1	0.79	1.43	0.91	0.13	0.18	60S ribosomal protein L17 (Fragment) OS=Homo sapiens OX=9606 GN=RPL17 PE=1 SV=1
J3QQT2|J3QQT2_HUMAN	32200000	25300000	46000000	29400000	4250000	5900000	1	0.79	1.43	0.91	0.13	0.18	60S ribosomal protein L17 (Fragment) OS=Homo sapiens OX=9606 GN=RPL17 PE=1 SV=1
J3QLC8|J3QLC8_HUMAN	32200000	25300000	46000000	29400000	4250000	5900000	1	0.79	1.43	0.91	0.13	0.18	60S ribosomal protein L17 OS=Homo sapiens OX=9606 GN=RPL17 PE=1 SV=1
J3KRX5|J3KRX5_HUMAN	32200000	25300000	46000000	29400000	4250000	5900000	1	0.79	1.43	0.91	0.13	0.18	60S ribosomal protein L17 (Fragment) OS=Homo sapiens OX=9606 GN=RPL17 PE=1 SV=1
sp|P18621|RL17_HUMAN	32200000	25300000	46000000	29400000	4250000	5900000	1	0.79	1.43	0.91	0.13	0.18	60S ribosomal protein L17 OS=Homo sapiens OX=9606 GN=RPL17 PE=1 SV=3
A0A0A6YYL6|A0A0A6YYL6_HUMAN	32200000	25300000	46000000	29400000	4250000	5900000	1	0.79	1.43	0.91	0.13	0.18	60S ribosomal protein L17 OS=Homo sapiens OX=9606 GN=RPL17-C18orf32 PE=3 SV=1
A0A0A0MRF8|A0A0A0MRF8_HUMAN	32200000	25300000	46000000	29400000	4250000	5900000	1	0.79	1.43	0.91	0.13	0.18	60S ribosomal protein L17 OS=Homo sapiens OX=9606 GN=RPL17-C18orf32 PE=3 SV=1
sp|Q9P0L0|VAPA_HUMAN	18500000	14100000	20400000	14600000	4100000	4500000	1	0.76	1.1	0.79	0.22	0.24	Vesicle-associated membrane protein-associated protein A OS=Homo sapiens OX=9606 GN=VAPA PE=1 SV=3
E5RIP1|E5RIP1_HUMAN	5890000	5610000	6900000	5580000	1870000	2660000	1	0.95	1.17	0.95	0.32	0.45	40S ribosomal protein S20 OS=Homo sapiens OX=9606 GN=RPS20 PE=1 SV=1
sp|P60866|RS20_HUMAN	5890000	5610000	6900000	5580000	1870000	2660000	1	0.95	1.17	0.95	0.32	0.45	40S ribosomal protein S20 OS=Homo sapiens OX=9606 GN=RPS20 PE=1 SV=1
E5RJX2|E5RJX2_HUMAN	5890000	5610000	6900000	5580000	1870000	2660000	1	0.95	1.17	0.95	0.32	0.45	40S ribosomal protein S20 OS=Homo sapiens OX=9606 GN=RPS20 PE=1 SV=1
sp|P21980|TGM2_HUMAN	295000	565000	370000	493000	637000	645000	1	1.91	1.26	1.67	2.16	2.18	Protein-glutamine gamma-glutamyltransferase 2 OS=Homo sapiens OX=9606 GN=TGM2 PE=1 SV=2
sp|P07195|LDHB_HUMAN	405000	373000	319000	452000	452000	453000	1	0.92	0.79	1.12	1.11	1.12	L-lactate dehydrogenase B chain OS=Homo sapiens OX=9606 GN=LDHB PE=1 SV=2
A0A5F9ZHM4|A0A5F9ZHM4_HUMAN	405000	373000	319000	452000	452000	453000	1	0.92	0.79	1.12	1.11	1.12	L-lactate dehydrogenase OS=Homo sapiens OX=9606 GN=LDHB PE=1 SV=1
sp|A0A0G2JS06|LV539_HUMAN	1240000	1520000	1060000	1340000	1400000	1500000	1	1.22	0.86	1.08	1.13	1.21	Immunoglobulin lambda variable 5-39 OS=Homo sapiens OX=9606 GN=IGLV5-39 PE=3 SV=1
A0A0G2JSC0|A0A0G2JSC0_HUMAN	1240000	1520000	1060000	1340000	1400000	1500000	1	1.22	0.86	1.08	1.13	1.21	Immunoglobulin lambda variable 5-45 (Fragment) OS=Homo sapiens OX=9606 GN=IGLV5-45 PE=1 SV=1
sp|P01706|LV211_HUMAN	25800000	75400000	31900000	30200000	32400000	33400000	1	2.93	1.24	1.17	1.26	1.3	Immunoglobulin lambda variable 2-11 OS=Homo sapiens OX=9606 GN=IGLV2-11 PE=1 SV=2
H0YGS3|H0YGS3_HUMAN	60300000	39200000	55300000	22200000	3770000	4500000	1	0.65	0.92	0.37	0.06	0.07	Microfibrillar-associated protein 5 (Fragment) OS=Homo sapiens OX=9606 GN=MFAP5 PE=1 SV=1
B3KW70|B3KW70_HUMAN	60300000	39200000	55300000	22200000	3770000	4500000	1	0.65	0.92	0.37	0.06	0.07	Microfibrillar-associated protein 5 OS=Homo sapiens OX=9606 GN=MFAP5 PE=1 SV=1
sp|Q13361|MFAP5_HUMAN	60300000	39200000	55300000	22200000	3770000	4500000	1	0.65	0.92	0.37	0.06	0.07	Microfibrillar-associated protein 5 OS=Homo sapiens OX=9606 GN=MFAP5 PE=1 SV=1
F5GYX4|F5GYX4_HUMAN	60300000	39200000	55300000	22200000	3770000	4500000	1	0.65	0.92	0.37	0.06	0.07	Microfibrillar-associated protein 5 OS=Homo sapiens OX=9606 GN=MFAP5 PE=1 SV=1
H0YG03|H0YG03_HUMAN	60300000	39200000	55300000	22200000	3770000	4500000	1	0.65	0.92	0.37	0.06	0.07	Microfibrillar-associated protein 5 (Fragment) OS=Homo sapiens OX=9606 GN=MFAP5 PE=1 SV=1
E9PGA6|E9PGA6_HUMAN	8010000	5520000	6470000	6240000	5610000	6610000	1	0.69	0.81	0.78	0.7	0.82	C1QTNF3-AMACR readthrough (NMD candidate) OS=Homo sapiens OX=9606 GN=C1QTNF3-AMACR PE=4 SV=1
sp|Q9BXJ4|C1QT3_HUMAN	8010000	5520000	6470000	6240000	5610000	6610000	1	0.69	0.81	0.78	0.7	0.82	Complement C1q tumor necrosis factor-related protein 3 OS=Homo sapiens OX=9606 GN=C1QTNF3 PE=1 SV=1
sp|P00441|SODC_HUMAN	2320000	3150000	2150000	2730000	2370000	2220000	1	1.36	0.93	1.18	1.02	0.95	Superoxide dismutase [Cu-Zn] OS=Homo sapiens OX=9606 GN=SOD1 PE=1 SV=2
H7BYH4|H7BYH4_HUMAN	2320000	3150000	2150000	2730000	2370000	2220000	1	1.36	0.93	1.18	1.02	0.95	Superoxide dismutase [Cu-Zn] OS=Homo sapiens OX=9606 GN=SOD1 PE=1 SV=1
sp|P22891|PROZ_HUMAN	2110000	2160000	2570000	1650000	2980000	2170000	1	1.02	1.22	0.78	1.41	1.03	Vitamin K-dependent protein Z OS=Homo sapiens OX=9606 GN=PROZ PE=1 SV=2
sp|P35749|MYH11_HUMAN	3090000	1440000	2780000	1190000	550000	460000	1	0.47	0.9	0.39	0.18	0.15	Myosin-11 OS=Homo sapiens OX=9606 GN=MYH11 PE=1 SV=3
J3QRS3|J3QRS3_HUMAN	5110000	3040000	4130000	2400000	1730000	2090000	1	0.59	0.81	0.47	0.34	0.41	Myosin regulatory light chain 12A OS=Homo sapiens OX=9606 GN=MYL12A PE=1 SV=1
sp|P19105|ML12A_HUMAN	5110000	3040000	4130000	2400000	1730000	2090000	1	0.59	0.81	0.47	0.34	0.41	Myosin regulatory light chain 12A OS=Homo sapiens OX=9606 GN=MYL12A PE=1 SV=2
sp|O14950|ML12B_HUMAN	5110000	3040000	4130000	2400000	1730000	2090000	1	0.59	0.81	0.47	0.34	0.41	Myosin regulatory light chain 12B OS=Homo sapiens OX=9606 GN=MYL12B PE=1 SV=2
sp|A0A0B4J2D9|KVD13_HUMAN	899000	1230000	889000	1110000	757000	780000	1	1.37	0.99	1.23	0.84	0.87	Immunoglobulin kappa variable 1D-13 OS=Homo sapiens OX=9606 GN=IGKV1D-13 PE=3 SV=1
sp|P0DP09|KV113_HUMAN	899000	1230000	889000	1110000	757000	780000	1	1.37	0.99	1.23	0.84	0.87	Immunoglobulin kappa variable 1-13 OS=Homo sapiens OX=9606 GN=IGKV1-13 PE=3 SV=1
sp|Q9UII2|ATIF1_HUMAN	10500000	10900000	11700000	15100000	4030000	3120000	1	1.04	1.11	1.44	0.38	0.3	ATPase inhibitor mitochondrial OS=Homo sapiens OX=9606 GN=ATP5IF1 PE=1 SV=1
sp|P34932|HSP74_HUMAN	5180000	4260000	4880000	4750000	494000	686000	1	0.82	0.94	0.92	0.1	0.13	Heat shock 70 kDa protein 4 OS=Homo sapiens OX=9606 GN=HSPA4 PE=1 SV=4
E9PNW4|E9PNW4_HUMAN	892000	1000000	909000	970000	1060000	1150000	1	1.12	1.02	1.09	1.18	1.29	CD59 glycoprotein OS=Homo sapiens OX=9606 PE=1 SV=1
A0A2U3TZL5|A0A2U3TZL5_HUMAN	892000	1000000	909000	970000	1060000	1150000	1	1.12	1.02	1.09	1.18	1.29	CD59 glycoprotein (Fragment) OS=Homo sapiens OX=9606 GN=CD59 PE=1 SV=1
sp|P13987|CD59_HUMAN	892000	1000000	909000	970000	1060000	1150000	1	1.12	1.02	1.09	1.18	1.29	CD59 glycoprotein OS=Homo sapiens OX=9606 GN=CD59 PE=1 SV=1
D6RBL5|D6RBL5_HUMAN	1880000	1460000	1680000	1800000	327000	332000	1	0.78	0.9	0.96	0.17	0.18	Annexin OS=Homo sapiens OX=9606 GN=ANXA5 PE=1 SV=1
sp|P08758|ANXA5_HUMAN	1880000	1460000	1680000	1800000	327000	332000	1	0.78	0.9	0.96	0.17	0.18	Annexin A5 OS=Homo sapiens OX=9606 GN=ANXA5 PE=1 SV=2
A0A7I2V2R3|A0A7I2V2R3_HUMAN	4120000	2760000	4400000	3350000	793000	686000	1	0.67	1.07	0.81	0.19	0.17	Heterogeneous nuclear ribonucleoprotein A3 OS=Homo sapiens OX=9606 GN=HNRNPA3 PE=1 SV=1
A0A7I2V5D8|A0A7I2V5D8_HUMAN	4120000	2760000	4400000	3350000	793000	686000	1	0.67	1.07	0.81	0.19	0.17	Heterogeneous nuclear ribonucleoprotein A3 OS=Homo sapiens OX=9606 GN=HNRNPA3 PE=1 SV=1
sp|P51991|ROA3_HUMAN	4120000	2760000	4400000	3350000	793000	686000	1	0.67	1.07	0.81	0.19	0.17	Heterogeneous nuclear ribonucleoprotein A3 OS=Homo sapiens OX=9606 GN=HNRNPA3 PE=1 SV=2
A0A7I2V4J6|A0A7I2V4J6_HUMAN	4120000	2760000	4400000	3350000	793000	686000	1	0.67	1.07	0.81	0.19	0.17	Heterogeneous nuclear ribonucleoprotein A3 OS=Homo sapiens OX=9606 GN=HNRNPA3 PE=1 SV=1
A0A7I2V402|A0A7I2V402_HUMAN	4120000	2760000	4400000	3350000	793000	686000	1	0.67	1.07	0.81	0.19	0.17	Heterogeneous nuclear ribonucleoprotein A3 OS=Homo sapiens OX=9606 GN=HNRNPA3 PE=1 SV=1
sp|Q14766|LTBP1_HUMAN	1430000	1400000	1650000	1060000	860000	1140000	1	0.98	1.16	0.74	0.6	0.8	Latent-transforming growth factor beta-binding protein 1 OS=Homo sapiens OX=9606 GN=LTBP1 PE=1 SV=4
B8ZZW7|B8ZZW7_HUMAN	79300000	145000000	53000000	293000000	2590000	15100000	1	1.82	0.67	3.69	0.03	0.19	Prothymosin alpha OS=Homo sapiens OX=9606 GN=PTMA PE=1 SV=1
B8ZZQ6|B8ZZQ6_HUMAN	79300000	145000000	53000000	293000000	2590000	15100000	1	1.82	0.67	3.69	0.03	0.19	Prothymosin alpha OS=Homo sapiens OX=9606 GN=PTMA PE=1 SV=1
sp|P06454|PTMA_HUMAN	79300000	145000000	53000000	293000000	2590000	15100000	1	1.82	0.67	3.69	0.03	0.19	Prothymosin alpha OS=Homo sapiens OX=9606 GN=PTMA PE=1 SV=2
B8ZZA1|B8ZZA1_HUMAN	79300000	145000000	53000000	293000000	2590000	15100000	1	1.82	0.67	3.69	0.03	0.19	Prothymosin alpha OS=Homo sapiens OX=9606 GN=PTMA PE=1 SV=1
H7C2N1|H7C2N1_HUMAN	79300000	145000000	53000000	293000000	2590000	15100000	1	1.82	0.67	3.69	0.03	0.19	Prothymosin alpha (Fragment) OS=Homo sapiens OX=9606 GN=PTMA PE=1 SV=1
sp|P07384|CAN1_HUMAN	1150000	1230000	927000	838000	1270000	1020000	1	1.07	0.81	0.73	1.11	0.89	Calpain-1 catalytic subunit OS=Homo sapiens OX=9606 GN=CAPN1 PE=1 SV=1
sp|P13727|PRG2_HUMAN	767000	1510000	661000	519000	640000	927000	1	1.97	0.86	0.68	0.83	1.21	Bone marrow proteoglycan OS=Homo sapiens OX=9606 GN=PRG2 PE=1 SV=2
sp|P01709|LV208_HUMAN	46000000	56200000	30400000	35700000	42100000	38100000	1	1.22	0.66	0.78	0.92	0.83	Immunoglobulin lambda variable 2-8 OS=Homo sapiens OX=9606 GN=IGLV2-8 PE=1 SV=2
sp|P01599|KV117_HUMAN	866000	1290000	828000	962000	1130000	1080000	1	1.49	0.96	1.11	1.3	1.25	Immunoglobulin kappa variable 1-17 OS=Homo sapiens OX=9606 GN=IGKV1-17 PE=1 SV=2
sp|P16403|H12_HUMAN	2090000	906000	2080000	1060000	232000	176000	1	0.43	1	0.51	0.11	0.08	Histone H1.2 OS=Homo sapiens OX=9606 GN=H1-2 PE=1 SV=2
sp|Q86UX7|URP2_HUMAN	1420000	1130000	733000	529000	854000	1090000	1	0.79	0.52	0.37	0.6	0.77	Fermitin family homolog 3 OS=Homo sapiens OX=9606 GN=FERMT3 PE=1 SV=1
sp|P33908|MA1A1_HUMAN	2410000	2880000	2550000	2000000	2210000	2210000	1	1.19	1.06	0.83	0.92	0.92	Mannosyl-oligosaccharide 1 2-alpha-mannosidase IA OS=Homo sapiens OX=9606 GN=MAN1A1 PE=1 SV=3
sp|Q9Y240|CLC11_HUMAN	640000	711000	674000	556000	525000	657000	1	1.11	1.05	0.87	0.82	1.03	C-type lectin domain family 11 member A OS=Homo sapiens OX=9606 GN=CLEC11A PE=1 SV=1
sp|Q15848|ADIPO_HUMAN	2340000	5740000	3510000	3540000	2480000	3320000	1	2.45	1.5	1.51	1.06	1.42	Adiponectin OS=Homo sapiens OX=9606 GN=ADIPOQ PE=1 SV=1
sp|A0A0C4DH34|HV428_HUMAN	27400000	31700000	31500000	37200000	31100000	37000000	1	1.16	1.15	1.36	1.14	1.35	Immunoglobulin heavy variable 4-28 OS=Homo sapiens OX=9606 GN=IGHV4-28 PE=3 SV=1
B4DNG0|B4DNG0_HUMAN	1270000	1480000	1440000	1320000	1150000	1480000	1	1.17	1.14	1.04	0.9	1.17	Olfactomedin-like protein 3 OS=Homo sapiens OX=9606 GN=OLFML3 PE=1 SV=1
sp|Q9NRN5|OLFL3_HUMAN	1270000	1480000	1440000	1320000	1150000	1480000	1	1.17	1.14	1.04	0.9	1.17	Olfactomedin-like protein 3 OS=Homo sapiens OX=9606 GN=OLFML3 PE=2 SV=1
A0A1W2PPQ2|A0A1W2PPQ2_HUMAN	1470000	1690000	1420000	1020000	1330000	1520000	1	1.15	0.97	0.69	0.91	1.04	HLA class I histocompatibility antigen A alpha chain OS=Homo sapiens OX=9606 GN=HLA-A PE=1 SV=1
A0A140T955|A0A140T955_HUMAN	1470000	1690000	1420000	1020000	1330000	1520000	1	1.15	0.97	0.69	0.91	1.04	HLA class I histocompatibility antigen A alpha chain OS=Homo sapiens OX=9606 GN=HLA-A PE=1 SV=1
A0A140T933|A0A140T933_HUMAN	1470000	1690000	1420000	1020000	1330000	1520000	1	1.15	0.97	0.69	0.91	1.04	HLA class I histocompatibility antigen A alpha chain (Fragment) OS=Homo sapiens OX=9606 GN=HLA-A PE=1 SV=1
A0A1W2PRT9|A0A1W2PRT9_HUMAN	1470000	1690000	1420000	1020000	1330000	1520000	1	1.15	0.97	0.69	0.91	1.04	HLA class I histocompatibility antigen A alpha chain OS=Homo sapiens OX=9606 GN=HLA-A PE=1 SV=1
Q53Z42|Q53Z42_HUMAN	1470000	1690000	1420000	1020000	1330000	1520000	1	1.15	0.97	0.69	0.91	1.04	HLA class I antigen OS=Homo sapiens OX=9606 GN=HLA-A PE=1 SV=1
A0A140T9I0|A0A140T9I0_HUMAN	1470000	1690000	1420000	1020000	1330000	1520000	1	1.15	0.97	0.69	0.91	1.04	HLA class I histocompatibility antigen A alpha chain (Fragment) OS=Homo sapiens OX=9606 GN=HLA-A PE=1 SV=1
A0A140T913|A0A140T913_HUMAN	1470000	1690000	1420000	1020000	1330000	1520000	1	1.15	0.97	0.69	0.91	1.04	HLA class I histocompatibility antigen A alpha chain OS=Homo sapiens OX=9606 GN=HLA-A PE=1 SV=1
A0A140T9X5|A0A140T9X5_HUMAN	1470000	1690000	1420000	1020000	1330000	1520000	1	1.15	0.97	0.69	0.91	1.04	HLA class I histocompatibility antigen A alpha chain (Fragment) OS=Homo sapiens OX=9606 GN=HLA-A PE=1 SV=1
Q5SRN7|Q5SRN7_HUMAN	1470000	1690000	1420000	1020000	1330000	1520000	1	1.15	0.97	0.69	0.91	1.04	HLA class I histocompatibility antigen A alpha chain OS=Homo sapiens OX=9606 GN=HLA-A PE=1 SV=2
A0A1W2PS24|A0A1W2PS24_HUMAN	1470000	1690000	1420000	1020000	1330000	1520000	1	1.15	0.97	0.69	0.91	1.04	HLA class I histocompatibility antigen A alpha chain OS=Homo sapiens OX=9606 GN=HLA-A PE=1 SV=1
sp|P04439|HLAA_HUMAN	1470000	1690000	1420000	1020000	1330000	1520000	1	1.15	0.97	0.69	0.91	1.04	HLA class I histocompatibility antigen A alpha chain OS=Homo sapiens OX=9606 GN=HLA-A PE=1 SV=2
Q5SRN5|Q5SRN5_HUMAN	1470000	1690000	1420000	1020000	1330000	1520000	1	1.15	0.97	0.69	0.91	1.04	HLA class I histocompatibility antigen A alpha chain OS=Homo sapiens OX=9606 GN=HLA-A PE=1 SV=2
sp|A0A0A0MS14|HV145_HUMAN	11900000	6110000	8390000	7460000	5250000	6690000	1	0.52	0.71	0.63	0.44	0.56	Immunoglobulin heavy variable 1-45 OS=Homo sapiens OX=9606 GN=IGHV1-45 PE=3 SV=1
sp|Q9NZ45|CISD1_HUMAN	966000	835000	1340000	832000	417000	357000	1	0.86	1.38	0.86	0.43	0.37	CDGSH iron-sulfur domain-containing protein 1 OS=Homo sapiens OX=9606 GN=CISD1 PE=1 SV=1
sp|P63313|TYB10_HUMAN	10900000	21800000	7720000	19100000	7970000	6150000	1	2.01	0.71	1.76	0.73	0.57	Thymosin beta-10 OS=Homo sapiens OX=9606 GN=TMSB10 PE=1 SV=2
sp|Q16576|RBBP7_HUMAN	926000	804000	1050000	878000	516000	409000	1	0.87	1.13	0.95	0.56	0.44	Histone-binding protein RBBP7 OS=Homo sapiens OX=9606 GN=RBBP7 PE=1 SV=1
E9PC52|E9PC52_HUMAN	926000	804000	1050000	878000	516000	409000	1	0.87	1.13	0.95	0.56	0.44	Histone-binding protein RBBP7 OS=Homo sapiens OX=9606 GN=RBBP7 PE=1 SV=1
Q5JP01|Q5JP01_HUMAN	926000	804000	1050000	878000	516000	409000	1	0.87	1.13	0.95	0.56	0.44	Histone-binding protein RBBP7 (Fragment) OS=Homo sapiens OX=9606 GN=RBBP7 PE=1 SV=1
sp|A0A0C4DH67|KV108_HUMAN	1510000	1160000	973000	1360000	1080000	1040000	1	0.77	0.64	0.9	0.71	0.69	Immunoglobulin kappa variable 1-8 OS=Homo sapiens OX=9606 GN=IGKV1-8 PE=3 SV=1
H0YN18|H0YN18_HUMAN	3980000	3500000	3850000	4130000	852000	1000000	1	0.88	0.97	1.04	0.21	0.25	Proteasome subunit alpha type-4 OS=Homo sapiens OX=9606 GN=PSMA4 PE=1 SV=1
sp|P25789|PSA4_HUMAN	3980000	3500000	3850000	4130000	852000	1000000	1	0.88	0.97	1.04	0.21	0.25	Proteasome subunit alpha type-4 OS=Homo sapiens OX=9606 GN=PSMA4 PE=1 SV=1
sp|P16112|PGCA_HUMAN	971000	850000	919000	720000	989000	853000	1	0.88	0.95	0.74	1.02	0.88	Aggrecan core protein OS=Homo sapiens OX=9606 GN=ACAN PE=1 SV=3
sp|P16284|PECA1_HUMAN	250000	338000	259000	639000	226000	73600	1	1.35	1.03	2.55	0.9	0.29	Platelet endothelial cell adhesion molecule OS=Homo sapiens OX=9606 GN=PECAM1 PE=1 SV=2
sp|Q9NSB4|KRT82_HUMAN	190000	343000	834000	220000	1670000	307000	1	1.81	4.39	1.16	8.76	1.62	Keratin type II cuticular Hb2 OS=Homo sapiens OX=9606 GN=KRT82 PE=1 SV=3
sp|Q9H1E3|NUCKS_HUMAN	2090000	2010000	1430000	3040000	300000	411000	1	0.96	0.69	1.46	0.14	0.2	Nuclear ubiquitous casein and cyclin-dependent kinase substrate 1 OS=Homo sapiens OX=9606 GN=NUCKS1 PE=1 SV=1
sp|P10586|PTPRF_HUMAN	363000	402000	375000	433000	362000	411000	1	1.11	1.03	1.19	1	1.13	Receptor-type tyrosine-protein phosphatase F OS=Homo sapiens OX=9606 GN=PTPRF PE=1 SV=2
sp|P23468|PTPRD_HUMAN	363000	402000	375000	433000	362000	411000	1	1.11	1.03	1.19	1	1.13	Receptor-type tyrosine-protein phosphatase delta OS=Homo sapiens OX=9606 GN=PTPRD PE=1 SV=2
Q3KPI9|Q3KPI9_HUMAN	363000	402000	375000	433000	362000	411000	1	1.11	1.03	1.19	1	1.13	Protein-tyrosine-phosphatase OS=Homo sapiens OX=9606 GN=PTPRD PE=1 SV=1
F5GWR7|F5GWR7_HUMAN	363000	402000	375000	433000	362000	411000	1	1.11	1.03	1.19	1	1.13	Protein-tyrosine-phosphatase OS=Homo sapiens OX=9606 GN=PTPRD PE=1 SV=1
A2A437|A2A437_HUMAN	363000	402000	375000	433000	362000	411000	1	1.11	1.03	1.19	1	1.13	Receptor-type tyrosine-protein phosphatase F (Fragment) OS=Homo sapiens OX=9606 GN=PTPRF PE=1 SV=1
sp|P01344|IGF2_HUMAN	1200000	936000	1100000	1160000	977000	988000	1	0.78	0.92	0.97	0.81	0.82	Insulin-like growth factor II OS=Homo sapiens OX=9606 GN=IGF2 PE=1 SV=1
H3BPS8|H3BPS8_HUMAN	1050000	1040000	836000	736000	944000	881000	1	0.99	0.79	0.7	0.9	0.84	Fructose-bisphosphate aldolase (Fragment) OS=Homo sapiens OX=9606 GN=ALDOA PE=1 SV=1
H3BQN4|H3BQN4_HUMAN	1050000	1040000	836000	736000	944000	881000	1	0.99	0.79	0.7	0.9	0.84	Fructose-bisphosphate aldolase OS=Homo sapiens OX=9606 GN=ALDOA PE=1 SV=1
sp|P04075|ALDOA_HUMAN	1050000	1040000	836000	736000	944000	881000	1	0.99	0.79	0.7	0.9	0.84	Fructose-bisphosphate aldolase A OS=Homo sapiens OX=9606 GN=ALDOA PE=1 SV=2
J3KPS3|J3KPS3_HUMAN	1050000	1040000	836000	736000	944000	881000	1	0.99	0.79	0.7	0.9	0.84	Fructose-bisphosphate aldolase OS=Homo sapiens OX=9606 GN=ALDOA PE=1 SV=1
sp|P07305|H10_HUMAN	5100000	4140000	6530000	4520000	1190000	895000	1	0.81	1.28	0.89	0.23	0.18	Histone H1.0 OS=Homo sapiens OX=9606 GN=H1-0 PE=1 SV=3
sp|Q02413|DSG1_HUMAN	140000	267000	162000	169000	274000	211000	1	1.9	1.16	1.2	1.96	1.51	Desmoglein-1 OS=Homo sapiens OX=9606 GN=DSG1 PE=1 SV=2
sp|Q9C0C2|TB182_HUMAN	1050000	985000	1130000	1110000	327000	345000	1	0.94	1.07	1.05	0.31	0.33	182 kDa tankyrase-1-binding protein OS=Homo sapiens OX=9606 GN=TNKS1BP1 PE=1 SV=4
A0A0A0MSA9|A0A0A0MSA9_HUMAN	395000	406000	500000	452000	283000	341000	1	1.03	1.27	1.14	0.72	0.86	Poliovirus receptor OS=Homo sapiens OX=9606 GN=PVR PE=1 SV=1
A0A0C4DG49|A0A0C4DG49_HUMAN	395000	406000	500000	452000	283000	341000	1	1.03	1.27	1.14	0.72	0.86	Poliovirus receptor OS=Homo sapiens OX=9606 GN=PVR PE=1 SV=1
sp|P15151|PVR_HUMAN	395000	406000	500000	452000	283000	341000	1	1.03	1.27	1.14	0.72	0.86	Poliovirus receptor OS=Homo sapiens OX=9606 GN=PVR PE=1 SV=2
sp|P08253|MMP2_HUMAN	947000	799000	901000	942000	692000	921000	1	0.84	0.95	1	0.73	0.97	72 kDa type IV collagenase OS=Homo sapiens OX=9606 GN=MMP2 PE=1 SV=2
sp|P29373|RABP2_HUMAN	230000	336000	244000	580000	122000	166000	1	1.46	1.06	2.52	0.53	0.72	Cellular retinoic acid-binding protein 2 OS=Homo sapiens OX=9606 GN=CRABP2 PE=1 SV=2
sp|A0A075B6K6|LV403_HUMAN	704000	1060000	1300000	1290000	1390000	1570000	1	1.51	1.84	1.83	1.97	2.23	Immunoglobulin lambda variable 4-3 OS=Homo sapiens OX=9606 GN=IGLV4-3 PE=3 SV=1
sp|P01602|KV105_HUMAN	126000000	252000000	143000000	168000000	128000000	152000000	1	2	1.13	1.33	1.02	1.2	Immunoglobulin kappa variable 1-5 OS=Homo sapiens OX=9606 GN=IGKV1-5 PE=1 SV=2
sp|O43852|CALU_HUMAN	1920000	2070000	1920000	2310000	942000	743000	1	1.08	1	1.2	0.49	0.39	Calumenin OS=Homo sapiens OX=9606 GN=CALU PE=1 SV=2
A9Z1X7|A9Z1X7_HUMAN	3220000	2530000	4150000	2980000	309000	298000	1	0.78	1.29	0.92	0.1	0.09	Serine/arginine repetitive matrix protein 1 OS=Homo sapiens OX=9606 GN=SRRM1 PE=1 SV=1
sp|Q8IYB3|SRRM1_HUMAN	3220000	2530000	4150000	2980000	309000	298000	1	0.78	1.29	0.92	0.1	0.09	Serine/arginine repetitive matrix protein 1 OS=Homo sapiens OX=9606 GN=SRRM1 PE=1 SV=2
sp|P47813|IF1AX_HUMAN	3680000	2870000	4330000	3870000	1470000	1330000	1	0.78	1.18	1.05	0.4	0.36	Eukaryotic translation initiation factor 1A X-chromosomal OS=Homo sapiens OX=9606 GN=EIF1AX PE=1 SV=2
X6RAC9|X6RAC9_HUMAN	3680000	2870000	4330000	3870000	1470000	1330000	1	0.78	1.18	1.05	0.4	0.36	Eukaryotic translation initiation factor 4C OS=Homo sapiens OX=9606 GN=EIF1AX PE=1 SV=1
A6NJH9|A6NJH9_HUMAN	3680000	2870000	4330000	3870000	1470000	1330000	1	0.78	1.18	1.05	0.4	0.36	Eukaryotic translation initiation factor 4C OS=Homo sapiens OX=9606 GN=EIF1AY PE=1 SV=1
sp|O14602|IF1AY_HUMAN	3680000	2870000	4330000	3870000	1470000	1330000	1	0.78	1.18	1.05	0.4	0.36	Eukaryotic translation initiation factor 1A Y-chromosomal OS=Homo sapiens OX=9606 GN=EIF1AY PE=1 SV=4
sp|Q03252|LMNB2_HUMAN	3960000	2900000	4040000	2280000	1380000	1460000	1	0.73	1.02	0.58	0.35	0.37	Lamin-B2 OS=Homo sapiens OX=9606 GN=LMNB2 PE=1 SV=4
sp|Q13822|ENPP2_HUMAN	517000	669000	596000	809000	1230000	841000	1	1.29	1.15	1.56	2.38	1.63	Ectonucleotide pyrophosphatase/phosphodiesterase family member 2 OS=Homo sapiens OX=9606 GN=ENPP2 PE=1 SV=3
E7EUF1|E7EUF1_HUMAN	517000	669000	596000	809000	1230000	841000	1	1.29	1.15	1.56	2.38	1.63	Ectonucleotide pyrophosphatase/phosphodiesterase family member 2 OS=Homo sapiens OX=9606 GN=ENPP2 PE=1 SV=1
E5RIB9|E5RIB9_HUMAN	517000	669000	596000	809000	1230000	841000	1	1.29	1.15	1.56	2.38	1.63	Ectonucleotide pyrophosphatase/phosphodiesterase family member 2 OS=Homo sapiens OX=9606 GN=ENPP2 PE=1 SV=1
E5RJ49|E5RJ49_HUMAN	517000	669000	596000	809000	1230000	841000	1	1.29	1.15	1.56	2.38	1.63	Ectonucleotide pyrophosphatase/phosphodiesterase family member 2 (Fragment) OS=Homo sapiens OX=9606 GN=ENPP2 PE=1 SV=1
H0YKD8|H0YKD8_HUMAN	2380000	2120000	3030000	2170000	1440000	901000	1	0.89	1.28	0.91	0.61	0.38	60S ribosomal protein L28 OS=Homo sapiens OX=9606 GN=RPL28 PE=1 SV=1
sp|P46779|RL28_HUMAN	2380000	2120000	3030000	2170000	1440000	901000	1	0.89	1.28	0.91	0.61	0.38	60S ribosomal protein L28 OS=Homo sapiens OX=9606 GN=RPL28 PE=1 SV=3
H0YLP6|H0YLP6_HUMAN	2380000	2120000	3030000	2170000	1440000	901000	1	0.89	1.28	0.91	0.61	0.38	60S ribosomal protein L28 OS=Homo sapiens OX=9606 GN=RPL28 PE=1 SV=1
H0YMF4|H0YMF4_HUMAN	2380000	2120000	3030000	2170000	1440000	901000	1	0.89	1.28	0.91	0.61	0.38	60S ribosomal protein L28 OS=Homo sapiens OX=9606 GN=RPL28 PE=1 SV=1
B4DFW2|B4DFW2_HUMAN	1620000	3950000	1550000	1350000	1160000	1320000	1	2.44	0.95	0.83	0.71	0.82	Metalloproteinase inhibitor 2 OS=Homo sapiens OX=9606 GN=TIMP2 PE=1 SV=1
sp|P16035|TIMP2_HUMAN	1620000	3950000	1550000	1350000	1160000	1320000	1	2.44	0.95	0.83	0.71	0.82	Metalloproteinase inhibitor 2 OS=Homo sapiens OX=9606 GN=TIMP2 PE=1 SV=2
D6R9A6|D6R9A6_HUMAN	547000	588000	639000	693000	225000	163000	1	1.08	1.17	1.27	0.41	0.3	High mobility group protein B2 (Fragment) OS=Homo sapiens OX=9606 GN=HMGB2 PE=1 SV=1
sp|P26583|HMGB2_HUMAN	547000	588000	639000	693000	225000	163000	1	1.08	1.17	1.27	0.41	0.3	High mobility group protein B2 OS=Homo sapiens OX=9606 GN=HMGB2 PE=1 SV=2
A2A299|A2A299_HUMAN	177000	170000	186000	186000	114000	429000	1	0.96	1.05	1.06	0.64	2.43	Protein-glutamine gamma-glutamyltransferase 2 (Fragment) OS=Homo sapiens OX=9606 GN=TGM2 PE=1 SV=8
sp|Q9BXX0|EMIL2_HUMAN	5280000	4760000	5010000	3640000	363000	501000	1	0.9	0.95	0.69	0.07	0.09	EMILIN-2 OS=Homo sapiens OX=9606 GN=EMILIN2 PE=1 SV=3
sp|P29966|MARCS_HUMAN	3460000	4580000	3860000	4390000	1210000	1130000	1	1.32	1.11	1.27	0.35	0.33	Myristoylated alanine-rich C-kinase substrate OS=Homo sapiens OX=9606 GN=MARCKS PE=1 SV=4
sp|P01704|LV214_HUMAN	12500000	11300000	7000000	8730000	11300000	12100000	1	0.91	0.56	0.7	0.91	0.97	Immunoglobulin lambda variable 2-14 OS=Homo sapiens OX=9606 GN=IGLV2-14 PE=1 SV=2
Q86UZ1|Q86UZ1_HUMAN	6110000	5670000	5670000	4280000	5160000	4980000	1	0.93	0.93	0.7	0.84	0.81	CD44 antigen OS=Homo sapiens OX=9606 GN=CD44 PE=1 SV=1
sp|P16070|CD44_HUMAN	6110000	5670000	5670000	4280000	5160000	4980000	1	0.93	0.93	0.7	0.84	0.81	CD44 antigen OS=Homo sapiens OX=9606 GN=CD44 PE=1 SV=3
H0YD13|H0YD13_HUMAN	6110000	5670000	5670000	4280000	5160000	4980000	1	0.93	0.93	0.7	0.84	0.81	CD44 antigen OS=Homo sapiens OX=9606 GN=CD44 PE=1 SV=2
E9PKC6|E9PKC6_HUMAN	6110000	5670000	5670000	4280000	5160000	4980000	1	0.93	0.93	0.7	0.84	0.81	CD44 antigen OS=Homo sapiens OX=9606 GN=CD44 PE=1 SV=1
H0YDW7|H0YDW7_HUMAN	6110000	5670000	5670000	4280000	5160000	4980000	1	0.93	0.93	0.7	0.84	0.81	CD44 antigen (Fragment) OS=Homo sapiens OX=9606 GN=CD44 PE=1 SV=2
H0YCV9|H0YCV9_HUMAN	6110000	5670000	5670000	4280000	5160000	4980000	1	0.93	0.93	0.7	0.84	0.81	CD44 antigen (Fragment) OS=Homo sapiens OX=9606 GN=CD44 PE=1 SV=2
H0Y5E4|H0Y5E4_HUMAN	6110000	5670000	5670000	4280000	5160000	4980000	1	0.93	0.93	0.7	0.84	0.81	CD44 antigen (Fragment) OS=Homo sapiens OX=9606 GN=CD44 PE=1 SV=1
sp|P30041|PRDX6_HUMAN	426000	545000	400000	410000	662000	615000	1	1.28	0.94	0.96	1.55	1.44	Peroxiredoxin-6 OS=Homo sapiens OX=9606 GN=PRDX6 PE=1 SV=3
C9JH19|C9JH19_HUMAN	1480000	1680000	1660000	1380000	1510000	1280000	1	1.13	1.12	0.93	1.02	0.86	Cathepsin D OS=Homo sapiens OX=9606 GN=CTSD PE=1 SV=2
F8W787|F8W787_HUMAN	1480000	1680000	1660000	1380000	1510000	1280000	1	1.13	1.12	0.93	1.02	0.86	Cathepsin D OS=Homo sapiens OX=9606 GN=CTSD PE=1 SV=2
A0A1B0GW44|A0A1B0GW44_HUMAN	1480000	1680000	1660000	1380000	1510000	1280000	1	1.13	1.12	0.93	1.02	0.86	Cathepsin D OS=Homo sapiens OX=9606 GN=CTSD PE=1 SV=1
A0A1B0GVP3|A0A1B0GVP3_HUMAN	1480000	1680000	1660000	1380000	1510000	1280000	1	1.13	1.12	0.93	1.02	0.86	Cathepsin D OS=Homo sapiens OX=9606 GN=CTSD PE=1 SV=1
A0A1B0GV23|A0A1B0GV23_HUMAN	1480000	1680000	1660000	1380000	1510000	1280000	1	1.13	1.12	0.93	1.02	0.86	Cathepsin D OS=Homo sapiens OX=9606 GN=CTSD PE=1 SV=1
A0A1B0GVD5|A0A1B0GVD5_HUMAN	1480000	1680000	1660000	1380000	1510000	1280000	1	1.13	1.12	0.93	1.02	0.86	Cathepsin D OS=Homo sapiens OX=9606 GN=CTSD PE=1 SV=1
A0A1B0GWE8|A0A1B0GWE8_HUMAN	1480000	1680000	1660000	1380000	1510000	1280000	1	1.13	1.12	0.93	1.02	0.86	Cathepsin D OS=Homo sapiens OX=9606 GN=CTSD PE=1 SV=1
sp|P07339|CATD_HUMAN	1480000	1680000	1660000	1380000	1510000	1280000	1	1.13	1.12	0.93	1.02	0.86	Cathepsin D OS=Homo sapiens OX=9606 GN=CTSD PE=1 SV=1
B4DT28|B4DT28_HUMAN	10100000	5350000	10000000	5960000	1240000	1180000	1	0.53	0.99	0.59	0.12	0.12	Heterogeneous nuclear ribonucleoprotein R OS=Homo sapiens OX=9606 GN=HNRNPR PE=1 SV=1
sp|O43390|HNRPR_HUMAN	10100000	5350000	10000000	5960000	1240000	1180000	1	0.53	0.99	0.59	0.12	0.12	Heterogeneous nuclear ribonucleoprotein R OS=Homo sapiens OX=9606 GN=HNRNPR PE=1 SV=1
A0A6Q8PH35|A0A6Q8PH35_HUMAN	10100000	5350000	10000000	5960000	1240000	1180000	1	0.53	0.99	0.59	0.12	0.12	Heterogeneous nuclear ribonucleoprotein R OS=Homo sapiens OX=9606 GN=HNRNPR PE=4 SV=1
A0A6Q8PH31|A0A6Q8PH31_HUMAN	10100000	5350000	10000000	5960000	1240000	1180000	1	0.53	0.99	0.59	0.12	0.12	Heterogeneous nuclear ribonucleoprotein R (Fragment) OS=Homo sapiens OX=9606 GN=HNRNPR PE=4 SV=1
A0A6Q8PEX7|A0A6Q8PEX7_HUMAN	10100000	5350000	10000000	5960000	1240000	1180000	1	0.53	0.99	0.59	0.12	0.12	Heterogeneous nuclear ribonucleoprotein R (Fragment) OS=Homo sapiens OX=9606 GN=HNRNPR PE=4 SV=1
F5GX88|F5GX88_HUMAN	499000	460000	510000	510000	404000	343000	1	0.92	1.02	1.02	0.81	0.69	Endoglin OS=Homo sapiens OX=9606 GN=ENG PE=1 SV=1
sp|P17813|EGLN_HUMAN	499000	460000	510000	510000	404000	343000	1	0.92	1.02	1.02	0.81	0.69	Endoglin OS=Homo sapiens OX=9606 GN=ENG PE=1 SV=2
Q6P452|Q6P452_HUMAN	1640000	956000	1210000	1300000	309000	313000	1	0.58	0.74	0.79	0.19	0.19	Annexin OS=Homo sapiens OX=9606 GN=ANXA4 PE=1 SV=1
sp|P09525|ANXA4_HUMAN	1640000	956000	1210000	1300000	309000	313000	1	0.58	0.74	0.79	0.19	0.19	Annexin A4 OS=Homo sapiens OX=9606 GN=ANXA4 PE=1 SV=4
sp|Q8WZ42|TITIN_HUMAN	4650000	5820000	5200000	6540000	5310000	6590000	1	1.25	1.12	1.41	1.14	1.42	Titin OS=Homo sapiens OX=9606 GN=TTN PE=1 SV=4
A0A0A0MTS7|A0A0A0MTS7_HUMAN	4650000	5820000	5200000	6540000	5310000	6590000	1	1.25	1.12	1.41	1.14	1.42	Titin OS=Homo sapiens OX=9606 GN=TTN PE=1 SV=1
sp|P05019|IGF1_HUMAN	551000	715000	770000	845000	659000	781000	1	1.3	1.4	1.54	1.2	1.42	Insulin-like growth factor I OS=Homo sapiens OX=9606 GN=IGF1 PE=1 SV=1
sp|P55290|CAD13_HUMAN	744000	560000	689000	634000	641000	619000	1	0.75	0.93	0.85	0.86	0.83	Cadherin-13 OS=Homo sapiens OX=9606 GN=CDH13 PE=1 SV=1
sp|Q13418|ILK_HUMAN	2470000	2250000	2060000	1320000	1180000	1200000	1	0.91	0.83	0.54	0.48	0.49	Integrin-linked protein kinase OS=Homo sapiens OX=9606 GN=ILK PE=1 SV=2
A0A0A0MTH3|A0A0A0MTH3_HUMAN	2470000	2250000	2060000	1320000	1180000	1200000	1	0.91	0.83	0.54	0.48	0.49	59 kDa serine/threonine-protein kinase OS=Homo sapiens OX=9606 GN=ILK PE=1 SV=1
A0A096LP69|A0A096LP69_HUMAN	388000	229000	356000	264000	212000	171000	1	0.59	0.92	0.68	0.55	0.44	CD99 antigen OS=Homo sapiens OX=9606 GN=CD99 PE=1 SV=1
sp|P14209|CD99_HUMAN	388000	229000	356000	264000	212000	171000	1	0.59	0.92	0.68	0.55	0.44	CD99 antigen OS=Homo sapiens OX=9606 GN=CD99 PE=1 SV=1
sp|A0A0A0MT89|KJ01_HUMAN	2780000	1900000	2430000	2330000	1410000	1800000	1	0.68	0.87	0.84	0.51	0.65	Immunoglobulin kappa joining 1 OS=Homo sapiens OX=9606 GN=IGKJ1 PE=4 SV=2
A0A0J9YVU5|A0A0J9YVU5_HUMAN	3270000	6980000	5130000	5880000	6600000	8580000	1	2.14	1.57	1.8	2.02	2.62	Immunoglobulin heavy variable 2-70 (Fragment) OS=Homo sapiens OX=9606 GN=IGHV2-70 PE=1 SV=1
sp|Q99832|TCPH_HUMAN	1560000	1480000	1560000	1300000	599000	560000	1	0.95	1	0.83	0.38	0.36	T-complex protein 1 subunit eta OS=Homo sapiens OX=9606 GN=CCT7 PE=1 SV=2
sp|P02741|CRP_HUMAN	1230000	2720000	1390000	1400000	7670000	1760000	1	2.2	1.13	1.14	6.21	1.43	C-reactive protein OS=Homo sapiens OX=9606 GN=CRP PE=1 SV=1
Q5VVP7|Q5VVP7_HUMAN	1230000	2720000	1390000	1400000	7670000	1760000	1	2.2	1.13	1.14	6.21	1.43	C-reactive protein OS=Homo sapiens OX=9606 GN=CRP PE=1 SV=1
sp|Q14126|DSG2_HUMAN	518000	486000	466000	500000	595000	415000	1	0.94	0.9	0.97	1.15	0.8	Desmoglein-2 OS=Homo sapiens OX=9606 GN=DSG2 PE=1 SV=2
sp|Q9UEW3|MARCO_HUMAN	357000	483000	305000	357000	294000	498000	1	1.35	0.85	1	0.82	1.4	Macrophage receptor MARCO OS=Homo sapiens OX=9606 GN=MARCO PE=1 SV=1
sp|P01703|LV140_HUMAN	15100000	19700000	13300000	11800000	11700000	11200000	1	1.3	0.88	0.78	0.77	0.74	Immunoglobulin lambda variable 1-40 OS=Homo sapiens OX=9606 GN=IGLV1-40 PE=1 SV=2
sp|P22531|SPR2E_HUMAN	3910000	2970000	2800000	4780000	567000	646000	1	0.76	0.71	1.22	0.15	0.17	Small proline-rich protein 2E OS=Homo sapiens OX=9606 GN=SPRR2E PE=2 SV=2
sp|P35325|SPR2B_HUMAN	3910000	2970000	2800000	4780000	567000	646000	1	0.76	0.71	1.22	0.15	0.17	Small proline-rich protein 2B OS=Homo sapiens OX=9606 GN=SPRR2B PE=2 SV=1
sp|P35326|SPR2A_HUMAN	3910000	2970000	2800000	4780000	567000	646000	1	0.76	0.71	1.22	0.15	0.17	Small proline-rich protein 2A OS=Homo sapiens OX=9606 GN=SPRR2A PE=1 SV=1
sp|Q96RM1|SPR2F_HUMAN	3910000	2970000	2800000	4780000	567000	646000	1	0.76	0.71	1.22	0.15	0.17	Small proline-rich protein 2F OS=Homo sapiens OX=9606 GN=SPRR2F PE=3 SV=1
sp|P22532|SPR2D_HUMAN	3910000	2970000	2800000	4780000	567000	646000	1	0.76	0.71	1.22	0.15	0.17	Small proline-rich protein 2D OS=Homo sapiens OX=9606 GN=SPRR2D PE=2 SV=2
sp|Q9BYE4|SPR2G_HUMAN	3910000	2970000	2800000	4780000	567000	646000	1	0.76	0.71	1.22	0.15	0.17	Small proline-rich protein 2G OS=Homo sapiens OX=9606 GN=SPRR2G PE=3 SV=1
A0A494C1G1|A0A494C1G1_HUMAN	4250000	5360000	4220000	4460000	2090000	1260000	1	1.26	0.99	1.05	0.49	0.3	Four and a half LIM domains protein 1 (Fragment) OS=Homo sapiens OX=9606 GN=FHL1 PE=1 SV=1
A0A0D9SEY7|A0A0D9SEY7_HUMAN	4250000	5360000	4220000	4460000	2090000	1260000	1	1.26	0.99	1.05	0.49	0.3	Four and a half LIM domains protein 1 (Fragment) OS=Homo sapiens OX=9606 GN=FHL1 PE=1 SV=1
A0A494C0J3|A0A494C0J3_HUMAN	4250000	5360000	4220000	4460000	2090000	1260000	1	1.26	0.99	1.05	0.49	0.3	Four and a half LIM domains protein 1 (Fragment) OS=Homo sapiens OX=9606 GN=FHL1 PE=1 SV=1
A0A0D9SGD1|A0A0D9SGD1_HUMAN	4250000	5360000	4220000	4460000	2090000	1260000	1	1.26	0.99	1.05	0.49	0.3	Four and a half LIM domains protein 1 (Fragment) OS=Homo sapiens OX=9606 GN=FHL1 PE=1 SV=1
A0A0D9SGB2|A0A0D9SGB2_HUMAN	4250000	5360000	4220000	4460000	2090000	1260000	1	1.26	0.99	1.05	0.49	0.3	Four and a half LIM domains protein 1 (Fragment) OS=Homo sapiens OX=9606 GN=FHL1 PE=1 SV=1
Q5JXI0|Q5JXI0_HUMAN	4250000	5360000	4220000	4460000	2090000	1260000	1	1.26	0.99	1.05	0.49	0.3	Four and a half LIM domains protein 1 (Fragment) OS=Homo sapiens OX=9606 GN=FHL1 PE=1 SV=1
A0A0D9SFI6|A0A0D9SFI6_HUMAN	4250000	5360000	4220000	4460000	2090000	1260000	1	1.26	0.99	1.05	0.49	0.3	Four and a half LIM domains protein 1 (Fragment) OS=Homo sapiens OX=9606 GN=FHL1 PE=1 SV=1
A0A0D9SFB0|A0A0D9SFB0_HUMAN	4250000	5360000	4220000	4460000	2090000	1260000	1	1.26	0.99	1.05	0.49	0.3	Four and a half LIM domains protein 1 (Fragment) OS=Homo sapiens OX=9606 GN=FHL1 PE=1 SV=1
Q5JXH9|Q5JXH9_HUMAN	4250000	5360000	4220000	4460000	2090000	1260000	1	1.26	0.99	1.05	0.49	0.3	Four and a half LIM domains protein 1 (Fragment) OS=Homo sapiens OX=9606 GN=FHL1 PE=1 SV=1
A0A0D9SFZ9|A0A0D9SFZ9_HUMAN	4250000	5360000	4220000	4460000	2090000	1260000	1	1.26	0.99	1.05	0.49	0.3	Four and a half LIM domains protein 1 (Fragment) OS=Homo sapiens OX=9606 GN=FHL1 PE=1 SV=1
Q5JXH8|Q5JXH8_HUMAN	4250000	5360000	4220000	4460000	2090000	1260000	1	1.26	0.99	1.05	0.49	0.3	Four and a half LIM domains protein 1 (Fragment) OS=Homo sapiens OX=9606 GN=FHL1 PE=1 SV=1
Q5JXH7|Q5JXH7_HUMAN	4250000	5360000	4220000	4460000	2090000	1260000	1	1.26	0.99	1.05	0.49	0.3	Four and a half LIM domains protein 1 (Fragment) OS=Homo sapiens OX=9606 GN=FHL1 PE=1 SV=1
Q5JXI3|Q5JXI3_HUMAN	4250000	5360000	4220000	4460000	2090000	1260000	1	1.26	0.99	1.05	0.49	0.3	Four and a half LIM domains protein 1 (Fragment) OS=Homo sapiens OX=9606 GN=FHL1 PE=1 SV=1
Q5JXI2|Q5JXI2_HUMAN	4250000	5360000	4220000	4460000	2090000	1260000	1	1.26	0.99	1.05	0.49	0.3	Four and a half LIM domains protein 1 OS=Homo sapiens OX=9606 GN=FHL1 PE=1 SV=1
A0A494C0D6|A0A494C0D6_HUMAN	4250000	5360000	4220000	4460000	2090000	1260000	1	1.26	0.99	1.05	0.49	0.3	Four and a half LIM domains protein 1 OS=Homo sapiens OX=9606 GN=FHL1 PE=1 SV=1
Q5JXI8|Q5JXI8_HUMAN	4250000	5360000	4220000	4460000	2090000	1260000	1	1.26	0.99	1.05	0.49	0.3	Four and a half LIM domains protein 1 (Fragment) OS=Homo sapiens OX=9606 GN=FHL1 PE=1 SV=1
sp|Q13642|FHL1_HUMAN	4250000	5360000	4220000	4460000	2090000	1260000	1	1.26	0.99	1.05	0.49	0.3	Four and a half LIM domains protein 1 OS=Homo sapiens OX=9606 GN=FHL1 PE=1 SV=4
sp|P37802|TAGL2_HUMAN	1850000	1920000	1230000	883000	1130000	1490000	1	1.04	0.67	0.48	0.61	0.81	Transgelin-2 OS=Homo sapiens OX=9606 GN=TAGLN2 PE=1 SV=3
X6RJP6|X6RJP6_HUMAN	1850000	1920000	1230000	883000	1130000	1490000	1	1.04	0.67	0.48	0.61	0.81	Transgelin-2 (Fragment) OS=Homo sapiens OX=9606 GN=TAGLN2 PE=1 SV=1
A0A2R8Y6G6|A0A2R8Y6G6_HUMAN	264000	420000	222000	208000	293000	214000	1	1.59	0.84	0.79	1.11	0.81	2-phospho-D-glycerate hydro-lyase OS=Homo sapiens OX=9606 GN=ENO1 PE=1 SV=1
sp|P16402|H13_HUMAN	7720000	4480000	9120000	4930000	2190000	1990000	1	0.58	1.18	0.64	0.28	0.26	Histone H1.3 OS=Homo sapiens OX=9606 GN=H1-3 PE=1 SV=2
sp|Q06323|PSME1_HUMAN	847000	1020000	779000	998000	1400000	1050000	1	1.21	0.92	1.18	1.65	1.24	Proteasome activator complex subunit 1 OS=Homo sapiens OX=9606 GN=PSME1 PE=1 SV=1
A0A087X0M8|A0A087X0M8_HUMAN	1140000	1490000	1320000	1200000	1220000	950000	1	1.31	1.15	1.05	1.07	0.83	Neural cell adhesion molecule L1-like protein OS=Homo sapiens OX=9606 GN=CHL1 PE=1 SV=1
sp|O00533|NCHL1_HUMAN	1140000	1490000	1320000	1200000	1220000	950000	1	1.31	1.15	1.05	1.07	0.83	Neural cell adhesion molecule L1-like protein OS=Homo sapiens OX=9606 GN=CHL1 PE=1 SV=4
sp|Q14964|RB39A_HUMAN	1610000	1410000	1640000	1700000	1480000	1470000	1	0.88	1.02	1.06	0.92	0.91	Ras-related protein Rab-39A OS=Homo sapiens OX=9606 GN=RAB39A PE=1 SV=2
sp|P05451|REG1A_HUMAN	364000	753000	342000	422000	515000	323000	1	2.07	0.94	1.16	1.42	0.89	Lithostathine-1-alpha OS=Homo sapiens OX=9606 GN=REG1A PE=1 SV=3
sp|P48304|REG1B_HUMAN	364000	753000	342000	422000	515000	323000	1	2.07	0.94	1.16	1.42	0.89	Lithostathine-1-beta OS=Homo sapiens OX=9606 GN=REG1B PE=1 SV=1
sp|P12830|CADH1_HUMAN	546000	588000	689000	770000	587000	633000	1	1.08	1.26	1.41	1.08	1.16	Cadherin-1 OS=Homo sapiens OX=9606 GN=CDH1 PE=1 SV=3
H3BVI7|H3BVI7_HUMAN	546000	588000	689000	770000	587000	633000	1	1.08	1.26	1.41	1.08	1.16	Cadherin-1 OS=Homo sapiens OX=9606 GN=CDH1 PE=1 SV=1
H3BNC6|H3BNC6_HUMAN	546000	588000	689000	770000	587000	633000	1	1.08	1.26	1.41	1.08	1.16	Cadherin-1 OS=Homo sapiens OX=9606 GN=CDH1 PE=1 SV=1
M0R1V7|M0R1V7_HUMAN	1780000	4600000	1580000	1790000	3580000	2320000	1	2.58	0.89	1.01	2.01	1.3	Ubiquitin-60S ribosomal protein L40 (Fragment) OS=Homo sapiens OX=9606 GN=UBA52 PE=1 SV=1
J3QS39|J3QS39_HUMAN	1780000	4600000	1580000	1790000	3580000	2320000	1	2.58	0.89	1.01	2.01	1.3	Polyubiquitin-B (Fragment) OS=Homo sapiens OX=9606 GN=UBB PE=1 SV=1
J3QTR3|J3QTR3_HUMAN	1780000	4600000	1580000	1790000	3580000	2320000	1	2.58	0.89	1.01	2.01	1.3	Ubiquitin-40S ribosomal protein S27a (Fragment) OS=Homo sapiens OX=9606 GN=RPS27A PE=1 SV=1
M0R1M6|M0R1M6_HUMAN	1780000	4600000	1580000	1790000	3580000	2320000	1	2.58	0.89	1.01	2.01	1.3	60S ribosomal protein L40 (Fragment) OS=Homo sapiens OX=9606 GN=UBA52 PE=1 SV=1
F5H6Q2|F5H6Q2_HUMAN	1780000	4600000	1580000	1790000	3580000	2320000	1	2.58	0.89	1.01	2.01	1.3	Polyubiquitin-C (Fragment) OS=Homo sapiens OX=9606 GN=UBC PE=1 SV=8
sp|P62987|RL40_HUMAN	1780000	4600000	1580000	1790000	3580000	2320000	1	2.58	0.89	1.01	2.01	1.3	Ubiquitin-60S ribosomal protein L40 OS=Homo sapiens OX=9606 GN=UBA52 PE=1 SV=2
F5GYU3|F5GYU3_HUMAN	1780000	4600000	1580000	1790000	3580000	2320000	1	2.58	0.89	1.01	2.01	1.3	Polyubiquitin-C (Fragment) OS=Homo sapiens OX=9606 GN=UBC PE=1 SV=1
F5H2Z3|F5H2Z3_HUMAN	1780000	4600000	1580000	1790000	3580000	2320000	1	2.58	0.89	1.01	2.01	1.3	Polyubiquitin-C (Fragment) OS=Homo sapiens OX=9606 GN=UBC PE=1 SV=1
M0R2S1|M0R2S1_HUMAN	1780000	4600000	1580000	1790000	3580000	2320000	1	2.58	0.89	1.01	2.01	1.3	60S ribosomal protein L40 (Fragment) OS=Homo sapiens OX=9606 GN=UBA52 PE=1 SV=1
F5H265|F5H265_HUMAN	1780000	4600000	1580000	1790000	3580000	2320000	1	2.58	0.89	1.01	2.01	1.3	Polyubiquitin-C (Fragment) OS=Homo sapiens OX=9606 GN=UBC PE=1 SV=1
B4DV12|B4DV12_HUMAN	1780000	4600000	1580000	1790000	3580000	2320000	1	2.58	0.89	1.01	2.01	1.3	Polyubiquitin-B OS=Homo sapiens OX=9606 GN=UBB PE=1 SV=1
F5H388|F5H388_HUMAN	1780000	4600000	1580000	1790000	3580000	2320000	1	2.58	0.89	1.01	2.01	1.3	Polyubiquitin-C (Fragment) OS=Homo sapiens OX=9606 GN=UBC PE=1 SV=1
A0A2R8Y422|A0A2R8Y422_HUMAN	1780000	4600000	1580000	1790000	3580000	2320000	1	2.58	0.89	1.01	2.01	1.3	40S ribosomal protein S27a OS=Homo sapiens OX=9606 GN=RPS27AP5 PE=3 SV=1
sp|P62979|RS27A_HUMAN	1780000	4600000	1580000	1790000	3580000	2320000	1	2.58	0.89	1.01	2.01	1.3	Ubiquitin-40S ribosomal protein S27a OS=Homo sapiens OX=9606 GN=RPS27A PE=1 SV=2
F5H747|F5H747_HUMAN	1780000	4600000	1580000	1790000	3580000	2320000	1	2.58	0.89	1.01	2.01	1.3	Polyubiquitin-C (Fragment) OS=Homo sapiens OX=9606 GN=UBC PE=1 SV=8
F5GXK7|F5GXK7_HUMAN	1780000	4600000	1580000	1790000	3580000	2320000	1	2.58	0.89	1.01	2.01	1.3	Polyubiquitin-C (Fragment) OS=Homo sapiens OX=9606 GN=UBC PE=1 SV=2
J3QKN0|J3QKN0_HUMAN	1780000	4600000	1580000	1790000	3580000	2320000	1	2.58	0.89	1.01	2.01	1.3	Polyubiquitin-B (Fragment) OS=Homo sapiens OX=9606 GN=UBB PE=1 SV=1
Q5PY61|Q5PY61_HUMAN	1780000	4600000	1580000	1790000	3580000	2320000	1	2.58	0.89	1.01	2.01	1.3	Polyubiquitin-C OS=Homo sapiens OX=9606 GN=UBC PE=1 SV=1
Q96C32|Q96C32_HUMAN	1780000	4600000	1580000	1790000	3580000	2320000	1	2.58	0.89	1.01	2.01	1.3	Polyubiquitin-C OS=Homo sapiens OX=9606 GN=UBC PE=1 SV=1
sp|P0CG48|UBC_HUMAN	1780000	4600000	1580000	1790000	3580000	2320000	1	2.58	0.89	1.01	2.01	1.3	Polyubiquitin-C OS=Homo sapiens OX=9606 GN=UBC PE=1 SV=3
sp|P60174|TPIS_HUMAN	1180000	2850000	1200000	974000	1470000	1060000	1	2.42	1.02	0.83	1.25	0.9	Triosephosphate isomerase OS=Homo sapiens OX=9606 GN=TPI1 PE=1 SV=4
sp|A0A075B6I1|LV460_HUMAN	4570000	11100000	2310000	1990000	2860000	2110000	1	2.42	0.51	0.44	0.63	0.46	Immunoglobulin lambda variable 4-60 OS=Homo sapiens OX=9606 GN=IGLV4-60 PE=3 SV=1
sp|P07476|INVO_HUMAN	825000	532000	885000	1100000	202000	281000	1	0.64	1.07	1.33	0.24	0.34	Involucrin OS=Homo sapiens OX=9606 GN=IVL PE=1 SV=2
A0A590UJJ6|A0A590UJJ6_HUMAN	1360000	1950000	2890000	1570000	2000000	2970000	1	1.43	2.13	1.16	1.48	2.19	Histone H3 OS=Homo sapiens OX=9606 GN=H3-3A PE=1 SV=1
B4DEB1|B4DEB1_HUMAN	1360000	1950000	2890000	1570000	2000000	2970000	1	1.43	2.13	1.16	1.48	2.19	Histone H3 OS=Homo sapiens OX=9606 GN=H3-3A PE=1 SV=1
K7EMV3|K7EMV3_HUMAN	1360000	1950000	2890000	1570000	2000000	2970000	1	1.43	2.13	1.16	1.48	2.19	Histone H3 OS=Homo sapiens OX=9606 GN=H3-3B PE=1 SV=1
K7EK07|K7EK07_HUMAN	1360000	1950000	2890000	1570000	2000000	2970000	1	1.43	2.13	1.16	1.48	2.19	Histone H3 (Fragment) OS=Homo sapiens OX=9606 GN=H3-3B PE=1 SV=1
sp|P84243|H33_HUMAN	1360000	1950000	2890000	1570000	2000000	2970000	1	1.43	2.13	1.16	1.48	2.19	Histone H3.3 OS=Homo sapiens OX=9606 GN=H3-3B PE=1 SV=2
sp|Q71DI3|H32_HUMAN	1360000	1950000	2890000	1570000	2000000	2970000	1	1.43	2.13	1.16	1.48	2.19	Histone H3.2 OS=Homo sapiens OX=9606 GN=H3C13 PE=1 SV=3
sp|P68431|H31_HUMAN	1360000	1950000	2890000	1570000	2000000	2970000	1	1.43	2.13	1.16	1.48	2.19	Histone H3.1 OS=Homo sapiens OX=9606 GN=H3C12 PE=1 SV=2
sp|Q16695|H31T_HUMAN	1360000	1950000	2890000	1570000	2000000	2970000	1	1.43	2.13	1.16	1.48	2.19	Histone H3.1t OS=Homo sapiens OX=9606 GN=H3-4 PE=1 SV=3
K7ES00|K7ES00_HUMAN	1360000	1950000	2890000	1570000	2000000	2970000	1	1.43	2.13	1.16	1.48	2.19	Histone H3.3 (Fragment) OS=Homo sapiens OX=9606 GN=H3-3B PE=1 SV=1
H0YM70|H0YM70_HUMAN	717000	589000	535000	700000	292000	153000	1	0.82	0.75	0.98	0.41	0.21	Proteasome activator complex subunit 2 OS=Homo sapiens OX=9606 GN=PSME2 PE=1 SV=1
sp|Q9UL46|PSME2_HUMAN	717000	589000	535000	700000	292000	153000	1	0.82	0.75	0.98	0.41	0.21	Proteasome activator complex subunit 2 OS=Homo sapiens OX=9606 GN=PSME2 PE=1 SV=4
A0A087X1Z3|A0A087X1Z3_HUMAN	717000	589000	535000	700000	292000	153000	1	0.82	0.75	0.98	0.41	0.21	Proteasome activator complex subunit 2 OS=Homo sapiens OX=9606 GN=PSME2 PE=1 SV=1
sp|P50990|TCPQ_HUMAN	3770000	3280000	3410000	3230000	1360000	1880000	1	0.87	0.9	0.86	0.36	0.5	T-complex protein 1 subunit theta OS=Homo sapiens OX=9606 GN=CCT8 PE=1 SV=4
H7C4C8|H7C4C8_HUMAN	3770000	3280000	3410000	3230000	1360000	1880000	1	0.87	0.9	0.86	0.36	0.5	T-complex protein 1 subunit theta (Fragment) OS=Homo sapiens OX=9606 GN=CCT8 PE=1 SV=1
sp|P78509|RELN_HUMAN	234000	299000	260000	262000	316000	331000	1	1.28	1.11	1.12	1.35	1.42	Reelin OS=Homo sapiens OX=9606 GN=RELN PE=1 SV=3
A0A7P0TA83|A0A7P0TA83_HUMAN	234000	299000	260000	262000	316000	331000	1	1.28	1.11	1.12	1.35	1.42	Reelin OS=Homo sapiens OX=9606 GN=RELN PE=4 SV=1
J3KQ66|J3KQ66_HUMAN	234000	299000	260000	262000	316000	331000	1	1.28	1.11	1.12	1.35	1.42	Reelin OS=Homo sapiens OX=9606 GN=RELN PE=1 SV=2
F5H0N7|F5H0N7_HUMAN	267000	278000	263000	263000	127000	116000	1	1.04	0.99	0.98	0.48	0.43	CAP-Gly domain-containing linker protein 1 (Fragment) OS=Homo sapiens OX=9606 GN=CLIP1 PE=1 SV=2
sp|P30622|CLIP1_HUMAN	267000	278000	263000	263000	127000	116000	1	1.04	0.99	0.98	0.48	0.43	CAP-Gly domain-containing linker protein 1 OS=Homo sapiens OX=9606 GN=CLIP1 PE=1 SV=2
J3KP58|J3KP58_HUMAN	267000	278000	263000	263000	127000	116000	1	1.04	0.99	0.98	0.48	0.43	CAP-Gly domain-containing linker protein 1 OS=Homo sapiens OX=9606 GN=CLIP1 PE=1 SV=2
sp|Q9UQ35|SRRM2_HUMAN	334000	290000	395000	399000	211000	120000	1	0.87	1.18	1.2	0.63	0.36	Serine/arginine repetitive matrix protein 2 OS=Homo sapiens OX=9606 GN=SRRM2 PE=1 SV=2
I3L4D8|I3L4D8_HUMAN	334000	290000	395000	399000	211000	120000	1	0.87	1.18	1.2	0.63	0.36	Serine/arginine repetitive matrix protein 2 (Fragment) OS=Homo sapiens OX=9606 GN=SRRM2 PE=1 SV=1
I3L0N7|I3L0N7_HUMAN	334000	290000	395000	399000	211000	120000	1	0.87	1.18	1.2	0.63	0.36	Serine/arginine repetitive matrix protein 2 (Fragment) OS=Homo sapiens OX=9606 GN=SRRM2 PE=1 SV=1
sp|Q9P258|RCC2_HUMAN	259000	363000	327000	322000	147000	114000	1	1.41	1.26	1.24	0.57	0.44	Protein RCC2 OS=Homo sapiens OX=9606 GN=RCC2 PE=1 SV=2
D6RBQ9|D6RBQ9_HUMAN	8090000	6590000	8150000	6340000	714000	1230000	1	0.82	1.01	0.78	0.09	0.15	Heterogeneous nuclear ribonucleoprotein D0 (Fragment) OS=Homo sapiens OX=9606 GN=HNRNPD PE=1 SV=1
E7EQT4|E7EQT4_HUMAN	1180000	680000	1200000	586000	291000	254000	1	0.58	1.01	0.5	0.25	0.22	Apoptotic chromatin condensation inducer in the nucleus OS=Homo sapiens OX=9606 GN=ACIN1 PE=1 SV=2
sp|Q9UKV3|ACINU_HUMAN	1180000	680000	1200000	586000	291000	254000	1	0.58	1.01	0.5	0.25	0.22	Apoptotic chromatin condensation inducer in the nucleus OS=Homo sapiens OX=9606 GN=ACIN1 PE=1 SV=2
S4R3H4|S4R3H4_HUMAN	1180000	680000	1200000	586000	291000	254000	1	0.58	1.01	0.5	0.25	0.22	Apoptotic chromatin condensation inducer in the nucleus OS=Homo sapiens OX=9606 GN=ACIN1 PE=1 SV=1
G3V3B0|G3V3B0_HUMAN	1180000	680000	1200000	586000	291000	254000	1	0.58	1.01	0.5	0.25	0.22	Apoptotic chromatin condensation inducer in the nucleus OS=Homo sapiens OX=9606 GN=ACIN1 PE=1 SV=1
sp|O75339|CILP1_HUMAN	1350000	1570000	1750000	1320000	1180000	1300000	1	1.17	1.29	0.98	0.87	0.96	Cartilage intermediate layer protein 1 OS=Homo sapiens OX=9606 GN=CILP PE=1 SV=4
sp|Q92945|FUBP2_HUMAN	754000	839000	914000	743000	588000	291000	1	1.11	1.21	0.99	0.78	0.39	Far upstream element-binding protein 2 OS=Homo sapiens OX=9606 GN=KHSRP PE=1 SV=4
A0A087WTP3|A0A087WTP3_HUMAN	754000	839000	914000	743000	588000	291000	1	1.11	1.21	0.99	0.78	0.39	Far upstream element-binding protein 2 OS=Homo sapiens OX=9606 GN=KHSRP PE=1 SV=1
M0R0C6|M0R0C6_HUMAN	754000	839000	914000	743000	588000	291000	1	1.11	1.21	0.99	0.78	0.39	Far upstream element-binding protein 2 OS=Homo sapiens OX=9606 GN=KHSRP PE=1 SV=2
M0R3J3|M0R3J3_HUMAN	754000	839000	914000	743000	588000	291000	1	1.11	1.21	0.99	0.78	0.39	Far upstream element-binding protein 2 (Fragment) OS=Homo sapiens OX=9606 GN=KHSRP PE=1 SV=1
sp|Q15828|CYTM_HUMAN	532000	600000	536000	508000	581000	500000	1	1.13	1.01	0.96	1.09	0.94	Cystatin-M OS=Homo sapiens OX=9606 GN=CST6 PE=1 SV=1
sp|P62873|GBB1_HUMAN	174000	430000	215000	244000	339000	207000	1	2.47	1.23	1.4	1.95	1.19	Guanine nucleotide-binding protein G(I)/G(S)/G(T) subunit beta-1 OS=Homo sapiens OX=9606 GN=GNB1 PE=1 SV=3
B3KVK2|B3KVK2_HUMAN	174000	430000	215000	244000	339000	207000	1	2.47	1.23	1.4	1.95	1.19	Guanine nucleotide-binding protein G(I)/G(S)/G(T) subunit beta-1 OS=Homo sapiens OX=9606 GN=GNB1 PE=1 SV=1
E7EP32|E7EP32_HUMAN	174000	430000	215000	244000	339000	207000	1	2.47	1.23	1.4	1.95	1.19	Guanine nucleotide-binding protein G(I)/G(S)/G(T) subunit beta-2 OS=Homo sapiens OX=9606 GN=GNB2 PE=1 SV=1
A0A6Q8PG88|A0A6Q8PG88_HUMAN	174000	430000	215000	244000	339000	207000	1	2.47	1.23	1.4	1.95	1.19	Guanine nucleotide-binding protein subunit beta-4 OS=Homo sapiens OX=9606 GN=GNB4 PE=1 SV=1
A0A7I2S2S9|A0A7I2S2S9_HUMAN	174000	430000	215000	244000	339000	207000	1	2.47	1.23	1.4	1.95	1.19	Guanine nucleotide-binding protein subunit beta-4 OS=Homo sapiens OX=9606 GN=GNB4 PE=1 SV=1
sp|Q9HAV0|GBB4_HUMAN	174000	430000	215000	244000	339000	207000	1	2.47	1.23	1.4	1.95	1.19	Guanine nucleotide-binding protein subunit beta-4 OS=Homo sapiens OX=9606 GN=GNB4 PE=1 SV=3
sp|P62879|GBB2_HUMAN	174000	430000	215000	244000	339000	207000	1	2.47	1.23	1.4	1.95	1.19	Guanine nucleotide-binding protein G(I)/G(S)/G(T) subunit beta-2 OS=Homo sapiens OX=9606 GN=GNB2 PE=1 SV=3
sp|Q15075|EEA1_HUMAN	3090000	2180000	3040000	2810000	455000	588000	1	0.71	0.98	0.91	0.15	0.19	Early endosome antigen 1 OS=Homo sapiens OX=9606 GN=EEA1 PE=1 SV=2
sp|Q9UHC6|CNTP2_HUMAN	1350000	2330000	1520000	2040000	1430000	1070000	1	1.72	1.12	1.5	1.06	0.79	Contactin-associated protein-like 2 OS=Homo sapiens OX=9606 GN=CNTNAP2 PE=1 SV=1
B7Z1Y6|B7Z1Y6_HUMAN	1350000	2330000	1520000	2040000	1430000	1070000	1	1.72	1.12	1.5	1.06	0.79	Contactin-associated protein-like 2 OS=Homo sapiens OX=9606 GN=CNTNAP2 PE=1 SV=1
sp|P04921|GLPC_HUMAN	1350000	2330000	1520000	2040000	1430000	1070000	1	1.72	1.12	1.5	1.06	0.79	Glycophorin-C OS=Homo sapiens OX=9606 GN=GYPC PE=1 SV=1
A0A0J9YYA0|A0A0J9YYA0_HUMAN	1350000	2330000	1520000	2040000	1430000	1070000	1	1.72	1.12	1.5	1.06	0.79	Contactin-associated protein-like 2 (Fragment) OS=Homo sapiens OX=9606 GN=CNTNAP2 PE=1 SV=1
A0A0J9YWG3|A0A0J9YWG3_HUMAN	1350000	2330000	1520000	2040000	1430000	1070000	1	1.72	1.12	1.5	1.06	0.79	Contactin-associated protein-like 2 (Fragment) OS=Homo sapiens OX=9606 GN=CNTNAP2 PE=1 SV=1
A0A1W2PP35|A0A1W2PP35_HUMAN	896000	853000	1120000	969000	72700	53600	1	0.95	1.25	1.08	0.08	0.06	Heterogeneous nuclear ribonucleoprotein U (Fragment) OS=Homo sapiens OX=9606 GN=HNRNPU PE=1 SV=1
Q9UFM8|Q9UFM8_HUMAN	4330000	4260000	4240000	3890000	167000	446000	1	0.99	0.98	0.9	0.04	0.1	Neuroplastin (Fragment) OS=Homo sapiens OX=9606 GN=NPTN PE=1 SV=2
sp|Q9Y639|NPTN_HUMAN	4330000	4260000	4240000	3890000	167000	446000	1	0.99	0.98	0.9	0.04	0.1	Neuroplastin OS=Homo sapiens OX=9606 GN=NPTN PE=1 SV=2
H3BU51|H3BU51_HUMAN	4330000	4260000	4240000	3890000	167000	446000	1	0.99	0.98	0.9	0.04	0.1	Neuroplastin OS=Homo sapiens OX=9606 GN=NPTN PE=1 SV=1
sp|P08133|ANXA6_HUMAN	2500000	1770000	1640000	2180000	564000	522000	1	0.71	0.66	0.87	0.23	0.21	Annexin A6 OS=Homo sapiens OX=9606 GN=ANXA6 PE=1 SV=3
E5RK69|E5RK69_HUMAN	2500000	1770000	1640000	2180000	564000	522000	1	0.71	0.66	0.87	0.23	0.21	Annexin OS=Homo sapiens OX=9606 GN=ANXA6 PE=1 SV=1
sp|A0A075B6I9|LV746_HUMAN	74600000	72600000	62000000	59100000	57300000	79400000	1	0.97	0.83	0.79	0.77	1.06	Immunoglobulin lambda variable 7-46 OS=Homo sapiens OX=9606 GN=IGLV7-46 PE=3 SV=4
sp|P04211|LV743_HUMAN	74600000	72600000	62000000	59100000	57300000	79400000	1	0.97	0.83	0.79	0.77	1.06	Immunoglobulin lambda variable 7-43 OS=Homo sapiens OX=9606 GN=IGLV7-43 PE=3 SV=2
sp|P52746|ZN142_HUMAN	97100000	75500000	97100000	87200000	64800000	96500000	1	0.78	1	0.9	0.67	0.99	Zinc finger protein 142 OS=Homo sapiens OX=9606 GN=ZNF142 PE=1 SV=4
A0A7P0N7C4|A0A7P0N7C4_HUMAN	97100000	75500000	97100000	87200000	64800000	96500000	1	0.78	1	0.9	0.67	0.99	Zinc finger protein 142 OS=Homo sapiens OX=9606 GN=ZNF142 PE=4 SV=1
sp|Q9Y5C1|ANGL3_HUMAN	645000	892000	432000	547000	466000	510000	1	1.38	0.67	0.85	0.72	0.79	Angiopoietin-related protein 3 OS=Homo sapiens OX=9606 GN=ANGPTL3 PE=1 SV=1
sp|P61601|NCALD_HUMAN	1560000	1040000	1580000	986000	222000	245000	1	0.67	1.01	0.63	0.14	0.16	Neurocalcin-delta OS=Homo sapiens OX=9606 GN=NCALD PE=1 SV=2
sp|P84074|HPCA_HUMAN	1560000	1040000	1580000	986000	222000	245000	1	0.67	1.01	0.63	0.14	0.16	Neuron-specific calcium-binding protein hippocalcin OS=Homo sapiens OX=9606 GN=HPCA PE=1 SV=2
sp|P37235|HPCL1_HUMAN	1560000	1040000	1580000	986000	222000	245000	1	0.67	1.01	0.63	0.14	0.16	Hippocalcin-like protein 1 OS=Homo sapiens OX=9606 GN=HPCAL1 PE=1 SV=3
E5RGA9|E5RGA9_HUMAN	1560000	1040000	1580000	986000	222000	245000	1	0.67	1.01	0.63	0.14	0.16	Neurocalcin-delta OS=Homo sapiens OX=9606 GN=NCALD PE=1 SV=1
H7BZC1|H7BZC1_HUMAN	1560000	1040000	1580000	986000	222000	245000	1	0.67	1.01	0.63	0.14	0.16	Hippocalcin-like protein 1 (Fragment) OS=Homo sapiens OX=9606 GN=HPCAL1 PE=1 SV=1
E9PC71|E9PC71_HUMAN	1560000	1040000	1580000	986000	222000	245000	1	0.67	1.01	0.63	0.14	0.16	Hippocalcin-like protein 1 OS=Homo sapiens OX=9606 GN=HPCAL1 PE=1 SV=1
sp|Q14118|DAG1_HUMAN	5640000	5610000	6550000	4660000	1140000	1120000	1	0.99	1.16	0.83	0.2	0.2	Dystroglycan OS=Homo sapiens OX=9606 GN=DAG1 PE=1 SV=2
sp|P07919|QCR6_HUMAN	3100000	1730000	3370000	2250000	166000	175000	1	0.56	1.09	0.73	0.05	0.06	Cytochrome b-c1 complex subunit 6 mitochondrial OS=Homo sapiens OX=9606 GN=UQCRH PE=1 SV=2
sp|A0A096LP55|QCR6L_HUMAN	3100000	1730000	3370000	2250000	166000	175000	1	0.56	1.09	0.73	0.05	0.06	Cytochrome b-c1 complex subunit 6-like mitochondrial OS=Homo sapiens OX=9606 GN=UQCRHL PE=3 SV=1
sp|P01705|LV223_HUMAN	3120000	10300000	7780000	9510000	5500000	10300000	1	3.31	2.49	3.04	1.76	3.29	Immunoglobulin lambda variable 2-23 OS=Homo sapiens OX=9606 GN=IGLV2-23 PE=1 SV=2
sp|P22692|IBP4_HUMAN	282000	461000	248000	290000	272000	291000	1	1.64	0.88	1.03	0.96	1.03	Insulin-like growth factor-binding protein 4 OS=Homo sapiens OX=9606 GN=IGFBP4 PE=1 SV=2
J3QRT5|J3QRT5_HUMAN	616000	756000	659000	528000	642000	546000	1	1.23	1.07	0.86	1.04	0.89	Intercellular adhesion molecule 2 OS=Homo sapiens OX=9606 GN=ICAM2 PE=1 SV=1
J3QQR8|J3QQR8_HUMAN	616000	756000	659000	528000	642000	546000	1	1.23	1.07	0.86	1.04	0.89	Intercellular adhesion molecule 2 (Fragment) OS=Homo sapiens OX=9606 GN=ICAM2 PE=1 SV=8
J3QKR4|J3QKR4_HUMAN	616000	756000	659000	528000	642000	546000	1	1.23	1.07	0.86	1.04	0.89	Intercellular adhesion molecule 2 OS=Homo sapiens OX=9606 GN=ICAM2 PE=1 SV=1
J3QQX6|J3QQX6_HUMAN	616000	756000	659000	528000	642000	546000	1	1.23	1.07	0.86	1.04	0.89	Intercellular adhesion molecule 2 (Fragment) OS=Homo sapiens OX=9606 GN=ICAM2 PE=1 SV=1
J3QRQ1|J3QRQ1_HUMAN	616000	756000	659000	528000	642000	546000	1	1.23	1.07	0.86	1.04	0.89	Intercellular adhesion molecule 2 (Fragment) OS=Homo sapiens OX=9606 GN=ICAM2 PE=1 SV=1
sp|P13598|ICAM2_HUMAN	616000	756000	659000	528000	642000	546000	1	1.23	1.07	0.86	1.04	0.89	Intercellular adhesion molecule 2 OS=Homo sapiens OX=9606 GN=ICAM2 PE=1 SV=2
sp|P07900|HS90A_HUMAN	14100000	12800000	15300000	15700000	2910000	2580000	1	0.91	1.09	1.12	0.21	0.18	Heat shock protein HSP 90-alpha OS=Homo sapiens OX=9606 GN=HSP90AA1 PE=1 SV=5
sp|P28066|PSA5_HUMAN	779000	1040000	682000	892000	735000	691000	1	1.33	0.88	1.14	0.94	0.89	Proteasome subunit alpha type-5 OS=Homo sapiens OX=9606 GN=PSMA5 PE=1 SV=3
E7EQB2|E7EQB2_HUMAN	805000	804000	718000	793000	1000000	767000	1	1	0.89	0.99	1.25	0.95	Lactotransferrin (Fragment) OS=Homo sapiens OX=9606 GN=LTF PE=1 SV=1
E7ER44|E7ER44_HUMAN	805000	804000	718000	793000	1000000	767000	1	1	0.89	0.99	1.25	0.95	Lactotransferrin OS=Homo sapiens OX=9606 GN=LTF PE=1 SV=1
sp|P02788|TRFL_HUMAN	805000	804000	718000	793000	1000000	767000	1	1	0.89	0.99	1.25	0.95	Lactotransferrin OS=Homo sapiens OX=9606 GN=LTF PE=1 SV=6
sp|P11279|LAMP1_HUMAN	1450000	1000000	1130000	1350000	1330000	959000	1	0.69	0.78	0.94	0.92	0.66	Lysosome-associated membrane glycoprotein 1 OS=Homo sapiens OX=9606 GN=LAMP1 PE=1 SV=3
F8WF48|F8WF48_HUMAN	2070000	1780000	2460000	1740000	413000	407000	1	0.86	1.19	0.84	0.2	0.2	Translocation protein SEC62 OS=Homo sapiens OX=9606 GN=SEC62 PE=1 SV=1
F8WCJ7|F8WCJ7_HUMAN	2070000	1780000	2460000	1740000	413000	407000	1	0.86	1.19	0.84	0.2	0.2	Translocation protein SEC62 OS=Homo sapiens OX=9606 GN=SEC62 PE=1 SV=1
sp|Q99442|SEC62_HUMAN	2070000	1780000	2460000	1740000	413000	407000	1	0.86	1.19	0.84	0.2	0.2	Translocation protein SEC62 OS=Homo sapiens OX=9606 GN=SEC62 PE=1 SV=1
sp|P61081|UBC12_HUMAN	3410000	2450000	3450000	2880000	450000	441000	1	0.72	1.01	0.84	0.13	0.13	NEDD8-conjugating enzyme Ubc12 OS=Homo sapiens OX=9606 GN=UBE2M PE=1 SV=1
H0YKF0|H0YKF0_HUMAN	792000	975000	824000	1480000	187000	283000	1	1.23	1.04	1.86	0.24	0.36	Electron transfer flavoprotein subunit alpha mitochondrial (Fragment) OS=Homo sapiens OX=9606 GN=ETFA PE=1 SV=1
H0YK49|H0YK49_HUMAN	792000	975000	824000	1480000	187000	283000	1	1.23	1.04	1.86	0.24	0.36	Electron transfer flavoprotein subunit alpha OS=Homo sapiens OX=9606 GN=ETFA PE=1 SV=1
H0YL12|H0YL12_HUMAN	792000	975000	824000	1480000	187000	283000	1	1.23	1.04	1.86	0.24	0.36	Electron transfer flavoprotein subunit alpha mitochondrial (Fragment) OS=Homo sapiens OX=9606 GN=ETFA PE=1 SV=8
H0YNX6|H0YNX6_HUMAN	792000	975000	824000	1480000	187000	283000	1	1.23	1.04	1.86	0.24	0.36	Electron transfer flavoprotein subunit alpha mitochondrial (Fragment) OS=Homo sapiens OX=9606 GN=ETFA PE=1 SV=1
H0YLU7|H0YLU7_HUMAN	792000	975000	824000	1480000	187000	283000	1	1.23	1.04	1.86	0.24	0.36	Electron transfer flavoprotein subunit alpha mitochondrial (Fragment) OS=Homo sapiens OX=9606 GN=ETFA PE=1 SV=1
sp|P13804|ETFA_HUMAN	792000	975000	824000	1480000	187000	283000	1	1.23	1.04	1.86	0.24	0.36	Electron transfer flavoprotein subunit alpha mitochondrial OS=Homo sapiens OX=9606 GN=ETFA PE=1 SV=1
sp|Q96AE4|FUBP1_HUMAN	2170000	1670000	2320000	2140000	741000	756000	1	0.77	1.07	0.99	0.34	0.35	Far upstream element-binding protein 1 OS=Homo sapiens OX=9606 GN=FUBP1 PE=1 SV=3
E9PEB5|E9PEB5_HUMAN	2170000	1670000	2320000	2140000	741000	756000	1	0.77	1.07	0.99	0.34	0.35	Far upstream element-binding protein 1 OS=Homo sapiens OX=9606 GN=FUBP1 PE=1 SV=1
sp|Q96S96|PEBP4_HUMAN	169000	209000	244000	218000	183000	249000	1	1.24	1.45	1.29	1.08	1.48	Phosphatidylethanolamine-binding protein 4 OS=Homo sapiens OX=9606 GN=PEBP4 PE=1 SV=3
sp|P05997|CO5A2_HUMAN	980000	604000	1090000	201000	258000	112000	1	0.62	1.11	0.2	0.26	0.11	Collagen alpha-2(V) chain OS=Homo sapiens OX=9606 GN=COL5A2 PE=1 SV=3
A0A087WYX9|A0A087WYX9_HUMAN	980000	604000	1090000	201000	258000	112000	1	0.62	1.11	0.2	0.26	0.11	Collagen alpha-2(V) chain OS=Homo sapiens OX=9606 GN=COL5A2 PE=1 SV=1
B4DNK4|B4DNK4_HUMAN	570000	707000	488000	405000	610000	544000	1	1.24	0.86	0.71	1.07	0.95	Pyruvate kinase OS=Homo sapiens OX=9606 GN=PKM PE=1 SV=1
H3BTN5|H3BTN5_HUMAN	570000	707000	488000	405000	610000	544000	1	1.24	0.86	0.71	1.07	0.95	Pyruvate kinase (Fragment) OS=Homo sapiens OX=9606 GN=PKM PE=1 SV=1
sp|P14618|KPYM_HUMAN	570000	707000	488000	405000	610000	544000	1	1.24	0.86	0.71	1.07	0.95	Pyruvate kinase PKM OS=Homo sapiens OX=9606 GN=PKM PE=1 SV=4
H3BR70|H3BR70_HUMAN	570000	707000	488000	405000	610000	544000	1	1.24	0.86	0.71	1.07	0.95	Pyruvate kinase OS=Homo sapiens OX=9606 GN=PKM PE=1 SV=1
Q5STZ8|Q5STZ8_HUMAN	296000	174000	201000	373000	17700	28100	1	0.59	0.68	1.26	0.06	0.09	ATP-binding cassette sub-family F member 1 OS=Homo sapiens OX=9606 GN=ABCF1 PE=1 SV=10
sp|Q5JXB2|UE2NL_HUMAN	959000	1110000	1020000	1160000	623000	369000	1	1.16	1.06	1.21	0.65	0.38	Putative ubiquitin-conjugating enzyme E2 N-like OS=Homo sapiens OX=9606 GN=UBE2NL PE=1 SV=1
F8VQQ8|F8VQQ8_HUMAN	959000	1110000	1020000	1160000	623000	369000	1	1.16	1.06	1.21	0.65	0.38	Ubiquitin-conjugating enzyme E2 N OS=Homo sapiens OX=9606 GN=UBE2N PE=1 SV=1
sp|P61088|UBE2N_HUMAN	959000	1110000	1020000	1160000	623000	369000	1	1.16	1.06	1.21	0.65	0.38	Ubiquitin-conjugating enzyme E2 N OS=Homo sapiens OX=9606 GN=UBE2N PE=1 SV=1
E9PF18|E9PF18_HUMAN	4670000	5320000	4290000	7920000	1980000	2250000	1	1.14	0.92	1.7	0.42	0.48	Hydroxyacyl-coenzyme A dehydrogenase mitochondrial OS=Homo sapiens OX=9606 GN=HADH PE=1 SV=2
A0A1W2PQ78|A0A1W2PQ78_HUMAN	4670000	5320000	4290000	7920000	1980000	2250000	1	1.14	0.92	1.7	0.42	0.48	Hydroxyacyl-coenzyme A dehydrogenase mitochondrial OS=Homo sapiens OX=9606 GN=HADH PE=1 SV=1
A0A1W2PNM1|A0A1W2PNM1_HUMAN	4670000	5320000	4290000	7920000	1980000	2250000	1	1.14	0.92	1.7	0.42	0.48	Hydroxyacyl-coenzyme A dehydrogenase mitochondrial (Fragment) OS=Homo sapiens OX=9606 GN=HADH PE=1 SV=1
sp|Q16836|HCDH_HUMAN	4670000	5320000	4290000	7920000	1980000	2250000	1	1.14	0.92	1.7	0.42	0.48	Hydroxyacyl-coenzyme A dehydrogenase mitochondrial OS=Homo sapiens OX=9606 GN=HADH PE=1 SV=3
A0A0D9SFP2|A0A0D9SFP2_HUMAN	4670000	5320000	4290000	7920000	1980000	2250000	1	1.14	0.92	1.7	0.42	0.48	Hydroxyacyl-coenzyme A dehydrogenase mitochondrial OS=Homo sapiens OX=9606 GN=HADH PE=1 SV=1
sp|P11166|GTR1_HUMAN	202000	258000	164000	363000	708000	506000	1	1.27	0.81	1.79	3.5	2.5	Solute carrier family 2 facilitated glucose transporter member 1 OS=Homo sapiens OX=9606 GN=SLC2A1 PE=1 SV=2
sp|Q9Y2S6|TMA7_HUMAN	970000	791000	696000	1040000	174000	507000	1	0.82	0.72	1.07	0.18	0.52	Translation machinery-associated protein 7 OS=Homo sapiens OX=9606 GN=TMA7 PE=1 SV=1
A0A669KBG0|A0A669KBG0_HUMAN	2680000	2450000	2010000	2110000	3610000	2070000	1	0.92	0.75	0.79	1.35	0.77	Proprotein convertase 9 OS=Homo sapiens OX=9606 GN=PCSK9 PE=1 SV=1
sp|Q8NBP7|PCSK9_HUMAN	2680000	2450000	2010000	2110000	3610000	2070000	1	0.92	0.75	0.79	1.35	0.77	Proprotein convertase subtilisin/kexin type 9 OS=Homo sapiens OX=9606 GN=PCSK9 PE=1 SV=3
sp|P24593|IBP5_HUMAN	627000	680000	703000	904000	795000	839000	1	1.08	1.12	1.44	1.27	1.34	Insulin-like growth factor-binding protein 5 OS=Homo sapiens OX=9606 GN=IGFBP5 PE=1 SV=1
sp|P02776|PLF4_HUMAN	749000	914000	632000	694000	654000	544000	1	1.22	0.84	0.93	0.87	0.73	Platelet factor 4 OS=Homo sapiens OX=9606 GN=PF4 PE=1 SV=2
sp|P10720|PF4V_HUMAN	749000	914000	632000	694000	654000	544000	1	1.22	0.84	0.93	0.87	0.73	Platelet factor 4 variant OS=Homo sapiens OX=9606 GN=PF4V1 PE=1 SV=1
F8VR77|F8VR77_HUMAN	618000	608000	924000	552000	263000	256000	1	0.98	1.5	0.89	0.43	0.42	Proliferation-associated protein 2G4 OS=Homo sapiens OX=9606 GN=PA2G4 PE=1 SV=1
sp|Q9UQ80|PA2G4_HUMAN	618000	608000	924000	552000	263000	256000	1	0.98	1.5	0.89	0.43	0.42	Proliferation-associated protein 2G4 OS=Homo sapiens OX=9606 GN=PA2G4 PE=1 SV=3
sp|Q9UM47|NOTC3_HUMAN	935000	767000	694000	885000	839000	957000	1	0.82	0.74	0.95	0.9	1.02	Neurogenic locus notch homolog protein 3 OS=Homo sapiens OX=9606 GN=NOTCH3 PE=1 SV=2
A0A7P0MRW0|A0A7P0MRW0_HUMAN	440000	363000	565000	383000	88100	151000	1	0.82	1.28	0.87	0.2	0.34	Non-POU domain-containing octamer-binding protein OS=Homo sapiens OX=9606 GN=NONO PE=4 SV=1
H7C367|H7C367_HUMAN	440000	363000	565000	383000	88100	151000	1	0.82	1.28	0.87	0.2	0.34	Non-POU domain-containing octamer-binding protein (Fragment) OS=Homo sapiens OX=9606 GN=NONO PE=1 SV=8
A0A7I2V464|A0A7I2V464_HUMAN	440000	363000	565000	383000	88100	151000	1	0.82	1.28	0.87	0.2	0.34	Non-POU domain-containing octamer-binding protein OS=Homo sapiens OX=9606 GN=NONO PE=1 SV=1
M0QXK0|M0QXK0_HUMAN	3130000	3450000	3030000	5710000	1060000	1300000	1	1.1	0.97	1.82	0.34	0.41	DnaJ homolog subfamily B member 1 OS=Homo sapiens OX=9606 GN=DNAJB1 PE=1 SV=2
sp|P25685|DNJB1_HUMAN	3130000	3450000	3030000	5710000	1060000	1300000	1	1.1	0.97	1.82	0.34	0.41	DnaJ homolog subfamily B member 1 OS=Homo sapiens OX=9606 GN=DNAJB1 PE=1 SV=4
sp|A8K2U0|A2ML1_HUMAN	1310000	1350000	1040000	1100000	696000	821000	1	1.03	0.79	0.84	0.53	0.63	Alpha-2-macroglobulin-like protein 1 OS=Homo sapiens OX=9606 GN=A2ML1 PE=1 SV=3
sp|Q14008|CKAP5_HUMAN	3850000	12800000	4310000	3630000	3220000	4800000	1	3.31	1.12	0.94	0.84	1.25	Cytoskeleton-associated protein 5 OS=Homo sapiens OX=9606 GN=CKAP5 PE=1 SV=3
sp|P05455|LA_HUMAN	1480000	1660000	1430000	1760000	446000	602000	1	1.12	0.96	1.19	0.3	0.41	Lupus La protein OS=Homo sapiens OX=9606 GN=SSB PE=1 SV=2
G8JL96|G8JL96_HUMAN	478000	365000	370000	299000	327000	399000	1	0.76	0.77	0.62	0.68	0.83	Protein-tyrosine-phosphatase OS=Homo sapiens OX=9606 GN=PTPRS PE=1 SV=2
sp|Q13332|PTPRS_HUMAN	478000	365000	370000	299000	327000	399000	1	0.76	0.77	0.62	0.68	0.83	Receptor-type tyrosine-protein phosphatase S OS=Homo sapiens OX=9606 GN=PTPRS PE=1 SV=3
sp|A0A0B4J1V2|HV226_HUMAN	21200000	29200000	25000000	23600000	15700000	18300000	1	1.38	1.18	1.11	0.74	0.86	Immunoglobulin heavy variable 2-26 OS=Homo sapiens OX=9606 GN=IGHV2-26 PE=3 SV=1
A0A0B4J2B6|A0A0B4J2B6_HUMAN	21200000	29200000	25000000	23600000	15700000	18300000	1	1.38	1.18	1.11	0.74	0.86	Immunoglobulin heavy variable 2/OR16-5 (non-functional) (Fragment) OS=Homo sapiens OX=9606 GN=IGHV2OR16-5 PE=4 SV=1
sp|P31025|LCN1_HUMAN	294000	438000	292000	331000	554000	472000	1	1.49	0.99	1.13	1.89	1.61	Lipocalin-1 OS=Homo sapiens OX=9606 GN=LCN1 PE=1 SV=1
sp|Q5VSP4|LC1L1_HUMAN	294000	438000	292000	331000	554000	472000	1	1.49	0.99	1.13	1.89	1.61	Putative lipocalin 1-like protein 1 OS=Homo sapiens OX=9606 GN=LCN1P1 PE=5 SV=1
G3V357|G3V357_HUMAN	1050000	996000	1140000	1210000	1170000	1250000	1	0.95	1.09	1.16	1.12	1.2	Ribonuclease pancreatic OS=Homo sapiens OX=9606 GN=RNASE1 PE=1 SV=1
sp|P07998|RNAS1_HUMAN	1050000	996000	1140000	1210000	1170000	1250000	1	0.95	1.09	1.16	1.12	1.2	Ribonuclease pancreatic OS=Homo sapiens OX=9606 GN=RNASE1 PE=1 SV=4
sp|Q92994|TF3B_HUMAN	8030000	10200000	8710000	7630000	10800000	11000000	1	1.27	1.08	0.95	1.34	1.37	Transcription factor IIIB 90 kDa subunit OS=Homo sapiens OX=9606 GN=BRF1 PE=1 SV=1
F8VWT8|F8VWT8_HUMAN	8030000	10200000	8710000	7630000	10800000	11000000	1	1.27	1.08	0.95	1.34	1.37	Transcription factor IIIB 90 kDa subunit (Fragment) OS=Homo sapiens OX=9606 GN=BRF1 PE=1 SV=1
Q3SYD7|Q3SYD7_HUMAN	8030000	10200000	8710000	7630000	10800000	11000000	1	1.27	1.08	0.95	1.34	1.37	BRF1 protein OS=Homo sapiens OX=9606 GN=BRF1 PE=1 SV=1
A3KN61|A3KN61_HUMAN	8030000	10200000	8710000	7630000	10800000	11000000	1	1.27	1.08	0.95	1.34	1.37	BRF1 protein OS=Homo sapiens OX=9606 GN=BRF1 PE=1 SV=1
H0YIV6|H0YIV6_HUMAN	8030000	10200000	8710000	7630000	10800000	11000000	1	1.27	1.08	0.95	1.34	1.37	Transcription factor IIIB 90 kDa subunit (Fragment) OS=Homo sapiens OX=9606 GN=BRF1 PE=1 SV=1
F8VS45|F8VS45_HUMAN	8030000	10200000	8710000	7630000	10800000	11000000	1	1.27	1.08	0.95	1.34	1.37	Transcription factor IIIB 90 kDa subunit (Fragment) OS=Homo sapiens OX=9606 GN=BRF1 PE=1 SV=2
F5H4B6|F5H4B6_HUMAN	512000	446000	469000	488000	587000	523000	1	0.87	0.92	0.95	1.15	1.02	Aldehyde dehydrogenase family 16 member A1 OS=Homo sapiens OX=9606 GN=ALDH16A1 PE=1 SV=1
sp|Q8IZ83|A16A1_HUMAN	512000	446000	469000	488000	587000	523000	1	0.87	0.92	0.95	1.15	1.02	Aldehyde dehydrogenase family 16 member A1 OS=Homo sapiens OX=9606 GN=ALDH16A1 PE=1 SV=2
sp|Q13296|SG2A2_HUMAN	1450000	1130000	699000	601000	1280000	664000	1	0.78	0.48	0.41	0.88	0.46	Mammaglobin-A OS=Homo sapiens OX=9606 GN=SCGB2A2 PE=1 SV=1
Q6NX70|Q6NX70_HUMAN	1450000	1130000	699000	601000	1280000	664000	1	0.78	0.48	0.41	0.88	0.46	Mammaglobin-A OS=Homo sapiens OX=9606 GN=SCGB2A2 PE=1 SV=1
H0Y4I5|H0Y4I5_HUMAN	11000000	40900000	12300000	8280000	10900000	28900000	1	3.73	1.13	0.75	1	2.63	Chondroadherin-like protein (Fragment) OS=Homo sapiens OX=9606 GN=CHADL PE=1 SV=1
sp|P05204|HMGN2_HUMAN	4400000	3340000	4420000	3840000	358000	422000	1	0.76	1	0.87	0.08	0.1	Non-histone chromosomal protein HMG-17 OS=Homo sapiens OX=9606 GN=HMGN2 PE=1 SV=3
H0Y5A1|H0Y5A1_HUMAN	2000000	1740000	1830000	2040000	1900000	1870000	1	0.87	0.92	1.02	0.95	0.93	Glutathione-independent PGD synthase (Fragment) OS=Homo sapiens OX=9606 GN=PTGDS PE=1 SV=2
sp|P41222|PTGDS_HUMAN	2000000	1740000	1830000	2040000	1900000	1870000	1	0.87	0.92	1.02	0.95	0.93	Prostaglandin-H2 D-isomerase OS=Homo sapiens OX=9606 GN=PTGDS PE=1 SV=1
Q5SQ11|Q5SQ11_HUMAN	2000000	1740000	1830000	2040000	1900000	1870000	1	0.87	0.92	1.02	0.95	0.93	Glutathione-independent PGD synthase (Fragment) OS=Homo sapiens OX=9606 GN=PTGDS PE=1 SV=1
H3BTU6|H3BTU6_HUMAN	636000	867000	493000	571000	649000	669000	1	1.36	0.78	0.9	1.02	1.05	Coronin (Fragment) OS=Homo sapiens OX=9606 GN=CORO1A PE=1 SV=1
H3BRY3|H3BRY3_HUMAN	636000	867000	493000	571000	649000	669000	1	1.36	0.78	0.9	1.02	1.05	Coronin OS=Homo sapiens OX=9606 GN=CORO1A PE=1 SV=1
sp|P31146|COR1A_HUMAN	636000	867000	493000	571000	649000	669000	1	1.36	0.78	0.9	1.02	1.05	Coronin-1A OS=Homo sapiens OX=9606 GN=CORO1A PE=1 SV=4
sp|Q9BX66|SRBS1_HUMAN	619000	755000	779000	575000	471000	484000	1	1.22	1.26	0.93	0.76	0.78	Sorbin and SH3 domain-containing protein 1 OS=Homo sapiens OX=9606 GN=SORBS1 PE=1 SV=3
A0A0U1RQI5|A0A0U1RQI5_HUMAN	619000	755000	779000	575000	471000	484000	1	1.22	1.26	0.93	0.76	0.78	Sorbin and SH3 domain-containing protein 1 (Fragment) OS=Homo sapiens OX=9606 GN=SORBS1 PE=1 SV=1
sp|Q08188|TGM3_HUMAN	966000	820000	503000	494000	983000	736000	1	0.85	0.52	0.51	1.02	0.76	Protein-glutamine gamma-glutamyltransferase E OS=Homo sapiens OX=9606 GN=TGM3 PE=1 SV=4
A0A494C0J7|A0A494C0J7_HUMAN	966000	820000	503000	494000	983000	736000	1	0.85	0.52	0.51	1.02	0.76	TGc domain-containing protein OS=Homo sapiens OX=9606 PE=3 SV=1
sp|O14617|AP3D1_HUMAN	493000	417000	594000	448000	125000	99200	1	0.85	1.21	0.91	0.25	0.2	AP-3 complex subunit delta-1 OS=Homo sapiens OX=9606 GN=AP3D1 PE=1 SV=1
sp|P13501|CCL5_HUMAN	673000	1610000	523000	1300000	396000	962000	1	2.39	0.78	1.94	0.59	1.43	C-C motif chemokine 5 OS=Homo sapiens OX=9606 GN=CCL5 PE=1 SV=3
A0A5F9ZH78|A0A5F9ZH78_HUMAN	647000	516000	462000	393000	676000	528000	1	0.8	0.71	0.61	1.05	0.82	Arginase-1 OS=Homo sapiens OX=9606 GN=ARG1 PE=1 SV=1
A0A5F9ZGN6|A0A5F9ZGN6_HUMAN	647000	516000	462000	393000	676000	528000	1	0.8	0.71	0.61	1.05	0.82	Arginase OS=Homo sapiens OX=9606 GN=ARG1 PE=1 SV=1
sp|P05089|ARGI1_HUMAN	647000	516000	462000	393000	676000	528000	1	0.8	0.71	0.61	1.05	0.82	Arginase-1 OS=Homo sapiens OX=9606 GN=ARG1 PE=1 SV=2
E9PJ94|E9PJ94_HUMAN	1950000	638000	1670000	604000	67000	89800	1	0.33	0.86	0.31	0.03	0.05	Tripartite motif-containing protein 29 (Fragment) OS=Homo sapiens OX=9606 GN=TRIM29 PE=1 SV=1
sp|Q01459|DIAC_HUMAN	625000	659000	817000	697000	429000	394000	1	1.05	1.31	1.12	0.69	0.63	Di-N-acetylchitobiase OS=Homo sapiens OX=9606 GN=CTBS PE=1 SV=1
sp|P15088|CBPA3_HUMAN	4320000	2370000	5790000	693000	402000	338000	1	0.55	1.34	0.16	0.09	0.08	Mast cell carboxypeptidase A OS=Homo sapiens OX=9606 GN=CPA3 PE=1 SV=2
sp|P13716|HEM2_HUMAN	423000	479000	366000	420000	950000	646000	1	1.13	0.87	0.99	2.25	1.53	Delta-aminolevulinic acid dehydratase OS=Homo sapiens OX=9606 GN=ALAD PE=1 SV=1
I3L4J1|I3L4J1_HUMAN	1390000	1360000	1280000	1270000	315000	228000	1	0.98	0.92	0.92	0.23	0.16	Vesicle-fusing ATPase (Fragment) OS=Homo sapiens OX=9606 PE=1 SV=3
sp|Q9UN37|VPS4A_HUMAN	1390000	1360000	1280000	1270000	315000	228000	1	0.98	0.92	0.92	0.23	0.16	Vacuolar protein sorting-associated protein 4A OS=Homo sapiens OX=9606 GN=VPS4A PE=1 SV=1
sp|Q8TDL5|BPIB1_HUMAN	344000	659000	416000	344000	1170000	416000	1	1.92	1.21	1	3.42	1.21	BPI fold-containing family B member 1 OS=Homo sapiens OX=9606 GN=BPIFB1 PE=1 SV=1
sp|Q08170|SRSF4_HUMAN	11500000	6930000	11600000	7460000	1260000	1320000	1	0.6	1	0.65	0.11	0.11	Serine/arginine-rich splicing factor 4 OS=Homo sapiens OX=9606 GN=SRSF4 PE=1 SV=2
A0A0D9SEM4|A0A0D9SEM4_HUMAN	11500000	6930000	11600000	7460000	1260000	1320000	1	0.6	1	0.65	0.11	0.11	Serine/arginine-rich-splicing factor 4 (Fragment) OS=Homo sapiens OX=9606 GN=SRSF4 PE=1 SV=1
A0A494C0I1|A0A494C0I1_HUMAN	230000	569000	197000	742000	104000	160000	1	2.48	0.86	3.23	0.45	0.7	General transcription factor II-I repeat domain-containing protein 2A OS=Homo sapiens OX=9606 GN=GTF2IRD2 PE=4 SV=1
sp|Q86UP8|GTD2A_HUMAN	230000	569000	197000	742000	104000	160000	1	2.48	0.86	3.23	0.45	0.7	General transcription factor II-I repeat domain-containing protein 2A OS=Homo sapiens OX=9606 GN=GTF2IRD2 PE=1 SV=3
V9GY55|V9GY55_HUMAN	1160000	1050000	942000	868000	999000	835000	1	0.9	0.81	0.75	0.86	0.72	Low affinity immunoglobulin gamma Fc region receptor II-a (Fragment) OS=Homo sapiens OX=9606 GN=FCGR2A PE=1 SV=1
sp|P12318|FCG2A_HUMAN	1160000	1050000	942000	868000	999000	835000	1	0.9	0.81	0.75	0.86	0.72	Low affinity immunoglobulin gamma Fc region receptor II-a OS=Homo sapiens OX=9606 GN=FCGR2A PE=1 SV=4
H0YGT0|H0YGT0_HUMAN	1160000	1050000	942000	868000	999000	835000	1	0.9	0.81	0.75	0.86	0.72	Low affinity immunoglobulin gamma Fc region receptor II-c OS=Homo sapiens OX=9606 GN=FCGR2C PE=4 SV=1
sp|P31995|FCG2C_HUMAN	1160000	1050000	942000	868000	999000	835000	1	0.9	0.81	0.75	0.86	0.72	Low affinity immunoglobulin gamma Fc region receptor II-c OS=Homo sapiens OX=9606 GN=FCGR2C PE=1 SV=1
sp|P16949|STMN1_HUMAN	505000	637000	353000	1070000	122000	140000	1	1.26	0.7	2.12	0.24	0.28	Stathmin OS=Homo sapiens OX=9606 GN=STMN1 PE=1 SV=3
sp|Q9UGI8|TES_HUMAN	451000	296000	297000	301000	57200	56700	1	0.66	0.66	0.67	0.13	0.13	Testin OS=Homo sapiens OX=9606 GN=TES PE=1 SV=1
H7BYK1|H7BYK1_HUMAN	451000	296000	297000	301000	57200	56700	1	0.66	0.66	0.67	0.13	0.13	Testin (Fragment) OS=Homo sapiens OX=9606 GN=TES PE=1 SV=1
A0A0G2JRQ6|A0A0G2JRQ6_HUMAN	20800000	10200000	28100000	16200000	18300000	29300000	1	0.49	1.35	0.78	0.88	1.41	Ig-like domain-containing protein (Fragment) OS=Homo sapiens OX=9606 PE=1 SV=4
A0A0A0MTA3|A0A0A0MTA3_HUMAN	3940000	5290000	5250000	4770000	4160000	5090000	1	1.34	1.33	1.21	1.06	1.29	Immunoglobulin kappa joining 5 (Fragment) OS=Homo sapiens OX=9606 GN=IGKJ5 PE=4 SV=1
F5H2R5|F5H2R5_HUMAN	719000	953000	715000	934000	1090000	628000	1	1.33	0.99	1.3	1.51	0.87	Rho GDP-dissociation inhibitor 2 (Fragment) OS=Homo sapiens OX=9606 GN=ARHGDIB PE=1 SV=1
F5H6Q0|F5H6Q0_HUMAN	719000	953000	715000	934000	1090000	628000	1	1.33	0.99	1.3	1.51	0.87	Rho GDP-dissociation inhibitor 2 (Fragment) OS=Homo sapiens OX=9606 GN=ARHGDIB PE=1 SV=1
F5H3P3|F5H3P3_HUMAN	719000	953000	715000	934000	1090000	628000	1	1.33	0.99	1.3	1.51	0.87	Rho GDP-dissociation inhibitor 2 (Fragment) OS=Homo sapiens OX=9606 GN=ARHGDIB PE=1 SV=8
H0YGX7|H0YGX7_HUMAN	719000	953000	715000	934000	1090000	628000	1	1.33	0.99	1.3	1.51	0.87	Rho GDP-dissociation inhibitor 2 (Fragment) OS=Homo sapiens OX=9606 GN=ARHGDIB PE=1 SV=1
sp|P52566|GDIR2_HUMAN	719000	953000	715000	934000	1090000	628000	1	1.33	0.99	1.3	1.51	0.87	Rho GDP-dissociation inhibitor 2 OS=Homo sapiens OX=9606 GN=ARHGDIB PE=1 SV=3
sp|Q7Z7G0|TARSH_HUMAN	885000	679000	837000	821000	516000	647000	1	0.77	0.95	0.93	0.58	0.73	Target of Nesh-SH3 OS=Homo sapiens OX=9606 GN=ABI3BP PE=1 SV=1
H0Y897|H0Y897_HUMAN	885000	679000	837000	821000	516000	647000	1	0.77	0.95	0.93	0.58	0.73	Target of Nesh-SH3 (Fragment) OS=Homo sapiens OX=9606 GN=ABI3BP PE=1 SV=1
H7C556|H7C556_HUMAN	885000	679000	837000	821000	516000	647000	1	0.77	0.95	0.93	0.58	0.73	Target of Nesh-SH3 OS=Homo sapiens OX=9606 GN=ABI3BP PE=1 SV=3
D3YTG3|D3YTG3_HUMAN	885000	679000	837000	821000	516000	647000	1	0.77	0.95	0.93	0.58	0.73	Target of Nesh-SH3 OS=Homo sapiens OX=9606 GN=ABI3BP PE=1 SV=2
H7C1I9|H7C1I9_HUMAN	1750000	1890000	2290000	1280000	1420000	1300000	1	1.08	1.31	0.73	0.81	0.74	Microtubule-associated serine/threonine-protein kinase 4 (Fragment) OS=Homo sapiens OX=9606 GN=MAST4 PE=1 SV=1
sp|A0A075B6H7|KV37_HUMAN	1210000	1660000	1330000	1480000	1650000	1520000	1	1.37	1.1	1.22	1.36	1.26	Probable non-functional immunoglobulin kappa variable 3-7 OS=Homo sapiens OX=9606 GN=IGKV3-7 PE=1 SV=1
sp|Q12841|FSTL1_HUMAN	744000	790000	957000	735000	829000	661000	1	1.06	1.29	0.99	1.11	0.89	Follistatin-related protein 1 OS=Homo sapiens OX=9606 GN=FSTL1 PE=1 SV=1
A0A2R8Y6L3|A0A2R8Y6L3_HUMAN	1980000	1680000	2910000	1660000	494000	427000	1	0.85	1.47	0.84	0.25	0.22	RPS10-NUDT3 readthrough (Fragment) OS=Homo sapiens OX=9606 GN=RPS10-NUDT3 PE=3 SV=1
sp|P46783|RS10_HUMAN	1980000	1680000	2910000	1660000	494000	427000	1	0.85	1.47	0.84	0.25	0.22	40S ribosomal protein S10 OS=Homo sapiens OX=9606 GN=RPS10 PE=1 SV=1
F6U211|F6U211_HUMAN	1980000	1680000	2910000	1660000	494000	427000	1	0.85	1.47	0.84	0.25	0.22	40S ribosomal protein S10 OS=Homo sapiens OX=9606 GN=RPS10 PE=3 SV=1
sp|Q9NQ39|RS10L_HUMAN	1980000	1680000	2910000	1660000	494000	427000	1	0.85	1.47	0.84	0.25	0.22	Putative 40S ribosomal protein S10-like OS=Homo sapiens OX=9606 GN=RPS10P5 PE=5 SV=1
A0A2R8Y7H1|A0A2R8Y7H1_HUMAN	1980000	1680000	2910000	1660000	494000	427000	1	0.85	1.47	0.84	0.25	0.22	40S ribosomal protein S10 OS=Homo sapiens OX=9606 GN=RPS10 PE=3 SV=1
S4R435|S4R435_HUMAN	1980000	1680000	2910000	1660000	494000	427000	1	0.85	1.47	0.84	0.25	0.22	RPS10-NUDT3 readthrough (Fragment) OS=Homo sapiens OX=9606 GN=RPS10-NUDT3 PE=3 SV=2
A0A2R8YFH6|A0A2R8YFH6_HUMAN	1980000	1680000	2910000	1660000	494000	427000	1	0.85	1.47	0.84	0.25	0.22	40S ribosomal protein S10 OS=Homo sapiens OX=9606 GN=RPS10 PE=3 SV=1
A0A1W2PQS6|A0A1W2PQS6_HUMAN	1980000	1680000	2910000	1660000	494000	427000	1	0.85	1.47	0.84	0.25	0.22	RPS10-NUDT3 readthrough OS=Homo sapiens OX=9606 GN=RPS10-NUDT3 PE=3 SV=1
sp|Q5T750|XP32_HUMAN	1280000	2150000	1220000	1350000	2870000	1760000	1	1.68	0.96	1.05	2.25	1.38	Skin-specific protein 32 OS=Homo sapiens OX=9606 GN=XP32 PE=1 SV=1
K7EKI8|K7EKI8_HUMAN	340000	204000	383000	169000	68000	36500	1	0.6	1.13	0.5	0.2	0.11	Periplakin OS=Homo sapiens OX=9606 GN=PPL PE=1 SV=1
K7EQ71|K7EQ71_HUMAN	340000	204000	383000	169000	68000	36500	1	0.6	1.13	0.5	0.2	0.11	Periplakin (Fragment) OS=Homo sapiens OX=9606 GN=PPL PE=1 SV=1
J3KMX3|J3KMX3_HUMAN	240000	178000	311000	288000	366000	341000	1	0.74	1.3	1.2	1.53	1.42	Alpha-fetoprotein OS=Homo sapiens OX=9606 GN=AFP PE=1 SV=1
H7C410|H7C410_HUMAN	6440000	4630000	7290000	3640000	3480000	2940000	1	0.72	1.13	0.57	0.54	0.46	Glypican-1 OS=Homo sapiens OX=9606 GN=GPC1 PE=1 SV=2
sp|P35052|GPC1_HUMAN	6440000	4630000	7290000	3640000	3480000	2940000	1	0.72	1.13	0.57	0.54	0.46	Glypican-1 OS=Homo sapiens OX=9606 GN=GPC1 PE=1 SV=2
H7BZL4|H7BZL4_HUMAN	6440000	4630000	7290000	3640000	3480000	2940000	1	0.72	1.13	0.57	0.54	0.46	Glypican-1 (Fragment) OS=Homo sapiens OX=9606 GN=GPC1 PE=1 SV=1
sp|O95292|VAPB_HUMAN	1250000	722000	1050000	969000	258000	245000	1	0.58	0.84	0.77	0.21	0.2	Vesicle-associated membrane protein-associated protein B/C OS=Homo sapiens OX=9606 GN=VAPB PE=1 SV=3
sp|P55103|INHBC_HUMAN	735000	627000	612000	650000	592000	484000	1	0.85	0.83	0.88	0.81	0.66	Inhibin beta C chain OS=Homo sapiens OX=9606 GN=INHBC PE=2 SV=1
sp|P78563|RED1_HUMAN	3980000	5220000	4600000	5830000	4440000	6510000	1	1.31	1.16	1.46	1.12	1.63	Double-stranded RNA-specific editase 1 OS=Homo sapiens OX=9606 GN=ADARB1 PE=1 SV=1
sp|Q7L0X0|TRIL_HUMAN	954000	692000	1380000	907000	675000	977000	1	0.73	1.45	0.95	0.71	1.02	TLR4 interactor with leucine rich repeats OS=Homo sapiens OX=9606 GN=TRIL PE=1 SV=2
sp|O95810|CAVN2_HUMAN	1080000	630000	536000	550000	607000	698000	1	0.59	0.5	0.51	0.56	0.65	Caveolae-associated protein 2 OS=Homo sapiens OX=9606 GN=CAVIN2 PE=1 SV=3
A0A0A0MT69|A0A0A0MT69_HUMAN	6940000	9090000	8510000	9830000	5770000	9060000	1	1.31	1.23	1.42	0.83	1.3	Immunoglobulin kappa joining 4 (Fragment) OS=Homo sapiens OX=9606 GN=IGKJ4 PE=1 SV=1
A0A2R8Y695|A0A2R8Y695_HUMAN	547000	1460000	638000	697000	870000	1230000	1	2.67	1.17	1.27	1.59	2.24	IQ motif and SEC7 domain-containing protein 1 (Fragment) OS=Homo sapiens OX=9606 GN=IQSEC1 PE=1 SV=1
A0A3B3IU98|A0A3B3IU98_HUMAN	547000	1460000	638000	697000	870000	1230000	1	2.67	1.17	1.27	1.59	2.24	IQ motif and SEC7 domain-containing protein 1 (Fragment) OS=Homo sapiens OX=9606 GN=IQSEC1 PE=1 SV=1
A0A2R8Y7T6|A0A2R8Y7T6_HUMAN	547000	1460000	638000	697000	870000	1230000	1	2.67	1.17	1.27	1.59	2.24	IQ motif and SEC7 domain-containing protein 1 OS=Homo sapiens OX=9606 GN=IQSEC1 PE=1 SV=1
sp|Q9BTC0|DIDO1_HUMAN	962000	769000	752000	819000	308000	305000	1	0.8	0.78	0.85	0.32	0.32	Death-inducer obliterator 1 OS=Homo sapiens OX=9606 GN=DIDO1 PE=1 SV=5
A0A7I2V659|A0A7I2V659_HUMAN	9320000	6570000	9520000	9700000	3020000	2920000	1	0.71	1.02	1.04	0.32	0.31	Elongation factor 1-alpha OS=Homo sapiens OX=9606 GN=EEF1A1 PE=1 SV=1
A0A087WV01|A0A087WV01_HUMAN	9320000	6570000	9520000	9700000	3020000	2920000	1	0.71	1.02	1.04	0.32	0.31	Elongation factor 1-alpha OS=Homo sapiens OX=9606 GN=EEF1A1 PE=1 SV=1
A0A7I2V5N4|A0A7I2V5N4_HUMAN	9320000	6570000	9520000	9700000	3020000	2920000	1	0.71	1.02	1.04	0.32	0.31	Elongation factor 1-alpha OS=Homo sapiens OX=9606 GN=EEF1A1 PE=1 SV=1
A0A087WVQ9|A0A087WVQ9_HUMAN	9320000	6570000	9520000	9700000	3020000	2920000	1	0.71	1.02	1.04	0.32	0.31	Elongation factor 1-alpha OS=Homo sapiens OX=9606 GN=EEF1A1 PE=1 SV=2
sp|Q5VTE0|EF1A3_HUMAN	9320000	6570000	9520000	9700000	3020000	2920000	1	0.71	1.02	1.04	0.32	0.31	Putative elongation factor 1-alpha-like 3 OS=Homo sapiens OX=9606 GN=EEF1A1P5 PE=5 SV=1
sp|P68104|EF1A1_HUMAN	9320000	6570000	9520000	9700000	3020000	2920000	1	0.71	1.02	1.04	0.32	0.31	Elongation factor 1-alpha 1 OS=Homo sapiens OX=9606 GN=EEF1A1 PE=1 SV=1
A0A494C1S7|A0A494C1S7_HUMAN	1520000	689000	369000	332000	1440000	525000	1	0.45	0.24	0.22	0.95	0.35	General transcription factor 3C polypeptide 3 OS=Homo sapiens OX=9606 GN=GTF3C3 PE=1 SV=1
sp|Q8NHM5|KDM2B_HUMAN	947000	989000	1170000	856000	1440000	2000000	1	1.04	1.24	0.9	1.52	2.12	Lysine-specific demethylase 2B OS=Homo sapiens OX=9606 GN=KDM2B PE=1 SV=1
F8WBN2|F8WBN2_HUMAN	947000	989000	1170000	856000	1440000	2000000	1	1.04	1.24	0.9	1.52	2.12	Lysine-specific demethylase 2B (Fragment) OS=Homo sapiens OX=9606 GN=KDM2B PE=1 SV=1
sp|Q9NXD2|MTMRA_HUMAN	1270000	1600000	2820000	2480000	1050000	1540000	1	1.27	2.23	1.96	0.83	1.22	Myotubularin-related protein 10 OS=Homo sapiens OX=9606 GN=MTMR10 PE=1 SV=3
A0A087WY61|A0A087WY61_HUMAN	2610000	1610000	2710000	1660000	452000	627000	1	0.62	1.04	0.63	0.17	0.24	Nuclear mitotic apparatus protein 1 OS=Homo sapiens OX=9606 GN=NUMA1 PE=1 SV=1
sp|Q14980|NUMA1_HUMAN	2610000	1610000	2710000	1660000	452000	627000	1	0.62	1.04	0.63	0.17	0.24	Nuclear mitotic apparatus protein 1 OS=Homo sapiens OX=9606 GN=NUMA1 PE=1 SV=2
H0YFY6|H0YFY6_HUMAN	2610000	1610000	2710000	1660000	452000	627000	1	0.62	1.04	0.63	0.17	0.24	Nuclear mitotic apparatus protein 1 (Fragment) OS=Homo sapiens OX=9606 GN=NUMA1 PE=1 SV=1
sp|Q13336|UT1_HUMAN	577000	838000	648000	581000	666000	587000	1	1.45	1.12	1.01	1.15	1.02	Urea transporter 1 OS=Homo sapiens OX=9606 GN=SLC14A1 PE=1 SV=2
F5GWS2|F5GWS2_HUMAN	577000	838000	648000	581000	666000	587000	1	1.45	1.12	1.01	1.15	1.02	Urea transporter 1 OS=Homo sapiens OX=9606 GN=SLC14A1 PE=1 SV=1
B4DFJ8|B4DFJ8_HUMAN	577000	838000	648000	581000	666000	587000	1	1.45	1.12	1.01	1.15	1.02	Urea transporter OS=Homo sapiens OX=9606 GN=SLC14A1 PE=1 SV=1
sp|Q9Y5Y7|LYVE1_HUMAN	2270000	3180000	2990000	3820000	2700000	4030000	1	1.4	1.32	1.68	1.19	1.77	Lymphatic vessel endothelial hyaluronic acid receptor 1 OS=Homo sapiens OX=9606 GN=LYVE1 PE=1 SV=2
sp|P26447|S10A4_HUMAN	321000	536000	385000	512000	495000	408000	1	1.67	1.2	1.6	1.54	1.27	Protein S100-A4 OS=Homo sapiens OX=9606 GN=S100A4 PE=1 SV=1
sp|O60841|IF2P_HUMAN	587000	361000	490000	634000	0	118000	1	0.61	0.83	1.08	0	0.2	Eukaryotic translation initiation factor 5B OS=Homo sapiens OX=9606 GN=EIF5B PE=1 SV=4
A0A087WUT6|A0A087WUT6_HUMAN	587000	361000	490000	634000	0	118000	1	0.61	0.83	1.08	0	0.2	Eukaryotic translation initiation factor 5B OS=Homo sapiens OX=9606 GN=EIF5B PE=1 SV=1
sp|Q13835|PKP1_HUMAN	310000	426000	339000	369000	378000	396000	1	1.38	1.09	1.19	1.22	1.28	Plakophilin-1 OS=Homo sapiens OX=9606 GN=PKP1 PE=1 SV=2
sp|Q9HC84|MUC5B_HUMAN	309000	729000	735000	520000	465000	321000	1	2.36	2.38	1.69	1.51	1.04	Mucin-5B OS=Homo sapiens OX=9606 GN=MUC5B PE=1 SV=3
H7C3E0|H7C3E0_HUMAN	95100	30300	93000	69900	77500	122000	1	0.32	0.98	0.74	0.82	1.29	Carboxy-terminal domain RNA polymerase II polypeptide A small phosphatase 1 (Fragment) OS=Homo sapiens OX=9606 GN=CTDSP1 PE=1 SV=8
H7C1Z7|H7C1Z7_HUMAN	95100	30300	93000	69900	77500	122000	1	0.32	0.98	0.74	0.82	1.29	Protein-serine/threonine phosphatase (Fragment) OS=Homo sapiens OX=9606 GN=CTDSP1 PE=1 SV=1
H7C270|H7C270_HUMAN	95100	30300	93000	69900	77500	122000	1	0.32	0.98	0.74	0.82	1.29	Protein-serine/threonine phosphatase (Fragment) OS=Homo sapiens OX=9606 GN=CTDSP1 PE=1 SV=1
sp|Q9GZU7|CTDS1_HUMAN	95100	30300	93000	69900	77500	122000	1	0.32	0.98	0.74	0.82	1.29	Carboxy-terminal domain RNA polymerase II polypeptide A small phosphatase 1 OS=Homo sapiens OX=9606 GN=CTDSP1 PE=1 SV=1
Q5T123|Q5T123_HUMAN	984000	1130000	674000	545000	805000	795000	1	1.15	0.68	0.55	0.82	0.81	SH3 domain-binding glutamic acid-rich-like protein 3 OS=Homo sapiens OX=9606 GN=SH3BGRL3 PE=1 SV=1
sp|Q9H299|SH3L3_HUMAN	984000	1130000	674000	545000	805000	795000	1	1.15	0.68	0.55	0.82	0.81	SH3 domain-binding glutamic acid-rich-like protein 3 OS=Homo sapiens OX=9606 GN=SH3BGRL3 PE=1 SV=1
sp|P43121|MUC18_HUMAN	655000	630000	800000	682000	545000	538000	1	0.96	1.22	1.04	0.83	0.82	Cell surface glycoprotein MUC18 OS=Homo sapiens OX=9606 GN=MCAM PE=1 SV=2
H0YD68|H0YD68_HUMAN	549000	1440000	729000	871000	4110000	1090000	1	2.62	1.33	1.59	7.48	1.98	Protein BCAP (Fragment) OS=Homo sapiens OX=9606 GN=ODF2L PE=1 SV=1
sp|Q9ULJ1|ODF2L_HUMAN	549000	1440000	729000	871000	4110000	1090000	1	2.62	1.33	1.59	7.48	1.98	Protein BCAP OS=Homo sapiens OX=9606 GN=ODF2L PE=2 SV=2
E9PNP0|E9PNP0_HUMAN	549000	1440000	729000	871000	4110000	1090000	1	2.62	1.33	1.59	7.48	1.98	Protein BCAP (Fragment) OS=Homo sapiens OX=9606 GN=ODF2L PE=1 SV=1
sp|Q6PKG0|LARP1_HUMAN	1110000	1080000	1240000	1320000	333000	264000	1	0.98	1.12	1.19	0.3	0.24	La-related protein 1 OS=Homo sapiens OX=9606 GN=LARP1 PE=1 SV=2
E5RHK4|E5RHK4_HUMAN	1110000	1080000	1240000	1320000	333000	264000	1	0.98	1.12	1.19	0.3	0.24	La-related protein 1 (Fragment) OS=Homo sapiens OX=9606 GN=LARP1 PE=1 SV=8
H0YBM7|H0YBM7_HUMAN	1110000	1080000	1240000	1320000	333000	264000	1	0.98	1.12	1.19	0.3	0.24	La-related protein 1 (Fragment) OS=Homo sapiens OX=9606 GN=LARP1 PE=1 SV=1
E5RH50|E5RH50_HUMAN	1110000	1080000	1240000	1320000	333000	264000	1	0.98	1.12	1.19	0.3	0.24	La-related protein 1 (Fragment) OS=Homo sapiens OX=9606 GN=LARP1 PE=1 SV=8
A0A0B4J210|A0A0B4J210_HUMAN	1110000	1080000	1240000	1320000	333000	264000	1	0.98	1.12	1.19	0.3	0.24	La-related protein 1 (Fragment) OS=Homo sapiens OX=9606 GN=LARP1 PE=1 SV=5
sp|A0A0B4J1V7|HV781_HUMAN	4750000	6450000	5570000	6510000	13900000	34100000	1	1.36	1.17	1.37	2.93	7.19	Probable non-functional immunoglobulin heavy variable 7-81 OS=Homo sapiens OX=9606 GN=IGHV7-81 PE=1 SV=1
sp|Q14254|FLOT2_HUMAN	655000	902000	706000	797000	891000	742000	1	1.38	1.08	1.22	1.36	1.13	Flotillin-2 OS=Homo sapiens OX=9606 GN=FLOT2 PE=1 SV=2
J3QLD9|J3QLD9_HUMAN	655000	902000	706000	797000	891000	742000	1	1.38	1.08	1.22	1.36	1.13	Flotillin OS=Homo sapiens OX=9606 GN=FLOT2 PE=1 SV=1
E7EMK3|E7EMK3_HUMAN	655000	902000	706000	797000	891000	742000	1	1.38	1.08	1.22	1.36	1.13	Flotillin OS=Homo sapiens OX=9606 GN=FLOT2 PE=1 SV=1
K7EKW9|K7EKW9_HUMAN	655000	902000	706000	797000	891000	742000	1	1.38	1.08	1.22	1.36	1.13	Flotillin (Fragment) OS=Homo sapiens OX=9606 GN=FLOT2 PE=1 SV=1
sp|Q5SZB4|CI050_HUMAN	6380000	3760000	6180000	6250000	6880000	6490000	1	0.59	0.97	0.98	1.08	1.02	Uncharacterized protein C9orf50 OS=Homo sapiens OX=9606 GN=C9orf50 PE=2 SV=1
A0A7I2V2S7|A0A7I2V2S7_HUMAN	2140000	1410000	1940000	2020000	145000	205000	1	0.66	0.91	0.94	0.07	0.1	75 kDa glucose-regulated protein OS=Homo sapiens OX=9606 GN=HSPA9 PE=1 SV=1
A0A7I2YQB2|A0A7I2YQB2_HUMAN	2140000	1410000	1940000	2020000	145000	205000	1	0.66	0.91	0.94	0.07	0.1	75 kDa glucose-regulated protein OS=Homo sapiens OX=9606 GN=HSPA9 PE=1 SV=1
A0A7I2V3F7|A0A7I2V3F7_HUMAN	2140000	1410000	1940000	2020000	145000	205000	1	0.66	0.91	0.94	0.07	0.1	Stress-70 protein mitochondrial OS=Homo sapiens OX=9606 GN=HSPA9 PE=1 SV=1
A0A7I2V2G2|A0A7I2V2G2_HUMAN	2140000	1410000	1940000	2020000	145000	205000	1	0.66	0.91	0.94	0.07	0.1	75 kDa glucose-regulated protein OS=Homo sapiens OX=9606 GN=HSPA9 PE=1 SV=1
sp|P38646|GRP75_HUMAN	2140000	1410000	1940000	2020000	145000	205000	1	0.66	0.91	0.94	0.07	0.1	Stress-70 protein mitochondrial OS=Homo sapiens OX=9606 GN=HSPA9 PE=1 SV=2
E5RK62|E5RK62_HUMAN	608000	1200000	650000	591000	460000	560000	1	1.97	1.07	0.97	0.76	0.92	Osteonectin (Fragment) OS=Homo sapiens OX=9606 GN=SPARC PE=1 SV=1
F5GY03|F5GY03_HUMAN	608000	1200000	650000	591000	460000	560000	1	1.97	1.07	0.97	0.76	0.92	Osteonectin (Fragment) OS=Homo sapiens OX=9606 GN=SPARC PE=1 SV=1
sp|P09486|SPRC_HUMAN	608000	1200000	650000	591000	460000	560000	1	1.97	1.07	0.97	0.76	0.92	SPARC OS=Homo sapiens OX=9606 GN=SPARC PE=1 SV=1
sp|Q9ULD8|KCNH3_HUMAN	356000	304000	275000	225000	321000	262000	1	0.85	0.77	0.63	0.9	0.74	Potassium voltage-gated channel subfamily H member 3 OS=Homo sapiens OX=9606 GN=KCNH3 PE=1 SV=2
sp|P47929|LEG7_HUMAN	1280000	1220000	968000	909000	963000	934000	1	0.95	0.75	0.71	0.75	0.73	Galectin-7 OS=Homo sapiens OX=9606 GN=LGALS7B PE=1 SV=2
sp|P42166|LAP2A_HUMAN	117000	123000	118000	111000	113000	116000	1	1.05	1.01	0.95	0.96	0.99	Lamina-associated polypeptide 2 isoform alpha OS=Homo sapiens OX=9606 GN=TMPO PE=1 SV=2
sp|Q9NZT1|CALL5_HUMAN	4540000	3260000	4330000	3520000	4690000	4060000	1	0.72	0.95	0.77	1.03	0.89	Calmodulin-like protein 5 OS=Homo sapiens OX=9606 GN=CALML5 PE=1 SV=2
Q5SR47|Q5SR47_HUMAN	759000	1590000	1070000	695000	644000	777000	1	2.09	1.41	0.92	0.85	1.02	Complement receptor type 2 OS=Homo sapiens OX=9606 GN=CR2 PE=1 SV=1
sp|P20023|CR2_HUMAN	759000	1590000	1070000	695000	644000	777000	1	2.09	1.41	0.92	0.85	1.02	Complement receptor type 2 OS=Homo sapiens OX=9606 GN=CR2 PE=1 SV=2
sp|P11169|GTR3_HUMAN	429000	462000	307000	388000	328000	620000	1	1.08	0.72	0.9	0.76	1.45	Solute carrier family 2 facilitated glucose transporter member 3 OS=Homo sapiens OX=9606 GN=SLC2A3 PE=1 SV=1
sp|Q8TDB8|GTR14_HUMAN	429000	462000	307000	388000	328000	620000	1	1.08	0.72	0.9	0.76	1.45	Solute carrier family 2 facilitated glucose transporter member 14 OS=Homo sapiens OX=9606 GN=SLC2A14 PE=1 SV=1
sp|Q96RW7|HMCN1_HUMAN	611000	801000	815000	708000	661000	697000	1	1.31	1.34	1.16	1.08	1.14	Hemicentin-1 OS=Homo sapiens OX=9606 GN=HMCN1 PE=1 SV=2
F8W870|F8W870_HUMAN	1750000	1620000	2100000	1650000	1590000	1870000	1	0.92	1.2	0.94	0.91	1.07	Noelin (Fragment) OS=Homo sapiens OX=9606 GN=OLFM1 PE=1 SV=1
F5GZQ2|F5GZQ2_HUMAN	1750000	1620000	2100000	1650000	1590000	1870000	1	0.92	1.2	0.94	0.91	1.07	Noelin (Fragment) OS=Homo sapiens OX=9606 GN=OLFM1 PE=1 SV=1
F5H810|F5H810_HUMAN	1750000	1620000	2100000	1650000	1590000	1870000	1	0.92	1.2	0.94	0.91	1.07	Noelin (Fragment) OS=Homo sapiens OX=9606 GN=OLFM1 PE=1 SV=1
sp|Q99784|NOE1_HUMAN	1750000	1620000	2100000	1650000	1590000	1870000	1	0.92	1.2	0.94	0.91	1.07	Noelin OS=Homo sapiens OX=9606 GN=OLFM1 PE=1 SV=4
E7EVJ3|E7EVJ3_HUMAN	95100000	93400000	122000000	116000000	73400000	90500000	1	0.98	1.28	1.22	0.77	0.95	[Heparan sulfate]-glucosamine N-sulfotransferase OS=Homo sapiens OX=9606 GN=NDST1 PE=1 SV=1
sp|P52848|NDST1_HUMAN	95100000	93400000	122000000	116000000	73400000	90500000	1	0.98	1.28	1.22	0.77	0.95	Bifunctional heparan sulfate N-deacetylase/N-sulfotransferase 1 OS=Homo sapiens OX=9606 GN=NDST1 PE=1 SV=1
A0A0A0MT39|A0A0A0MT39_HUMAN	3100000	851000	477000	544000	665000	916000	1	0.27	0.15	0.18	0.21	0.3	Sodium channel protein OS=Homo sapiens OX=9606 GN=SCN5A PE=1 SV=1
sp|Q14524|SCN5A_HUMAN	3100000	851000	477000	544000	665000	916000	1	0.27	0.15	0.18	0.21	0.3	Sodium channel protein type 5 subunit alpha OS=Homo sapiens OX=9606 GN=SCN5A PE=1 SV=2
K4DIA1|K4DIA1_HUMAN	3100000	851000	477000	544000	665000	916000	1	0.27	0.15	0.18	0.21	0.3	Sodium channel protein OS=Homo sapiens OX=9606 GN=SCN5A PE=3 SV=1
E9PHB6|E9PHB6_HUMAN	3100000	851000	477000	544000	665000	916000	1	0.27	0.15	0.18	0.21	0.3	Sodium channel protein OS=Homo sapiens OX=9606 GN=SCN5A PE=1 SV=1
H9KVD2|H9KVD2_HUMAN	3100000	851000	477000	544000	665000	916000	1	0.27	0.15	0.18	0.21	0.3	Sodium channel protein OS=Homo sapiens OX=9606 GN=SCN5A PE=1 SV=1
E9PG18|E9PG18_HUMAN	3100000	851000	477000	544000	665000	916000	1	0.27	0.15	0.18	0.21	0.3	Sodium channel protein OS=Homo sapiens OX=9606 GN=SCN5A PE=3 SV=1
sp|Q6KB66|K2C80_HUMAN	348000	472000	292000	297000	544000	428000	1	1.36	0.84	0.85	1.56	1.23	Keratin type II cytoskeletal 80 OS=Homo sapiens OX=9606 GN=KRT80 PE=1 SV=2
S4R2Y3|S4R2Y3_HUMAN	4240000	4160000	4040000	4110000	1350000	1330000	1	0.98	0.95	0.97	0.32	0.32	Vacuolar protein sorting-associated protein 26A OS=Homo sapiens OX=9606 GN=VPS26A PE=1 SV=1
S4R3Q6|S4R3Q6_HUMAN	4240000	4160000	4040000	4110000	1350000	1330000	1	0.98	0.95	0.97	0.32	0.32	Vacuolar protein sorting-associated protein 26A OS=Homo sapiens OX=9606 GN=VPS26A PE=1 SV=1
sp|O75436|VP26A_HUMAN	4240000	4160000	4040000	4110000	1350000	1330000	1	0.98	0.95	0.97	0.32	0.32	Vacuolar protein sorting-associated protein 26A OS=Homo sapiens OX=9606 GN=VPS26A PE=1 SV=2
sp|Q8IZJ1|UNC5B_HUMAN	552000	1210000	682000	781000	717000	645000	1	2.2	1.23	1.41	1.3	1.17	Netrin receptor UNC5B OS=Homo sapiens OX=9606 GN=UNC5B PE=1 SV=2
sp|P61927|RL37_HUMAN	2060000	2620000	2750000	2760000	396000	450000	1	1.27	1.34	1.34	0.19	0.22	60S ribosomal protein L37 OS=Homo sapiens OX=9606 GN=RPL37 PE=1 SV=2
A0A087WTB5|A0A087WTB5_HUMAN	670000	1570000	677000	543000	592000	495000	1	2.34	1.01	0.81	0.88	0.74	Interleukin-6 receptor subunit alpha OS=Homo sapiens OX=9606 GN=IL6R PE=1 SV=1
sp|P08887|IL6RA_HUMAN	670000	1570000	677000	543000	592000	495000	1	2.34	1.01	0.81	0.88	0.74	Interleukin-6 receptor subunit alpha OS=Homo sapiens OX=9606 GN=IL6R PE=1 SV=1
D6R9R8|D6R9R8_HUMAN	670000	1570000	677000	543000	592000	495000	1	2.34	1.01	0.81	0.88	0.74	Interleukin-6 receptor subunit alpha (Fragment) OS=Homo sapiens OX=9606 GN=IL6R PE=1 SV=8
H0Y9B1|H0Y9B1_HUMAN	670000	1570000	677000	543000	592000	495000	1	2.34	1.01	0.81	0.88	0.74	Interleukin-6 receptor subunit alpha (Fragment) OS=Homo sapiens OX=9606 GN=IL6R PE=1 SV=1
sp|Q9Y4D8|HECD4_HUMAN	1600000	621000	919000	549000	1060000	631000	1	0.39	0.58	0.34	0.66	0.39	Probable E3 ubiquitin-protein ligase HECTD4 OS=Homo sapiens OX=9606 GN=HECTD4 PE=1 SV=5
F8VWT9|F8VWT9_HUMAN	1600000	621000	919000	549000	1060000	631000	1	0.39	0.58	0.34	0.66	0.39	Probable E3 ubiquitin-protein ligase HECTD4 OS=Homo sapiens OX=9606 GN=HECTD4 PE=1 SV=2
J3KPF0|J3KPF0_HUMAN	1600000	621000	919000	549000	1060000	631000	1	0.39	0.58	0.34	0.66	0.39	Probable E3 ubiquitin-protein ligase HECTD4 OS=Homo sapiens OX=9606 GN=HECTD4 PE=1 SV=3
sp|Q8NDX1|PSD4_HUMAN	114000	138000	147000	114000	158000	122000	1	1.21	1.29	1	1.38	1.07	PH and SEC7 domain-containing protein 4 OS=Homo sapiens OX=9606 GN=PSD4 PE=1 SV=2
H3BN78|H3BN78_HUMAN	406000	420000	482000	316000	506000	518000	1	1.04	1.19	0.78	1.25	1.28	Synaptotagmin XVII OS=Homo sapiens OX=9606 GN=SYT17 PE=1 SV=1
F8WE65|F8WE65_HUMAN	1740000	1750000	1520000	1070000	2050000	1650000	1	1.01	0.87	0.61	1.18	0.95	Peptidyl-prolyl cis-trans isomerase OS=Homo sapiens OX=9606 GN=PPIA PE=1 SV=1
C9J5S7|C9J5S7_HUMAN	1740000	1750000	1520000	1070000	2050000	1650000	1	1.01	0.87	0.61	1.18	0.95	Peptidyl-prolyl cis-trans isomerase OS=Homo sapiens OX=9606 GN=PPIA PE=1 SV=1
sp|A0A075B759|PAL4E_HUMAN	1740000	1750000	1520000	1070000	2050000	1650000	1	1.01	0.87	0.61	1.18	0.95	Peptidyl-prolyl cis-trans isomerase A-like 4E OS=Homo sapiens OX=9606 GN=PPIAL4E PE=3 SV=1
sp|Q9Y536|PAL4A_HUMAN	1740000	1750000	1520000	1070000	2050000	1650000	1	1.01	0.87	0.61	1.18	0.95	Peptidyl-prolyl cis-trans isomerase A-like 4A OS=Homo sapiens OX=9606 GN=PPIAL4A PE=2 SV=1
sp|A0A075B767|PAL4H_HUMAN	1740000	1750000	1520000	1070000	2050000	1650000	1	1.01	0.87	0.61	1.18	0.95	Peptidyl-prolyl cis-trans isomerase A-like 4H OS=Homo sapiens OX=9606 GN=PPIAL4H PE=3 SV=1
sp|F5H284|PAL4D_HUMAN	1740000	1750000	1520000	1070000	2050000	1650000	1	1.01	0.87	0.61	1.18	0.95	Peptidyl-prolyl cis-trans isomerase A-like 4D OS=Homo sapiens OX=9606 GN=PPIAL4D PE=3 SV=1
sp|P0DN37|PAL4G_HUMAN	1740000	1750000	1520000	1070000	2050000	1650000	1	1.01	0.87	0.61	1.18	0.95	Peptidyl-prolyl cis-trans isomerase A-like 4G OS=Homo sapiens OX=9606 GN=PPIAL4G PE=3 SV=1
sp|A0A0B4J2A2|PAL4C_HUMAN	1740000	1750000	1520000	1070000	2050000	1650000	1	1.01	0.87	0.61	1.18	0.95	Peptidyl-prolyl cis-trans isomerase A-like 4C OS=Homo sapiens OX=9606 GN=PPIAL4C PE=2 SV=1
A0A0H2UH34|A0A0H2UH34_HUMAN	1740000	1750000	1520000	1070000	2050000	1650000	1	1.01	0.87	0.61	1.18	0.95	Peptidyl-prolyl cis-trans isomerase OS=Homo sapiens OX=9606 GN=PPIAL4F PE=1 SV=1
sp|P0DN26|PAL4F_HUMAN	1740000	1750000	1520000	1070000	2050000	1650000	1	1.01	0.87	0.61	1.18	0.95	Peptidyl-prolyl cis-trans isomerase A-like 4F OS=Homo sapiens OX=9606 GN=PPIAL4F PE=3 SV=1
sp|P62937|PPIA_HUMAN	1740000	1750000	1520000	1070000	2050000	1650000	1	1.01	0.87	0.61	1.18	0.95	Peptidyl-prolyl cis-trans isomerase A OS=Homo sapiens OX=9606 GN=PPIA PE=1 SV=2
F5H2B5|F5H2B5_HUMAN	359000	522000	699000	432000	469000	322000	1	1.45	1.95	1.2	1.31	0.9	5'-3' exonuclease PLD4 OS=Homo sapiens OX=9606 GN=PLD4 PE=1 SV=1
A0A7P0TA58|A0A7P0TA58_HUMAN	1060000	1220000	1210000	1010000	1030000	857000	1	1.15	1.14	0.95	0.97	0.81	Ephrin type-A receptor 7 OS=Homo sapiens OX=9606 GN=EPHA7 PE=4 SV=1
sp|Q15375|EPHA7_HUMAN	1060000	1220000	1210000	1010000	1030000	857000	1	1.15	1.14	0.95	0.97	0.81	Ephrin type-A receptor 7 OS=Homo sapiens OX=9606 GN=EPHA7 PE=1 SV=3
sp|Q9UBT6|POLK_HUMAN	2260000	3130000	2660000	4320000	3310000	2910000	1	1.38	1.17	1.91	1.46	1.29	DNA polymerase kappa OS=Homo sapiens OX=9606 GN=POLK PE=1 SV=1
sp|Q8N5C6|SRBD1_HUMAN	901000	2100000	1020000	713000	1130000	1140000	1	2.33	1.13	0.79	1.26	1.27	S1 RNA-binding domain-containing protein 1 OS=Homo sapiens OX=9606 GN=SRBD1 PE=1 SV=2
A0A3B3ISG5|A0A3B3ISG5_HUMAN	990000	729000	981000	798000	927000	931000	1	0.74	0.99	0.81	0.94	0.94	Insulin-degrading enzyme OS=Homo sapiens OX=9606 GN=IDE PE=1 SV=1
A0A7I2V610|A0A7I2V610_HUMAN	990000	729000	981000	798000	927000	931000	1	0.74	0.99	0.81	0.94	0.94	Insulin-degrading enzyme OS=Homo sapiens OX=9606 GN=IDE PE=1 SV=1
A0A7I2V4Q3|A0A7I2V4Q3_HUMAN	990000	729000	981000	798000	927000	931000	1	0.74	0.99	0.81	0.94	0.94	Insulin-degrading enzyme OS=Homo sapiens OX=9606 GN=IDE PE=1 SV=1
A0A7I2YQS6|A0A7I2YQS6_HUMAN	990000	729000	981000	798000	927000	931000	1	0.74	0.99	0.81	0.94	0.94	Insulin-degrading enzyme OS=Homo sapiens OX=9606 GN=IDE PE=1 SV=1
A0A7I2V612|A0A7I2V612_HUMAN	990000	729000	981000	798000	927000	931000	1	0.74	0.99	0.81	0.94	0.94	Insulin-degrading enzyme OS=Homo sapiens OX=9606 GN=IDE PE=1 SV=1
A0A7P0T9G4|A0A7P0T9G4_HUMAN	1880000	1710000	1860000	1350000	1910000	1940000	1	0.91	0.99	0.72	1.02	1.03	Chimeric ERCC6-PGBD3 protein OS=Homo sapiens OX=9606 GN=ERCC6 PE=4 SV=1
sp|Q03468|ERCC6_HUMAN	1880000	1710000	1860000	1350000	1910000	1940000	1	0.91	0.99	0.72	1.02	1.03	DNA excision repair protein ERCC-6 OS=Homo sapiens OX=9606 GN=ERCC6 PE=1 SV=1
A0A2R8YEF0|A0A2R8YEF0_HUMAN	1830000	1300000	2100000	2520000	1830000	3140000	1	0.71	1.15	1.37	1	1.72	Transporter OS=Homo sapiens OX=9606 GN=SLC6A1 PE=1 SV=1
A0A2R8Y3X2|A0A2R8Y3X2_HUMAN	1830000	1300000	2100000	2520000	1830000	3140000	1	0.71	1.15	1.37	1	1.72	Transporter OS=Homo sapiens OX=9606 GN=SLC6A1 PE=1 SV=1
A0A2R8Y495|A0A2R8Y495_HUMAN	1830000	1300000	2100000	2520000	1830000	3140000	1	0.71	1.15	1.37	1	1.72	Transporter OS=Homo sapiens OX=9606 GN=SLC6A1 PE=1 SV=1
A0A2R8YCM3|A0A2R8YCM3_HUMAN	1830000	1300000	2100000	2520000	1830000	3140000	1	0.71	1.15	1.37	1	1.72	Transporter OS=Homo sapiens OX=9606 GN=SLC6A1 PE=1 SV=1
sp|P30531|SC6A1_HUMAN	1830000	1300000	2100000	2520000	1830000	3140000	1	0.71	1.15	1.37	1	1.72	Sodium- and chloride-dependent GABA transporter 1 OS=Homo sapiens OX=9606 GN=SLC6A1 PE=1 SV=2
A0A2R8YDD5|A0A2R8YDD5_HUMAN	1830000	1300000	2100000	2520000	1830000	3140000	1	0.71	1.15	1.37	1	1.72	Transporter OS=Homo sapiens OX=9606 GN=SLC6A1 PE=1 SV=1
sp|Q96KR1|ZFR_HUMAN	733000	771000	763000	620000	634000	616000	1	1.05	1.04	0.84	0.86	0.84	Zinc finger RNA-binding protein OS=Homo sapiens OX=9606 GN=ZFR PE=1 SV=2
sp|Q8NFT6|DBF4B_HUMAN	726000	1310000	579000	833000	2000000	880000	1	1.8	0.8	1.15	2.76	1.21	Protein DBF4 homolog B OS=Homo sapiens OX=9606 GN=DBF4B PE=1 SV=1
sp|Q9HCS7|SYF1_HUMAN	2470000	2850000	2870000	3380000	4660000	3030000	1	1.16	1.16	1.37	1.89	1.23	Pre-mRNA-splicing factor SYF1 OS=Homo sapiens OX=9606 GN=XAB2 PE=1 SV=2
sp|Q8IZD9|DOCK3_HUMAN	553000	839000	602000	476000	616000	522000	1	1.52	1.09	0.86	1.11	0.94	Dedicator of cytokinesis protein 3 OS=Homo sapiens OX=9606 GN=DOCK3 PE=1 SV=1
A0A6Q8PFM8|A0A6Q8PFM8_HUMAN	45600	39600	47000	64500	23500	45000	1	0.87	1.03	1.42	0.51	0.99	Sodium channel protein OS=Homo sapiens OX=9606 GN=SCN11A PE=1 SV=1
A0A494C165|A0A494C165_HUMAN	400000	261000	344000	167000	217000	243000	1	0.65	0.86	0.42	0.54	0.61	Xaa-Pro dipeptidase (Fragment) OS=Homo sapiens OX=9606 GN=PEPD PE=1 SV=1
sp|Q7Z591|AKNA_HUMAN	1170000	3300000	861000	1130000	1270000	1040000	1	2.82	0.74	0.97	1.08	0.89	Microtubule organization protein AKNA OS=Homo sapiens OX=9606 GN=AKNA PE=1 SV=2
sp|Q3YEC7|RABL6_HUMAN	1070000	989000	1210000	1250000	292000	394000	1	0.92	1.13	1.17	0.27	0.37	Rab-like protein 6 OS=Homo sapiens OX=9606 GN=RABL6 PE=1 SV=2
sp|Q01995|TAGL_HUMAN	3850000	3080000	2980000	1970000	270000	371000	1	0.8	0.77	0.51	0.07	0.1	Transgelin OS=Homo sapiens OX=9606 GN=TAGLN PE=1 SV=4
H7C3W4|H7C3W4_HUMAN	763000	1020000	1050000	890000	840000	994000	1	1.33	1.37	1.17	1.1	1.3	Interleukin-1 receptor accessory protein (Fragment) OS=Homo sapiens OX=9606 GN=IL1RAP PE=1 SV=1
C9J9W1|C9J9W1_HUMAN	763000	1020000	1050000	890000	840000	994000	1	1.33	1.37	1.17	1.1	1.3	Interleukin-1 receptor accessory protein OS=Homo sapiens OX=9606 GN=IL1RAP PE=1 SV=1
sp|Q9NPH3|IL1AP_HUMAN	763000	1020000	1050000	890000	840000	994000	1	1.33	1.37	1.17	1.1	1.3	Interleukin-1 receptor accessory protein OS=Homo sapiens OX=9606 GN=IL1RAP PE=1 SV=2
A0A6I8PLB8|A0A6I8PLB8_HUMAN	160000	278000	203000	308000	227000	238000	1	1.74	1.27	1.92	1.42	1.49	Leucyl-tRNA synthetase OS=Homo sapiens OX=9606 GN=LARS1 PE=1 SV=1
A0A6I8PIT3|A0A6I8PIT3_HUMAN	160000	278000	203000	308000	227000	238000	1	1.74	1.27	1.92	1.42	1.49	Leucyl-tRNA synthetase OS=Homo sapiens OX=9606 GN=LARS1 PE=1 SV=1
A0A6I8PIV1|A0A6I8PIV1_HUMAN	160000	278000	203000	308000	227000	238000	1	1.74	1.27	1.92	1.42	1.49	Leucyl-tRNA synthetase OS=Homo sapiens OX=9606 GN=LARS1 PE=1 SV=1
sp|Q9P2J5|SYLC_HUMAN	160000	278000	203000	308000	227000	238000	1	1.74	1.27	1.92	1.42	1.49	Leucine--tRNA ligase cytoplasmic OS=Homo sapiens OX=9606 GN=LARS1 PE=1 SV=2
A0A2R8Y6T6|A0A2R8Y6T6_HUMAN	1990000	1770000	1560000	1720000	3680000	2670000	1	0.89	0.79	0.87	1.86	1.35	Protein 4.1 (Fragment) OS=Homo sapiens OX=9606 GN=EPB41 PE=1 SV=1
A0A2R8Y4N6|A0A2R8Y4N6_HUMAN	1990000	1770000	1560000	1720000	3680000	2670000	1	0.89	0.79	0.87	1.86	1.35	Band 4.1 (Fragment) OS=Homo sapiens OX=9606 GN=EPB41 PE=1 SV=1
A0A3B3ITP0|A0A3B3ITP0_HUMAN	1990000	1770000	1560000	1720000	3680000	2670000	1	0.89	0.79	0.87	1.86	1.35	Band 4.1 OS=Homo sapiens OX=9606 GN=EPB41 PE=1 SV=1
A0A2R8Y420|A0A2R8Y420_HUMAN	1990000	1770000	1560000	1720000	3680000	2670000	1	0.89	0.79	0.87	1.86	1.35	Band 4.1 OS=Homo sapiens OX=9606 GN=EPB41 PE=1 SV=1
A0A2R8Y7N0|A0A2R8Y7N0_HUMAN	1990000	1770000	1560000	1720000	3680000	2670000	1	0.89	0.79	0.87	1.86	1.35	Band 4.1 OS=Homo sapiens OX=9606 GN=EPB41 PE=1 SV=1
A0A2R8Y7Y3|A0A2R8Y7Y3_HUMAN	1990000	1770000	1560000	1720000	3680000	2670000	1	0.89	0.79	0.87	1.86	1.35	Band 4.1 OS=Homo sapiens OX=9606 GN=EPB41 PE=1 SV=1
A0A3B3IUD6|A0A3B3IUD6_HUMAN	1990000	1770000	1560000	1720000	3680000	2670000	1	0.89	0.79	0.87	1.86	1.35	Band 4.1 OS=Homo sapiens OX=9606 GN=EPB41 PE=1 SV=1
A0A2R8YD30|A0A2R8YD30_HUMAN	1990000	1770000	1560000	1720000	3680000	2670000	1	0.89	0.79	0.87	1.86	1.35	Band 4.1 OS=Homo sapiens OX=9606 GN=EPB41 PE=1 SV=1
A0A2R8YFR9|A0A2R8YFR9_HUMAN	1990000	1770000	1560000	1720000	3680000	2670000	1	0.89	0.79	0.87	1.86	1.35	Band 4.1 (Fragment) OS=Homo sapiens OX=9606 GN=EPB41 PE=1 SV=1
A0A2R8Y6G5|A0A2R8Y6G5_HUMAN	1990000	1770000	1560000	1720000	3680000	2670000	1	0.89	0.79	0.87	1.86	1.35	Band 4.1 OS=Homo sapiens OX=9606 GN=EPB41 PE=1 SV=1
A0A2R8YCW8|A0A2R8YCW8_HUMAN	1990000	1770000	1560000	1720000	3680000	2670000	1	0.89	0.79	0.87	1.86	1.35	Band 4.1 OS=Homo sapiens OX=9606 GN=EPB41 PE=1 SV=1
A0A2R8Y570|A0A2R8Y570_HUMAN	1990000	1770000	1560000	1720000	3680000	2670000	1	0.89	0.79	0.87	1.86	1.35	Band 4.1 OS=Homo sapiens OX=9606 GN=EPB41 PE=1 SV=1
A0A2R8Y5G2|A0A2R8Y5G2_HUMAN	1990000	1770000	1560000	1720000	3680000	2670000	1	0.89	0.79	0.87	1.86	1.35	Band 4.1 OS=Homo sapiens OX=9606 GN=EPB41 PE=1 SV=1
A0A2R8Y5Z6|A0A2R8Y5Z6_HUMAN	1990000	1770000	1560000	1720000	3680000	2670000	1	0.89	0.79	0.87	1.86	1.35	Band 4.1 OS=Homo sapiens OX=9606 GN=EPB41 PE=1 SV=1
A0A3B3IU06|A0A3B3IU06_HUMAN	1990000	1770000	1560000	1720000	3680000	2670000	1	0.89	0.79	0.87	1.86	1.35	Band 4.1 OS=Homo sapiens OX=9606 GN=EPB41 PE=1 SV=1
A0A2U3TZH6|A0A2U3TZH6_HUMAN	1990000	1770000	1560000	1720000	3680000	2670000	1	0.89	0.79	0.87	1.86	1.35	Band 4.1 OS=Homo sapiens OX=9606 GN=EPB41 PE=1 SV=1
sp|P11171|EPB41_HUMAN	1990000	1770000	1560000	1720000	3680000	2670000	1	0.89	0.79	0.87	1.86	1.35	Protein 4.1 OS=Homo sapiens OX=9606 GN=EPB41 PE=1 SV=4
A0A1B0GWG0|A0A1B0GWG0_HUMAN	1990000	1770000	1560000	1720000	3680000	2670000	1	0.89	0.79	0.87	1.86	1.35	Band 4.1 (Fragment) OS=Homo sapiens OX=9606 GN=EPB41 PE=1 SV=1
A0A2R8Y6D0|A0A2R8Y6D0_HUMAN	1990000	1770000	1560000	1720000	3680000	2670000	1	0.89	0.79	0.87	1.86	1.35	Band 4.1 OS=Homo sapiens OX=9606 GN=EPB41 PE=1 SV=1
A0A3B3ITC5|A0A3B3ITC5_HUMAN	1990000	1770000	1560000	1720000	3680000	2670000	1	0.89	0.79	0.87	1.86	1.35	Band 4.1 OS=Homo sapiens OX=9606 GN=EPB41 PE=1 SV=1
A0A0B4J2B8|A0A0B4J2B8_HUMAN	4930000	4540000	4470000	6300000	4320000	4820000	1	0.92	0.91	1.28	0.88	0.98	Immunoglobulin heavy variable 1/OR15-9 (non-functional) (Fragment) OS=Homo sapiens OX=9606 GN=IGHV1OR15-9 PE=1 SV=1
sp|P55107|GDF10_HUMAN	7370000	13700000	10100000	13600000	11300000	12600000	1	1.85	1.37	1.85	1.53	1.71	Growth/differentiation factor 10 OS=Homo sapiens OX=9606 GN=GDF10 PE=2 SV=1
F5H5I5|F5H5I5_HUMAN	127000000	49100000	131000000	106000000	184000000	182000000	1	0.39	1.03	0.83	1.44	1.43	ATP-binding cassette sub-family B member 9 (Fragment) OS=Homo sapiens OX=9606 GN=ABCB9 PE=4 SV=1
F5H0G0|F5H0G0_HUMAN	127000000	49100000	131000000	106000000	184000000	182000000	1	0.39	1.03	0.83	1.44	1.43	ATP-binding cassette sub-family B member 9 OS=Homo sapiens OX=9606 GN=ABCB9 PE=1 SV=1
sp|Q9NP78|ABCB9_HUMAN	127000000	49100000	131000000	106000000	184000000	182000000	1	0.39	1.03	0.83	1.44	1.43	ABC-type oligopeptide transporter ABCB9 OS=Homo sapiens OX=9606 GN=ABCB9 PE=1 SV=1
Q6P2Q0|Q6P2Q0_HUMAN	127000000	49100000	131000000	106000000	184000000	182000000	1	0.39	1.03	0.83	1.44	1.43	ABCB9 protein OS=Homo sapiens OX=9606 GN=ABCB9 PE=1 SV=1
E9PAL5|E9PAL5_HUMAN	4790000	23400000	5950000	7670000	139000000	14400000	1	4.88	1.24	1.6	29.01	3.01	Collagen alpha-5(VI) chain OS=Homo sapiens OX=9606 GN=COL6A5 PE=1 SV=3
sp|A8TX70|CO6A5_HUMAN	4790000	23400000	5950000	7670000	139000000	14400000	1	4.88	1.24	1.6	29.01	3.01	Collagen alpha-5(VI) chain OS=Homo sapiens OX=9606 GN=COL6A5 PE=1 SV=1
sp|P48643|TCPE_HUMAN	1180000	1310000	1340000	1220000	2370000	2010000	1	1.11	1.14	1.04	2.01	1.7	T-complex protein 1 subunit epsilon OS=Homo sapiens OX=9606 GN=CCT5 PE=1 SV=1
sp|Q5SSJ5|HP1B3_HUMAN	1880000	1070000	1930000	1120000	158000	162000	1	0.57	1.03	0.6	0.08	0.09	Heterochromatin protein 1-binding protein 3 OS=Homo sapiens OX=9606 GN=HP1BP3 PE=1 SV=1
B0QZK8|B0QZK8_HUMAN	1880000	1070000	1930000	1120000	158000	162000	1	0.57	1.03	0.6	0.08	0.09	Heterochromatin protein 1-binding protein 3 (Fragment) OS=Homo sapiens OX=9606 GN=HP1BP3 PE=1 SV=1
sp|P07602|SAP_HUMAN	1070000	1090000	727000	667000	1150000	702000	1	1.02	0.68	0.62	1.08	0.66	Prosaposin OS=Homo sapiens OX=9606 GN=PSAP PE=1 SV=2
C9JIZ6|C9JIZ6_HUMAN	1070000	1090000	727000	667000	1150000	702000	1	1.02	0.68	0.62	1.08	0.66	Prosaposin OS=Homo sapiens OX=9606 GN=PSAP PE=1 SV=2
Q5BJH1|Q5BJH1_HUMAN	1070000	1090000	727000	667000	1150000	702000	1	1.02	0.68	0.62	1.08	0.66	PSAP protein OS=Homo sapiens OX=9606 GN=PSAP PE=1 SV=1
sp|P42704|LPPRC_HUMAN	10200000	11600000	11600000	11900000	15200000	15100000	1	1.14	1.14	1.17	1.5	1.48	Leucine-rich PPR motif-containing protein mitochondrial OS=Homo sapiens OX=9606 GN=LRPPRC PE=1 SV=3
sp|Q9BVN2|RUSC1_HUMAN	13000000	22800000	15800000	23800000	23200000	23000000	1	1.76	1.22	1.84	1.79	1.77	RUN and SH3 domain-containing protein 1 OS=Homo sapiens OX=9606 GN=RUSC1 PE=1 SV=3
I3L1L3|I3L1L3_HUMAN	419000	1690000	2530000	803000	927000	1120000	1	4.04	6.04	1.92	2.21	2.67	Myb-binding protein 1A (Fragment) OS=Homo sapiens OX=9606 GN=MYBBP1A PE=1 SV=1
sp|Q9BQG0|MBB1A_HUMAN	419000	1690000	2530000	803000	927000	1120000	1	4.04	6.04	1.92	2.21	2.67	Myb-binding protein 1A OS=Homo sapiens OX=9606 GN=MYBBP1A PE=1 SV=2
sp|A0A0C4DH39|HV158_HUMAN	2340000	2130000	2000000	1860000	1290000	1920000	1	0.91	0.85	0.8	0.55	0.82	Immunoglobulin heavy variable 1-58 OS=Homo sapiens OX=9606 GN=IGHV1-58 PE=3 SV=1
sp|Q8NHH9|ATLA2_HUMAN	191000	1390000	479000	221000	321000	428000	1	7.26	2.51	1.16	1.68	2.24	Atlastin-2 OS=Homo sapiens OX=9606 GN=ATL2 PE=1 SV=2
C9JQQ5|C9JQQ5_HUMAN	191000	1390000	479000	221000	321000	428000	1	7.26	2.51	1.16	1.68	2.24	Atlastin-2 (Fragment) OS=Homo sapiens OX=9606 GN=ATL2 PE=1 SV=1
H0YLW8|H0YLW8_HUMAN	198000	308000	269000	266000	416000	261000	1	1.55	1.36	1.34	2.09	1.32	Proline-serine-threonine phosphatase-interacting protein 1 (Fragment) OS=Homo sapiens OX=9606 GN=PSTPIP1 PE=1 SV=8
J3KPG6|J3KPG6_HUMAN	198000	308000	269000	266000	416000	261000	1	1.55	1.36	1.34	2.09	1.32	Proline-serine-threonine phosphatase-interacting protein 1 OS=Homo sapiens OX=9606 GN=PSTPIP1 PE=1 SV=1
sp|O43586|PPIP1_HUMAN	198000	308000	269000	266000	416000	261000	1	1.55	1.36	1.34	2.09	1.32	Proline-serine-threonine phosphatase-interacting protein 1 OS=Homo sapiens OX=9606 GN=PSTPIP1 PE=1 SV=1
H0YKY3|H0YKY3_HUMAN	198000	308000	269000	266000	416000	261000	1	1.55	1.36	1.34	2.09	1.32	Proline-serine-threonine phosphatase-interacting protein 1 OS=Homo sapiens OX=9606 GN=PSTPIP1 PE=1 SV=1
H0YLI2|H0YLI2_HUMAN	198000	308000	269000	266000	416000	261000	1	1.55	1.36	1.34	2.09	1.32	Proline-serine-threonine phosphatase-interacting protein 1 (Fragment) OS=Homo sapiens OX=9606 GN=PSTPIP1 PE=1 SV=1
H0YNS1|H0YNS1_HUMAN	198000	308000	269000	266000	416000	261000	1	1.55	1.36	1.34	2.09	1.32	Proline-serine-threonine phosphatase-interacting protein 1 OS=Homo sapiens OX=9606 GN=PSTPIP1 PE=1 SV=1
B4E1Z9|B4E1Z9_HUMAN	198000	308000	269000	266000	416000	261000	1	1.55	1.36	1.34	2.09	1.32	Proline-serine-threonine phosphatase-interacting protein 1 OS=Homo sapiens OX=9606 GN=PSTPIP1 PE=1 SV=1
H0YLM9|H0YLM9_HUMAN	198000	308000	269000	266000	416000	261000	1	1.55	1.36	1.34	2.09	1.32	Proline-serine-threonine phosphatase-interacting protein 1 (Fragment) OS=Homo sapiens OX=9606 GN=PSTPIP1 PE=1 SV=1
sp|Q15293|RCN1_HUMAN	4660000	5380000	5360000	4280000	6040000	4030000	1	1.15	1.15	0.92	1.3	0.87	Reticulocalbin-1 OS=Homo sapiens OX=9606 GN=RCN1 PE=1 SV=1
sp|Q9UFH2|DYH17_HUMAN	573000	1890000	2700000	1480000	614000	1120000	1	3.3	4.72	2.58	1.07	1.96	Dynein axonemal heavy chain 17 OS=Homo sapiens OX=9606 GN=DNAH17 PE=1 SV=3
sp|P11678|PERE_HUMAN	519000	525000	548000	570000	666000	999000	1	1.01	1.06	1.1	1.28	1.92	Eosinophil peroxidase OS=Homo sapiens OX=9606 GN=EPX PE=1 SV=2
sp|P40197|GPV_HUMAN	734000	795000	742000	625000	727000	750000	1	1.08	1.01	0.85	0.99	1.02	Platelet glycoprotein V OS=Homo sapiens OX=9606 GN=GP5 PE=1 SV=1
sp|Q9P2M4|TBC14_HUMAN	613000	876000	696000	803000	698000	1030000	1	1.43	1.13	1.31	1.14	1.69	TBC1 domain family member 14 OS=Homo sapiens OX=9606 GN=TBC1D14 PE=1 SV=3
sp|Q2KHT3|CL16A_HUMAN	32900000	34800000	41700000	41100000	57600000	62300000	1	1.06	1.27	1.25	1.75	1.89	Protein CLEC16A OS=Homo sapiens OX=9606 GN=CLEC16A PE=1 SV=2
sp|P06858|LIPL_HUMAN	356000	333000	332000	254000	351000	349000	1	0.93	0.93	0.71	0.99	0.98	Lipoprotein lipase OS=Homo sapiens OX=9606 GN=LPL PE=1 SV=1
E7EW14|E7EW14_HUMAN	356000	333000	332000	254000	351000	349000	1	0.93	0.93	0.71	0.99	0.98	Phospholipase A1 (Fragment) OS=Homo sapiens OX=9606 GN=LPL PE=1 SV=1
sp|Q6ZN30|BNC2_HUMAN	18200000	17700000	20000000	22200000	20800000	19000000	1	0.97	1.1	1.22	1.14	1.05	Zinc finger protein basonuclin-2 OS=Homo sapiens OX=9606 GN=BNC2 PE=1 SV=1
B1APH0|B1APH0_HUMAN	18200000	17700000	20000000	22200000	20800000	19000000	1	0.97	1.1	1.22	1.14	1.05	Zinc finger protein basonuclin-2 OS=Homo sapiens OX=9606 GN=BNC2 PE=1 SV=1
sp|P12829|MYL4_HUMAN	146000	167000	120000	188000	277000	168000	1	1.14	0.82	1.28	1.9	1.15	Myosin light chain 4 OS=Homo sapiens OX=9606 GN=MYL4 PE=1 SV=3
sp|Q9BZC7|ABCA2_HUMAN	330000	547000	474000	637000	606000	406000	1	1.66	1.44	1.93	1.83	1.23	ATP-binding cassette sub-family A member 2 OS=Homo sapiens OX=9606 GN=ABCA2 PE=1 SV=4
J3QSS3|J3QSS3_HUMAN	330000	547000	474000	637000	606000	406000	1	1.66	1.44	1.93	1.83	1.23	ATP-binding cassette sub-family A member 2 OS=Homo sapiens OX=9606 GN=ABCA2 PE=1 SV=2
A0A087WXK5|A0A087WXK5_HUMAN	330000	547000	474000	637000	606000	406000	1	1.66	1.44	1.93	1.83	1.23	ATP-binding cassette sub-family A member 2 OS=Homo sapiens OX=9606 GN=ABCA2 PE=1 SV=1
E9PGB2|E9PGB2_HUMAN	330000	547000	474000	637000	606000	406000	1	1.66	1.44	1.93	1.83	1.23	ATP-binding cassette sub-family A member 2 OS=Homo sapiens OX=9606 GN=ABCA2 PE=1 SV=2
A0A2R8Y478|A0A2R8Y478_HUMAN	1040000	1260000	1160000	1190000	30100	0	1	1.22	1.12	1.14	0.03	0	Tetraspanin OS=Homo sapiens OX=9606 GN=CD9 PE=1 SV=1
A6NNI4|A6NNI4_HUMAN	1040000	1260000	1160000	1190000	30100	0	1	1.22	1.12	1.14	0.03	0	Tetraspanin OS=Homo sapiens OX=9606 GN=CD9 PE=1 SV=1
A0A7I2V3T0|A0A7I2V3T0_HUMAN	1040000	1260000	1160000	1190000	30100	0	1	1.22	1.12	1.14	0.03	0	Tetraspanin OS=Homo sapiens OX=9606 GN=CD9 PE=1 SV=1
A0A7I2V3T7|A0A7I2V3T7_HUMAN	1040000	1260000	1160000	1190000	30100	0	1	1.22	1.12	1.14	0.03	0	Tetraspanin OS=Homo sapiens OX=9606 GN=CD9 PE=1 SV=1
sp|P21926|CD9_HUMAN	1040000	1260000	1160000	1190000	30100	0	1	1.22	1.12	1.14	0.03	0	CD9 antigen OS=Homo sapiens OX=9606 GN=CD9 PE=1 SV=4
G8JLH6|G8JLH6_HUMAN	1040000	1260000	1160000	1190000	30100	0	1	1.22	1.12	1.14	0.03	0	Tetraspanin OS=Homo sapiens OX=9606 GN=CD9 PE=1 SV=2
A0A087WU13|A0A087WU13_HUMAN	1040000	1260000	1160000	1190000	30100	0	1	1.22	1.12	1.14	0.03	0	Tetraspanin OS=Homo sapiens OX=9606 GN=CD9 PE=1 SV=2
F5GXT1|F5GXT1_HUMAN	1040000	1260000	1160000	1190000	30100	0	1	1.22	1.12	1.14	0.03	0	Tetraspanin OS=Homo sapiens OX=9606 GN=CD9 PE=1 SV=10
sp|Q13255|GRM1_HUMAN	293000	784000	567000	877000	379000	490000	1	2.68	1.94	3	1.29	1.68	Metabotropic glutamate receptor 1 OS=Homo sapiens OX=9606 GN=GRM1 PE=1 SV=3
sp|Q00610|CLH1_HUMAN	369000	456000	267000	323000	452000	322000	1	1.24	0.72	0.88	1.22	0.87	Clathrin heavy chain 1 OS=Homo sapiens OX=9606 GN=CLTC PE=1 SV=5
A0A087WVQ6|A0A087WVQ6_HUMAN	369000	456000	267000	323000	452000	322000	1	1.24	0.72	0.88	1.22	0.87	Clathrin heavy chain OS=Homo sapiens OX=9606 GN=CLTC PE=1 SV=1
sp|Q8NCX0|CC150_HUMAN	356000	634000	541000	690000	768000	823000	1	1.78	1.52	1.94	2.16	2.31	Coiled-coil domain-containing protein 150 OS=Homo sapiens OX=9606 GN=CCDC150 PE=1 SV=2
B8ZZI4|B8ZZI4_HUMAN	356000	634000	541000	690000	768000	823000	1	1.78	1.52	1.94	2.16	2.31	Coiled-coil domain-containing protein 150 OS=Homo sapiens OX=9606 GN=CCDC150 PE=1 SV=1
A0A6Q8PHC3|A0A6Q8PHC3_HUMAN	3620000	3000000	4160000	2590000	888000	1370000	1	0.83	1.15	0.71	0.25	0.38	Structural maintenance of chromosomes protein 1A OS=Homo sapiens OX=9606 GN=SMC1A PE=1 SV=1
G8JLG1|G8JLG1_HUMAN	3620000	3000000	4160000	2590000	888000	1370000	1	0.83	1.15	0.71	0.25	0.38	Structural maintenance of chromosomes protein OS=Homo sapiens OX=9606 GN=SMC1A PE=1 SV=2
sp|Q14683|SMC1A_HUMAN	3620000	3000000	4160000	2590000	888000	1370000	1	0.83	1.15	0.71	0.25	0.38	Structural maintenance of chromosomes protein 1A OS=Homo sapiens OX=9606 GN=SMC1A PE=1 SV=2
sp|Q9UHB6|LIMA1_HUMAN	647000	896000	691000	727000	541000	701000	1	1.38	1.07	1.12	0.84	1.08	LIM domain and actin-binding protein 1 OS=Homo sapiens OX=9606 GN=LIMA1 PE=1 SV=1
F8VQE1|F8VQE1_HUMAN	647000	896000	691000	727000	541000	701000	1	1.38	1.07	1.12	0.84	1.08	LIM domain and actin-binding protein 1 OS=Homo sapiens OX=9606 GN=LIMA1 PE=1 SV=1
F8VS07|F8VS07_HUMAN	647000	896000	691000	727000	541000	701000	1	1.38	1.07	1.12	0.84	1.08	LIM domain and actin-binding protein 1 OS=Homo sapiens OX=9606 GN=LIMA1 PE=1 SV=1
F8VRN8|F8VRN8_HUMAN	647000	896000	691000	727000	541000	701000	1	1.38	1.07	1.12	0.84	1.08	LIM domain and actin-binding protein 1 OS=Homo sapiens OX=9606 GN=LIMA1 PE=1 SV=1
A0A7P0TAA2|A0A7P0TAA2_HUMAN	1980000	2100000	1560000	1440000	1680000	2540000	1	1.06	0.79	0.73	0.85	1.29	A-kinase anchor protein 9 OS=Homo sapiens OX=9606 GN=AKAP9 PE=4 SV=1
A0A7P0T939|A0A7P0T939_HUMAN	1980000	2100000	1560000	1440000	1680000	2540000	1	1.06	0.79	0.73	0.85	1.29	A-kinase anchor protein 9 OS=Homo sapiens OX=9606 GN=AKAP9 PE=4 SV=1
A0A7P0TAD6|A0A7P0TAD6_HUMAN	1980000	2100000	1560000	1440000	1680000	2540000	1	1.06	0.79	0.73	0.85	1.29	A-kinase anchor protein 9 OS=Homo sapiens OX=9606 GN=AKAP9 PE=4 SV=1
A0A7P0TAX3|A0A7P0TAX3_HUMAN	1980000	2100000	1560000	1440000	1680000	2540000	1	1.06	0.79	0.73	0.85	1.29	A-kinase anchor protein 9 OS=Homo sapiens OX=9606 GN=AKAP9 PE=4 SV=1
A0A7P0Z4Q5|A0A7P0Z4Q5_HUMAN	1980000	2100000	1560000	1440000	1680000	2540000	1	1.06	0.79	0.73	0.85	1.29	A-kinase anchor protein 9 OS=Homo sapiens OX=9606 GN=AKAP9 PE=4 SV=1
A0A7P0T8N5|A0A7P0T8N5_HUMAN	1980000	2100000	1560000	1440000	1680000	2540000	1	1.06	0.79	0.73	0.85	1.29	A-kinase anchor protein 9 OS=Homo sapiens OX=9606 GN=AKAP9 PE=4 SV=1
A0A7P0T9A9|A0A7P0T9A9_HUMAN	1980000	2100000	1560000	1440000	1680000	2540000	1	1.06	0.79	0.73	0.85	1.29	A-kinase anchor protein 9 OS=Homo sapiens OX=9606 GN=AKAP9 PE=4 SV=1
A0A7P0T928|A0A7P0T928_HUMAN	1980000	2100000	1560000	1440000	1680000	2540000	1	1.06	0.79	0.73	0.85	1.29	A-kinase anchor protein 9 OS=Homo sapiens OX=9606 GN=AKAP9 PE=4 SV=1
sp|Q99996|AKAP9_HUMAN	1980000	2100000	1560000	1440000	1680000	2540000	1	1.06	0.79	0.73	0.85	1.29	A-kinase anchor protein 9 OS=Homo sapiens OX=9606 GN=AKAP9 PE=1 SV=4
A0A7P0Z4N5|A0A7P0Z4N5_HUMAN	1980000	2100000	1560000	1440000	1680000	2540000	1	1.06	0.79	0.73	0.85	1.29	A-kinase anchor protein 9 OS=Homo sapiens OX=9606 GN=AKAP9 PE=4 SV=1
A0A7P0TBI4|A0A7P0TBI4_HUMAN	1980000	2100000	1560000	1440000	1680000	2540000	1	1.06	0.79	0.73	0.85	1.29	A-kinase anchor protein 9 OS=Homo sapiens OX=9606 GN=AKAP9 PE=4 SV=1
A0A7P0TBH8|A0A7P0TBH8_HUMAN	1980000	2100000	1560000	1440000	1680000	2540000	1	1.06	0.79	0.73	0.85	1.29	A-kinase anchor protein 9 OS=Homo sapiens OX=9606 GN=AKAP9 PE=4 SV=1
A0A0A0MRF6|A0A0A0MRF6_HUMAN	1980000	2100000	1560000	1440000	1680000	2540000	1	1.06	0.79	0.73	0.85	1.29	A-kinase anchor protein 9 OS=Homo sapiens OX=9606 GN=AKAP9 PE=1 SV=2
sp|P30050|RL12_HUMAN	2590000	1720000	3370000	1870000	508000	488000	1	0.66	1.3	0.72	0.2	0.19	60S ribosomal protein L12 OS=Homo sapiens OX=9606 GN=RPL12 PE=1 SV=1
A0A087WY82|A0A087WY82_HUMAN	572000	686000	811000	749000	1030000	915000	1	1.2	1.42	1.31	1.8	1.6	Junctional adhesion molecule 1 OS=Homo sapiens OX=9606 GN=F11R PE=1 SV=1
sp|Q9Y624|JAM1_HUMAN	572000	686000	811000	749000	1030000	915000	1	1.2	1.42	1.31	1.8	1.6	Junctional adhesion molecule A OS=Homo sapiens OX=9606 GN=F11R PE=1 SV=1
sp|Q15811|ITSN1_HUMAN	1600000	1970000	1850000	1840000	2400000	2620000	1	1.24	1.16	1.15	1.5	1.64	Intersectin-1 OS=Homo sapiens OX=9606 GN=ITSN1 PE=1 SV=3
F8W7U0|F8W7U0_HUMAN	1600000	1970000	1850000	1840000	2400000	2620000	1	1.24	1.16	1.15	1.5	1.64	Intersectin-1 OS=Homo sapiens OX=9606 GN=ITSN1 PE=1 SV=1
A8CTZ0|A8CTZ0_HUMAN	1600000	1970000	1850000	1840000	2400000	2620000	1	1.24	1.16	1.15	1.5	1.64	Intersectin 1 short form variant 13 OS=Homo sapiens OX=9606 GN=ITSN1 PE=1 SV=1
A0A7I2V3H7|A0A7I2V3H7_HUMAN	1310000	968000	1460000	686000	213000	221000	1	0.74	1.11	0.52	0.16	0.17	GRB10-interacting GYF protein 2 OS=Homo sapiens OX=9606 GN=GIGYF2 PE=1 SV=1
A0A7I2V361|A0A7I2V361_HUMAN	1310000	968000	1460000	686000	213000	221000	1	0.74	1.11	0.52	0.16	0.17	GRB10-interacting GYF protein 2 OS=Homo sapiens OX=9606 GN=GIGYF2 PE=1 SV=1
A0A7I2V3H0|A0A7I2V3H0_HUMAN	1310000	968000	1460000	686000	213000	221000	1	0.74	1.11	0.52	0.16	0.17	GRB10-interacting GYF protein 2 OS=Homo sapiens OX=9606 GN=GIGYF2 PE=1 SV=1
A0A7I2V516|A0A7I2V516_HUMAN	1310000	968000	1460000	686000	213000	221000	1	0.74	1.11	0.52	0.16	0.17	GRB10-interacting GYF protein 2 OS=Homo sapiens OX=9606 GN=GIGYF2 PE=1 SV=1
sp|Q6Y7W6|GGYF2_HUMAN	1310000	968000	1460000	686000	213000	221000	1	0.74	1.11	0.52	0.16	0.17	GRB10-interacting GYF protein 2 OS=Homo sapiens OX=9606 GN=GIGYF2 PE=1 SV=1
I1E4Y6|I1E4Y6_HUMAN	1310000	968000	1460000	686000	213000	221000	1	0.74	1.11	0.52	0.16	0.17	GRB10-interacting GYF protein 2 OS=Homo sapiens OX=9606 GN=GIGYF2 PE=1 SV=1
sp|Q8NFQ6|BPIFC_HUMAN	4860000	7850000	5970000	7020000	7660000	8960000	1	1.62	1.23	1.44	1.58	1.85	BPI fold-containing family C protein OS=Homo sapiens OX=9606 GN=BPIFC PE=2 SV=1
sp|Q7KZ85|SPT6H_HUMAN	823000	808000	838000	742000	1050000	1140000	1	0.98	1.02	0.9	1.28	1.39	Transcription elongation factor SPT6 OS=Homo sapiens OX=9606 GN=SUPT6H PE=1 SV=2
sp|Q9NZN4|EHD2_HUMAN	1070000	703000	1020000	756000	97300	132000	1	0.66	0.95	0.71	0.09	0.12	EH domain-containing protein 2 OS=Homo sapiens OX=9606 GN=EHD2 PE=1 SV=2
sp|Q68DQ2|CRBG3_HUMAN	398000	398000	454000	402000	666000	614000	1	1	1.14	1.01	1.67	1.54	Very large A-kinase anchor protein OS=Homo sapiens OX=9606 GN=CRYBG3 PE=1 SV=3
sp|Q13939|CALI_HUMAN	1400000	1280000	1810000	1190000	1380000	1400000	1	0.91	1.29	0.85	0.98	1	Calicin OS=Homo sapiens OX=9606 GN=CCIN PE=1 SV=3
sp|Q9NZQ7|PD1L1_HUMAN	809000	530000	1060000	483000	352000	251000	1	0.66	1.31	0.6	0.43	0.31	Programmed cell death 1 ligand 1 OS=Homo sapiens OX=9606 GN=CD274 PE=1 SV=1
sp|Q12789|TF3C1_HUMAN	65000	69700	26800	27900	60400	207000	1	1.07	0.41	0.43	0.93	3.19	General transcription factor 3C polypeptide 1 OS=Homo sapiens OX=9606 GN=GTF3C1 PE=1 SV=4
sp|P0CG23|ZN853_HUMAN	381000	437000	274000	353000	251000	368000	1	1.15	0.72	0.93	0.66	0.97	Zinc finger protein 853 OS=Homo sapiens OX=9606 GN=ZNF853 PE=2 SV=1
sp|Q4G0X9|CCD40_HUMAN	5210000	5340000	3950000	7170000	4120000	4350000	1	1.02	0.76	1.38	0.79	0.83	Coiled-coil domain-containing protein 40 OS=Homo sapiens OX=9606 GN=CCDC40 PE=1 SV=2
sp|O75970|MPDZ_HUMAN	405000	767000	332000	435000	546000	396000	1	1.9	0.82	1.08	1.35	0.98	Multiple PDZ domain protein OS=Homo sapiens OX=9606 GN=MPDZ PE=1 SV=2
F5H1U9|F5H1U9_HUMAN	405000	767000	332000	435000	546000	396000	1	1.9	0.82	1.08	1.35	0.98	Multiple PDZ domain protein OS=Homo sapiens OX=9606 GN=MPDZ PE=1 SV=1
sp|Q2TAC6|KIF19_HUMAN	10800000	3110000	9770000	3090000	7550000	4710000	1	0.29	0.9	0.29	0.7	0.43	Kinesin-like protein KIF19 OS=Homo sapiens OX=9606 GN=KIF19 PE=2 SV=2
N0DVX5|N0DVX5_HUMAN	292000	863000	439000	395000	617000	578000	1	2.95	1.5	1.35	2.11	1.98	DBF4-type zinc finger-containing protein 2 OS=Homo sapiens OX=9606 GN=ZDBF2 PE=1 SV=1
sp|Q9HCK1|ZDBF2_HUMAN	292000	863000	439000	395000	617000	578000	1	2.95	1.5	1.35	2.11	1.98	DBF4-type zinc finger-containing protein 2 OS=Homo sapiens OX=9606 GN=ZDBF2 PE=1 SV=3
A0A3B3ITZ5|A0A3B3ITZ5_HUMAN	292000	863000	439000	395000	617000	578000	1	2.95	1.5	1.35	2.11	1.98	DBF4-type zinc finger-containing protein 2 (Fragment) OS=Homo sapiens OX=9606 GN=ZDBF2 PE=1 SV=1
A0A3B3IRN6|A0A3B3IRN6_HUMAN	292000	863000	439000	395000	617000	578000	1	2.95	1.5	1.35	2.11	1.98	DBF4-type zinc finger-containing protein 2 (Fragment) OS=Homo sapiens OX=9606 GN=ZDBF2 PE=1 SV=1
A8MX12|A8MX12_HUMAN	667000	624000	560000	873000	761000	802000	1	0.94	0.84	1.31	1.14	1.2	Myomesin-1 OS=Homo sapiens OX=9606 GN=MYOM1 PE=1 SV=3
G3V5V7|G3V5V7_HUMAN	4380000	3290000	4050000	4070000	922000	817000	1	0.75	0.93	0.93	0.21	0.19	Heterogeneous nuclear ribonucleoproteins C1/C2 (Fragment) OS=Homo sapiens OX=9606 GN=HNRNPC PE=1 SV=1
G3V2D6|G3V2D6_HUMAN	4380000	3290000	4050000	4070000	922000	817000	1	0.75	0.93	0.93	0.21	0.19	Heterogeneous nuclear ribonucleoproteins C1/C2 (Fragment) OS=Homo sapiens OX=9606 GN=HNRNPC PE=1 SV=1
G3V4W0|G3V4W0_HUMAN	4380000	3290000	4050000	4070000	922000	817000	1	0.75	0.93	0.93	0.21	0.19	Heterogeneous nuclear ribonucleoproteins C1/C2 (Fragment) OS=Homo sapiens OX=9606 GN=HNRNPC PE=1 SV=1
B4DY08|B4DY08_HUMAN	4380000	3290000	4050000	4070000	922000	817000	1	0.75	0.93	0.93	0.21	0.19	Heterogeneous nuclear ribonucleoproteins C1/C2 OS=Homo sapiens OX=9606 GN=HNRNPC PE=1 SV=1
B2R5W2|B2R5W2_HUMAN	4380000	3290000	4050000	4070000	922000	817000	1	0.75	0.93	0.93	0.21	0.19	Heterogeneous nuclear ribonucleoproteins C1/C2 OS=Homo sapiens OX=9606 GN=HNRNPC PE=1 SV=1
G3V4C1|G3V4C1_HUMAN	4380000	3290000	4050000	4070000	922000	817000	1	0.75	0.93	0.93	0.21	0.19	Heterogeneous nuclear ribonucleoproteins C1/C2 OS=Homo sapiens OX=9606 GN=HNRNPC PE=1 SV=1
G3V2Q1|G3V2Q1_HUMAN	4380000	3290000	4050000	4070000	922000	817000	1	0.75	0.93	0.93	0.21	0.19	Heterogeneous nuclear ribonucleoproteins C1/C2 OS=Homo sapiens OX=9606 GN=HNRNPC PE=1 SV=1
sp|P07910|HNRPC_HUMAN	4380000	3290000	4050000	4070000	922000	817000	1	0.75	0.93	0.93	0.21	0.19	Heterogeneous nuclear ribonucleoproteins C1/C2 OS=Homo sapiens OX=9606 GN=HNRNPC PE=1 SV=4
sp|Q86UP2|KTN1_HUMAN	14200000	13000000	14600000	18300000	10900000	15600000	1	0.92	1.02	1.29	0.76	1.1	Kinectin OS=Homo sapiens OX=9606 GN=KTN1 PE=1 SV=1
sp|Q6VUC0|AP2E_HUMAN	2530000	3400000	2930000	3270000	2800000	5410000	1	1.35	1.16	1.29	1.11	2.14	Transcription factor AP-2-epsilon OS=Homo sapiens OX=9606 GN=TFAP2E PE=2 SV=1
A0A494C1D7|A0A494C1D7_HUMAN	462000	839000	448000	553000	3420000	817000	1	1.81	0.97	1.2	7.4	1.77	Dystonin (Fragment) OS=Homo sapiens OX=9606 GN=DST PE=1 SV=1
E9PHM6|E9PHM6_HUMAN	462000	839000	448000	553000	3420000	817000	1	1.81	0.97	1.2	7.4	1.77	Dystonin OS=Homo sapiens OX=9606 GN=DST PE=1 SV=3
F6QMI7|F6QMI7_HUMAN	462000	839000	448000	553000	3420000	817000	1	1.81	0.97	1.2	7.4	1.77	Dystonin OS=Homo sapiens OX=9606 GN=DST PE=1 SV=2
E7ETB9|E7ETB9_HUMAN	462000	839000	448000	553000	3420000	817000	1	1.81	0.97	1.2	7.4	1.77	Dystonin (Fragment) OS=Homo sapiens OX=9606 GN=DST PE=1 SV=1
F8W9J4|F8W9J4_HUMAN	462000	839000	448000	553000	3420000	817000	1	1.81	0.97	1.2	7.4	1.77	Dystonin OS=Homo sapiens OX=9606 GN=DST PE=1 SV=1
sp|Q03001|DYST_HUMAN	462000	839000	448000	553000	3420000	817000	1	1.81	0.97	1.2	7.4	1.77	Dystonin OS=Homo sapiens OX=9606 GN=DST PE=1 SV=4
A0A7P0T890|A0A7P0T890_HUMAN	462000	839000	448000	553000	3420000	817000	1	1.81	0.97	1.2	7.4	1.77	Dystonin OS=Homo sapiens OX=9606 GN=DST PE=4 SV=1
sp|Q8NEP3|DAAF1_HUMAN	1080000	480000	1100000	910000	683000	837000	1	0.44	1.02	0.84	0.63	0.77	Dynein axonemal assembly factor 1 OS=Homo sapiens OX=9606 GN=DNAAF1 PE=2 SV=5
sp|Q96QF7|ACRC_HUMAN	277000	383000	273000	332000	390000	319000	1	1.38	0.99	1.2	1.41	1.15	Acidic repeat-containing protein OS=Homo sapiens OX=9606 GN=GCNA PE=1 SV=1
sp|O75691|UTP20_HUMAN	1430000	2690000	1980000	2960000	2500000	4090000	1	1.88	1.38	2.07	1.75	2.86	Small subunit processome component 20 homolog OS=Homo sapiens OX=9606 GN=UTP20 PE=1 SV=3
sp|O15054|KDM6B_HUMAN	561000	479000	650000	513000	392000	408000	1	0.85	1.16	0.92	0.7	0.73	Lysine-specific demethylase 6B OS=Homo sapiens OX=9606 GN=KDM6B PE=1 SV=4
sp|Q96JS3|PGBD1_HUMAN	247000	303000	236000	458000	296000	474000	1	1.23	0.95	1.85	1.2	1.92	PiggyBac transposable element-derived protein 1 OS=Homo sapiens OX=9606 GN=PGBD1 PE=1 SV=1
sp|Q99878|H2A1J_HUMAN	2560000	2930000	5300000	1590000	792000	824000	1	1.14	2.07	0.62	0.31	0.32	Histone H2A type 1-J OS=Homo sapiens OX=9606 GN=H2AC14 PE=1 SV=3
sp|Q96KK5|H2A1H_HUMAN	2560000	2930000	5300000	1590000	792000	824000	1	1.14	2.07	0.62	0.31	0.32	Histone H2A type 1-H OS=Homo sapiens OX=9606 GN=H2AC12 PE=1 SV=3
sp|Q9BTM1|H2AJ_HUMAN	2560000	2930000	5300000	1590000	792000	824000	1	1.14	2.07	0.62	0.31	0.32	Histone H2A.J OS=Homo sapiens OX=9606 GN=H2AJ PE=1 SV=1
sp|Q16777|H2A2C_HUMAN	2560000	2930000	5300000	1590000	792000	824000	1	1.14	2.07	0.62	0.31	0.32	Histone H2A type 2-C OS=Homo sapiens OX=9606 GN=H2AC20 PE=1 SV=4
sp|Q8IUE6|H2A2B_HUMAN	2560000	2930000	5300000	1590000	792000	824000	1	1.14	2.07	0.62	0.31	0.32	Histone H2A type 2-B OS=Homo sapiens OX=9606 GN=H2AC21 PE=1 SV=3
sp|P0C0S8|H2A1_HUMAN	2560000	2930000	5300000	1590000	792000	824000	1	1.14	2.07	0.62	0.31	0.32	Histone H2A type 1 OS=Homo sapiens OX=9606 GN=H2AC17 PE=1 SV=2
sp|Q6FI13|H2A2A_HUMAN	2560000	2930000	5300000	1590000	792000	824000	1	1.14	2.07	0.62	0.31	0.32	Histone H2A type 2-A OS=Homo sapiens OX=9606 GN=H2AC19 PE=1 SV=3
sp|Q93077|H2A1C_HUMAN	2560000	2930000	5300000	1590000	792000	824000	1	1.14	2.07	0.62	0.31	0.32	Histone H2A type 1-C OS=Homo sapiens OX=9606 GN=H2AC6 PE=1 SV=3
sp|Q96QV6|H2A1A_HUMAN	2560000	2930000	5300000	1590000	792000	824000	1	1.14	2.07	0.62	0.31	0.32	Histone H2A type 1-A OS=Homo sapiens OX=9606 GN=H2AC1 PE=1 SV=3
A0A7P0T7G7|A0A7P0T7G7_HUMAN	25200	37300	34900	23900	32500	15600	1	1.48	1.38	0.95	1.29	0.62	Glutamine-rich protein 2 OS=Homo sapiens OX=9606 GN=QRICH2 PE=4 SV=1
sp|Q9H0J4|QRIC2_HUMAN	25200	37300	34900	23900	32500	15600	1	1.48	1.38	0.95	1.29	0.62	Glutamine-rich protein 2 OS=Homo sapiens OX=9606 GN=QRICH2 PE=1 SV=1
A0A1B0GW36|A0A1B0GW36_HUMAN	25200	37300	34900	23900	32500	15600	1	1.48	1.38	0.95	1.29	0.62	Glutamine-rich protein 2 OS=Homo sapiens OX=9606 GN=QRICH2 PE=1 SV=1
E9PGT3|E9PGT3_HUMAN	662000	1240000	829000	500000	630000	564000	1	1.87	1.25	0.75	0.95	0.85	Ribosomal protein S6 kinase OS=Homo sapiens OX=9606 GN=RPS6KA1 PE=1 SV=1
A0A6Q8PGQ5|A0A6Q8PGQ5_HUMAN	235000	509000	401000	291000	632000	305000	1	2.16	1.7	1.24	2.68	1.3	Ligand-dependent corepressor OS=Homo sapiens OX=9606 GN=LCOR PE=4 SV=1
sp|Q99700|ATX2_HUMAN	1440000	544000	1450000	1520000	993000	1110000	1	0.38	1.01	1.06	0.69	0.77	Ataxin-2 OS=Homo sapiens OX=9606 GN=ATXN2 PE=1 SV=2
H0YH87|H0YH87_HUMAN	1440000	544000	1450000	1520000	993000	1110000	1	0.38	1.01	1.06	0.69	0.77	Ataxin-2 OS=Homo sapiens OX=9606 GN=ATXN2 PE=1 SV=2
A0A2R8Y7P6|A0A2R8Y7P6_HUMAN	1440000	544000	1450000	1520000	993000	1110000	1	0.38	1.01	1.06	0.69	0.77	Ataxin-2 OS=Homo sapiens OX=9606 GN=ATXN2 PE=1 SV=1
A0A2R8YDM9|A0A2R8YDM9_HUMAN	1440000	544000	1450000	1520000	993000	1110000	1	0.38	1.01	1.06	0.69	0.77	Ataxin-2 OS=Homo sapiens OX=9606 GN=ATXN2 PE=1 SV=1
F8VQP2|F8VQP2_HUMAN	1440000	544000	1450000	1520000	993000	1110000	1	0.38	1.01	1.06	0.69	0.77	Ataxin-2 OS=Homo sapiens OX=9606 GN=ATXN2 PE=1 SV=1
F8WB06|F8WB06_HUMAN	1440000	544000	1450000	1520000	993000	1110000	1	0.38	1.01	1.06	0.69	0.77	Ataxin-2 OS=Homo sapiens OX=9606 GN=ATXN2 PE=1 SV=3
V9GY86|V9GY86_HUMAN	1440000	544000	1450000	1520000	993000	1110000	1	0.38	1.01	1.06	0.69	0.77	Ataxin-2 OS=Homo sapiens OX=9606 GN=ATXN2 PE=1 SV=1
A0A5F9ZI57|A0A5F9ZI57_HUMAN	1440000	544000	1450000	1520000	993000	1110000	1	0.38	1.01	1.06	0.69	0.77	Ataxin-2 OS=Homo sapiens OX=9606 GN=ATXN2 PE=1 SV=1
A0A2R8Y7E6|A0A2R8Y7E6_HUMAN	1440000	544000	1450000	1520000	993000	1110000	1	0.38	1.01	1.06	0.69	0.77	Ataxin-2 OS=Homo sapiens OX=9606 GN=ATXN2 PE=1 SV=2
A0A2R8Y5A6|A0A2R8Y5A6_HUMAN	1440000	544000	1450000	1520000	993000	1110000	1	0.38	1.01	1.06	0.69	0.77	Ataxin-2 OS=Homo sapiens OX=9606 GN=ATXN2 PE=1 SV=1
A0A5F9ZHX3|A0A5F9ZHX3_HUMAN	1440000	544000	1450000	1520000	993000	1110000	1	0.38	1.01	1.06	0.69	0.77	Ataxin-2 OS=Homo sapiens OX=9606 GN=ATXN2 PE=1 SV=1
A0A5F9ZHW5|A0A5F9ZHW5_HUMAN	1440000	544000	1450000	1520000	993000	1110000	1	0.38	1.01	1.06	0.69	0.77	Ataxin-2 OS=Homo sapiens OX=9606 GN=ATXN2 PE=1 SV=1
A0A5F9ZHH4|A0A5F9ZHH4_HUMAN	1440000	544000	1450000	1520000	993000	1110000	1	0.38	1.01	1.06	0.69	0.77	Ataxin-2 OS=Homo sapiens OX=9606 GN=ATXN2 PE=1 SV=1
A0A5F9ZH85|A0A5F9ZH85_HUMAN	1440000	544000	1450000	1520000	993000	1110000	1	0.38	1.01	1.06	0.69	0.77	Ataxin-2 (Fragment) OS=Homo sapiens OX=9606 GN=ATXN2 PE=1 SV=1
sp|Q9P2K5|MYEF2_HUMAN	461000	563000	432000	444000	548000	517000	1	1.22	0.94	0.96	1.19	1.12	Myelin expression factor 2 OS=Homo sapiens OX=9606 GN=MYEF2 PE=1 SV=3
K7EIG1|K7EIG1_HUMAN	47500	71800	70200	115000	105000	40600	1	1.51	1.48	2.42	2.22	0.85	Clustered mitochondria protein homolog (Fragment) OS=Homo sapiens OX=9606 GN=CLUH PE=1 SV=2
E5RJE3|E5RJE3_HUMAN	1110000	985000	940000	1300000	253000	265000	1	0.88	0.84	1.17	0.23	0.24	RWD domain-containing protein 1 (Fragment) OS=Homo sapiens OX=9606 GN=RWDD1 PE=1 SV=1
E5RGQ3|E5RGQ3_HUMAN	1110000	985000	940000	1300000	253000	265000	1	0.88	0.84	1.17	0.23	0.24	RWD domain-containing protein 1 (Fragment) OS=Homo sapiens OX=9606 GN=RWDD1 PE=1 SV=1
sp|Q8WXE0|CSKI2_HUMAN	160000	237000	311000	450000	343000	802000	1	1.48	1.94	2.81	2.14	5.01	Caskin-2 OS=Homo sapiens OX=9606 GN=CASKIN2 PE=1 SV=2
A0A0J9YWL0|A0A0J9YWL0_HUMAN	494000	969000	555000	593000	1110000	1100000	1	1.96	1.12	1.2	2.24	2.22	Beta/gamma crystallin domain-containing protein 1 OS=Homo sapiens OX=9606 GN=CRYBG1 PE=1 SV=1
A0A494C1M5|A0A494C1M5_HUMAN	494000	969000	555000	593000	1110000	1100000	1	1.96	1.12	1.2	2.24	2.22	Beta/gamma crystallin domain-containing protein 1 (Fragment) OS=Homo sapiens OX=9606 GN=CRYBG1 PE=1 SV=1
sp|Q5VST9|OBSCN_HUMAN	3650000	2490000	2900000	4090000	2850000	3580000	1	0.68	0.79	1.12	0.78	0.98	Obscurin OS=Homo sapiens OX=9606 GN=OBSCN PE=1 SV=3
A0A7P0Z489|A0A7P0Z489_HUMAN	3650000	2490000	2900000	4090000	2850000	3580000	1	0.68	0.79	1.12	0.78	0.98	Obscurin OS=Homo sapiens OX=9606 GN=OBSCN PE=4 SV=1
sp|O60522|TDRD6_HUMAN	96700	79900	73200	28000	71300	30200	1	0.83	0.76	0.29	0.74	0.31	Tudor domain-containing protein 6 OS=Homo sapiens OX=9606 GN=TDRD6 PE=2 SV=2
sp|Q9Y493|ZAN_HUMAN	251000	497000	335000	369000	525000	518000	1	1.98	1.33	1.47	2.09	2.06	Zonadhesin OS=Homo sapiens OX=9606 GN=ZAN PE=2 SV=5
sp|Q9Y6L7|TLL2_HUMAN	494000	564000	552000	336000	342000	381000	1	1.14	1.12	0.68	0.69	0.77	Tolloid-like protein 2 OS=Homo sapiens OX=9606 GN=TLL2 PE=1 SV=1
sp|P13497|BMP1_HUMAN	494000	564000	552000	336000	342000	381000	1	1.14	1.12	0.68	0.69	0.77	Bone morphogenetic protein 1 OS=Homo sapiens OX=9606 GN=BMP1 PE=1 SV=2
sp|O43897|TLL1_HUMAN	494000	564000	552000	336000	342000	381000	1	1.14	1.12	0.68	0.69	0.77	Tolloid-like protein 1 OS=Homo sapiens OX=9606 GN=TLL1 PE=1 SV=1
E9PD25|E9PD25_HUMAN	494000	564000	552000	336000	342000	381000	1	1.14	1.12	0.68	0.69	0.77	Metalloendopeptidase OS=Homo sapiens OX=9606 GN=TLL1 PE=1 SV=1
sp|P25705|ATPA_HUMAN	1000000	1590000	1470000	1280000	239000	343000	1	1.58	1.47	1.28	0.24	0.34	ATP synthase subunit alpha mitochondrial OS=Homo sapiens OX=9606 GN=ATP5F1A PE=1 SV=1
K7EQH4|K7EQH4_HUMAN	1000000	1590000	1470000	1280000	239000	343000	1	1.58	1.47	1.28	0.24	0.34	ATP synthase subunit alpha mitochondrial (Fragment) OS=Homo sapiens OX=9606 GN=ATP5F1A PE=1 SV=1
K7EJP1|K7EJP1_HUMAN	1000000	1590000	1470000	1280000	239000	343000	1	1.58	1.47	1.28	0.24	0.34	ATP synthase subunit alpha mitochondrial (Fragment) OS=Homo sapiens OX=9606 GN=ATP5F1A PE=1 SV=8
K7ERX7|K7ERX7_HUMAN	1000000	1590000	1470000	1280000	239000	343000	1	1.58	1.47	1.28	0.24	0.34	ATP synthase subunit alpha mitochondrial (Fragment) OS=Homo sapiens OX=9606 GN=ATP5F1A PE=1 SV=1
K7EK77|K7EK77_HUMAN	1000000	1590000	1470000	1280000	239000	343000	1	1.58	1.47	1.28	0.24	0.34	ATP synthase subunit alpha mitochondrial (Fragment) OS=Homo sapiens OX=9606 GN=ATP5F1A PE=1 SV=1
E9PK89|E9PK89_HUMAN	1160000	1090000	1220000	1220000	1010000	1180000	1	0.94	1.05	1.05	0.87	1.02	Guanine nucleotide exchange factor for Rab-3A OS=Homo sapiens OX=9606 GN=RAB3IL1 PE=1 SV=9
A0A087X0M6|A0A087X0M6_HUMAN	221000	207000	177000	287000	305000	211000	1	0.94	0.8	1.3	1.38	0.95	Zinc finger protein 850 OS=Homo sapiens OX=9606 GN=ZNF850 PE=1 SV=1
sp|A8MQ14|ZN850_HUMAN	221000	207000	177000	287000	305000	211000	1	0.94	0.8	1.3	1.38	0.95	Zinc finger protein 850 OS=Homo sapiens OX=9606 GN=ZNF850 PE=3 SV=2
sp|P05026|AT1B1_HUMAN	1210000	924000	1270000	988000	140000	185000	1	0.76	1.05	0.82	0.12	0.15	Sodium/potassium-transporting ATPase subunit beta-1 OS=Homo sapiens OX=9606 GN=ATP1B1 PE=1 SV=1
E9PFD7|E9PFD7_HUMAN	1390000	1500000	1170000	1430000	1860000	1080000	1	1.08	0.84	1.03	1.33	0.78	Receptor protein-tyrosine kinase OS=Homo sapiens OX=9606 GN=EGFR PE=1 SV=3
sp|P00533|EGFR_HUMAN	1390000	1500000	1170000	1430000	1860000	1080000	1	1.08	0.84	1.03	1.33	0.78	Epidermal growth factor receptor OS=Homo sapiens OX=9606 GN=EGFR PE=1 SV=2
sp|Q8IUL8|CILP2_HUMAN	306000	226000	224000	234000	168000	243000	1	0.74	0.73	0.76	0.55	0.79	Cartilage intermediate layer protein 2 OS=Homo sapiens OX=9606 GN=CILP2 PE=2 SV=2
K7EPJ4|K7EPJ4_HUMAN	306000	226000	224000	234000	168000	243000	1	0.74	0.73	0.76	0.55	0.79	Cartilage intermediate layer protein 2 OS=Homo sapiens OX=9606 GN=CILP2 PE=1 SV=1
sp|Q5XPI4|RN123_HUMAN	184000	351000	502000	231000	291000	233000	1	1.9	2.72	1.25	1.58	1.26	E3 ubiquitin-protein ligase RNF123 OS=Homo sapiens OX=9606 GN=RNF123 PE=1 SV=1
A0A0D9SFK2|A0A0D9SFK2_HUMAN	150000	210000	154000	119000	159000	143000	1	1.4	1.03	0.79	1.06	0.95	Unconventional myosin-XVIIIa OS=Homo sapiens OX=9606 GN=MYO18A PE=1 SV=1
sp|Q92614|MY18A_HUMAN	150000	210000	154000	119000	159000	143000	1	1.4	1.03	0.79	1.06	0.95	Unconventional myosin-XVIIIa OS=Homo sapiens OX=9606 GN=MYO18A PE=1 SV=3
sp|Q13136|LIPA1_HUMAN	482000	519000	553000	323000	494000	415000	1	1.08	1.15	0.67	1.02	0.86	Liprin-alpha-1 OS=Homo sapiens OX=9606 GN=PPFIA1 PE=1 SV=1
A0A2R8Y7R9|A0A2R8Y7R9_HUMAN	482000	519000	553000	323000	494000	415000	1	1.08	1.15	0.67	1.02	0.86	Liprin-alpha-1 (Fragment) OS=Homo sapiens OX=9606 GN=PPFIA1 PE=1 SV=1
E9PJZ7|E9PJZ7_HUMAN	482000	519000	553000	323000	494000	415000	1	1.08	1.15	0.67	1.02	0.86	Liprin-alpha-1 OS=Homo sapiens OX=9606 GN=PPFIA1 PE=1 SV=1
B5MBY4|B5MBY4_HUMAN	260000	824000	385000	325000	227000	204000	1	3.17	1.48	1.25	0.88	0.79	Ankyrin repeat and MYND domain containing 1 isoform CRA_a OS=Homo sapiens OX=9606 GN=ANKMY1 PE=1 SV=1
sp|Q9P2S6|ANKY1_HUMAN	260000	824000	385000	325000	227000	204000	1	3.17	1.48	1.25	0.88	0.79	Ankyrin repeat and MYND domain-containing protein 1 OS=Homo sapiens OX=9606 GN=ANKMY1 PE=2 SV=2
sp|Q8TC56|FA71B_HUMAN	80400	94600	77000	101000	80000	78000	1	1.18	0.96	1.25	1	0.97	Protein FAM71B OS=Homo sapiens OX=9606 GN=FAM71B PE=1 SV=2
A0A087WZQ5|A0A087WZQ5_HUMAN	506000	637000	509000	486000	758000	813000	1	1.26	1.01	0.96	1.5	1.6	Receptor protein-tyrosine kinase OS=Homo sapiens OX=9606 GN=MERTK PE=1 SV=1
A0A0C4DFW9|A0A0C4DFW9_HUMAN	860000	708000	836000	776000	580000	703000	1	0.82	0.97	0.9	0.67	0.82	Cellular tumor antigen p53 OS=Homo sapiens OX=9606 GN=TP73 PE=1 SV=1
sp|P17301|ITA2_HUMAN	146000	320000	94700	65700	159000	260000	1	2.19	0.65	0.45	1.09	1.78	Integrin alpha-2 OS=Homo sapiens OX=9606 GN=ITGA2 PE=1 SV=1
E7EMF1|E7EMF1_HUMAN	146000	320000	94700	65700	159000	260000	1	2.19	0.65	0.45	1.09	1.78	Integrin alpha-2 OS=Homo sapiens OX=9606 GN=ITGA2 PE=1 SV=1
sp|Q8NFC6|BD1L1_HUMAN	249000	169000	158000	212000	141000	174000	1	0.68	0.63	0.85	0.57	0.7	Biorientation of chromosomes in cell division protein 1-like 1 OS=Homo sapiens OX=9606 GN=BOD1L1 PE=1 SV=2
sp|Q9H7D0|DOCK5_HUMAN	5430000	4610000	6080000	4970000	4390000	4550000	1	0.85	1.12	0.92	0.81	0.84	Dedicator of cytokinesis protein 5 OS=Homo sapiens OX=9606 GN=DOCK5 PE=1 SV=3
sp|Q9Y5R5|DMRT2_HUMAN	443000	461000	459000	418000	401000	346000	1	1.04	1.04	0.94	0.91	0.78	Doublesex- and mab-3-related transcription factor 2 OS=Homo sapiens OX=9606 GN=DMRT2 PE=1 SV=2
sp|Q9H2Y7|ZN106_HUMAN	762000	1970000	3320000	1290000	921000	2110000	1	2.59	4.36	1.69	1.21	2.77	Zinc finger protein 106 OS=Homo sapiens OX=9606 GN=ZNF106 PE=1 SV=1
G3V470|G3V470_HUMAN	92500	158000	96900	140000	151000	115000	1	1.71	1.05	1.52	1.64	1.24	Telomerase protein component 1 OS=Homo sapiens OX=9606 GN=TEP1 PE=1 SV=1
sp|Q99973|TEP1_HUMAN	92500	158000	96900	140000	151000	115000	1	1.71	1.05	1.52	1.64	1.24	Telomerase protein component 1 OS=Homo sapiens OX=9606 GN=TEP1 PE=1 SV=2
sp|P10636|TAU_HUMAN	102000	267000	127000	209000	286000	168000	1	2.61	1.24	2.05	2.81	1.65	Microtubule-associated protein tau OS=Homo sapiens OX=9606 GN=MAPT PE=1 SV=5
A0A0G2JPD5|A0A0G2JPD5_HUMAN	102000	267000	127000	209000	286000	168000	1	2.61	1.24	2.05	2.81	1.65	Microtubule-associated protein OS=Homo sapiens OX=9606 GN=MAPT PE=1 SV=1
A0A0G2JS76|A0A0G2JS76_HUMAN	102000	267000	127000	209000	286000	168000	1	2.61	1.24	2.05	2.81	1.65	Microtubule-associated protein OS=Homo sapiens OX=9606 GN=MAPT PE=1 SV=1
E7ET15|E7ET15_HUMAN	186000	211000	294000	235000	197000	260000	1	1.13	1.58	1.26	1.06	1.4	U2 snRNP-associated SURP motif-containing protein OS=Homo sapiens OX=9606 GN=U2SURP PE=1 SV=1
sp|O15042|SR140_HUMAN	186000	211000	294000	235000	197000	260000	1	1.13	1.58	1.26	1.06	1.4	U2 snRNP-associated SURP motif-containing protein OS=Homo sapiens OX=9606 GN=U2SURP PE=1 SV=2
sp|Q9NSI6|BRWD1_HUMAN	1200000	823000	707000	1070000	850000	1020000	1	0.69	0.59	0.89	0.71	0.85	Bromodomain and WD repeat-containing protein 1 OS=Homo sapiens OX=9606 GN=BRWD1 PE=1 SV=4
H7C409|H7C409_HUMAN	1200000	823000	707000	1070000	850000	1020000	1	0.69	0.59	0.89	0.71	0.85	Bromodomain and WD repeat-containing protein 1 (Fragment) OS=Homo sapiens OX=9606 GN=BRWD1 PE=1 SV=1
F5H5U2|F5H5U2_HUMAN	2260000	1410000	2180000	2590000	1810000	1940000	1	0.62	0.97	1.14	0.8	0.86	RNA helicase OS=Homo sapiens OX=9606 GN=DDX55 PE=1 SV=1
sp|Q8NHQ9|DDX55_HUMAN	2260000	1410000	2180000	2590000	1810000	1940000	1	0.62	0.97	1.14	0.8	0.86	ATP-dependent RNA helicase DDX55 OS=Homo sapiens OX=9606 GN=DDX55 PE=1 SV=3
sp|O15018|PDZD2_HUMAN	27700	206000	22700	0	0	21300	1	7.44	0.82	0	0	0.77	PDZ domain-containing protein 2 OS=Homo sapiens OX=9606 GN=PDZD2 PE=1 SV=4
sp|P21817|RYR1_HUMAN	987000	1420000	1290000	1370000	1300000	1660000	1	1.44	1.31	1.39	1.32	1.68	Ryanodine receptor 1 OS=Homo sapiens OX=9606 GN=RYR1 PE=1 SV=3
sp|Q9UBN4|TRPC4_HUMAN	466000	1200000	548000	786000	665000	869000	1	2.57	1.18	1.69	1.43	1.86	Short transient receptor potential channel 4 OS=Homo sapiens OX=9606 GN=TRPC4 PE=1 SV=1
sp|Q53FA7|QORX_HUMAN	152000	286000	157000	1190000	171000	1120000	1	1.88	1.03	7.81	1.13	7.37	Quinone oxidoreductase PIG3 OS=Homo sapiens OX=9606 GN=TP53I3 PE=1 SV=2
A0A3B3ISL2|A0A3B3ISL2_HUMAN	143000	76100	146000	194000	119000	134000	1	0.53	1.02	1.35	0.83	0.93	Paternally-expressed gene 3 protein (Fragment) OS=Homo sapiens OX=9606 GN=PEG3 PE=1 SV=1
A0A3B3IRU6|A0A3B3IRU6_HUMAN	143000	76100	146000	194000	119000	134000	1	0.53	1.02	1.35	0.83	0.93	Paternally-expressed gene 3 protein OS=Homo sapiens OX=9606 GN=PEG3 PE=1 SV=1
sp|Q9GZU2|PEG3_HUMAN	143000	76100	146000	194000	119000	134000	1	0.53	1.02	1.35	0.83	0.93	Paternally-expressed gene 3 protein OS=Homo sapiens OX=9606 GN=PEG3 PE=1 SV=1
B7Z2Y2|B7Z2Y2_HUMAN	725000	849000	769000	3170000	577000	697000	1	1.17	1.06	4.38	0.79	0.96	Component of oligomeric Golgi complex 2 OS=Homo sapiens OX=9606 GN=COG2 PE=1 SV=1
sp|Q14746|COG2_HUMAN	725000	849000	769000	3170000	577000	697000	1	1.17	1.06	4.38	0.79	0.96	Conserved oligomeric Golgi complex subunit 2 OS=Homo sapiens OX=9606 GN=COG2 PE=1 SV=1
sp|Q9NSK0|KLC4_HUMAN	63600000	52000000	67200000	54800000	21600000	39800000	1	0.82	1.06	0.86	0.34	0.63	Kinesin light chain 4 OS=Homo sapiens OX=9606 GN=KLC4 PE=1 SV=3
sp|Q9ULL8|SHRM4_HUMAN	675000	730000	877000	847000	901000	655000	1	1.08	1.3	1.25	1.33	0.97	Protein Shroom4 OS=Homo sapiens OX=9606 GN=SHROOM4 PE=1 SV=3
H0YHC1|H0YHC1_HUMAN	927000	1300000	1380000	2210000	1510000	1650000	1	1.41	1.49	2.38	1.62	1.79	Mediator of RNA polymerase II transcription subunit 13-like (Fragment) OS=Homo sapiens OX=9606 GN=MED13L PE=1 SV=2
sp|Q02224|CENPE_HUMAN	2870000	3220000	3220000	2390000	4500000	4400000	1	1.12	1.12	0.83	1.57	1.53	Centromere-associated protein E OS=Homo sapiens OX=9606 GN=CENPE PE=1 SV=2
A0A087X0P0|A0A087X0P0_HUMAN	2870000	3220000	3220000	2390000	4500000	4400000	1	1.12	1.12	0.83	1.57	1.53	Centromere-associated protein E OS=Homo sapiens OX=9606 GN=CENPE PE=1 SV=1
M0R0X2|M0R0X2_HUMAN	278000	466000	294000	254000	389000	159000	1	1.67	1.06	0.91	1.4	0.57	Neurotrophin-4 (Fragment) OS=Homo sapiens OX=9606 GN=NTF4 PE=3 SV=1
sp|P29590|PML_HUMAN	884000	704000	1060000	983000	652000	848000	1	0.8	1.2	1.11	0.74	0.96	Protein PML OS=Homo sapiens OX=9606 GN=PML PE=1 SV=3
A0A7I2V5U0|A0A7I2V5U0_HUMAN	560000	746000	459000	613000	595000	828000	1	1.33	0.82	1.09	1.06	1.48	Phospholipid-transporting ATPase ABCA1 OS=Homo sapiens OX=9606 GN=ABCA1 PE=1 SV=1
A0A3B3ITG1|A0A3B3ITG1_HUMAN	332000	230000	312000	318000	440000	333000	1	0.69	0.94	0.96	1.32	1	Laminin subunit alpha-3 (Fragment) OS=Homo sapiens OX=9606 GN=LAMA3 PE=1 SV=1
A0A0A0MSA0|A0A0A0MSA0_HUMAN	332000	230000	312000	318000	440000	333000	1	0.69	0.94	0.96	1.32	1	Laminin subunit alpha-3 OS=Homo sapiens OX=9606 GN=LAMA3 PE=1 SV=1
sp|Q16787|LAMA3_HUMAN	332000	230000	312000	318000	440000	333000	1	0.69	0.94	0.96	1.32	1	Laminin subunit alpha-3 OS=Homo sapiens OX=9606 GN=LAMA3 PE=1 SV=2
A0A0A0MTS5|A0A0A0MTS5_HUMAN	332000	230000	312000	318000	440000	333000	1	0.69	0.94	0.96	1.32	1	HCG1811249 isoform CRA_f OS=Homo sapiens OX=9606 GN=LAMA3 PE=1 SV=1
A0A0A6YYF2|A0A0A6YYF2_HUMAN	332000	230000	312000	318000	440000	333000	1	0.69	0.94	0.96	1.32	1	HCG1811249 isoform CRA_e OS=Homo sapiens OX=9606 GN=LAMA3 PE=1 SV=1
K7EIP4|K7EIP4_HUMAN	332000	230000	312000	318000	440000	333000	1	0.69	0.94	0.96	1.32	1	Laminin subunit alpha-3 (Fragment) OS=Homo sapiens OX=9606 GN=LAMA3 PE=1 SV=2
C9JZI1|C9JZI1_HUMAN	1160000	1560000	1320000	1110000	1310000	1580000	1	1.35	1.15	0.96	1.13	1.37	Replication factor C subunit 4 OS=Homo sapiens OX=9606 GN=RFC4 PE=1 SV=1
sp|P35249|RFC4_HUMAN	1160000	1560000	1320000	1110000	1310000	1580000	1	1.35	1.15	0.96	1.13	1.37	Replication factor C subunit 4 OS=Homo sapiens OX=9606 GN=RFC4 PE=1 SV=2
H7C1P0|H7C1P0_HUMAN	1160000	1560000	1320000	1110000	1310000	1580000	1	1.35	1.15	0.96	1.13	1.37	Replication factor C subunit 4 (Fragment) OS=Homo sapiens OX=9606 GN=RFC4 PE=1 SV=1
F8WC22|F8WC22_HUMAN	829000	1300000	700000	837000	791000	1000000	1	1.57	0.84	1.01	0.95	1.21	Protein downstream neighbor of Son OS=Homo sapiens OX=9606 GN=DONSON PE=1 SV=1
sp|Q86XR8|CEP57_HUMAN	454000	297000	382000	153000	193000	156000	1	0.66	0.84	0.34	0.42	0.34	Centrosomal protein of 57 kDa OS=Homo sapiens OX=9606 GN=CEP57 PE=1 SV=2
K7EMM8|K7EMM8_HUMAN	585000	1040000	835000	1150000	1660000	1140000	1	1.78	1.43	1.96	2.84	1.95	Glyoxylate reductase 1 homolog (Fragment) OS=Homo sapiens OX=9606 GN=GLYR1 PE=1 SV=2
sp|Q9UMS5|PHTF1_HUMAN	1560000	1870000	1350000	1350000	1620000	1360000	1	1.2	0.86	0.86	1.04	0.87	Protein PHTF1 OS=Homo sapiens OX=9606 GN=PHTF1 PE=2 SV=2
sp|Q8TCG1|CIP2A_HUMAN	73100	104000	1450000	18300	46000	0	1	1.42	19.9	0.25	0.63	0	Protein CIP2A OS=Homo sapiens OX=9606 GN=CIP2A PE=1 SV=2
A0A087X211|A0A087X211_HUMAN	73100	104000	1450000	18300	46000	0	1	1.42	19.9	0.25	0.63	0	Protein CIP2A OS=Homo sapiens OX=9606 GN=CIP2A PE=1 SV=1
sp|O60241|AGRB2_HUMAN	867000	1800000	886000	585000	737000	1020000	1	2.07	1.02	0.67	0.85	1.18	Adhesion G protein-coupled receptor B2 OS=Homo sapiens OX=9606 GN=ADGRB2 PE=1 SV=2
A2A3C1|A2A3C1_HUMAN	867000	1800000	886000	585000	737000	1020000	1	2.07	1.02	0.67	0.85	1.18	Adhesion G protein-coupled receptor B2 OS=Homo sapiens OX=9606 GN=ADGRB2 PE=1 SV=1
A2A3C3|A2A3C3_HUMAN	867000	1800000	886000	585000	737000	1020000	1	2.07	1.02	0.67	0.85	1.18	Adhesion G protein-coupled receptor B2 OS=Homo sapiens OX=9606 GN=ADGRB2 PE=1 SV=1
A2A3C6|A2A3C6_HUMAN	867000	1800000	886000	585000	737000	1020000	1	2.07	1.02	0.67	0.85	1.18	Adhesion G protein-coupled receptor B2 OS=Homo sapiens OX=9606 GN=ADGRB2 PE=1 SV=1
A2A3C2|A2A3C2_HUMAN	867000	1800000	886000	585000	737000	1020000	1	2.07	1.02	0.67	0.85	1.18	Adhesion G protein-coupled receptor B2 OS=Homo sapiens OX=9606 GN=ADGRB2 PE=1 SV=1
F8WE85|F8WE85_HUMAN	481000	374000	385000	424000	743000	589000	1	0.78	0.8	0.88	1.55	1.23	FRAS1-related extracellular matrix protein 1 OS=Homo sapiens OX=9606 GN=FREM1 PE=1 SV=2
sp|Q15669|RHOH_HUMAN	508000	490000	613000	775000	779000	880000	1	0.96	1.21	1.53	1.53	1.73	Rho-related GTP-binding protein RhoH OS=Homo sapiens OX=9606 GN=RHOH PE=1 SV=1
sp|P04114|APOB_HUMAN	2174000000	3432000000	2779000000	3761000000	5145000000	2762000000	1	1.58	1.28	1.73	2.37	1.27	Apolipoprotein B-100 OS=Homo sapiens OX=9606 GN=APOB PE=1 SV=2
sp|P02751|FINC_HUMAN	3519000000	3761000000	3518000000	3724000000	3732000000	4742000000	1	1.07	1	1.06	1.06	1.35	Fibronectin OS=Homo sapiens OX=9606 GN=FN1 PE=1 SV=5
sp|P02768|ALBU_HUMAN	109300000000	91720000000	105100000000	105800000000	72720000000	80080000000	1	0.84	0.96	0.97	0.67	0.73	Albumin OS=Homo sapiens OX=9606 GN=ALB PE=1 SV=2
sp|P02671|FIBA_HUMAN	30810000000	37510000000	33620000000	27320000000	51310000000	44280000000	1	1.22	1.09	0.89	1.67	1.44	Fibrinogen alpha chain OS=Homo sapiens OX=9606 GN=FGA PE=1 SV=2
sp|P01024|CO3_HUMAN	2054000000	2480000000	2425000000	2674000000	2137000000	3398000000	1	1.21	1.18	1.3	1.04	1.65	Complement C3 OS=Homo sapiens OX=9606 GN=C3 PE=1 SV=2
sp|P02787|TRFE_HUMAN	3954000000	2996000000	4222000000	4316000000	2654000000	3192000000	1	0.76	1.07	1.09	0.67	0.81	Serotransferrin OS=Homo sapiens OX=9606 GN=TF PE=1 SV=3
sp|P02675|FIBB_HUMAN	14860000000	19690000000	16040000000	14530000000	23620000000	23130000000	1	1.33	1.08	0.98	1.59	1.56	Fibrinogen beta chain OS=Homo sapiens OX=9606 GN=FGB PE=1 SV=2
sp|P08603|CFAH_HUMAN	558600000	826900000	566800000	808900000	646900000	815500000	1	1.48	1.01	1.45	1.16	1.46	Complement factor H OS=Homo sapiens OX=9606 GN=CFH PE=1 SV=4
sp|P00747|PLMN_HUMAN	2787000000	3793000000	2807000000	3723000000	4400000000	3695000000	1	1.36	1.01	1.34	1.58	1.33	Plasminogen OS=Homo sapiens OX=9606 GN=PLG PE=1 SV=2
sp|P04275|VWF_HUMAN	177100000	172500000	188400000	199300000	494600000	291700000	1	0.97	1.06	1.13	2.79	1.65	von Willebrand factor OS=Homo sapiens OX=9606 GN=VWF PE=1 SV=4
sp|P04003|C4BPA_HUMAN	3566000000	5097000000	3664000000	5376000000	5753000000	5815000000	1	1.43	1.03	1.51	1.61	1.63	C4b-binding protein alpha chain OS=Homo sapiens OX=9606 GN=C4BPA PE=1 SV=2
sp|P05160|F13B_HUMAN	136200000	171400000	116300000	123500000	121800000	143300000	1	1.26	0.85	0.91	0.89	1.05	Coagulation factor XIII B chain OS=Homo sapiens OX=9606 GN=F13B PE=1 SV=3
sp|P01023|A2MG_HUMAN	2124000000	1288000000	1972000000	1420000000	1251000000	1559000000	1	0.61	0.93	0.67	0.59	0.73	Alpha-2-macroglobulin OS=Homo sapiens OX=9606 GN=A2M PE=1 SV=3
sp|P00450|CERU_HUMAN	165300000	179200000	176300000	125300000	118900000	141100000	1	1.08	1.07	0.76	0.72	0.85	Ceruloplasmin OS=Homo sapiens OX=9606 GN=CP PE=1 SV=1
sp|P0C0L5|CO4B_HUMAN	103400000	122800000	108100000	124200000	157300000	122900000	1	1.19	1.04	1.2	1.52	1.19	Complement C4-B OS=Homo sapiens OX=9606 GN=C4B_2 PE=1 SV=2
sp|P0C0L4|CO4A_HUMAN	83970	125600	73340	130100	143000	145100	1	1.5	0.87	1.55	1.7	1.73	Complement C4-A OS=Homo sapiens OX=9606 GN=C4A PE=1 SV=2
C9JEU5|C9JEU5_HUMAN	919500	1361000	1107000	1131000	1532000	1470000	1	1.48	1.2	1.23	1.67	1.6	Fibrinogen gamma chain OS=Homo sapiens OX=9606 GN=FGG PE=1 SV=1
C9JC84|C9JC84_HUMAN	919500	1361000	1107000	1131000	1532000	1470000	1	1.48	1.2	1.23	1.67	1.6	Fibrinogen gamma chain OS=Homo sapiens OX=9606 GN=FGG PE=1 SV=1
sp|P01031|CO5_HUMAN	259300000	431400000	330100000	311800000	374500000	451400000	1	1.66	1.27	1.2	1.44	1.74	Complement C5 OS=Homo sapiens OX=9606 GN=C5 PE=1 SV=4
B4E1Z4|B4E1Z4_HUMAN	254400000	312400000	298900000	269900000	280300000	258700000	1	1.23	1.17	1.06	1.1	1.02	C3/C5 convertase OS=Homo sapiens OX=9606 PE=1 SV=1
sp|P00738|HPT_HUMAN	136700000	244100000	150600000	117400000	183800000	152500000	1	1.79	1.1	0.86	1.34	1.12	Haptoglobin OS=Homo sapiens OX=9606 GN=HP PE=1 SV=1
sp|P04264|K2C1_HUMAN	202100000	327600000	190200000	202100000	377000000	343300000	1	1.62	0.94	1	1.87	1.7	Keratin type II cytoskeletal 1 OS=Homo sapiens OX=9606 GN=KRT1 PE=1 SV=6
sp|P02774|VTDB_HUMAN	605200000	576300000	609900000	536200000	470600000	462400000	1	0.95	1.01	0.89	0.78	0.76	Vitamin D-binding protein OS=Homo sapiens OX=9606 GN=GC PE=1 SV=2
D6RF35|D6RF35_HUMAN	605200000	576300000	609900000	536200000	470600000	462400000	1	0.95	1.01	0.89	0.78	0.76	Gc-globulin OS=Homo sapiens OX=9606 GN=GC PE=1 SV=1
sp|P08519|APOA_HUMAN	37430000	77210000	85210000	112100000	98040000	79330000	1	2.06	2.28	3	2.62	2.12	Apolipoprotein(a) OS=Homo sapiens OX=9606 GN=LPA PE=1 SV=1
sp|P00734|THRB_HUMAN	189400000	173300000	200700000	138200000	173400000	207800000	1	0.92	1.06	0.73	0.92	1.1	Prothrombin OS=Homo sapiens OX=9606 GN=F2 PE=1 SV=2
sp|P01871|IGHM_HUMAN	2880000000	3257000000	2326000000	3690000000	3886000000	3643000000	1	1.13	0.81	1.28	1.35	1.27	Immunoglobulin heavy constant mu OS=Homo sapiens OX=9606 GN=IGHM PE=1 SV=4
sp|P35908|K22E_HUMAN	36680000	55710000	39510000	37470000	75960000	60860000	1	1.52	1.08	1.02	2.07	1.66	Keratin type II cytoskeletal 2 epidermal OS=Homo sapiens OX=9606 GN=KRT2 PE=1 SV=2
A0A1B0GVI3|A0A1B0GVI3_HUMAN	116800000	228200000	117600000	122700000	302800000	233100000	1	1.95	1.01	1.05	2.59	2	Keratin type I cytoskeletal 10 OS=Homo sapiens OX=9606 GN=KRT10 PE=1 SV=2
sp|P13645|K1C10_HUMAN	116800000	228200000	117600000	122700000	302800000	233100000	1	1.95	1.01	1.05	2.59	2	Keratin type I cytoskeletal 10 OS=Homo sapiens OX=9606 GN=KRT10 PE=1 SV=6
sp|P01008|ANT3_HUMAN	384100000	395700000	394000000	336200000	380200000	310800000	1	1.03	1.03	0.88	0.99	0.81	Antithrombin-III OS=Homo sapiens OX=9606 GN=SERPINC1 PE=1 SV=1
sp|P02647|APOA1_HUMAN	4321000000	3658000000	4337000000	4367000000	3561000000	3865000000	1	0.85	1	1.01	0.82	0.89	Apolipoprotein A-I OS=Homo sapiens OX=9606 GN=APOA1 PE=1 SV=1
sp|P02649|APOE_HUMAN	508300000	401300000	343500000	632200000	408200000	380200000	1	0.79	0.68	1.24	0.8	0.75	Apolipoprotein E OS=Homo sapiens OX=9606 GN=APOE PE=1 SV=1
sp|P01042|KNG1_HUMAN	156900000	165800000	158800000	149000000	168200000	148000000	1	1.06	1.01	0.95	1.07	0.94	Kininogen-1 OS=Homo sapiens OX=9606 GN=KNG1 PE=1 SV=2
A0A3B3ISJ1|A0A3B3ISJ1_HUMAN	473700000	551800000	494600000	704000000	850900000	808600000	1	1.16	1.04	1.49	1.8	1.71	Vitamin K-dependent protein S OS=Homo sapiens OX=9606 GN=PROS1 PE=1 SV=1
sp|P07225|PROS_HUMAN	473700000	551800000	494600000	704000000	850900000	808600000	1	1.16	1.04	1.49	1.8	1.71	Vitamin K-dependent protein S OS=Homo sapiens OX=9606 GN=PROS1 PE=1 SV=1
A0A0S2Z4L3|A0A0S2Z4L3_HUMAN	473700000	551800000	494600000	704000000	850900000	808600000	1	1.16	1.04	1.49	1.8	1.71	Vitamin K-dependent protein S (Fragment) OS=Homo sapiens OX=9606 GN=PROS1 PE=1 SV=1
sp|P0DOY2|IGLC2_HUMAN	1139000000	1412000000	859600000	1715000000	1106000000	1613000000	1	1.24	0.76	1.51	0.97	1.42	Immunoglobulin lambda constant 2 OS=Homo sapiens OX=9606 GN=IGLC2 PE=1 SV=1
sp|P06727|APOA4_HUMAN	465000000	491800000	483600000	417400000	389600000	457200000	1	1.06	1.04	0.9	0.84	0.98	Apolipoprotein A-IV OS=Homo sapiens OX=9606 GN=APOA4 PE=1 SV=4
sp|P43652|AFAM_HUMAN	342900000	438900000	348900000	436100000	311200000	337500000	1	1.28	1.02	1.27	0.91	0.98	Afamin OS=Homo sapiens OX=9606 GN=AFM PE=1 SV=1
sp|P13671|CO6_HUMAN	63380000	87860000	70600000	86360000	84220000	84110000	1	1.39	1.11	1.36	1.33	1.33	Complement component C6 OS=Homo sapiens OX=9606 GN=C6 PE=1 SV=3
sp|P13647|K2C5_HUMAN	13270000	16270000	9542000	11320000	15020000	14560000	1	1.23	0.72	0.85	1.13	1.1	Keratin type II cytoskeletal 5 OS=Homo sapiens OX=9606 GN=KRT5 PE=1 SV=3
sp|P01834|IGKC_HUMAN	190600000	383900000	256900000	461600000	443300000	500000000	1	2.01	1.35	2.42	2.33	2.62	Immunoglobulin kappa constant OS=Homo sapiens OX=9606 GN=IGKC PE=1 SV=2
A0A5H1ZRQ3|A0A5H1ZRQ3_HUMAN	190600000	383900000	256900000	461600000	443300000	500000000	1	2.01	1.35	2.42	2.33	2.62	Immunoglobulin kappa constant (Fragment) OS=Homo sapiens OX=9606 GN=IGKC PE=1 SV=1
C9JPQ9|C9JPQ9_HUMAN	344500000	960500000	485100000	513600000	979200000	882000000	1	2.79	1.41	1.49	2.84	2.56	Fibrinogen gamma chain (Fragment) OS=Homo sapiens OX=9606 GN=FGG PE=1 SV=1
C9JU00|C9JU00_HUMAN	344500000	960500000	485100000	513600000	979200000	882000000	1	2.79	1.41	1.49	2.84	2.56	Fibrinogen gamma chain (Fragment) OS=Homo sapiens OX=9606 GN=FGG PE=1 SV=1
sp|P03952|KLKB1_HUMAN	59870000	62700000	55710000	62820000	68850000	56440000	1	1.05	0.93	1.05	1.15	0.94	Plasma kallikrein OS=Homo sapiens OX=9606 GN=KLKB1 PE=1 SV=1
H0YAC1|H0YAC1_HUMAN	59870000	62700000	55710000	62820000	68850000	56440000	1	1.05	0.93	1.05	1.15	0.94	Plasma kallikrein (Fragment) OS=Homo sapiens OX=9606 GN=KLKB1 PE=1 SV=1
A0A286YES1|A0A286YES1_HUMAN	830500000	609100000	485500000	592400000	567000000	579800000	1	0.73	0.58	0.71	0.68	0.7	Immunoglobulin heavy constant gamma 3 (Fragment) OS=Homo sapiens OX=9606 GN=IGHG3 PE=1 SV=1
A0A4W9A917|A0A4W9A917_HUMAN	830500000	609100000	485500000	592400000	567000000	579800000	1	0.73	0.58	0.71	0.68	0.7	Immunoglobulin heavy constant gamma 3 (Fragment) OS=Homo sapiens OX=9606 GN=IGHG3 PE=1 SV=1
sp|P01860|IGHG3_HUMAN	830500000	609100000	485500000	592400000	567000000	579800000	1	0.73	0.58	0.71	0.68	0.7	Immunoglobulin heavy constant gamma 3 OS=Homo sapiens OX=9606 GN=IGHG3 PE=1 SV=2
A0A0B4J231|A0A0B4J231_HUMAN	62910000	87880000	64640000	199100000	138300000	224200000	1	1.4	1.03	3.16	2.2	3.56	Immunoglobulin lambda-like polypeptide 5 OS=Homo sapiens OX=9606 GN=IGLL5 PE=1 SV=1
sp|B9A064|IGLL5_HUMAN	62910000	87880000	64640000	199100000	138300000	224200000	1	1.4	1.03	3.16	2.2	3.56	Immunoglobulin lambda-like polypeptide 5 OS=Homo sapiens OX=9606 GN=IGLL5 PE=2 SV=2
A0A5H1ZRQ4|A0A5H1ZRQ4_HUMAN	62910000	87880000	64640000	199100000	138300000	224200000	1	1.4	1.03	3.16	2.2	3.56	Immunoglobulin lambda constant 1 (Fragment) OS=Homo sapiens OX=9606 GN=IGLC1 PE=4 SV=1
sp|P0CG04|IGLC1_HUMAN	62910000	87880000	64640000	199100000	138300000	224200000	1	1.4	1.03	3.16	2.2	3.56	Immunoglobulin lambda constant 1 OS=Homo sapiens OX=9606 GN=IGLC1 PE=1 SV=1
sp|P07357|CO8A_HUMAN	25040000	28660000	29690000	27600000	36240000	35850000	1	1.14	1.19	1.1	1.45	1.43	Complement component C8 alpha chain OS=Homo sapiens OX=9606 GN=C8A PE=1 SV=2
sp|P07996|TSP1_HUMAN	29930000	48300000	42850000	28850000	26300000	38940000	1	1.61	1.43	0.96	0.88	1.3	Thrombospondin-1 OS=Homo sapiens OX=9606 GN=THBS1 PE=1 SV=2
sp|Q9Y490|TLN1_HUMAN	27970000	26290000	19980000	13990000	16350000	22630000	1	0.94	0.71	0.5	0.58	0.81	Talin-1 OS=Homo sapiens OX=9606 GN=TLN1 PE=1 SV=3
Q5T985|Q5T985_HUMAN	166900000	122100000	147700000	110600000	96370000	137000000	1	0.73	0.88	0.66	0.58	0.82	Inter-alpha-trypsin inhibitor heavy chain H2 OS=Homo sapiens OX=9606 GN=ITIH2 PE=1 SV=1
sp|P19823|ITIH2_HUMAN	166900000	122100000	147700000	110600000	96370000	137000000	1	0.73	0.88	0.66	0.58	0.82	Inter-alpha-trypsin inhibitor heavy chain H2 OS=Homo sapiens OX=9606 GN=ITIH2 PE=1 SV=2
sp|P00739|HPTR_HUMAN	1819000	3031000	2024000	2984000	3259000	3401000	1	1.67	1.11	1.64	1.79	1.87	Haptoglobin-related protein OS=Homo sapiens OX=9606 GN=HPR PE=2 SV=2
sp|P07358|CO8B_HUMAN	41790000	52250000	45050000	39020000	55020000	49580000	1	1.25	1.08	0.93	1.32	1.19	Complement component C8 beta chain OS=Homo sapiens OX=9606 GN=C8B PE=1 SV=3
F5GY80|F5GY80_HUMAN	41790000	52250000	45050000	39020000	55020000	49580000	1	1.25	1.08	0.93	1.32	1.19	Complement component 8 subunit beta OS=Homo sapiens OX=9606 GN=C8B PE=1 SV=1
F5H7G1|F5H7G1_HUMAN	41790000	52250000	45050000	39020000	55020000	49580000	1	1.25	1.08	0.93	1.32	1.19	Complement component 8 subunit beta OS=Homo sapiens OX=9606 GN=C8B PE=1 SV=1
sp|P10643|CO7_HUMAN	33130000	38360000	34610000	29280000	41160000	37110000	1	1.16	1.04	0.88	1.24	1.12	Complement component C7 OS=Homo sapiens OX=9606 GN=C7 PE=1 SV=2
sp|P35527|K1C9_HUMAN	72720000	113300000	73470000	77490000	119500000	127400000	1	1.56	1.01	1.07	1.64	1.75	Keratin type I cytoskeletal 9 OS=Homo sapiens OX=9606 GN=KRT9 PE=1 SV=3
sp|P02760|AMBP_HUMAN	28800000	28180000	29630000	31350000	29500000	29360000	1	0.98	1.03	1.09	1.02	1.02	Protein AMBP OS=Homo sapiens OX=9606 GN=AMBP PE=1 SV=1
sp|P02533|K1C14_HUMAN	2731000	5391000	2651000	3048000	4440000	4257000	1	1.97	0.97	1.12	1.63	1.56	Keratin type I cytoskeletal 14 OS=Homo sapiens OX=9606 GN=KRT14 PE=1 SV=4
sp|P26927|HGFL_HUMAN	20330000	28110000	21060000	23870000	22330000	25220000	1	1.38	1.04	1.17	1.1	1.24	Hepatocyte growth factor-like protein OS=Homo sapiens OX=9606 GN=MST1 PE=1 SV=2
G3XAK1|G3XAK1_HUMAN	20330000	28110000	21060000	23870000	22330000	25220000	1	1.38	1.04	1.17	1.1	1.24	Hepatocyte growth factor-like protein OS=Homo sapiens OX=9606 GN=MST1 PE=1 SV=1
sp|P02790|HEMO_HUMAN	533400000	435400000	553900000	508100000	434600000	450700000	1	0.82	1.04	0.95	0.81	0.84	Hemopexin OS=Homo sapiens OX=9606 GN=HPX PE=1 SV=2
sp|P08779|K1C16_HUMAN	3484000	5791000	2799000	5227000	4374000	8550000	1	1.66	0.8	1.5	1.26	2.45	Keratin type I cytoskeletal 16 OS=Homo sapiens OX=9606 GN=KRT16 PE=1 SV=4
sp|P00488|F13A_HUMAN	44700000	35860000	43340000	42810000	46580000	59950000	1	0.8	0.97	0.96	1.04	1.34	Coagulation factor XIII A chain OS=Homo sapiens OX=9606 GN=F13A1 PE=1 SV=4
sp|P25311|ZA2G_HUMAN	31970000	38760000	35240000	30940000	50520000	33030000	1	1.21	1.1	0.97	1.58	1.03	Zinc-alpha-2-glycoprotein OS=Homo sapiens OX=9606 GN=AZGP1 PE=1 SV=2
A0A0A0MS08|A0A0A0MS08_HUMAN	807700000	2352000000	900700000	675000000	603700000	881600000	1	2.91	1.12	0.84	0.75	1.09	Immunoglobulin heavy constant gamma 1 (Fragment) OS=Homo sapiens OX=9606 GN=IGHG1 PE=1 SV=1
sp|P01857|IGHG1_HUMAN	807700000	2352000000	900700000	675000000	603700000	881600000	1	2.91	1.12	0.84	0.75	1.09	Immunoglobulin heavy constant gamma 1 OS=Homo sapiens OX=9606 GN=IGHG1 PE=1 SV=1
sp|P19827|ITIH1_HUMAN	78730000	53630000	61830000	53220000	47300000	58830000	1	0.68	0.79	0.68	0.6	0.75	Inter-alpha-trypsin inhibitor heavy chain H1 OS=Homo sapiens OX=9606 GN=ITIH1 PE=1 SV=3
sp|Q03591|FHR1_HUMAN	13770000	17360000	17360000	31770000	28960000	21020000	1	1.26	1.26	2.31	2.1	1.53	Complement factor H-related protein 1 OS=Homo sapiens OX=9606 GN=CFHR1 PE=1 SV=2
sp|P00736|C1R_HUMAN	80220000	76240000	75100000	72660000	82160000	77590000	1	0.95	0.94	0.91	1.02	0.97	Complement C1r subcomponent OS=Homo sapiens OX=9606 GN=C1R PE=1 SV=2
A0A3B3ISR2|A0A3B3ISR2_HUMAN	80220000	76240000	75100000	72660000	82160000	77590000	1	0.95	0.94	0.91	1.02	0.97	Complement subcomponent C1r OS=Homo sapiens OX=9606 GN=C1R PE=1 SV=1
B4DPQ0|B4DPQ0_HUMAN	80220000	76240000	75100000	72660000	82160000	77590000	1	0.95	0.94	0.91	1.02	0.97	Complement subcomponent C1r OS=Homo sapiens OX=9606 GN=C1R PE=1 SV=1
G3XAM2|G3XAM2_HUMAN	36400000	41340000	34830000	37100000	42060000	32180000	1	1.14	0.96	1.02	1.16	0.88	Complement factor I OS=Homo sapiens OX=9606 GN=CFI PE=1 SV=1
sp|P05156|CFAI_HUMAN	36400000	41340000	34830000	37100000	42060000	32180000	1	1.14	0.96	1.02	1.16	0.88	Complement factor I OS=Homo sapiens OX=9606 GN=CFI PE=1 SV=2
E7ETH0|E7ETH0_HUMAN	36400000	41340000	34830000	37100000	42060000	32180000	1	1.14	0.96	1.02	1.16	0.88	Complement factor I OS=Homo sapiens OX=9606 GN=CFI PE=1 SV=1
E9PEV4|E9PEV4_HUMAN	137500	241400	176800	186500	248500	177400	1	1.76	1.29	1.36	1.81	1.29	Apolipoprotein E (Fragment) OS=Homo sapiens OX=9606 GN=APOE PE=1 SV=1
sp|Q9BXR6|FHR5_HUMAN	12530000	20050000	13870000	16150000	19970000	20800000	1	1.6	1.11	1.29	1.59	1.66	Complement factor H-related protein 5 OS=Homo sapiens OX=9606 GN=CFHR5 PE=1 SV=1
A0A087X232|A0A087X232_HUMAN	27180000	38770000	34670000	27720000	30920000	31420000	1	1.43	1.28	1.02	1.14	1.16	Complement C1s subcomponent OS=Homo sapiens OX=9606 GN=C1S PE=1 SV=1
sp|P09871|C1S_HUMAN	27180000	38770000	34670000	27720000	30920000	31420000	1	1.43	1.28	1.02	1.14	1.16	Complement C1s subcomponent OS=Homo sapiens OX=9606 GN=C1S PE=1 SV=1
sp|O43866|CD5L_HUMAN	55470000	62960000	53780000	81650000	88150000	77570000	1	1.13	0.97	1.47	1.59	1.4	CD5 antigen-like OS=Homo sapiens OX=9606 GN=CD5L PE=1 SV=1
sp|P27918|PROP_HUMAN	92830000	127800000	98260000	125900000	118000000	131800000	1	1.38	1.06	1.36	1.27	1.42	Properdin OS=Homo sapiens OX=9606 GN=CFP PE=1 SV=2
sp|P23142|FBLN1_HUMAN	9128000	14150000	9842000	14350000	13900000	14820000	1	1.55	1.08	1.57	1.52	1.62	Fibulin-1 OS=Homo sapiens OX=9606 GN=FBLN1 PE=1 SV=4
sp|P04196|HRG_HUMAN	93630000	111900000	106000000	99880000	100100000	90100000	1	1.19	1.13	1.07	1.07	0.96	Histidine-rich glycoprotein OS=Homo sapiens OX=9606 GN=HRG PE=1 SV=1
sp|P04259|K2C6B_HUMAN	1267000	1400000	1522000	1405000	1761000	2622000	1	1.1	1.2	1.11	1.39	2.07	Keratin type II cytoskeletal 6B OS=Homo sapiens OX=9606 GN=KRT6B PE=1 SV=5
sp|P12259|FA5_HUMAN	14660000	16090000	14910000	11890000	16760000	14630000	1	1.1	1.02	0.81	1.14	1	Coagulation factor V OS=Homo sapiens OX=9606 GN=F5 PE=1 SV=4
A0A0A0MRJ7|A0A0A0MRJ7_HUMAN	14660000	16090000	14910000	11890000	16760000	14630000	1	1.1	1.02	0.81	1.14	1	Coagulation factor V OS=Homo sapiens OX=9606 GN=F5 PE=1 SV=1
sp|P35555|FBN1_HUMAN	11460000	12940000	11290000	12300000	12400000	12120000	1	1.13	0.99	1.07	1.08	1.06	Fibrillin-1 OS=Homo sapiens OX=9606 GN=FBN1 PE=1 SV=4
sp|Q16610|ECM1_HUMAN	46830000	53370000	50840000	68670000	54470000	60820000	1	1.14	1.09	1.47	1.16	1.3	Extracellular matrix protein 1 OS=Homo sapiens OX=9606 GN=ECM1 PE=1 SV=2
C9JVG0|C9JVG0_HUMAN	185500	248800	261300	405500	284000	326100	1	1.34	1.41	2.19	1.53	1.76	Serotransferrin (Fragment) OS=Homo sapiens OX=9606 GN=TF PE=1 SV=1
sp|P06396|GELS_HUMAN	31130000	27720000	31180000	25460000	24470000	29770000	1	0.89	1	0.82	0.79	0.96	Gelsolin OS=Homo sapiens OX=9606 GN=GSN PE=1 SV=1
A0A0A0MT01|A0A0A0MT01_HUMAN	31130000	27720000	31180000	25460000	24470000	29770000	1	0.89	1	0.82	0.79	0.96	Actin-depolymerizing factor OS=Homo sapiens OX=9606 GN=GSN PE=1 SV=1
A0A0A0MS51|A0A0A0MS51_HUMAN	31130000	27720000	31180000	25460000	24470000	29770000	1	0.89	1	0.82	0.79	0.96	Actin-depolymerizing factor OS=Homo sapiens OX=9606 GN=GSN PE=1 SV=1
sp|Q14624|ITIH4_HUMAN	61880000	65380000	67530000	49330000	57380000	53350000	1	1.06	1.09	0.8	0.93	0.86	Inter-alpha-trypsin inhibitor heavy chain H4 OS=Homo sapiens OX=9606 GN=ITIH4 PE=1 SV=4
B7ZKJ8|B7ZKJ8_HUMAN	61880000	65380000	67530000	49330000	57380000	53350000	1	1.06	1.09	0.8	0.93	0.86	ITIH4 protein OS=Homo sapiens OX=9606 GN=ITIH4 PE=1 SV=1
sp|P01009|A1AT_HUMAN	812800000	1323000000	1024000000	1050000000	775100000	896000000	1	1.63	1.26	1.29	0.95	1.1	Alpha-1-antitrypsin OS=Homo sapiens OX=9606 GN=SERPINA1 PE=1 SV=3
sp|P11021|BIP_HUMAN	18830000	23010000	19730000	19990000	26330000	23190000	1	1.22	1.05	1.06	1.4	1.23	Endoplasmic reticulum chaperone BiP OS=Homo sapiens OX=9606 GN=HSPA5 PE=1 SV=2
sp|P01011|AACT_HUMAN	186000000	204700000	186600000	153200000	177600000	146700000	1	1.1	1	0.82	0.95	0.79	Alpha-1-antichymotrypsin OS=Homo sapiens OX=9606 GN=SERPINA3 PE=1 SV=2
B1AHL2|B1AHL2_HUMAN	1914000	2576000	2288000	2794000	1985000	3178000	1	1.35	1.2	1.46	1.04	1.66	Fibulin-1 OS=Homo sapiens OX=9606 GN=FBLN1 PE=1 SV=1
sp|Q14520|HABP2_HUMAN	22410000	20650000	21710000	19620000	23230000	23470000	1	0.92	0.97	0.88	1.04	1.05	Hyaluronan-binding protein 2 OS=Homo sapiens OX=9606 GN=HABP2 PE=1 SV=1
sp|O14791|APOL1_HUMAN	58760000	79020000	57390000	91240000	73390000	78590000	1	1.34	0.98	1.55	1.25	1.34	Apolipoprotein L1 OS=Homo sapiens OX=9606 GN=APOL1 PE=1 SV=5
sp|P08697|A2AP_HUMAN	34920000	42910000	38000000	34370000	45540000	37250000	1	1.23	1.09	0.98	1.3	1.07	Alpha-2-antiplasmin OS=Homo sapiens OX=9606 GN=SERPINF2 PE=1 SV=3
sp|P10909|CLUS_HUMAN	207100000	229400000	217200000	211300000	287700000	224000000	1	1.11	1.05	1.02	1.39	1.08	Clusterin OS=Homo sapiens OX=9606 GN=CLU PE=1 SV=1
sp|P48740|MASP1_HUMAN	18240000	21370000	17850000	16180000	23750000	19180000	1	1.17	0.98	0.89	1.3	1.05	Mannan-binding lectin serine protease 1 OS=Homo sapiens OX=9606 GN=MASP1 PE=1 SV=3
sp|O75882|ATRN_HUMAN	20950000	18470000	20120000	18540000	19870000	18390000	1	0.88	0.96	0.88	0.95	0.88	Attractin OS=Homo sapiens OX=9606 GN=ATRN PE=1 SV=2
sp|P05090|APOD_HUMAN	94500000	103700000	99850000	81230000	158900000	84030000	1	1.1	1.06	0.86	1.68	0.89	Apolipoprotein D OS=Homo sapiens OX=9606 GN=APOD PE=1 SV=1
C9JF17|C9JF17_HUMAN	94500000	103700000	99850000	81230000	158900000	84030000	1	1.1	1.06	0.86	1.68	0.89	Apolipoprotein D (Fragment) OS=Homo sapiens OX=9606 GN=APOD PE=1 SV=1
sp|P15924|DESP_HUMAN	8193000	12890000	8804000	8654000	13230000	12550000	1	1.57	1.07	1.06	1.61	1.53	Desmoplakin OS=Homo sapiens OX=9606 GN=DSP PE=1 SV=3
sp|P01861|IGHG4_HUMAN	30450000	41630000	40590000	21310000	20890000	27590000	1	1.37	1.33	0.7	0.69	0.91	Immunoglobulin heavy constant gamma 4 OS=Homo sapiens OX=9606 GN=IGHG4 PE=1 SV=1
A0A286YFJ8|A0A286YFJ8_HUMAN	30450000	41630000	40590000	21310000	20890000	27590000	1	1.37	1.33	0.7	0.69	0.91	Immunoglobulin heavy constant gamma 4 (Fragment) OS=Homo sapiens OX=9606 GN=IGHG4 PE=1 SV=1
V9GYE7|V9GYE7_HUMAN	18150000	23810000	11840000	19090000	23360000	38350000	1	1.31	0.65	1.05	1.29	2.11	Complement factor H-related protein 2 OS=Homo sapiens OX=9606 GN=CFHR2 PE=1 SV=1
sp|P36980|FHR2_HUMAN	18150000	23810000	11840000	19090000	23360000	38350000	1	1.31	0.65	1.05	1.29	2.11	Complement factor H-related protein 2 OS=Homo sapiens OX=9606 GN=CFHR2 PE=1 SV=1
A0A3B3IQ51|A0A3B3IQ51_HUMAN	18150000	23810000	11840000	19090000	23360000	38350000	1	1.31	0.65	1.05	1.29	2.11	Complement factor H-related protein 2 OS=Homo sapiens OX=9606 GN=CFHR2 PE=1 SV=1
sp|Q04695|K1C17_HUMAN	768400	1551000	828600	1222000	1184000	1021000	1	2.02	1.08	1.59	1.54	1.33	Keratin type I cytoskeletal 17 OS=Homo sapiens OX=9606 GN=KRT17 PE=1 SV=2
sp|P01876|IGHA1_HUMAN	39440000	56260000	34720000	40490000	44350000	53850000	1	1.43	0.88	1.03	1.12	1.37	Immunoglobulin heavy constant alpha 1 OS=Homo sapiens OX=9606 GN=IGHA1 PE=1 SV=2
A0A286YEY1|A0A286YEY1_HUMAN	39440000	56260000	34720000	40490000	44350000	53850000	1	1.43	0.88	1.03	1.12	1.37	Immunoglobulin heavy constant alpha 1 (Fragment) OS=Homo sapiens OX=9606 GN=IGHA1 PE=1 SV=1
A0A286YEY4|A0A286YEY4_HUMAN	530900000	481300000	574000000	453900000	488600000	611000000	1	0.91	1.08	0.85	0.92	1.15	Immunoglobulin heavy constant gamma 2 (Fragment) OS=Homo sapiens OX=9606 GN=IGHG2 PE=1 SV=1
sp|P01859|IGHG2_HUMAN	530900000	481300000	574000000	453900000	488600000	611000000	1	0.91	1.08	0.85	0.92	1.15	Immunoglobulin heavy constant gamma 2 OS=Homo sapiens OX=9606 GN=IGHG2 PE=1 SV=2
sp|P02749|APOH_HUMAN	73670000	68530000	62090000	78550000	84850000	59020000	1	0.93	0.84	1.07	1.15	0.8	Beta-2-glycoprotein 1 OS=Homo sapiens OX=9606 GN=APOH PE=1 SV=3
sp|P00748|FA12_HUMAN	13070000	19490000	20870000	18100000	20490000	15530000	1	1.49	1.6	1.38	1.57	1.19	Coagulation factor XII OS=Homo sapiens OX=9606 GN=F12 PE=1 SV=3
sp|P98160|PGBM_HUMAN	4897000	5182000	5181000	5166000	6162000	6166000	1	1.06	1.06	1.05	1.26	1.26	Basement membrane-specific heparan sulfate proteoglycan core protein OS=Homo sapiens OX=9606 GN=HSPG2 PE=1 SV=4
sp|P18206|VINC_HUMAN	10170000	13760000	7965000	9052000	10410000	10430000	1	1.35	0.78	0.89	1.02	1.03	Vinculin OS=Homo sapiens OX=9606 GN=VCL PE=1 SV=4
sp|P03951|FA11_HUMAN	8627000	9470000	8597000	9046000	11800000	10470000	1	1.1	1	1.05	1.37	1.21	Coagulation factor XI OS=Homo sapiens OX=9606 GN=F11 PE=1 SV=1
sp|P21333|FLNA_HUMAN	6255000	6621000	4904000	4155000	5148000	4818000	1	1.06	0.78	0.66	0.82	0.77	Filamin-A OS=Homo sapiens OX=9606 GN=FLNA PE=1 SV=4
Q60FE5|Q60FE5_HUMAN	6255000	6621000	4904000	4155000	5148000	4818000	1	1.06	0.78	0.66	0.82	0.77	Filamin-A OS=Homo sapiens OX=9606 GN=FLNA PE=1 SV=1
sp|P68871|HBB_HUMAN	128800000	176100000	159400000	232100000	251700000	211200000	1	1.37	1.24	1.8	1.95	1.64	Hemoglobin subunit beta OS=Homo sapiens OX=9606 GN=HBB PE=1 SV=2
sp|P04217|A1BG_HUMAN	20530000	17640000	29910000	16610000	20640000	17890000	1	0.86	1.46	0.81	1.01	0.87	Alpha-1B-glycoprotein OS=Homo sapiens OX=9606 GN=A1BG PE=1 SV=4
A0A7I2V2D2|A0A7I2V2D2_HUMAN	105700000	124500000	109900000	74500000	98150000	79410000	1	1.18	1.04	0.71	0.93	0.75	Plasma protease C1 inhibitor OS=Homo sapiens OX=9606 GN=SERPING1 PE=1 SV=1
sp|P05155|IC1_HUMAN	105700000	124500000	109900000	74500000	98150000	79410000	1	1.18	1.04	0.71	0.93	0.75	Plasma protease C1 inhibitor OS=Homo sapiens OX=9606 GN=SERPING1 PE=1 SV=2
E9PGN7|E9PGN7_HUMAN	105700000	124500000	109900000	74500000	98150000	79410000	1	1.18	1.04	0.71	0.93	0.75	Plasma protease C1 inhibitor OS=Homo sapiens OX=9606 GN=SERPING1 PE=1 SV=1
D6RAR4|D6RAR4_HUMAN	7305000	8119000	7316000	5778000	7292000	6493000	1	1.11	1	0.79	1	0.89	Hepatocyte growth factor activator OS=Homo sapiens OX=9606 GN=HGFAC PE=1 SV=1
sp|Q04756|HGFA_HUMAN	7305000	8119000	7316000	5778000	7292000	6493000	1	1.11	1	0.79	1	0.89	Hepatocyte growth factor activator OS=Homo sapiens OX=9606 GN=HGFAC PE=1 SV=1
I3L4N8|I3L4N8_HUMAN	14500000	17920000	11680000	10840000	17200000	20650000	1	1.24	0.81	0.75	1.19	1.42	Actin cytoplasmic 2 OS=Homo sapiens OX=9606 GN=ACTG1 PE=1 SV=9
sp|P60709|ACTB_HUMAN	14500000	17920000	11680000	10840000	17200000	20650000	1	1.24	0.81	0.75	1.19	1.42	Actin cytoplasmic 1 OS=Homo sapiens OX=9606 GN=ACTB PE=1 SV=1
sp|P63261|ACTG_HUMAN	14500000	17920000	11680000	10840000	17200000	20650000	1	1.24	0.81	0.75	1.19	1.42	Actin cytoplasmic 2 OS=Homo sapiens OX=9606 GN=ACTG1 PE=1 SV=1
sp|P02730|B3AT_HUMAN	10140000	12640000	9359000	15190000	26700000	21570000	1	1.25	0.92	1.5	2.63	2.13	Band 3 anion transport protein OS=Homo sapiens OX=9606 GN=SLC4A1 PE=1 SV=3
sp|P04040|CATA_HUMAN	5694000	7543000	6448000	8431000	12080000	10330000	1	1.32	1.13	1.48	2.12	1.81	Catalase OS=Homo sapiens OX=9606 GN=CAT PE=1 SV=3
sp|P04004|VTNC_HUMAN	96760000	96430000	85740000	69010000	99390000	76150000	1	1	0.89	0.71	1.03	0.79	Vitronectin OS=Homo sapiens OX=9606 GN=VTN PE=1 SV=1
A0A4W8ZXM2|A0A4W8ZXM2_HUMAN	8502000	8917000	8705000	10030000	7764000	10240000	1	1.05	1.02	1.18	0.91	1.2	Immunoglobulin heavy variable 3-72 OS=Homo sapiens OX=9606 GN=IGHV3-72 PE=1 SV=1
sp|O75636|FCN3_HUMAN	31000000	30690000	29070000	33120000	56640000	38300000	1	0.99	0.94	1.07	1.83	1.24	Ficolin-3 OS=Homo sapiens OX=9606 GN=FCN3 PE=1 SV=2
sp|O00187|MASP2_HUMAN	6652000	11150000	7567000	6988000	8661000	7636000	1	1.68	1.14	1.05	1.3	1.15	Mannan-binding lectin serine protease 2 OS=Homo sapiens OX=9606 GN=MASP2 PE=1 SV=4
sp|P05546|HEP2_HUMAN	60740000	50570000	57950000	40780000	41690000	42970000	1	0.83	0.95	0.67	0.69	0.71	Heparin cofactor 2 OS=Homo sapiens OX=9606 GN=SERPIND1 PE=1 SV=3
sp|P02775|CXCL7_HUMAN	30120000	46620000	27440000	27060000	28630000	31820000	1	1.55	0.91	0.9	0.95	1.06	Platelet basic protein OS=Homo sapiens OX=9606 GN=PPBP PE=1 SV=3
A0A5H1ZRQ7|A0A5H1ZRQ7_HUMAN	8955000	7934000	6972000	12990000	10780000	11390000	1	0.89	0.78	1.45	1.2	1.27	Immunoglobulin lambda constant 7 (Fragment) OS=Homo sapiens OX=9606 GN=IGLC7 PE=1 SV=1
sp|A0M8Q6|IGLC7_HUMAN	8955000	7934000	6972000	12990000	10780000	11390000	1	0.89	0.78	1.45	1.2	1.27	Immunoglobulin lambda constant 7 OS=Homo sapiens OX=9606 GN=IGLC7 PE=1 SV=3
sp|P05543|THBG_HUMAN	13050000	15400000	14880000	12630000	11200000	12440000	1	1.18	1.14	0.97	0.86	0.95	Thyroxine-binding globulin OS=Homo sapiens OX=9606 GN=SERPINA7 PE=1 SV=2
sp|P02765|FETUA_HUMAN	300300000	312400000	337900000	337100000	287200000	292000000	1	1.04	1.13	1.12	0.96	0.97	Alpha-2-HS-glycoprotein OS=Homo sapiens OX=9606 GN=AHSG PE=1 SV=2
sp|P00742|FA10_HUMAN	9113000	13010000	9866000	7462000	15350000	7570000	1	1.43	1.08	0.82	1.68	0.83	Coagulation factor X OS=Homo sapiens OX=9606 GN=F10 PE=1 SV=2
A0A3B3ISX9|A0A3B3ISX9_HUMAN	5585000	6218000	7728000	5706000	5960000	7266000	1	1.11	1.38	1.02	1.07	1.3	Tenascin-X OS=Homo sapiens OX=9606 GN=TNXB PE=1 SV=1
sp|P01591|IGJ_HUMAN	106700000	134600000	89270000	131100000	183900000	126800000	1	1.26	0.84	1.23	1.72	1.19	Immunoglobulin J chain OS=Homo sapiens OX=9606 GN=JCHAIN PE=1 SV=4
sp|Q96PD5|PGRP2_HUMAN	15530000	13480000	14260000	13130000	11880000	13120000	1	0.87	0.92	0.85	0.76	0.84	N-acetylmuramoyl-L-alanine amidase OS=Homo sapiens OX=9606 GN=PGLYRP2 PE=1 SV=1
K7ERI9|K7ERI9_HUMAN	914700000	544300000	572900000	693900000	644700000	450900000	1	0.6	0.63	0.76	0.7	0.49	Apolipoprotein C-I (Fragment) OS=Homo sapiens OX=9606 GN=APOC1 PE=1 SV=1
sp|P02654|APOC1_HUMAN	914700000	544300000	572900000	693900000	644700000	450900000	1	0.6	0.63	0.76	0.7	0.49	Apolipoprotein C-I OS=Homo sapiens OX=9606 GN=APOC1 PE=1 SV=1
sp|P02748|CO9_HUMAN	11940000	16630000	14590000	10330000	16040000	15560000	1	1.39	1.22	0.87	1.34	1.3	Complement component C9 OS=Homo sapiens OX=9606 GN=C9 PE=1 SV=2
sp|P69905|HBA_HUMAN	365900000	465700000	481700000	823000000	876000000	656400000	1	1.27	1.32	2.25	2.39	1.79	Hemoglobin subunit alpha OS=Homo sapiens OX=9606 GN=HBA2 PE=1 SV=2
sp|P02743|SAMP_HUMAN	11890000	44590000	13800000	19050000	15430000	15470000	1	3.75	1.16	1.6	1.3	1.3	Serum amyloid P-component OS=Homo sapiens OX=9606 GN=APCS PE=1 SV=2
sp|P02656|APOC3_HUMAN	64680000	47610000	40610000	90360000	77720000	52970000	1	0.74	0.63	1.4	1.2	0.82	Apolipoprotein C-III OS=Homo sapiens OX=9606 GN=APOC3 PE=1 SV=1
B0YIW2|B0YIW2_HUMAN	64680000	47610000	40610000	90360000	77720000	52970000	1	0.74	0.63	1.4	1.2	0.82	Apolipoprotein C-III OS=Homo sapiens OX=9606 GN=APOC3 PE=1 SV=1
A0A087WXI2|A0A087WXI2_HUMAN	4813000	6999000	4688000	6788000	5819000	5384000	1	1.45	0.97	1.41	1.21	1.12	IgGFc-binding protein OS=Homo sapiens OX=9606 GN=FCGBP PE=1 SV=3
sp|Q9Y6R7|FCGBP_HUMAN	4813000	6999000	4688000	6788000	5819000	5384000	1	1.45	0.97	1.41	1.21	1.12	IgGFc-binding protein OS=Homo sapiens OX=9606 GN=FCGBP PE=1 SV=3
A0A087WSY5|A0A087WSY5_HUMAN	3401000	3806000	3244000	3567000	4324000	3795000	1	1.12	0.95	1.05	1.27	1.12	Carboxypeptidase B2 OS=Homo sapiens OX=9606 GN=CPB2 PE=1 SV=1
sp|Q96IY4|CBPB2_HUMAN	3401000	3806000	3244000	3567000	4324000	3795000	1	1.12	0.95	1.05	1.27	1.12	Carboxypeptidase B2 OS=Homo sapiens OX=9606 GN=CPB2 PE=1 SV=2
sp|P16157|ANK1_HUMAN	3878000	5397000	3582000	4998000	11230000	8159000	1	1.39	0.92	1.29	2.9	2.1	Ankyrin-1 OS=Homo sapiens OX=9606 GN=ANK1 PE=1 SV=3
sp|P20851|C4BPB_HUMAN	361300000	425100000	360400000	487900000	619300000	487800000	1	1.18	1	1.35	1.71	1.35	C4b-binding protein beta chain OS=Homo sapiens OX=9606 GN=C4BPB PE=1 SV=1
C9JB55|C9JB55_HUMAN	1052000	1260000	1122000	1284000	903800	982600	1	1.2	1.07	1.22	0.86	0.93	Serotransferrin (Fragment) OS=Homo sapiens OX=9606 GN=TF PE=1 SV=8
sp|Q12805|FBLN3_HUMAN	9543000	11750000	9359000	10320000	10520000	11690000	1	1.23	0.98	1.08	1.1	1.22	EGF-containing fibulin-like extracellular matrix protein 1 OS=Homo sapiens OX=9606 GN=EFEMP1 PE=1 SV=2
sp|Q96KN2|CNDP1_HUMAN	3255000	4143000	3999000	4839000	5976000	5206000	1	1.27	1.23	1.49	1.84	1.6	Beta-Ala-His dipeptidase OS=Homo sapiens OX=9606 GN=CNDP1 PE=1 SV=4
J3KRP0|J3KRP0_HUMAN	3255000	4143000	3999000	4839000	5976000	5206000	1	1.27	1.23	1.49	1.84	1.6	Beta-Ala-His dipeptidase OS=Homo sapiens OX=9606 GN=CNDP1 PE=1 SV=2
sp|Q06033|ITIH3_HUMAN	9887000	17180000	13290000	10120000	14710000	12570000	1	1.74	1.34	1.02	1.49	1.27	Inter-alpha-trypsin inhibitor heavy chain H3 OS=Homo sapiens OX=9606 GN=ITIH3 PE=1 SV=2
sp|P02042|HBD_HUMAN	10280000	12420000	11710000	15440000	16070000	14870000	1	1.21	1.14	1.5	1.56	1.45	Hemoglobin subunit delta OS=Homo sapiens OX=9606 GN=HBD PE=1 SV=2
sp|Q15582|BGH3_HUMAN	7114000	7877000	7414000	8367000	7819000	8786000	1	1.11	1.04	1.18	1.1	1.24	Transforming growth factor-beta-induced protein ig-h3 OS=Homo sapiens OX=9606 GN=TGFBI PE=1 SV=1
sp|Q9NZP8|C1RL_HUMAN	8277000	8464000	8718000	6674000	7826000	7823000	1	1.02	1.05	0.81	0.95	0.95	Complement C1r subcomponent-like protein OS=Homo sapiens OX=9606 GN=C1RL PE=1 SV=2
sp|Q14766|LTBP1_HUMAN	2678000	3606000	2874000	2222000	2592000	2989000	1	1.35	1.07	0.83	0.97	1.12	Latent-transforming growth factor beta-binding protein 1 OS=Homo sapiens OX=9606 GN=LTBP1 PE=1 SV=4
E9PG08|E9PG08_HUMAN	7026000	8814000	8701000	7579000	7699000	8072000	1	1.25	1.24	1.08	1.1	1.15	Fetuin-B OS=Homo sapiens OX=9606 GN=FETUB PE=1 SV=1
sp|Q9UGM5|FETUB_HUMAN	7026000	8814000	8701000	7579000	7699000	8072000	1	1.25	1.24	1.08	1.1	1.15	Fetuin-B OS=Homo sapiens OX=9606 GN=FETUB PE=1 SV=2
sp|P01877|IGHA2_HUMAN	1660000	1069000	1059000	1039000	880900	1223000	1	0.64	0.64	0.63	0.53	0.74	Immunoglobulin heavy constant alpha 2 OS=Homo sapiens OX=9606 GN=IGHA2 PE=1 SV=4
A0A286YEY5|A0A286YEY5_HUMAN	1660000	1069000	1059000	1039000	880900	1223000	1	0.64	0.64	0.63	0.53	0.74	Immunoglobulin heavy constant alpha 2 (Fragment) OS=Homo sapiens OX=9606 GN=IGHA2 PE=1 SV=1
sp|O43790|KRT86_HUMAN	4352000	5805000	5437000	5130000	19800000	6095000	1	1.33	1.25	1.18	4.55	1.4	Keratin type II cuticular Hb6 OS=Homo sapiens OX=9606 GN=KRT86 PE=1 SV=1
A0A087X106|A0A087X106_HUMAN	4352000	5805000	5437000	5130000	19800000	6095000	1	1.33	1.25	1.18	4.55	1.4	Keratin type II cuticular Hb1 OS=Homo sapiens OX=9606 GN=KRT81 PE=1 SV=1
sp|Q14533|KRT81_HUMAN	4352000	5805000	5437000	5130000	19800000	6095000	1	1.33	1.25	1.18	4.55	1.4	Keratin type II cuticular Hb1 OS=Homo sapiens OX=9606 GN=KRT81 PE=1 SV=3
sp|P05106|ITB3_HUMAN	5371000	7394000	4216000	3593000	6114000	6493000	1	1.38	0.78	0.67	1.14	1.21	Integrin beta-3 OS=Homo sapiens OX=9606 GN=ITGB3 PE=1 SV=2
sp|P35579|MYH9_HUMAN	2690000	3337000	1948000	1860000	2633000	2679000	1	1.24	0.72	0.69	0.98	1	Myosin-9 OS=Homo sapiens OX=9606 GN=MYH9 PE=1 SV=4
E7ENL6|E7ENL6_HUMAN	5414000	5502000	5732000	7146000	6640000	7036000	1	1.02	1.06	1.32	1.23	1.3	Collagen alpha-3(VI) chain OS=Homo sapiens OX=9606 GN=COL6A3 PE=1 SV=2
sp|P36955|PEDF_HUMAN	8539000	8915000	8579000	9948000	7680000	9387000	1	1.04	1	1.17	0.9	1.1	Pigment epithelium-derived factor OS=Homo sapiens OX=9606 GN=SERPINF1 PE=1 SV=4
E9PKE3|E9PKE3_HUMAN	2759000	3008000	2526000	2105000	2942000	2823000	1	1.09	0.92	0.76	1.07	1.02	Heat shock cognate 71 kDa protein OS=Homo sapiens OX=9606 GN=HSPA8 PE=1 SV=1
sp|P11142|HSP7C_HUMAN	2759000	3008000	2526000	2105000	2942000	2823000	1	1.09	0.92	0.76	1.07	1.02	Heat shock cognate 71 kDa protein OS=Homo sapiens OX=9606 GN=HSPA8 PE=1 SV=1
sp|P19652|A1AG2_HUMAN	45520000	49830000	39670000	22480000	27420000	20450000	1	1.09	0.87	0.49	0.6	0.45	Alpha-1-acid glycoprotein 2 OS=Homo sapiens OX=9606 GN=ORM2 PE=1 SV=2
sp|P05452|TETN_HUMAN	7091000	6469000	7059000	6452000	5140000	6030000	1	0.91	1	0.91	0.72	0.85	Tetranectin OS=Homo sapiens OX=9606 GN=CLEC3B PE=1 SV=3
sp|Q92954|PRG4_HUMAN	13200000	15010000	14140000	12090000	15380000	10860000	1	1.14	1.07	0.92	1.17	0.82	Proteoglycan 4 OS=Homo sapiens OX=9606 GN=PRG4 PE=1 SV=3
A0A087WWU8|A0A087WWU8_HUMAN	1281000	1512000	1019000	1123000	1930000	1582000	1	1.18	0.8	0.88	1.51	1.24	Tropomyosin alpha-3 chain OS=Homo sapiens OX=9606 GN=TPM3 PE=1 SV=1
J3QSU6|J3QSU6_HUMAN	4134000	5529000	5202000	4734000	6692000	5963000	1	1.34	1.26	1.14	1.62	1.44	Tenascin OS=Homo sapiens OX=9606 GN=TNC PE=1 SV=1
sp|P24821|TENA_HUMAN	4134000	5529000	5202000	4734000	6692000	5963000	1	1.34	1.26	1.14	1.62	1.44	Tenascin OS=Homo sapiens OX=9606 GN=TNC PE=1 SV=3
sp|P01019|ANGT_HUMAN	31530000	28140000	29710000	24620000	30190000	21380000	1	0.89	0.94	0.78	0.96	0.68	Angiotensinogen OS=Homo sapiens OX=9606 GN=AGT PE=1 SV=1
A0A7P0TBH1|A0A7P0TBH1_HUMAN	31530000	28140000	29710000	24620000	30190000	21380000	1	0.89	0.94	0.78	0.96	0.68	Angiotensinogen OS=Homo sapiens OX=9606 GN=AGT PE=4 SV=1
A0A7P0T8D1|A0A7P0T8D1_HUMAN	31530000	28140000	29710000	24620000	30190000	21380000	1	0.89	0.94	0.78	0.96	0.68	Angiotensinogen OS=Homo sapiens OX=9606 GN=AGT PE=4 SV=1
sp|Q8N1N4|K2C78_HUMAN	1607000	2263000	1721000	1675000	2710000	2474000	1	1.41	1.07	1.04	1.69	1.54	Keratin type II cytoskeletal 78 OS=Homo sapiens OX=9606 GN=KRT78 PE=1 SV=2
sp|P01833|PIGR_HUMAN	5281000	9079000	5976000	7141000	9793000	7915000	1	1.72	1.13	1.35	1.85	1.5	Polymeric immunoglobulin receptor OS=Homo sapiens OX=9606 GN=PIGR PE=1 SV=4
sp|P51884|LUM_HUMAN	13080000	13360000	17360000	13560000	12310000	13560000	1	1.02	1.33	1.04	0.94	1.04	Lumican OS=Homo sapiens OX=9606 GN=LUM PE=1 SV=2
sp|P12035|K2C3_HUMAN	5784000	3795000	5280000	1554000	4147000	7768000	1	0.66	0.91	0.27	0.72	1.34	Keratin type II cytoskeletal 3 OS=Homo sapiens OX=9606 GN=KRT3 PE=1 SV=3
A0A096LPE2|A0A096LPE2_HUMAN	33890000	35450000	30400000	40020000	64900000	29070000	1	1.05	0.9	1.18	1.91	0.86	SAA2-SAA4 readthrough OS=Homo sapiens OX=9606 GN=SAA2-SAA4 PE=3 SV=1
sp|Q08380|LG3BP_HUMAN	8098000	20650000	7753000	7949000	8250000	8655000	1	2.55	0.96	0.98	1.02	1.07	Galectin-3-binding protein OS=Homo sapiens OX=9606 GN=LGALS3BP PE=1 SV=1
sp|O95678|K2C75_HUMAN	87060	66240	72880	43980	101200	96880	1	0.76	0.84	0.51	1.16	1.11	Keratin type II cytoskeletal 75 OS=Homo sapiens OX=9606 GN=KRT75 PE=1 SV=2
A0A0B4J2B5|A0A0B4J2B5_HUMAN	1566000	2140000	1989000	2016000	1782000	3014000	1	1.37	1.27	1.29	1.14	1.92	Immunoglobulin heavy variable 3/OR16-9 (non-functional) (Fragment) OS=Homo sapiens OX=9606 GN=IGHV3OR16-9 PE=1 SV=1
B3KWK7|B3KWK7_HUMAN	7182000	6907000	9107000	8227000	6769000	7850000	1	0.96	1.27	1.15	0.94	1.09	Insulin-like growth factor binding protein 3 isoform CRA_b OS=Homo sapiens OX=9606 GN=IGFBP3 PE=1 SV=1
H0Y485|H0Y485_HUMAN	7182000	6907000	9107000	8227000	6769000	7850000	1	0.96	1.27	1.15	0.94	1.09	Insulin-like growth factor-binding protein 3 (Fragment) OS=Homo sapiens OX=9606 GN=IGFBP3 PE=1 SV=1
H0Y5K2|H0Y5K2_HUMAN	7182000	6907000	9107000	8227000	6769000	7850000	1	0.96	1.27	1.15	0.94	1.09	Insulin-like growth factor-binding protein 3 (Fragment) OS=Homo sapiens OX=9606 GN=IGFBP3 PE=1 SV=1
A6XND1|A6XND1_HUMAN	7182000	6907000	9107000	8227000	6769000	7850000	1	0.96	1.27	1.15	0.94	1.09	Insulin-like growth factor-binding protein 3 OS=Homo sapiens OX=9606 GN=IGFBP3 PE=1 SV=1
A6XND0|A6XND0_HUMAN	7182000	6907000	9107000	8227000	6769000	7850000	1	0.96	1.27	1.15	0.94	1.09	Insulin-like growth factor-binding protein 3 OS=Homo sapiens OX=9606 GN=IGFBP3 PE=1 SV=1
sp|P17936|IBP3_HUMAN	7182000	6907000	9107000	8227000	6769000	7850000	1	0.96	1.27	1.15	0.94	1.09	Insulin-like growth factor-binding protein 3 OS=Homo sapiens OX=9606 GN=IGFBP3 PE=1 SV=2
sp|P02747|C1QC_HUMAN	16410000	17550000	18930000	18840000	19550000	23510000	1	1.07	1.15	1.15	1.19	1.43	Complement C1q subcomponent subunit C OS=Homo sapiens OX=9606 GN=C1QC PE=1 SV=3
sp|P63104|1433Z_HUMAN	4546000	5038000	3787000	3294000	4641000	4522000	1	1.11	0.83	0.72	1.02	0.99	14-3-3 protein zeta/delta OS=Homo sapiens OX=9606 GN=YWHAZ PE=1 SV=1
E7EX29|E7EX29_HUMAN	4546000	5038000	3787000	3294000	4641000	4522000	1	1.11	0.83	0.72	1.02	0.99	14-3-3 protein zeta/delta (Fragment) OS=Homo sapiens OX=9606 GN=YWHAZ PE=1 SV=1
sp|P27169|PON1_HUMAN	46420000	44120000	40810000	39180000	37670000	42420000	1	0.95	0.88	0.84	0.81	0.91	Serum paraoxonase/arylesterase 1 OS=Homo sapiens OX=9606 GN=PON1 PE=1 SV=3
sp|O00391|QSOX1_HUMAN	6293000	6355000	6521000	6337000	5965000	5847000	1	1.01	1.04	1.01	0.95	0.93	Sulfhydryl oxidase 1 OS=Homo sapiens OX=9606 GN=QSOX1 PE=1 SV=3
A0A0A0MS09|A0A0A0MS09_HUMAN	5079000	8019000	3725000	5840000	2958000	3688000	1	1.58	0.73	1.15	0.58	0.73	Immunoglobulin heavy constant delta (Fragment) OS=Homo sapiens OX=9606 GN=IGHD PE=1 SV=1
sp|P01880|IGHD_HUMAN	5079000	8019000	3725000	5840000	2958000	3688000	1	1.58	0.73	1.15	0.58	0.73	Immunoglobulin heavy constant delta OS=Homo sapiens OX=9606 GN=IGHD PE=1 SV=3
sp|P80108|PHLD_HUMAN	5422000	4830000	5624000	5062000	4829000	5108000	1	0.89	1.04	0.93	0.89	0.94	Phosphatidylinositol-glycan-specific phospholipase D OS=Homo sapiens OX=9606 GN=GPLD1 PE=1 SV=3
sp|P07360|CO8G_HUMAN	8647000	9989000	9627000	12000000	10020000	9285000	1	1.16	1.11	1.39	1.16	1.07	Complement component C8 gamma chain OS=Homo sapiens OX=9606 GN=C8G PE=1 SV=3
A0A669KB69|A0A669KB69_HUMAN	2320000	2762000	2920000	3500000	3426000	3414000	1	1.19	1.26	1.51	1.48	1.47	Apolipoprotein A-V OS=Homo sapiens OX=9606 GN=APOA5 PE=1 SV=1
sp|Q6Q788|APOA5_HUMAN	2320000	2762000	2920000	3500000	3426000	3414000	1	1.19	1.26	1.51	1.48	1.47	Apolipoprotein A-V OS=Homo sapiens OX=9606 GN=APOA5 PE=1 SV=1
K7EKF6|K7EKF6_HUMAN	3502000	3572000	3983000	3242000	3401000	4109000	1	1.02	1.14	0.93	0.97	1.17	Angiopoietin-related protein 6 OS=Homo sapiens OX=9606 GN=ANGPTL6 PE=1 SV=1
sp|Q8NI99|ANGL6_HUMAN	3502000	3572000	3983000	3242000	3401000	4109000	1	1.02	1.14	0.93	0.97	1.17	Angiopoietin-related protein 6 OS=Homo sapiens OX=9606 GN=ANGPTL6 PE=1 SV=1
A0A075B7D0|A0A075B7D0_HUMAN	17780000	43990000	22780000	29300000	30510000	35410000	1	2.47	1.28	1.65	1.72	1.99	Immunoglobulin heavy variable 1/OR15-1 (non-functional) (Fragment) OS=Homo sapiens OX=9606 GN=IGHV1OR15-1 PE=1 SV=1
sp|P15169|CBPN_HUMAN	2998000	2351000	2689000	2505000	2477000	3150000	1	0.78	0.9	0.84	0.83	1.05	Carboxypeptidase N catalytic chain OS=Homo sapiens OX=9606 GN=CPN1 PE=1 SV=1
Q5VY30|Q5VY30_HUMAN	12570000	12200000	10300000	8549000	8132000	8147000	1	0.97	0.82	0.68	0.65	0.65	Retinol-binding protein OS=Homo sapiens OX=9606 GN=RBP4 PE=1 SV=2
sp|P02753|RET4_HUMAN	12570000	12200000	10300000	8549000	8132000	8147000	1	0.97	0.82	0.68	0.65	0.65	Retinol-binding protein 4 OS=Homo sapiens OX=9606 GN=RBP4 PE=1 SV=3
sp|A0A075B6K4|LV310_HUMAN	4547000	6219000	3359000	7026000	7373000	7921000	1	1.37	0.74	1.55	1.62	1.74	Immunoglobulin lambda variable 3-10 OS=Homo sapiens OX=9606 GN=IGLV3-10 PE=3 SV=2
sp|Q8WWZ8|OIT3_HUMAN	3982000	4162000	3769000	4749000	4452000	4785000	1	1.05	0.95	1.19	1.12	1.2	Oncoprotein-induced transcript 3 protein OS=Homo sapiens OX=9606 GN=OIT3 PE=1 SV=2
K7ER74|K7ER74_HUMAN	312900000	182600000	146300000	220700000	230700000	135400000	1	0.58	0.47	0.71	0.74	0.43	Apolipoprotein C-II OS=Homo sapiens OX=9606 GN=APOC4-APOC2 PE=1 SV=1
A0A2U3TZH6|A0A2U3TZH6_HUMAN	2985000	4127000	2442000	4114000	7452000	5674000	1	1.38	0.82	1.38	2.5	1.9	Band 4.1 OS=Homo sapiens OX=9606 GN=EPB41 PE=1 SV=1
sp|P11171|EPB41_HUMAN	2985000	4127000	2442000	4114000	7452000	5674000	1	1.38	0.82	1.38	2.5	1.9	Protein 4.1 OS=Homo sapiens OX=9606 GN=EPB41 PE=1 SV=4
A0A2R8Y7Y3|A0A2R8Y7Y3_HUMAN	2985000	4127000	2442000	4114000	7452000	5674000	1	1.38	0.82	1.38	2.5	1.9	Band 4.1 OS=Homo sapiens OX=9606 GN=EPB41 PE=1 SV=1
A0A2R8YD30|A0A2R8YD30_HUMAN	2985000	4127000	2442000	4114000	7452000	5674000	1	1.38	0.82	1.38	2.5	1.9	Band 4.1 OS=Homo sapiens OX=9606 GN=EPB41 PE=1 SV=1
A0A3B3ITP0|A0A3B3ITP0_HUMAN	2985000	4127000	2442000	4114000	7452000	5674000	1	1.38	0.82	1.38	2.5	1.9	Band 4.1 OS=Homo sapiens OX=9606 GN=EPB41 PE=1 SV=1
sp|P02763|A1AG1_HUMAN	42170000	81990000	51600000	59900000	79870000	66620000	1	1.94	1.22	1.42	1.89	1.58	Alpha-1-acid glycoprotein 1 OS=Homo sapiens OX=9606 GN=ORM1 PE=1 SV=1
sp|A0A0B4J1V0|HV315_HUMAN	14810000	11900000	10800000	7689000	11740000	8343000	1	0.8	0.73	0.52	0.79	0.56	Immunoglobulin heavy variable 3-15 OS=Homo sapiens OX=9606 GN=IGHV3-15 PE=3 SV=1
A0A182DWH7|A0A182DWH7_HUMAN	14430000	16720000	14160000	15640000	19720000	14950000	1	1.16	0.98	1.08	1.37	1.04	Selenoprotein P (Fragment) OS=Homo sapiens OX=9606 GN=SELENOP PE=1 SV=1
sp|P49908|SEPP1_HUMAN	14430000	16720000	14160000	15640000	19720000	14950000	1	1.16	0.98	1.08	1.37	1.04	Selenoprotein P OS=Homo sapiens OX=9606 GN=SELENOP PE=1 SV=3
A0A087X1J7|A0A087X1J7_HUMAN	17900000	31330000	20070000	16160000	16520000	18980000	1	1.75	1.12	0.9	0.92	1.06	Glutathione peroxidase OS=Homo sapiens OX=9606 GN=GPX3 PE=1 SV=1
sp|P22352|GPX3_HUMAN	17900000	31330000	20070000	16160000	16520000	18980000	1	1.75	1.12	0.9	0.92	1.06	Glutathione peroxidase 3 OS=Homo sapiens OX=9606 GN=GPX3 PE=1 SV=2
sp|P32119|PRDX2_HUMAN	3410000	4679000	3586000	5286000	6953000	5963000	1	1.37	1.05	1.55	2.04	1.75	Peroxiredoxin-2 OS=Homo sapiens OX=9606 GN=PRDX2 PE=1 SV=5
A0A5H1ZRS9|A0A5H1ZRS9_HUMAN	2842000	5625000	4069000	3632000	4396000	3588000	1	1.98	1.43	1.28	1.55	1.26	Immunoglobulin kappa variable 2D-29 OS=Homo sapiens OX=9606 GN=IGKV2D-29 PE=1 SV=1
sp|A0A075B6S2|KVD29_HUMAN	2842000	5625000	4069000	3632000	4396000	3588000	1	1.98	1.43	1.28	1.55	1.26	Immunoglobulin kappa variable 2D-29 OS=Homo sapiens OX=9606 GN=IGKV2D-29 PE=3 SV=1
sp|A2NJV5|KV229_HUMAN	2842000	5625000	4069000	3632000	4396000	3588000	1	1.98	1.43	1.28	1.55	1.26	Immunoglobulin kappa variable 2-29 OS=Homo sapiens OX=9606 GN=IGKV2-29 PE=3 SV=2
sp|P01742|HV169_HUMAN	7593000	10130000	6144000	15300000	11180000	11600000	1	1.33	0.81	2.02	1.47	1.53	Immunoglobulin heavy variable 1-69 OS=Homo sapiens OX=9606 GN=IGHV1-69 PE=1 SV=2
sp|P55056|APOC4_HUMAN	27660000	26850000	23010000	45420000	43490000	31720000	1	0.97	0.83	1.64	1.57	1.15	Apolipoprotein C-IV OS=Homo sapiens OX=9606 GN=APOC4 PE=1 SV=1
S4R460|S4R460_HUMAN	2448000	2632000	2770000	2139000	3762000	3311000	1	1.08	1.13	0.87	1.54	1.35	Immunoglobulin heavy variable 3/OR16-9 (non-functional) OS=Homo sapiens OX=9606 GN=IGHV3OR16-9 PE=1 SV=2
sp|P02750|A2GL_HUMAN	10550000	15370000	12250000	9724000	13980000	10320000	1	1.46	1.16	0.92	1.33	0.98	Leucine-rich alpha-2-glycoprotein OS=Homo sapiens OX=9606 GN=LRG1 PE=1 SV=2
sp|P14923|PLAK_HUMAN	3144000	4192000	3356000	3036000	4648000	4192000	1	1.33	1.07	0.97	1.48	1.33	Junction plakoglobin OS=Homo sapiens OX=9606 GN=JUP PE=1 SV=3
sp|Q7Z794|K2C1B_HUMAN	614200	777700	728400	538900	784100	736200	1	1.27	1.19	0.88	1.28	1.2	Keratin type II cytoskeletal 1b OS=Homo sapiens OX=9606 GN=KRT77 PE=1 SV=3
G3XAP6|G3XAP6_HUMAN	1593000	1235000	1408000	1412000	1122000	1462000	1	0.78	0.88	0.89	0.7	0.92	Cartilage oligomeric matrix protein OS=Homo sapiens OX=9606 GN=COMP PE=1 SV=1
sp|P49747|COMP_HUMAN	1593000	1235000	1408000	1412000	1122000	1462000	1	0.78	0.88	0.89	0.7	0.92	Cartilage oligomeric matrix protein OS=Homo sapiens OX=9606 GN=COMP PE=1 SV=2
sp|P0DMV8|HS71A_HUMAN	813100	913200	830600	818500	1446000	1034000	1	1.12	1.02	1.01	1.78	1.27	Heat shock 70 kDa protein 1A OS=Homo sapiens OX=9606 GN=HSPA1A PE=1 SV=1
sp|P0DMV9|HS71B_HUMAN	813100	913200	830600	818500	1446000	1034000	1	1.12	1.02	1.01	1.78	1.27	Heat shock 70 kDa protein 1B OS=Homo sapiens OX=9606 GN=HSPA1B PE=1 SV=1
A0A0G2JIW1|A0A0G2JIW1_HUMAN	813100	913200	830600	818500	1446000	1034000	1	1.12	1.02	1.01	1.78	1.27	Heat shock 70 kDa protein 1B OS=Homo sapiens OX=9606 GN=HSPA1B PE=1 SV=1
sp|P34931|HS71L_HUMAN	813100	913200	830600	818500	1446000	1034000	1	1.12	1.02	1.01	1.78	1.27	Heat shock 70 kDa protein 1-like OS=Homo sapiens OX=9606 GN=HSPA1L PE=1 SV=2
Q53FA3|Q53FA3_HUMAN	813100	913200	830600	818500	1446000	1034000	1	1.12	1.02	1.01	1.78	1.27	HSPA1L (Fragment) OS=Homo sapiens OX=9606 GN=HSPA1L PE=1 SV=1
sp|Q9UBX5|FBLN5_HUMAN	4086000	4046000	3722000	3097000	3676000	3146000	1	0.99	0.91	0.76	0.9	0.77	Fibulin-5 OS=Homo sapiens OX=9606 GN=FBLN5 PE=1 SV=1
G3V4U0|G3V4U0_HUMAN	4086000	4046000	3722000	3097000	3676000	3146000	1	0.99	0.91	0.76	0.9	0.77	Fibulin-5 OS=Homo sapiens OX=9606 GN=FBLN5 PE=1 SV=1
sp|P61626|LYSC_HUMAN	6294000	9254000	7208000	11540000	7031000	10880000	1	1.47	1.15	1.83	1.12	1.73	Lysozyme C OS=Homo sapiens OX=9606 GN=LYZ PE=1 SV=1
sp|P00740|FA9_HUMAN	3025000	3757000	3446000	2886000	4844000	3318000	1	1.24	1.14	0.95	1.6	1.1	Coagulation factor IX OS=Homo sapiens OX=9606 GN=F9 PE=1 SV=2
sp|A0A0A0MS15|HV349_HUMAN	1388000	2607000	2141000	2078000	1408000	1580000	1	1.88	1.54	1.5	1.01	1.14	Immunoglobulin heavy variable 3-49 OS=Homo sapiens OX=9606 GN=IGHV3-49 PE=3 SV=1
A0A0A0MSV6|A0A0A0MSV6_HUMAN	18500000	26010000	21920000	22370000	26170000	26740000	1	1.41	1.18	1.21	1.41	1.44	Complement C1q subcomponent subunit B (Fragment) OS=Homo sapiens OX=9606 GN=C1QB PE=1 SV=6
D6R934|D6R934_HUMAN	18500000	26010000	21920000	22370000	26170000	26740000	1	1.41	1.18	1.21	1.41	1.44	Complement C1q subcomponent subunit B OS=Homo sapiens OX=9606 GN=C1QB PE=1 SV=1
sp|P02746|C1QB_HUMAN	18500000	26010000	21920000	22370000	26170000	26740000	1	1.41	1.18	1.21	1.41	1.44	Complement C1q subcomponent subunit B OS=Homo sapiens OX=9606 GN=C1QB PE=1 SV=3
sp|O76009|KT33A_HUMAN	300900	430500	377300	276400	1645000	449200	1	1.43	1.25	0.92	5.47	1.49	Keratin type I cuticular Ha3-I OS=Homo sapiens OX=9606 GN=KRT33A PE=2 SV=2
sp|P11226|MBL2_HUMAN	3190000	4165000	2796000	5591000	5107000	3640000	1	1.31	0.88	1.75	1.6	1.14	Mannose-binding protein C OS=Homo sapiens OX=9606 GN=MBL2 PE=1 SV=2
A0A087WT59|A0A087WT59_HUMAN	31490000	46680000	28350000	79170000	26470000	54880000	1	1.48	0.9	2.51	0.84	1.74	Transthyretin OS=Homo sapiens OX=9606 GN=TTR PE=1 SV=2
sp|P02766|TTHY_HUMAN	31490000	46680000	28350000	79170000	26470000	54880000	1	1.48	0.9	2.51	0.84	1.74	Transthyretin OS=Homo sapiens OX=9606 GN=TTR PE=1 SV=1
sp|A0A0J9YXX1|HV5X1_HUMAN	24790000	81680000	51320000	47450000	24460000	84280000	1	3.29	2.07	1.91	0.99	3.4	Immunoglobulin heavy variable 5-10-1 OS=Homo sapiens OX=9606 GN=IGHV5-10-1 PE=3 SV=1
sp|P01780|HV307_HUMAN	45210000	46930000	37770000	46980000	54970000	44530000	1	1.04	0.84	1.04	1.22	0.98	Immunoglobulin heavy variable 3-7 OS=Homo sapiens OX=9606 GN=IGHV3-7 PE=1 SV=2
sp|Q15485|FCN2_HUMAN	35250000	28820000	20290000	15060000	35450000	24280000	1	0.82	0.58	0.43	1.01	0.69	Ficolin-2 OS=Homo sapiens OX=9606 GN=FCN2 PE=1 SV=2
A0A0J9YY99|A0A0J9YY99_HUMAN	33610000	35670000	29300000	34750000	33710000	36820000	1	1.06	0.87	1.03	1	1.1	Ig-like domain-containing protein (Fragment) OS=Homo sapiens OX=9606 PE=1 SV=1
sp|P01768|HV330_HUMAN	33610000	35670000	29300000	34750000	33710000	36820000	1	1.06	0.87	1.03	1	1.1	Immunoglobulin heavy variable 3-30 OS=Homo sapiens OX=9606 GN=IGHV3-30 PE=1 SV=2
sp|P0DP03|HVC05_HUMAN	33610000	35670000	29300000	34750000	33710000	36820000	1	1.06	0.87	1.03	1	1.1	Immunoglobulin heavy variable 3-30-5 OS=Homo sapiens OX=9606 GN=IGHV3-30-5 PE=3 SV=1
sp|P81605|DCD_HUMAN	23100000	26900000	13880000	14590000	37180000	18060000	1	1.16	0.6	0.63	1.61	0.78	Dermcidin OS=Homo sapiens OX=9606 GN=DCD PE=1 SV=2
B1AHM7|B1AHM7_HUMAN	804300	119000	432500	133900	222200	169100	1	0.15	0.54	0.17	0.28	0.21	Fibulin-1 (Fragment) OS=Homo sapiens OX=9606 GN=FBLN1 PE=1 SV=1
sp|P16452|EPB42_HUMAN	1734000	2136000	1351000	2345000	4733000	3585000	1	1.23	0.78	1.35	2.73	2.07	Protein 4.2 OS=Homo sapiens OX=9606 GN=EPB42 PE=1 SV=3
sp|O00602|FCN1_HUMAN	1775000	2053000	1854000	1461000	2434000	1750000	1	1.16	1.04	0.82	1.37	0.99	Ficolin-1 OS=Homo sapiens OX=9606 GN=FCN1 PE=1 SV=2
sp|A0A0B4J1X5|HV374_HUMAN	2603000	2820000	2102000	2164000	2038000	2079000	1	1.08	0.81	0.83	0.78	0.8	Immunoglobulin heavy variable 3-74 OS=Homo sapiens OX=9606 GN=IGHV3-74 PE=3 SV=1
V9GYM3|V9GYM3_HUMAN	1056000000	362200000	867000000	734500000	569900000	565000000	1	0.34	0.82	0.7	0.54	0.54	Apolipoprotein A-II OS=Homo sapiens OX=9606 GN=APOA2 PE=1 SV=1
V9GYE3|V9GYE3_HUMAN	1056000000	362200000	867000000	734500000	569900000	565000000	1	0.34	0.82	0.7	0.54	0.54	Apolipoprotein A-II OS=Homo sapiens OX=9606 GN=APOA2 PE=1 SV=1
V9GYG9|V9GYG9_HUMAN	1056000000	362200000	867000000	734500000	569900000	565000000	1	0.34	0.82	0.7	0.54	0.54	Apolipoprotein A-II (Fragment) OS=Homo sapiens OX=9606 GN=APOA2 PE=1 SV=1
sp|P02652|APOA2_HUMAN	1056000000	362200000	867000000	734500000	569900000	565000000	1	0.34	0.82	0.7	0.54	0.54	Apolipoprotein A-II OS=Homo sapiens OX=9606 GN=APOA2 PE=1 SV=1
sp|Q13103|SPP24_HUMAN	3749000	3062000	4000000	3493000	4676000	5308000	1	0.82	1.07	0.93	1.25	1.42	Secreted phosphoprotein 24 OS=Homo sapiens OX=9606 GN=SPP2 PE=1 SV=1
sp|Q6UY14|ATL4_HUMAN	377900	510200	437100	421900	459300	430900	1	1.35	1.16	1.12	1.22	1.14	ADAMTS-like protein 4 OS=Homo sapiens OX=9606 GN=ADAMTSL4 PE=1 SV=2
A0A669KBE7|A0A669KBE7_HUMAN	377900	510200	437100	421900	459300	430900	1	1.35	1.16	1.12	1.22	1.14	ADAMTS-like protein 4 OS=Homo sapiens OX=9606 GN=ADAMTSL4 PE=1 SV=1
I3L1J1|I3L1J1_HUMAN	6766000	6947000	6899000	6160000	6085000	6861000	1	1.03	1.02	0.91	0.9	1.01	Sex hormone-binding globulin OS=Homo sapiens OX=9606 GN=SHBG PE=1 SV=1
I3L145|I3L145_HUMAN	6766000	6947000	6899000	6160000	6085000	6861000	1	1.03	1.02	0.91	0.9	1.01	Sex hormone-binding globulin OS=Homo sapiens OX=9606 GN=SHBG PE=1 SV=1
sp|P04278|SHBG_HUMAN	6766000	6947000	6899000	6160000	6085000	6861000	1	1.03	1.02	0.91	0.9	1.01	Sex hormone-binding globulin OS=Homo sapiens OX=9606 GN=SHBG PE=1 SV=2
A0A0C4DGN2|A0A0C4DGN2_HUMAN	6766000	6947000	6899000	6160000	6085000	6861000	1	1.03	1.02	0.91	0.9	1.01	Sex hormone-binding globulin (Fragment) OS=Homo sapiens OX=9606 GN=SHBG PE=1 SV=1
sp|Q14525|KT33B_HUMAN	245500	386000	232500	246200	439900	306700	1	1.57	0.95	1	1.79	1.25	Keratin type I cuticular Ha3-II OS=Homo sapiens OX=9606 GN=KRT33B PE=1 SV=3
sp|P08571|CD14_HUMAN	5781000	7312000	6043000	6296000	6583000	5765000	1	1.26	1.05	1.09	1.14	1	Monocyte differentiation antigen CD14 OS=Homo sapiens OX=9606 GN=CD14 PE=1 SV=2
sp|Q9UHG3|PCYOX_HUMAN	3735000	3878000	4056000	4706000	6228000	3910000	1	1.04	1.09	1.26	1.67	1.05	Prenylcysteine oxidase 1 OS=Homo sapiens OX=9606 GN=PCYOX1 PE=1 SV=3
sp|P05154|IPSP_HUMAN	3647000	4056000	3303000	3489000	2993000	3598000	1	1.11	0.91	0.96	0.82	0.99	Plasma serine protease inhibitor OS=Homo sapiens OX=9606 GN=SERPINA5 PE=1 SV=3
sp|O95445|APOM_HUMAN	50500000	48570000	45210000	52350000	77170000	42550000	1	0.96	0.9	1.04	1.53	0.84	Apolipoprotein M OS=Homo sapiens OX=9606 GN=APOM PE=1 SV=2
sp|P18065|IBP2_HUMAN	1222000	1314000	839400	889200	1290000	1609000	1	1.08	0.69	0.73	1.06	1.32	Insulin-like growth factor-binding protein 2 OS=Homo sapiens OX=9606 GN=IGFBP2 PE=1 SV=2
C9JMY1|C9JMY1_HUMAN	1222000	1314000	839400	889200	1290000	1609000	1	1.08	0.69	0.73	1.06	1.32	Insulin-like growth factor-binding protein 2 OS=Homo sapiens OX=9606 GN=IGFBP2 PE=1 SV=1
sp|P03950|ANGI_HUMAN	2183000	2496000	2802000	3241000	2877000	2950000	1	1.14	1.28	1.48	1.32	1.35	Angiogenin OS=Homo sapiens OX=9606 GN=ANG PE=1 SV=1
sp|P69891|HBG1_HUMAN	1425000	2089000	1966000	4608000	2111000	1843000	1	1.47	1.38	3.23	1.48	1.29	Hemoglobin subunit gamma-1 OS=Homo sapiens OX=9606 GN=HBG1 PE=1 SV=2
sp|P69892|HBG2_HUMAN	1425000	2089000	1966000	4608000	2111000	1843000	1	1.47	1.38	3.23	1.48	1.29	Hemoglobin subunit gamma-2 OS=Homo sapiens OX=9606 GN=HBG2 PE=1 SV=2
A0A2R8Y7X9|A0A2R8Y7X9_HUMAN	1425000	2089000	1966000	4608000	2111000	1843000	1	1.47	1.38	3.23	1.48	1.29	GLOBIN domain-containing protein OS=Homo sapiens OX=9606 PE=3 SV=1
sp|Q15848|ADIPO_HUMAN	2415000	4119000	3068000	2916000	2811000	3018000	1	1.71	1.27	1.21	1.16	1.25	Adiponectin OS=Homo sapiens OX=9606 GN=ADIPOQ PE=1 SV=1
sp|P29622|KAIN_HUMAN	4690000	4558000	4652000	4994000	4496000	5138000	1	0.97	0.99	1.06	0.96	1.1	Kallistatin OS=Homo sapiens OX=9606 GN=SERPINA4 PE=1 SV=3
sp|P0DP04|HV43D_HUMAN	13910000	14430000	12320000	14360000	15570000	14710000	1	1.04	0.89	1.03	1.12	1.06	Immunoglobulin heavy variable 3-43D OS=Homo sapiens OX=9606 GN=IGHV3-43D PE=3 SV=1
A0A7P0TAW3|A0A7P0TAW3_HUMAN	1895000	2414000	1703000	2262000	3082000	2375000	1	1.27	0.9	1.19	1.63	1.25	Transitional endoplasmic reticulum ATPase OS=Homo sapiens OX=9606 GN=VCP PE=4 SV=1
A0A7I2V540|A0A7I2V540_HUMAN	1895000	2414000	1703000	2262000	3082000	2375000	1	1.27	0.9	1.19	1.63	1.25	15S Mg(2+)-ATPase p97 subunit OS=Homo sapiens OX=9606 GN=VCP PE=1 SV=1
sp|P55072|TERA_HUMAN	1895000	2414000	1703000	2262000	3082000	2375000	1	1.27	0.9	1.19	1.63	1.25	Transitional endoplasmic reticulum ATPase OS=Homo sapiens OX=9606 GN=VCP PE=1 SV=4
A0A7P0T8A3|A0A7P0T8A3_HUMAN	1895000	2414000	1703000	2262000	3082000	2375000	1	1.27	0.9	1.19	1.63	1.25	Transitional endoplasmic reticulum ATPase OS=Homo sapiens OX=9606 GN=VCP PE=4 SV=1
C9JUP7|C9JUP7_HUMAN	1895000	2414000	1703000	2262000	3082000	2375000	1	1.27	0.9	1.19	1.63	1.25	15S Mg(2+)-ATPase p97 subunit OS=Homo sapiens OX=9606 GN=VCP PE=1 SV=2
A0A7P0Z4C6|A0A7P0Z4C6_HUMAN	1895000	2414000	1703000	2262000	3082000	2375000	1	1.27	0.9	1.19	1.63	1.25	Transitional endoplasmic reticulum ATPase OS=Homo sapiens OX=9606 GN=VCP PE=4 SV=1
A0A7P0TAQ1|A0A7P0TAQ1_HUMAN	1895000	2414000	1703000	2262000	3082000	2375000	1	1.27	0.9	1.19	1.63	1.25	Transitional endoplasmic reticulum ATPase OS=Homo sapiens OX=9606 GN=VCP PE=4 SV=1
A0A7P0T8Q5|A0A7P0T8Q5_HUMAN	1895000	2414000	1703000	2262000	3082000	2375000	1	1.27	0.9	1.19	1.63	1.25	Transitional endoplasmic reticulum ATPase OS=Homo sapiens OX=9606 GN=VCP PE=4 SV=1
sp|A0A0B4J1X8|HV343_HUMAN	4145000	7340000	5046000	6172000	4933000	5124000	1	1.77	1.22	1.49	1.19	1.24	Immunoglobulin heavy variable 3-43 OS=Homo sapiens OX=9606 GN=IGHV3-43 PE=3 SV=1
sp|Q02413|DSG1_HUMAN	4098000	6195000	5267000	5093000	7588000	4975000	1	1.51	1.29	1.24	1.85	1.21	Desmoglein-1 OS=Homo sapiens OX=9606 GN=DSG1 PE=1 SV=2
sp|Q76LX8|ATS13_HUMAN	1697000	1801000	1618000	1429000	4219000	2102000	1	1.06	0.95	0.84	2.49	1.24	A disintegrin and metalloproteinase with thrombospondin motifs 13 OS=Homo sapiens OX=9606 GN=ADAMTS13 PE=1 SV=1
A0A075B7D8|A0A075B7D8_HUMAN	3538000	3190000	3349000	3661000	2864000	4529000	1	0.9	0.95	1.03	0.81	1.28	Immunoglobulin heavy variable 3/OR15-7 (pseudogene) (Fragment) OS=Homo sapiens OX=9606 GN=IGHV3OR15-7 PE=1 SV=1
sp|P28799|GRN_HUMAN	563800	741300	554900	439900	636000	483600	1	1.31	0.98	0.78	1.13	0.86	Progranulin OS=Homo sapiens OX=9606 GN=GRN PE=1 SV=2
sp|Q8IUL8|CILP2_HUMAN	731000	1078000	784800	780300	731200	810500	1	1.47	1.07	1.07	1	1.11	Cartilage intermediate layer protein 2 OS=Homo sapiens OX=9606 GN=CILP2 PE=2 SV=2
K7EPJ4|K7EPJ4_HUMAN	731000	1078000	784800	780300	731200	810500	1	1.47	1.07	1.07	1	1.11	Cartilage intermediate layer protein 2 OS=Homo sapiens OX=9606 GN=CILP2 PE=1 SV=1
X6RLJ0|X6RLJ0_HUMAN	49300000	36220000	55610000	61450000	52200000	73640000	1	0.73	1.13	1.25	1.06	1.49	Complement C1q subcomponent subunit A (Fragment) OS=Homo sapiens OX=9606 GN=C1QA PE=1 SV=7
sp|P02745|C1QA_HUMAN	49300000	36220000	55610000	61450000	52200000	73640000	1	0.73	1.13	1.25	1.06	1.49	Complement C1q subcomponent subunit A OS=Homo sapiens OX=9606 GN=C1QA PE=1 SV=2
sp|A0A0C4DH29|HV103_HUMAN	202900	319700	268600	307700	230100	281300	1	1.58	1.32	1.52	1.13	1.39	Immunoglobulin heavy variable 1-3 OS=Homo sapiens OX=9606 GN=IGHV1-3 PE=3 SV=1
E5RH81|E5RH81_HUMAN	1827000	1466000	2441000	3004000	3079000	2830000	1	0.8	1.34	1.64	1.69	1.55	Carbonic anhydrase (Fragment) OS=Homo sapiens OX=9606 GN=CA1 PE=1 SV=8
E5RHP7|E5RHP7_HUMAN	1827000	1466000	2441000	3004000	3079000	2830000	1	0.8	1.34	1.64	1.69	1.55	Carbonic anhydrase (Fragment) OS=Homo sapiens OX=9606 GN=CA1 PE=1 SV=1
sp|P00915|CAH1_HUMAN	1827000	1466000	2441000	3004000	3079000	2830000	1	0.8	1.34	1.64	1.69	1.55	Carbonic anhydrase 1 OS=Homo sapiens OX=9606 GN=CA1 PE=1 SV=2
sp|P05109|S10A8_HUMAN	3091000	4425000	2381000	2757000	4705000	3871000	1	1.43	0.77	0.89	1.52	1.25	Protein S100-A8 OS=Homo sapiens OX=9606 GN=S100A8 PE=1 SV=1
sp|Q9HDC9|APMAP_HUMAN	3094000	3769000	3260000	2578000	5862000	3559000	1	1.22	1.05	0.83	1.89	1.15	Adipocyte plasma membrane-associated protein OS=Homo sapiens OX=9606 GN=APMAP PE=1 SV=2
sp|P14543|NID1_HUMAN	1946000	3032000	2072000	1974000	3193000	2333000	1	1.56	1.07	1.01	1.64	1.2	Nidogen-1 OS=Homo sapiens OX=9606 GN=NID1 PE=1 SV=3
sp|P06276|CHLE_HUMAN	6873000	4107000	5355000	4353000	4231000	4845000	1	0.6	0.78	0.63	0.62	0.7	Cholinesterase OS=Homo sapiens OX=9606 GN=BCHE PE=1 SV=1
sp|P39060|COIA1_HUMAN	3948000	4170000	3780000	3819000	3361000	3799000	1	1.06	0.96	0.97	0.85	0.96	Collagen alpha-1(XVIII) chain OS=Homo sapiens OX=9606 GN=COL18A1 PE=1 SV=5
H7BXV5|H7BXV5_HUMAN	3948000	4170000	3780000	3819000	3361000	3799000	1	1.06	0.96	0.97	0.85	0.96	Collagen alpha-1(XVIII) chain (Fragment) OS=Homo sapiens OX=9606 GN=COL18A1 PE=1 SV=1
H7C457|H7C457_HUMAN	3948000	4170000	3780000	3819000	3361000	3799000	1	1.06	0.96	0.97	0.85	0.96	Collagen alpha-1(XVIII) chain (Fragment) OS=Homo sapiens OX=9606 GN=COL18A1 PE=1 SV=1
sp|P06753|TPM3_HUMAN	276700	480000	339000	330200	2518000	425100	1	1.74	1.23	1.19	9.1	1.54	Tropomyosin alpha-3 chain OS=Homo sapiens OX=9606 GN=TPM3 PE=1 SV=2
H7C4K3|H7C4K3_HUMAN	1071000	1223000	1084000	1080000	1194000	1287000	1	1.14	1.01	1.01	1.11	1.2	Integrin beta OS=Homo sapiens OX=9606 GN=ITGB1 PE=1 SV=2
A0A7I2V2F9|A0A7I2V2F9_HUMAN	1071000	1223000	1084000	1080000	1194000	1287000	1	1.14	1.01	1.01	1.11	1.2	Integrin beta OS=Homo sapiens OX=9606 GN=ITGB1 PE=1 SV=1
sp|P05556|ITB1_HUMAN	1071000	1223000	1084000	1080000	1194000	1287000	1	1.14	1.01	1.01	1.11	1.2	Integrin beta-1 OS=Homo sapiens OX=9606 GN=ITGB1 PE=1 SV=2
E7EUI6|E7EUI6_HUMAN	1071000	1223000	1084000	1080000	1194000	1287000	1	1.14	1.01	1.01	1.11	1.2	Integrin beta OS=Homo sapiens OX=9606 GN=ITGB1 PE=1 SV=2
sp|P08514|ITA2B_HUMAN	2558000	3171000	2108000	1818000	2525000	2612000	1	1.24	0.82	0.71	0.99	1.02	Integrin alpha-IIb OS=Homo sapiens OX=9606 GN=ITGA2B PE=1 SV=3
A0A075B7B8|A0A075B7B8_HUMAN	4018000	4719000	4339000	5793000	4219000	5740000	1	1.17	1.08	1.44	1.05	1.43	Immunoglobulin heavy variable 3/OR16-12 (non-functional) (Fragment) OS=Homo sapiens OX=9606 GN=IGHV3OR16-12 PE=1 SV=1
J3QSE5|J3QSE5_HUMAN	1194000	1072000	1174000	1343000	1155000	1014000	1	0.9	0.98	1.12	0.97	0.85	Phosphatidylcholine-sterol acyltransferase (Fragment) OS=Homo sapiens OX=9606 GN=LCAT PE=1 SV=1
sp|P04180|LCAT_HUMAN	1194000	1072000	1174000	1343000	1155000	1014000	1	0.9	0.98	1.12	0.97	0.85	Phosphatidylcholine-sterol acyltransferase OS=Homo sapiens OX=9606 GN=LCAT PE=1 SV=1
J3QKT0|J3QKT0_HUMAN	1194000	1072000	1174000	1343000	1155000	1014000	1	0.9	0.98	1.12	0.97	0.85	Phosphatidylcholine-sterol acyltransferase (Fragment) OS=Homo sapiens OX=9606 GN=LCAT PE=1 SV=1
sp|P62328|TYB4_HUMAN	5154000	7041000	3179000	3315000	5934000	5055000	1	1.37	0.62	0.64	1.15	0.98	Thymosin beta-4 OS=Homo sapiens OX=9606 GN=TMSB4X PE=1 SV=2
E7EPG1|E7EPG1_HUMAN	3475000	6367000	5039000	4417000	3920000	5975000	1	1.83	1.45	1.27	1.13	1.72	Multimerin-1 OS=Homo sapiens OX=9606 GN=MMRN1 PE=1 SV=1
sp|Q13201|MMRN1_HUMAN	3475000	6367000	5039000	4417000	3920000	5975000	1	1.83	1.45	1.27	1.13	1.72	Multimerin-1 OS=Homo sapiens OX=9606 GN=MMRN1 PE=1 SV=3
sp|P35443|TSP4_HUMAN	1739000	1373000	1809000	1748000	1201000	1791000	1	0.79	1.04	1.01	0.69	1.03	Thrombospondin-4 OS=Homo sapiens OX=9606 GN=THBS4 PE=1 SV=2
E7ES19|E7ES19_HUMAN	1739000	1373000	1809000	1748000	1201000	1791000	1	0.79	1.04	1.01	0.69	1.03	Thrombospondin-4 OS=Homo sapiens OX=9606 GN=THBS4 PE=1 SV=1
sp|Q9UK55|ZPI_HUMAN	5703000	6841000	6828000	5505000	7761000	6063000	1	1.2	1.2	0.97	1.36	1.06	Protein Z-dependent protease inhibitor OS=Homo sapiens OX=9606 GN=SERPINA10 PE=1 SV=1
G3V2W1|G3V2W1_HUMAN	5703000	6841000	6828000	5505000	7761000	6063000	1	1.2	1.2	0.97	1.36	1.06	Protein Z-dependent protease inhibitor OS=Homo sapiens OX=9606 GN=SERPINA10 PE=1 SV=1
sp|P31944|CASPE_HUMAN	2461000	1228000	656800	818900	2486000	1096000	1	0.5	0.27	0.33	1.01	0.45	Caspase-14 OS=Homo sapiens OX=9606 GN=CASP14 PE=1 SV=2
sp|Q6UWP8|SBSN_HUMAN	560300	633500	499600	529600	714400	581600	1	1.13	0.89	0.95	1.28	1.04	Suprabasin OS=Homo sapiens OX=9606 GN=SBSN PE=1 SV=2
sp|P06702|S10A9_HUMAN	2065000	2849000	1843000	1935000	2834000	2704000	1	1.38	0.89	0.94	1.37	1.31	Protein S100-A9 OS=Homo sapiens OX=9606 GN=S100A9 PE=1 SV=1
sp|P13796|PLSL_HUMAN	2897000	3659000	2747000	2478000	2881000	2718000	1	1.26	0.95	0.86	0.99	0.94	Plastin-2 OS=Homo sapiens OX=9606 GN=LCP1 PE=1 SV=6
sp|P00338|LDHA_HUMAN	523700	541100	490600	493100	635100	560200	1	1.03	0.94	0.94	1.21	1.07	L-lactate dehydrogenase A chain OS=Homo sapiens OX=9606 GN=LDHA PE=1 SV=2
A0A0S2Z4G6|A0A0S2Z4G6_HUMAN	588500	1402000	460600	479100	818800	965800	1	2.38	0.78	0.81	1.39	1.64	Tropomyosin 1 (Alpha) isoform CRA_o (Fragment) OS=Homo sapiens OX=9606 GN=TPM1 PE=1 SV=1
sp|P09493|TPM1_HUMAN	588500	1402000	460600	479100	818800	965800	1	2.38	0.78	0.81	1.39	1.64	Tropomyosin alpha-1 chain OS=Homo sapiens OX=9606 GN=TPM1 PE=1 SV=2
Q6ZN40|Q6ZN40_HUMAN	588500	1402000	460600	479100	818800	965800	1	2.38	0.78	0.81	1.39	1.64	Tropomyosin 1 (Alpha) isoform CRA_f OS=Homo sapiens OX=9606 GN=TPM1 PE=1 SV=1
F5H7S3|F5H7S3_HUMAN	477800	520500	291200	348600	695000	683800	1	1.09	0.61	0.73	1.45	1.43	Tropomyosin alpha-1 chain OS=Homo sapiens OX=9606 GN=TPM1 PE=1 SV=2
H7BYY1|H7BYY1_HUMAN	477800	520500	291200	348600	695000	683800	1	1.09	0.61	0.73	1.45	1.43	Tropomyosin 1 (Alpha) isoform CRA_m OS=Homo sapiens OX=9606 GN=TPM1 PE=1 SV=1
B7Z596|B7Z596_HUMAN	477800	520500	291200	348600	695000	683800	1	1.09	0.61	0.73	1.45	1.43	Tropomyosin alpha-1 chain OS=Homo sapiens OX=9606 GN=TPM1 PE=1 SV=1
sp|Q02985|FHR3_HUMAN	440500	1284000	1013000	748000	724800	1178000	1	2.92	2.3	1.7	1.65	2.67	Complement factor H-related protein 3 OS=Homo sapiens OX=9606 GN=CFHR3 PE=1 SV=2
sp|Q92496|FHR4_HUMAN	416100	332900	386000	396000	450300	630200	1	0.8	0.93	0.95	1.08	1.51	Complement factor H-related protein 4 OS=Homo sapiens OX=9606 GN=CFHR4 PE=1 SV=3
A0A0C4DH21|A0A0C4DH21_HUMAN	416100	332900	386000	396000	450300	630200	1	0.8	0.93	0.95	1.08	1.51	Complement factor H-related protein 4 OS=Homo sapiens OX=9606 GN=CFHR4 PE=1 SV=1
A0A2Q2TTZ9|A0A2Q2TTZ9_HUMAN	4957000	5813000	5282000	7067000	5647000	6723000	1	1.17	1.07	1.43	1.14	1.36	Immunoglobulin kappa variable 1-33 OS=Homo sapiens OX=9606 GN=IGKV1D-33 PE=1 SV=1
sp|P33151|CADH5_HUMAN	3449000	3846000	4341000	4010000	3053000	3291000	1	1.11	1.26	1.16	0.89	0.95	Cadherin-5 OS=Homo sapiens OX=9606 GN=CDH5 PE=1 SV=5
I3L1J2|I3L1J2_HUMAN	3449000	3846000	4341000	4010000	3053000	3291000	1	1.11	1.26	1.16	0.89	0.95	Cadherin-5 OS=Homo sapiens OX=9606 GN=CDH5 PE=1 SV=1
sp|P07355|ANXA2_HUMAN	2173000	1960000	1548000	1645000	2273000	1821000	1	0.9	0.71	0.76	1.05	0.84	Annexin A2 OS=Homo sapiens OX=9606 GN=ANXA2 PE=1 SV=2
H0YMW4|H0YMW4_HUMAN	2173000	1960000	1548000	1645000	2273000	1821000	1	0.9	0.71	0.76	1.05	0.84	Annexin OS=Homo sapiens OX=9606 GN=ANXA2 PE=1 SV=2
B7Z6Z4|B7Z6Z4_HUMAN	1015000	1169000	645600	668900	1147000	981600	1	1.15	0.64	0.66	1.13	0.97	Myosin light polypeptide 6 OS=Homo sapiens OX=9606 GN=MYL6 PE=1 SV=1
F8W1R7|F8W1R7_HUMAN	1015000	1169000	645600	668900	1147000	981600	1	1.15	0.64	0.66	1.13	0.97	Myosin light polypeptide 6 OS=Homo sapiens OX=9606 GN=MYL6 PE=1 SV=1
sp|P60660|MYL6_HUMAN	1015000	1169000	645600	668900	1147000	981600	1	1.15	0.64	0.66	1.13	0.97	Myosin light polypeptide 6 OS=Homo sapiens OX=9606 GN=MYL6 PE=1 SV=2
J3KND3|J3KND3_HUMAN	1015000	1169000	645600	668900	1147000	981600	1	1.15	0.64	0.66	1.13	0.97	Myosin light polypeptide 6 OS=Homo sapiens OX=9606 GN=MYL6 PE=1 SV=1
G8JLA2|G8JLA2_HUMAN	1015000	1169000	645600	668900	1147000	981600	1	1.15	0.64	0.66	1.13	0.97	Myosin light polypeptide 6 OS=Homo sapiens OX=9606 GN=MYL6 PE=1 SV=1
G3V1V0|G3V1V0_HUMAN	1015000	1169000	645600	668900	1147000	981600	1	1.15	0.64	0.66	1.13	0.97	Myosin light polypeptide 6 OS=Homo sapiens OX=9606 GN=MYL6 PE=1 SV=1
F8W1I5|F8W1I5_HUMAN	1015000	1169000	645600	668900	1147000	981600	1	1.15	0.64	0.66	1.13	0.97	Myosin light chain 6B OS=Homo sapiens OX=9606 GN=MYL6B PE=1 SV=1
sp|P14649|MYL6B_HUMAN	1015000	1169000	645600	668900	1147000	981600	1	1.15	0.64	0.66	1.13	0.97	Myosin light chain 6B OS=Homo sapiens OX=9606 GN=MYL6B PE=1 SV=1
F8VPF3|F8VPF3_HUMAN	1015000	1169000	645600	668900	1147000	981600	1	1.15	0.64	0.66	1.13	0.97	Myosin light polypeptide 6 (Fragment) OS=Homo sapiens OX=9606 GN=MYL6 PE=1 SV=1
sp|P50552|VASP_HUMAN	1102000	651300	476400	459500	657100	802300	1	0.59	0.43	0.42	0.6	0.73	Vasodilator-stimulated phosphoprotein OS=Homo sapiens OX=9606 GN=VASP PE=1 SV=3
sp|Q6UXB8|PI16_HUMAN	1843000	1601000	1565000	2010000	1515000	1542000	1	0.87	0.85	1.09	0.82	0.84	Peptidase inhibitor 16 OS=Homo sapiens OX=9606 GN=PI16 PE=1 SV=1
sp|P49913|CAMP_HUMAN	3442000	3662000	3354000	4881000	4359000	4470000	1	1.06	0.97	1.42	1.27	1.3	Cathelicidin antimicrobial peptide OS=Homo sapiens OX=9606 GN=CAMP PE=1 SV=1
J3KNB4|J3KNB4_HUMAN	3442000	3662000	3354000	4881000	4359000	4470000	1	1.06	0.97	1.42	1.27	1.3	Antibacterial peptide FALL-39 OS=Homo sapiens OX=9606 GN=CAMP PE=1 SV=1
sp|P14151|LYAM1_HUMAN	6633000	6631000	6032000	5583000	6201000	6110000	1	1	0.91	0.84	0.93	0.92	L-selectin OS=Homo sapiens OX=9606 GN=SELL PE=1 SV=2
A0A5H1ZRS2|A0A5H1ZRS2_HUMAN	223800	351500	256600	258400	278900	238700	1	1.57	1.15	1.15	1.25	1.07	Immunoglobulin kappa variable 2D-28 OS=Homo sapiens OX=9606 GN=IGKV2D-28 PE=1 SV=1
A0A087X0Q4|A0A087X0Q4_HUMAN	223800	351500	256600	258400	278900	238700	1	1.57	1.15	1.15	1.25	1.07	Immunoglobulin kappa variable 2-40 OS=Homo sapiens OX=9606 GN=IGKV2-40 PE=1 SV=1
sp|P01615|KVD28_HUMAN	223800	351500	256600	258400	278900	238700	1	1.57	1.15	1.15	1.25	1.07	Immunoglobulin kappa variable 2D-28 OS=Homo sapiens OX=9606 GN=IGKV2D-28 PE=1 SV=2
sp|A0A075B6P5|KV228_HUMAN	223800	351500	256600	258400	278900	238700	1	1.57	1.15	1.15	1.25	1.07	Immunoglobulin kappa variable 2-28 OS=Homo sapiens OX=9606 GN=IGKV2-28 PE=3 SV=1
sp|P01614|KVD40_HUMAN	223800	351500	256600	258400	278900	238700	1	1.57	1.15	1.15	1.25	1.07	Immunoglobulin kappa variable 2D-40 OS=Homo sapiens OX=9606 GN=IGKV2D-40 PE=1 SV=2
sp|A0A087WW87|KV240_HUMAN	223800	351500	256600	258400	278900	238700	1	1.57	1.15	1.15	1.25	1.07	Immunoglobulin kappa variable 2-40 OS=Homo sapiens OX=9606 GN=IGKV2-40 PE=3 SV=2
E7EUT5|E7EUT5_HUMAN	2712000	2720000	2327000	2866000	4345000	4128000	1	1	0.86	1.06	1.6	1.52	Glyceraldehyde-3-phosphate dehydrogenase OS=Homo sapiens OX=9606 GN=GAPDH PE=1 SV=1
sp|P04406|G3P_HUMAN	2712000	2720000	2327000	2866000	4345000	4128000	1	1	0.86	1.06	1.6	1.52	Glyceraldehyde-3-phosphate dehydrogenase OS=Homo sapiens OX=9606 GN=GAPDH PE=1 SV=3
sp|Q86UX7|URP2_HUMAN	629900	882800	274100	275200	350500	505900	1	1.4	0.44	0.44	0.56	0.8	Fermitin family homolog 3 OS=Homo sapiens OX=9606 GN=FERMT3 PE=1 SV=1
sp|A0A075B6K0|LV316_HUMAN	8846000	13000000	7892000	24400000	11510000	17350000	1	1.47	0.89	2.76	1.3	1.96	Immunoglobulin lambda variable 3-16 OS=Homo sapiens OX=9606 GN=IGLV3-16 PE=3 SV=2
sp|A0A075B6R9|KVD24_HUMAN	4944000	4848000	4324000	4217000	3506000	3686000	1	0.98	0.87	0.85	0.71	0.75	Probable non-functional immunoglobulin kappa variable 2D-24 OS=Homo sapiens OX=9606 GN=IGKV2D-24 PE=1 SV=1
sp|A0A0C4DH68|KV224_HUMAN	4944000	4848000	4324000	4217000	3506000	3686000	1	0.98	0.87	0.85	0.71	0.75	Immunoglobulin kappa variable 2-24 OS=Homo sapiens OX=9606 GN=IGKV2-24 PE=3 SV=1
sp|P35858|ALS_HUMAN	4255000	3599000	4856000	4884000	3317000	4405000	1	0.85	1.14	1.15	0.78	1.04	Insulin-like growth factor-binding protein complex acid labile subunit OS=Homo sapiens OX=9606 GN=IGFALS PE=1 SV=1
sp|P14618|KPYM_HUMAN	1100000	1073000	917500	856200	1076000	959900	1	0.98	0.83	0.78	0.98	0.87	Pyruvate kinase PKM OS=Homo sapiens OX=9606 GN=PKM PE=1 SV=4
H3BTN5|H3BTN5_HUMAN	1100000	1073000	917500	856200	1076000	959900	1	0.98	0.83	0.78	0.98	0.87	Pyruvate kinase (Fragment) OS=Homo sapiens OX=9606 GN=PKM PE=1 SV=1
B4DNK4|B4DNK4_HUMAN	1100000	1073000	917500	856200	1076000	959900	1	0.98	0.83	0.78	0.98	0.87	Pyruvate kinase OS=Homo sapiens OX=9606 GN=PKM PE=1 SV=1
sp|Q14315|FLNC_HUMAN	274300	277900	255600	364900	917300	444300	1	1.01	0.93	1.33	3.34	1.62	Filamin-C OS=Homo sapiens OX=9606 GN=FLNC PE=1 SV=3
sp|P43251|BTD_HUMAN	612700	821500	649900	803600	946700	699600	1	1.34	1.06	1.31	1.55	1.14	Biotinidase OS=Homo sapiens OX=9606 GN=BTD PE=1 SV=2
J3KSC4|J3KSC4_HUMAN	1318000	1342000	933700	753700	1260000	960500	1	1.02	0.71	0.57	0.96	0.73	Ras-related C3 botulinum toxin substrate 3 (Fragment) OS=Homo sapiens OX=9606 GN=RAC3 PE=1 SV=1
J3QLK0|J3QLK0_HUMAN	1318000	1342000	933700	753700	1260000	960500	1	1.02	0.71	0.57	0.96	0.73	Ras-related C3 botulinum toxin substrate 3 (Fragment) OS=Homo sapiens OX=9606 GN=RAC3 PE=1 SV=1
B1AH77|B1AH77_HUMAN	1318000	1342000	933700	753700	1260000	960500	1	1.02	0.71	0.57	0.96	0.73	Ras-related C3 botulinum toxin substrate 2 OS=Homo sapiens OX=9606 GN=RAC2 PE=1 SV=1
B1AH80|B1AH80_HUMAN	1318000	1342000	933700	753700	1260000	960500	1	1.02	0.71	0.57	0.96	0.73	Ras-related C3 botulinum toxin substrate 2 OS=Homo sapiens OX=9606 GN=RAC2 PE=1 SV=1
sp|P63000|RAC1_HUMAN	1318000	1342000	933700	753700	1260000	960500	1	1.02	0.71	0.57	0.96	0.73	Ras-related C3 botulinum toxin substrate 1 OS=Homo sapiens OX=9606 GN=RAC1 PE=1 SV=1
sp|P15153|RAC2_HUMAN	1318000	1342000	933700	753700	1260000	960500	1	1.02	0.71	0.57	0.96	0.73	Ras-related C3 botulinum toxin substrate 2 OS=Homo sapiens OX=9606 GN=RAC2 PE=1 SV=1
sp|P60763|RAC3_HUMAN	1318000	1342000	933700	753700	1260000	960500	1	1.02	0.71	0.57	0.96	0.73	Ras-related C3 botulinum toxin substrate 3 OS=Homo sapiens OX=9606 GN=RAC3 PE=1 SV=1
sp|P11277|SPTB1_HUMAN	1665000	1644000	1282000	2021000	2937000	2840000	1	0.99	0.77	1.21	1.76	1.71	Spectrin beta chain erythrocytic OS=Homo sapiens OX=9606 GN=SPTB PE=1 SV=5
sp|A0A075B6H9|LV469_HUMAN	2299000	7791000	2555000	2766000	3054000	2528000	1	3.39	1.11	1.2	1.33	1.1	Immunoglobulin lambda variable 4-69 OS=Homo sapiens OX=9606 GN=IGLV4-69 PE=1 SV=1
A0A669KB81|A0A669KB81_HUMAN	931200	1066000	988300	1276000	1759000	1116000	1	1.14	1.06	1.37	1.89	1.2	Proprotein convertase subtilisin/kexin type 9 (Fragment) OS=Homo sapiens OX=9606 GN=PCSK9 PE=1 SV=1
A0A669KBG0|A0A669KBG0_HUMAN	931200	1066000	988300	1276000	1759000	1116000	1	1.14	1.06	1.37	1.89	1.2	Proprotein convertase 9 OS=Homo sapiens OX=9606 GN=PCSK9 PE=1 SV=1
sp|Q8NBP7|PCSK9_HUMAN	931200	1066000	988300	1276000	1759000	1116000	1	1.14	1.06	1.37	1.89	1.2	Proprotein convertase subtilisin/kexin type 9 OS=Homo sapiens OX=9606 GN=PCSK9 PE=1 SV=3
sp|P07195|LDHB_HUMAN	99830	136600	77130	86140	98060	165400	1	1.37	0.77	0.86	0.98	1.66	L-lactate dehydrogenase B chain OS=Homo sapiens OX=9606 GN=LDHB PE=1 SV=2
A0A5F9ZHM4|A0A5F9ZHM4_HUMAN	99830	136600	77130	86140	98060	165400	1	1.37	0.77	0.86	0.98	1.66	L-lactate dehydrogenase OS=Homo sapiens OX=9606 GN=LDHB PE=1 SV=1
sp|A0A0A0MT36|KVD21_HUMAN	1494000	1867000	2192000	1551000	1772000	1464000	1	1.25	1.47	1.04	1.19	0.98	Immunoglobulin kappa variable 6D-21 OS=Homo sapiens OX=9606 GN=IGKV6D-21 PE=3 SV=1
sp|A0A0C4DH31|HV118_HUMAN	682000	278000	218100	336300	313000	310400	1	0.41	0.32	0.49	0.46	0.46	Immunoglobulin heavy variable 1-18 OS=Homo sapiens OX=9606 GN=IGHV1-18 PE=3 SV=1
sp|Q5T749|KPRP_HUMAN	1454000	1712000	1505000	1694000	2531000	1983000	1	1.18	1.04	1.17	1.74	1.36	Keratinocyte proline-rich protein OS=Homo sapiens OX=9606 GN=KPRP PE=1 SV=1
sp|Q08495|DEMA_HUMAN	1520000	2528000	1511000	1936000	2983000	2230000	1	1.66	0.99	1.27	1.96	1.47	Dematin OS=Homo sapiens OX=9606 GN=DMTN PE=1 SV=3
K7ENT6|K7ENT6_HUMAN	2635000	3159000	1693000	1187000	2034000	3128000	1	1.2	0.64	0.45	0.77	1.19	Tropomyosin alpha-4 chain OS=Homo sapiens OX=9606 GN=TPM4 PE=1 SV=3
A0A2R8YHD2|A0A2R8YHD2_HUMAN	2635000	3159000	1693000	1187000	2034000	3128000	1	1.2	0.64	0.45	0.77	1.19	Tropomyosin alpha-4 chain (Fragment) OS=Homo sapiens OX=9606 GN=TPM4 PE=1 SV=2
A0A2R8YH90|A0A2R8YH90_HUMAN	2635000	3159000	1693000	1187000	2034000	3128000	1	1.2	0.64	0.45	0.77	1.19	Tropomyosin alpha-4 chain (Fragment) OS=Homo sapiens OX=9606 GN=TPM4 PE=1 SV=1
A0A2R8Y5V9|A0A2R8Y5V9_HUMAN	2635000	3159000	1693000	1187000	2034000	3128000	1	1.2	0.64	0.45	0.77	1.19	Tropomyosin alpha-4 chain OS=Homo sapiens OX=9606 GN=TPM4 PE=1 SV=1
A0A2R8YE05|A0A2R8YE05_HUMAN	2635000	3159000	1693000	1187000	2034000	3128000	1	1.2	0.64	0.45	0.77	1.19	Tropomyosin alpha-4 chain OS=Homo sapiens OX=9606 GN=TPM4 PE=1 SV=1
sp|P67936|TPM4_HUMAN	2635000	3159000	1693000	1187000	2034000	3128000	1	1.2	0.64	0.45	0.77	1.19	Tropomyosin alpha-4 chain OS=Homo sapiens OX=9606 GN=TPM4 PE=1 SV=3
A0A5F9UN72|A0A5F9UN72_HUMAN	2635000	3159000	1693000	1187000	2034000	3128000	1	1.2	0.64	0.45	0.77	1.19	Tropomyosin 4 isoform CRA_c OS=Homo sapiens OX=9606 GN=TPM4 PE=1 SV=1
F5H7Y6|F5H7Y6_HUMAN	1356000	1783000	1200000	905200	1528000	1552000	1	1.32	0.88	0.67	1.13	1.14	Ras-related protein Rap-1b OS=Homo sapiens OX=9606 GN=RAP1B PE=1 SV=1
E7ESV4|E7ESV4_HUMAN	1356000	1783000	1200000	905200	1528000	1552000	1	1.32	0.88	0.67	1.13	1.14	Ras-related protein Rap-1b (Fragment) OS=Homo sapiens OX=9606 GN=RAP1B PE=1 SV=1
sp|P61224|RAP1B_HUMAN	1356000	1783000	1200000	905200	1528000	1552000	1	1.32	0.88	0.67	1.13	1.14	Ras-related protein Rap-1b OS=Homo sapiens OX=9606 GN=RAP1B PE=1 SV=1
sp|A6NIZ1|RP1BL_HUMAN	1356000	1783000	1200000	905200	1528000	1552000	1	1.32	0.88	0.67	1.13	1.14	Ras-related protein Rap-1b-like protein OS=Homo sapiens OX=9606 PE=2 SV=1
sp|P55058|PLTP_HUMAN	5463000	4707000	5205000	5367000	5029000	5440000	1	0.86	0.95	0.98	0.92	1	Phospholipid transfer protein OS=Homo sapiens OX=9606 GN=PLTP PE=1 SV=1
sp|A0A0G2JS06|LV539_HUMAN	4539000	4002000	4056000	2972000	4413000	3680000	1	0.88	0.89	0.65	0.97	0.81	Immunoglobulin lambda variable 5-39 OS=Homo sapiens OX=9606 GN=IGLV5-39 PE=3 SV=1
A0A0G2JSC0|A0A0G2JSC0_HUMAN	4539000	4002000	4056000	2972000	4413000	3680000	1	0.88	0.89	0.65	0.97	0.81	Immunoglobulin lambda variable 5-45 (Fragment) OS=Homo sapiens OX=9606 GN=IGLV5-45 PE=1 SV=1
sp|A0A087WSX0|LV545_HUMAN	4539000	4002000	4056000	2972000	4413000	3680000	1	0.88	0.89	0.65	0.97	0.81	Immunoglobulin lambda variable 5-45 OS=Homo sapiens OX=9606 GN=IGLV5-45 PE=3 SV=1
sp|P08185|CBG_HUMAN	42340000	37990000	46400000	25100000	31540000	27890000	1	0.9	1.1	0.59	0.74	0.66	Corticosteroid-binding globulin OS=Homo sapiens OX=9606 GN=SERPINA6 PE=1 SV=1
sp|Q9Y240|CLC11_HUMAN	1011000	982400	1053000	1009000	1150000	1405000	1	0.97	1.04	1	1.14	1.39	C-type lectin domain family 11 member A OS=Homo sapiens OX=9606 GN=CLEC11A PE=1 SV=1
sp|P23083|HV102_HUMAN	116400	140700	98890	59680	89330	62960	1	1.21	0.85	0.51	0.77	0.54	Immunoglobulin heavy variable 1-2 OS=Homo sapiens OX=9606 GN=IGHV1-2 PE=1 SV=2
A0A087X0S5|A0A087X0S5_HUMAN	854100	986800	895000	744100	812100	718900	1	1.16	1.05	0.87	0.95	0.84	Collagen alpha-1(VI) chain OS=Homo sapiens OX=9606 GN=COL6A1 PE=1 SV=1
sp|P12109|CO6A1_HUMAN	854100	986800	895000	744100	812100	718900	1	1.16	1.05	0.87	0.95	0.84	Collagen alpha-1(VI) chain OS=Homo sapiens OX=9606 GN=COL6A1 PE=1 SV=3
sp|Q96A08|H2B1A_HUMAN	857200	1187000	1297000	944100	1411000	1857000	1	1.38	1.51	1.1	1.65	2.17	Histone H2B type 1-A OS=Homo sapiens OX=9606 GN=H2BC1 PE=1 SV=3
sp|P57053|H2BFS_HUMAN	857200	1187000	1297000	944100	1411000	1857000	1	1.38	1.51	1.1	1.65	2.17	Histone H2B type F-S OS=Homo sapiens OX=9606 GN=H2BS1 PE=1 SV=2
sp|O60814|H2B1K_HUMAN	857200	1187000	1297000	944100	1411000	1857000	1	1.38	1.51	1.1	1.65	2.17	Histone H2B type 1-K OS=Homo sapiens OX=9606 GN=H2BC12 PE=1 SV=3
sp|P58876|H2B1D_HUMAN	857200	1187000	1297000	944100	1411000	1857000	1	1.38	1.51	1.1	1.65	2.17	Histone H2B type 1-D OS=Homo sapiens OX=9606 GN=H2BC5 PE=1 SV=2
sp|P23527|H2B1O_HUMAN	857200	1187000	1297000	944100	1411000	1857000	1	1.38	1.51	1.1	1.65	2.17	Histone H2B type 1-O OS=Homo sapiens OX=9606 GN=H2BC17 PE=1 SV=3
sp|Q16778|H2B2E_HUMAN	857200	1187000	1297000	944100	1411000	1857000	1	1.38	1.51	1.1	1.65	2.17	Histone H2B type 2-E OS=Homo sapiens OX=9606 GN=H2BC21 PE=1 SV=3
sp|P33778|H2B1B_HUMAN	857200	1187000	1297000	944100	1411000	1857000	1	1.38	1.51	1.1	1.65	2.17	Histone H2B type 1-B OS=Homo sapiens OX=9606 GN=H2BC3 PE=1 SV=2
sp|Q99879|H2B1M_HUMAN	857200	1187000	1297000	944100	1411000	1857000	1	1.38	1.51	1.1	1.65	2.17	Histone H2B type 1-M OS=Homo sapiens OX=9606 GN=H2BC14 PE=1 SV=3
sp|Q93079|H2B1H_HUMAN	857200	1187000	1297000	944100	1411000	1857000	1	1.38	1.51	1.1	1.65	2.17	Histone H2B type 1-H OS=Homo sapiens OX=9606 GN=H2BC9 PE=1 SV=3
sp|Q99880|H2B1L_HUMAN	857200	1187000	1297000	944100	1411000	1857000	1	1.38	1.51	1.1	1.65	2.17	Histone H2B type 1-L OS=Homo sapiens OX=9606 GN=H2BC13 PE=1 SV=3
sp|Q99877|H2B1N_HUMAN	857200	1187000	1297000	944100	1411000	1857000	1	1.38	1.51	1.1	1.65	2.17	Histone H2B type 1-N OS=Homo sapiens OX=9606 GN=H2BC15 PE=1 SV=3
sp|P62807|H2B1C_HUMAN	857200	1187000	1297000	944100	1411000	1857000	1	1.38	1.51	1.1	1.65	2.17	Histone H2B type 1-C/E/F/G/I OS=Homo sapiens OX=9606 GN=H2BC10 PE=1 SV=4
sp|P06899|H2B1J_HUMAN	857200	1187000	1297000	944100	1411000	1857000	1	1.38	1.51	1.1	1.65	2.17	Histone H2B type 1-J OS=Homo sapiens OX=9606 GN=H2BC11 PE=1 SV=3
U3KQK0|U3KQK0_HUMAN	857200	1187000	1297000	944100	1411000	1857000	1	1.38	1.51	1.1	1.65	2.17	Histone H2B OS=Homo sapiens OX=9606 GN=H2BC15 PE=1 SV=1
sp|Q5QNW6|H2B2F_HUMAN	857200	1187000	1297000	944100	1411000	1857000	1	1.38	1.51	1.1	1.65	2.17	Histone H2B type 2-F OS=Homo sapiens OX=9606 GN=H2BC18 PE=1 SV=3
sp|Q96RW7|HMCN1_HUMAN	1522000	1531000	1277000	7623000	1286000	3837000	1	1.01	0.84	5.01	0.84	2.52	Hemicentin-1 OS=Homo sapiens OX=9606 GN=HMCN1 PE=1 SV=2
sp|A0A0C4DH24|KV621_HUMAN	996200	1347000	1075000	1178000	1122000	1154000	1	1.35	1.08	1.18	1.13	1.16	Immunoglobulin kappa variable 6-21 OS=Homo sapiens OX=9606 GN=IGKV6-21 PE=3 SV=1
sp|P01766|HV313_HUMAN	1496000	2113000	1741000	3247000	2616000	2800000	1	1.41	1.16	2.17	1.75	1.87	Immunoglobulin heavy variable 3-13 OS=Homo sapiens OX=9606 GN=IGHV3-13 PE=1 SV=2
sp|P22792|CPN2_HUMAN	6879000	7434000	7312000	6688000	7663000	6354000	1	1.08	1.06	0.97	1.11	0.92	Carboxypeptidase N subunit 2 OS=Homo sapiens OX=9606 GN=CPN2 PE=1 SV=3
sp|P11166|GTR1_HUMAN	474800	480600	348000	672200	1073000	843900	1	1.01	0.73	1.42	2.26	1.78	Solute carrier family 2 facilitated glucose transporter member 1 OS=Homo sapiens OX=9606 GN=SLC2A1 PE=1 SV=2
A0A2U3TZL5|A0A2U3TZL5_HUMAN	1281000	1419000	1265000	1515000	1323000	1214000	1	1.11	0.99	1.18	1.03	0.95	CD59 glycoprotein (Fragment) OS=Homo sapiens OX=9606 GN=CD59 PE=1 SV=1
sp|P13987|CD59_HUMAN	1281000	1419000	1265000	1515000	1323000	1214000	1	1.11	0.99	1.18	1.03	0.95	CD59 glycoprotein OS=Homo sapiens OX=9606 GN=CD59 PE=1 SV=1
E9PNW4|E9PNW4_HUMAN	1281000	1419000	1265000	1515000	1323000	1214000	1	1.11	0.99	1.18	1.03	0.95	CD59 glycoprotein OS=Homo sapiens OX=9606 PE=1 SV=1
sp|P24593|IBP5_HUMAN	1612000	1621000	1408000	1912000	1641000	1817000	1	1.01	0.87	1.19	1.02	1.13	Insulin-like growth factor-binding protein 5 OS=Homo sapiens OX=9606 GN=IGFBP5 PE=1 SV=1
sp|P04075|ALDOA_HUMAN	1473000	2100000	1395000	1526000	1801000	1491000	1	1.43	0.95	1.04	1.22	1.01	Fructose-bisphosphate aldolase A OS=Homo sapiens OX=9606 GN=ALDOA PE=1 SV=2
J3KPS3|J3KPS3_HUMAN	1473000	2100000	1395000	1526000	1801000	1491000	1	1.43	0.95	1.04	1.22	1.01	Fructose-bisphosphate aldolase OS=Homo sapiens OX=9606 GN=ALDOA PE=1 SV=1
H3BPS8|H3BPS8_HUMAN	1473000	2100000	1395000	1526000	1801000	1491000	1	1.43	0.95	1.04	1.22	1.01	Fructose-bisphosphate aldolase (Fragment) OS=Homo sapiens OX=9606 GN=ALDOA PE=1 SV=1
H3BQN4|H3BQN4_HUMAN	1473000	2100000	1395000	1526000	1801000	1491000	1	1.43	0.95	1.04	1.22	1.01	Fructose-bisphosphate aldolase OS=Homo sapiens OX=9606 GN=ALDOA PE=1 SV=1
sp|P01718|LV327_HUMAN	7269000	9779000	4892000	4920000	5872000	8820000	1	1.35	0.67	0.68	0.81	1.21	Immunoglobulin lambda variable 3-27 OS=Homo sapiens OX=9606 GN=IGLV3-27 PE=1 SV=2
sp|P54108|CRIS3_HUMAN	5292000	4599000	5137000	5584000	4033000	5409000	1	0.87	0.97	1.06	0.76	1.02	Cysteine-rich secretory protein 3 OS=Homo sapiens OX=9606 GN=CRISP3 PE=1 SV=1
J3KPA1|J3KPA1_HUMAN	5292000	4599000	5137000	5584000	4033000	5409000	1	0.87	0.97	1.06	0.76	1.02	Cysteine-rich secretory protein 3 OS=Homo sapiens OX=9606 GN=CRISP3 PE=1 SV=1
sp|A0A0C4DH72|KV106_HUMAN	25730000	37770000	25270000	30540000	31610000	43170000	1	1.47	0.98	1.19	1.23	1.68	Immunoglobulin kappa variable 1-6 OS=Homo sapiens OX=9606 GN=IGKV1-6 PE=3 SV=1
sp|P01599|KV117_HUMAN	25730000	37770000	25270000	30540000	31610000	43170000	1	1.47	0.98	1.19	1.23	1.68	Immunoglobulin kappa variable 1-17 OS=Homo sapiens OX=9606 GN=IGKV1-17 PE=1 SV=2
sp|Q8WWA0|ITLN1_HUMAN	4205000	3286000	3988000	2603000	3097000	3305000	1	0.78	0.95	0.62	0.74	0.79	Intelectin-1 OS=Homo sapiens OX=9606 GN=ITLN1 PE=1 SV=1
sp|Q5D862|FILA2_HUMAN	811600	999400	754000	662000	1146000	1076000	1	1.23	0.93	0.82	1.41	1.33	Filaggrin-2 OS=Homo sapiens OX=9606 GN=FLG2 PE=1 SV=1
sp|A0A075B6K5|LV39_HUMAN	9336000	11840000	6690000	5840000	8841000	6627000	1	1.27	0.72	0.63	0.95	0.71	Immunoglobulin lambda variable 3-9 OS=Homo sapiens OX=9606 GN=IGLV3-9 PE=3 SV=1
sp|A0A0C4DH67|KV108_HUMAN	656800	684500	362000	574700	621500	499900	1	1.04	0.55	0.88	0.95	0.76	Immunoglobulin kappa variable 1-8 OS=Homo sapiens OX=9606 GN=IGKV1-8 PE=3 SV=1
sp|P00441|SODC_HUMAN	3975000	4738000	4148000	4143000	5660000	4759000	1	1.19	1.04	1.04	1.42	1.2	Superoxide dismutase [Cu-Zn] OS=Homo sapiens OX=9606 GN=SOD1 PE=1 SV=2
sp|P10720|PF4V_HUMAN	1092000	1384000	1064000	1263000	1532000	1574000	1	1.27	0.97	1.16	1.4	1.44	Platelet factor 4 variant OS=Homo sapiens OX=9606 GN=PF4V1 PE=1 SV=1
sp|P11597|CETP_HUMAN	2646000	4013000	3529000	2990000	3297000	3785000	1	1.52	1.33	1.13	1.25	1.43	Cholesteryl ester transfer protein OS=Homo sapiens OX=9606 GN=CETP PE=1 SV=2
I6L8B7|I6L8B7_HUMAN	677400	1109000	719000	907200	1652000	956100	1	1.64	1.06	1.34	2.44	1.41	Fatty acid-binding protein 5 OS=Homo sapiens OX=9606 GN=FABP5 PE=1 SV=1
sp|Q01469|FABP5_HUMAN	677400	1109000	719000	907200	1652000	956100	1	1.64	1.06	1.34	2.44	1.41	Fatty acid-binding protein 5 OS=Homo sapiens OX=9606 GN=FABP5 PE=1 SV=3
sp|A0A0C4DH38|HV551_HUMAN	62770000	86050000	93790000	88940000	60600000	80790000	1	1.37	1.49	1.42	0.97	1.29	Immunoglobulin heavy variable 5-51 OS=Homo sapiens OX=9606 GN=IGHV5-51 PE=3 SV=1
H9KV75|H9KV75_HUMAN	321200	401900	239700	210300	304600	349300	1	1.25	0.75	0.65	0.95	1.09	Alpha-actinin-1 OS=Homo sapiens OX=9606 GN=ACTN1 PE=1 SV=1
sp|P12814|ACTN1_HUMAN	321200	401900	239700	210300	304600	349300	1	1.25	0.75	0.65	0.95	1.09	Alpha-actinin-1 OS=Homo sapiens OX=9606 GN=ACTN1 PE=1 SV=2
H7C144|H7C144_HUMAN	321200	401900	239700	210300	304600	349300	1	1.25	0.75	0.65	0.95	1.09	Alpha-actinin-4 OS=Homo sapiens OX=9606 GN=ACTN4 PE=1 SV=2
F5GXS2|F5GXS2_HUMAN	321200	401900	239700	210300	304600	349300	1	1.25	0.75	0.65	0.95	1.09	Actinin alpha 4 isoform CRA_a OS=Homo sapiens OX=9606 GN=ACTN4 PE=1 SV=3
sp|O43707|ACTN4_HUMAN	321200	401900	239700	210300	304600	349300	1	1.25	0.75	0.65	0.95	1.09	Alpha-actinin-4 OS=Homo sapiens OX=9606 GN=ACTN4 PE=1 SV=2
sp|A0A0B4J1Y8|LV949_HUMAN	3900000	7187000	3613000	3481000	2771000	3971000	1	1.84	0.93	0.89	0.71	1.02	Immunoglobulin lambda variable 9-49 OS=Homo sapiens OX=9606 GN=IGLV9-49 PE=1 SV=1
sp|Q9Y5C1|ANGL3_HUMAN	1060000	1133000	1003000	1051000	1069000	1222000	1	1.07	0.95	0.99	1.01	1.15	Angiopoietin-related protein 3 OS=Homo sapiens OX=9606 GN=ANGPTL3 PE=1 SV=1
A0A075B7B6|A0A075B7B6_HUMAN	2283000	2225000	2620000	3141000	2503000	3540000	1	0.97	1.15	1.38	1.1	1.55	Immunoglobulin heavy variable 4/OR15-8 (non-functional) (Fragment) OS=Homo sapiens OX=9606 GN=IGHV4OR15-8 PE=4 SV=1
sp|P61026|RAB10_HUMAN	764700	1108000	824000	777700	1074000	1002000	1	1.45	1.08	1.02	1.4	1.31	Ras-related protein Rab-10 OS=Homo sapiens OX=9606 GN=RAB10 PE=1 SV=1
sp|A0A0C4DH32|HV320_HUMAN	938900	1134000	1022000	1122000	1554000	1228000	1	1.21	1.09	1.19	1.66	1.31	Immunoglobulin heavy variable 3-20 OS=Homo sapiens OX=9606 GN=IGHV3-20 PE=3 SV=2
sp|P01034|CYTC_HUMAN	1665000	2045000	1674000	2063000	2394000	2211000	1	1.23	1.01	1.24	1.44	1.33	Cystatin-C OS=Homo sapiens OX=9606 GN=CST3 PE=1 SV=1
sp|Q13093|PAFA_HUMAN	1178000	1585000	1376000	2638000	3078000	1737000	1	1.34	1.17	2.24	2.61	1.47	Platelet-activating factor acetylhydrolase OS=Homo sapiens OX=9606 GN=PLA2G7 PE=1 SV=1
sp|P01701|LV151_HUMAN	25100000	54470000	25220000	33570000	34190000	36810000	1	2.17	1	1.34	1.36	1.47	Immunoglobulin lambda variable 1-51 OS=Homo sapiens OX=9606 GN=IGLV1-51 PE=1 SV=2
sp|P01714|LV319_HUMAN	27410000	39420000	19670000	26330000	18680000	26470000	1	1.44	0.72	0.96	0.68	0.97	Immunoglobulin lambda variable 3-19 OS=Homo sapiens OX=9606 GN=IGLV3-19 PE=1 SV=2
sp|O75223|GGCT_HUMAN	2238000	1828000	1566000	1264000	2364000	1646000	1	0.82	0.7	0.57	1.06	0.74	Gamma-glutamylcyclotransferase OS=Homo sapiens OX=9606 GN=GGCT PE=1 SV=1
M0QZK8|M0QZK8_HUMAN	2238000	1828000	1566000	1264000	2364000	1646000	1	0.82	0.7	0.57	1.06	0.74	Gamma-glutamylcyclotransferase OS=Homo sapiens OX=9606 PE=4 SV=1
sp|Q14515|SPRL1_HUMAN	810900	795100	797400	669500	933400	1032000	1	0.98	0.98	0.83	1.15	1.27	SPARC-like protein 1 OS=Homo sapiens OX=9606 GN=SPARCL1 PE=1 SV=2
sp|Q13418|ILK_HUMAN	2031000	1892000	1479000	1076000	1430000	1420000	1	0.93	0.73	0.53	0.7	0.7	Integrin-linked protein kinase OS=Homo sapiens OX=9606 GN=ILK PE=1 SV=2
A0A0A0MTH3|A0A0A0MTH3_HUMAN	2031000	1892000	1479000	1076000	1430000	1420000	1	0.93	0.73	0.53	0.7	0.7	59 kDa serine/threonine-protein kinase OS=Homo sapiens OX=9606 GN=ILK PE=1 SV=1
A0A0A0MSI0|A0A0A0MSI0_HUMAN	333800	593100	281200	379900	732300	389000	1	1.78	0.84	1.14	2.19	1.17	Peroxiredoxin-1 (Fragment) OS=Homo sapiens OX=9606 GN=PRDX1 PE=1 SV=1
sp|Q06830|PRDX1_HUMAN	333800	593100	281200	379900	732300	389000	1	1.78	0.84	1.14	2.19	1.17	Peroxiredoxin-1 OS=Homo sapiens OX=9606 GN=PRDX1 PE=1 SV=1
A0A0A0MRQ5|A0A0A0MRQ5_HUMAN	333800	593100	281200	379900	732300	389000	1	1.78	0.84	1.14	2.19	1.17	Peroxiredoxin-1 OS=Homo sapiens OX=9606 GN=PRDX1 PE=1 SV=1
sp|Q15404|RSU1_HUMAN	1451000	1542000	1003000	865600	1499000	1262000	1	1.06	0.69	0.6	1.03	0.87	Ras suppressor protein 1 OS=Homo sapiens OX=9606 GN=RSU1 PE=1 SV=3
sp|A0A0C4DH35|HV335_HUMAN	1845000	1841000	1802000	1912000	2054000	1882000	1	1	0.98	1.04	1.11	1.02	Probable non-functional immunoglobulin heavy variable 3-35 OS=Homo sapiens OX=9606 GN=IGHV3-35 PE=1 SV=1
sp|P59666|DEF3_HUMAN	1772000	2148000	1417000	2052000	2939000	2375000	1	1.21	0.8	1.16	1.66	1.34	Neutrophil defensin 3 OS=Homo sapiens OX=9606 GN=DEFA3 PE=1 SV=1
sp|P59665|DEF1_HUMAN	1772000	2148000	1417000	2052000	2939000	2375000	1	1.21	0.8	1.16	1.66	1.34	Neutrophil defensin 1 OS=Homo sapiens OX=9606 GN=DEFA1B PE=1 SV=1
E7ENZ3|E7ENZ3_HUMAN	1459000	1769000	1168000	1379000	2725000	2106000	1	1.21	0.8	0.95	1.87	1.44	T-complex protein 1 subunit epsilon OS=Homo sapiens OX=9606 GN=CCT5 PE=1 SV=1
B7ZAR1|B7ZAR1_HUMAN	1459000	1769000	1168000	1379000	2725000	2106000	1	1.21	0.8	0.95	1.87	1.44	CCT-epsilon OS=Homo sapiens OX=9606 GN=CCT5 PE=1 SV=1
E9PCA1|E9PCA1_HUMAN	1459000	1769000	1168000	1379000	2725000	2106000	1	1.21	0.8	0.95	1.87	1.44	CCT-epsilon OS=Homo sapiens OX=9606 GN=CCT5 PE=1 SV=1
sp|P48643|TCPE_HUMAN	1459000	1769000	1168000	1379000	2725000	2106000	1	1.21	0.8	0.95	1.87	1.44	T-complex protein 1 subunit epsilon OS=Homo sapiens OX=9606 GN=CCT5 PE=1 SV=1
sp|P11047|LAMC1_HUMAN	660000	722900	710900	721800	1350000	850500	1	1.1	1.08	1.09	2.05	1.29	Laminin subunit gamma-1 OS=Homo sapiens OX=9606 GN=LAMC1 PE=1 SV=3
sp|P23468|PTPRD_HUMAN	355600	497100	404900	330600	426600	429300	1	1.4	1.14	0.93	1.2	1.21	Receptor-type tyrosine-protein phosphatase delta OS=Homo sapiens OX=9606 GN=PTPRD PE=1 SV=2
sp|P06312|KV401_HUMAN	7445000	9684000	8138000	9690000	9603000	9154000	1	1.3	1.09	1.3	1.29	1.23	Immunoglobulin kappa variable 4-1 OS=Homo sapiens OX=9606 GN=IGKV4-1 PE=1 SV=1
sp|A0A0A0MRZ8|KVD11_HUMAN	32510000	39970000	31220000	38310000	31630000	37930000	1	1.23	0.96	1.18	0.97	1.17	Immunoglobulin kappa variable 3D-11 OS=Homo sapiens OX=9606 GN=IGKV3D-11 PE=3 SV=6
sp|P04433|KV311_HUMAN	32510000	39970000	31220000	38310000	31630000	37930000	1	1.23	0.96	1.18	0.97	1.17	Immunoglobulin kappa variable 3-11 OS=Homo sapiens OX=9606 GN=IGKV3-11 PE=1 SV=1
sp|Q9UNW1|MINP1_HUMAN	1332000	1602000	1403000	1646000	1837000	1563000	1	1.2	1.05	1.24	1.38	1.17	Multiple inositol polyphosphate phosphatase 1 OS=Homo sapiens OX=9606 GN=MINPP1 PE=1 SV=1
sp|P16035|TIMP2_HUMAN	808400	719200	743400	964500	686400	839500	1	0.89	0.92	1.19	0.85	1.04	Metalloproteinase inhibitor 2 OS=Homo sapiens OX=9606 GN=TIMP2 PE=1 SV=2
B4DFW2|B4DFW2_HUMAN	808400	719200	743400	964500	686400	839500	1	0.89	0.92	1.19	0.85	1.04	Metalloproteinase inhibitor 2 OS=Homo sapiens OX=9606 GN=TIMP2 PE=1 SV=1
K7EIX4|K7EIX4_HUMAN	808400	719200	743400	964500	686400	839500	1	0.89	0.92	1.19	0.85	1.04	Metalloproteinase inhibitor 2 OS=Homo sapiens OX=9606 GN=TIMP2 PE=1 SV=1
sp|A0A075B6J9|LV218_HUMAN	2002000	2441000	1771000	2006000	2479000	2028000	1	1.22	0.88	1	1.24	1.01	Immunoglobulin lambda variable 2-18 OS=Homo sapiens OX=9606 GN=IGLV2-18 PE=3 SV=2
Q5VZR0|Q5VZR0_HUMAN	212500	161600	220900	250900	229900	175700	1	0.76	1.04	1.18	1.08	0.83	Golgi-associated plant pathogenesis-related protein 1 OS=Homo sapiens OX=9606 GN=GLIPR2 PE=1 SV=1
sp|Q9H4G4|GAPR1_HUMAN	212500	161600	220900	250900	229900	175700	1	0.76	1.04	1.18	1.08	0.83	Golgi-associated plant pathogenesis-related protein 1 OS=Homo sapiens OX=9606 GN=GLIPR2 PE=1 SV=3
sp|P19320|VCAM1_HUMAN	1594000	2099000	1573000	1606000	1689000	1615000	1	1.32	0.99	1.01	1.06	1.01	Vascular cell adhesion protein 1 OS=Homo sapiens OX=9606 GN=VCAM1 PE=1 SV=1
E9PDD2|E9PDD2_HUMAN	1594000	2099000	1573000	1606000	1689000	1615000	1	1.32	0.99	1.01	1.06	1.01	Vascular cell adhesion protein 1 OS=Homo sapiens OX=9606 GN=VCAM1 PE=1 SV=1
D6RGG3|D6RGG3_HUMAN	1311000	964300	841400	1061000	953600	1123000	1	0.74	0.64	0.81	0.73	0.86	Collagen alpha-1(XII) chain OS=Homo sapiens OX=9606 GN=COL12A1 PE=1 SV=1
sp|Q99715|COCA1_HUMAN	1311000	964300	841400	1061000	953600	1123000	1	0.74	0.64	0.81	0.73	0.86	Collagen alpha-1(XII) chain OS=Homo sapiens OX=9606 GN=COL12A1 PE=1 SV=2
E9PJ29|E9PJ29_HUMAN	29230000	38490000	34490000	16770000	43770000	84840000	1	1.32	1.18	0.57	1.5	2.9	Out at first protein homolog OS=Homo sapiens OX=9606 GN=OAF PE=1 SV=1
sp|Q86UD1|OAF_HUMAN	29230000	38490000	34490000	16770000	43770000	84840000	1	1.32	1.18	0.57	1.5	2.9	Out at first protein homolog OS=Homo sapiens OX=9606 GN=OAF PE=2 SV=1
sp|P05019|IGF1_HUMAN	739700	644800	879800	939600	825800	875800	1	0.87	1.19	1.27	1.12	1.18	Insulin-like growth factor I OS=Homo sapiens OX=9606 GN=IGF1 PE=1 SV=1
sp|P10124|SRGN_HUMAN	436500	776700	495200	422300	886400	548400	1	1.78	1.13	0.97	2.03	1.26	Serglycin OS=Homo sapiens OX=9606 GN=SRGN PE=1 SV=3
sp|P02786|TFR1_HUMAN	759900	822800	833200	747400	949300	684400	1	1.08	1.1	0.98	1.25	0.9	Transferrin receptor protein 1 OS=Homo sapiens OX=9606 GN=TFRC PE=1 SV=2
G3V0E5|G3V0E5_HUMAN	759900	822800	833200	747400	949300	684400	1	1.08	1.1	0.98	1.25	0.9	Transferrin receptor protein 1 OS=Homo sapiens OX=9606 GN=TFRC PE=1 SV=1
H0YLF3|H0YLF3_HUMAN	700300	1433000	895000	884200	1048000	1067000	1	2.05	1.28	1.26	1.5	1.52	Beta-2-microglobulin (Fragment) OS=Homo sapiens OX=9606 GN=B2M PE=1 SV=1
F5H6I0|F5H6I0_HUMAN	700300	1433000	895000	884200	1048000	1067000	1	2.05	1.28	1.26	1.5	1.52	Beta-2-microglobulin OS=Homo sapiens OX=9606 GN=B2M PE=1 SV=2
sp|P61769|B2MG_HUMAN	700300	1433000	895000	884200	1048000	1067000	1	2.05	1.28	1.26	1.5	1.52	Beta-2-microglobulin OS=Homo sapiens OX=9606 GN=B2M PE=1 SV=1
sp|Q9NPH3|IL1AP_HUMAN	1007000	974700	1091000	883000	1090000	959300	1	0.97	1.08	0.88	1.08	0.95	Interleukin-1 receptor accessory protein OS=Homo sapiens OX=9606 GN=IL1RAP PE=1 SV=2
sp|Q15063|POSTN_HUMAN	1928000	1946000	1946000	1677000	1886000	1930000	1	1.01	1.01	0.87	0.98	1	Periostin OS=Homo sapiens OX=9606 GN=POSTN PE=1 SV=2
sp|Q13332|PTPRS_HUMAN	83370	79010	128800	231200	149200	197600	1	0.95	1.55	2.77	1.79	2.37	Receptor-type tyrosine-protein phosphatase S OS=Homo sapiens OX=9606 GN=PTPRS PE=1 SV=3
sp|Q02818|NUCB1_HUMAN	977500	1039000	951900	863300	999500	779100	1	1.06	0.97	0.88	1.02	0.8	Nucleobindin-1 OS=Homo sapiens OX=9606 GN=NUCB1 PE=1 SV=4
Q5VVP7|Q5VVP7_HUMAN	1367000	2833000	1254000	1291000	7258000	1866000	1	2.07	0.92	0.94	5.31	1.37	C-reactive protein OS=Homo sapiens OX=9606 GN=CRP PE=1 SV=1
sp|P02741|CRP_HUMAN	1367000	2833000	1254000	1291000	7258000	1866000	1	2.07	0.92	0.94	5.31	1.37	C-reactive protein OS=Homo sapiens OX=9606 GN=CRP PE=1 SV=1
sp|A0A075B6H7|KV37_HUMAN	872100	912700	944600	841600	871500	1132000	1	1.05	1.08	0.97	1	1.3	Probable non-functional immunoglobulin kappa variable 3-7 OS=Homo sapiens OX=9606 GN=IGKV3-7 PE=1 SV=1
sp|P04746|AMYP_HUMAN	201900	246400	260300	202300	286400	278000	1	1.22	1.29	1	1.42	1.38	Pancreatic alpha-amylase OS=Homo sapiens OX=9606 GN=AMY2A PE=1 SV=2
sp|P0DTE8|AMY1C_HUMAN	201900	246400	260300	202300	286400	278000	1	1.22	1.29	1	1.42	1.38	Alpha-amylase 1C OS=Homo sapiens OX=9606 GN=AMY1C PE=1 SV=1
sp|P0DTE7|AMY1B_HUMAN	201900	246400	260300	202300	286400	278000	1	1.22	1.29	1	1.42	1.38	Alpha-amylase 1B OS=Homo sapiens OX=9606 GN=AMY1B PE=1 SV=1
sp|P0DUB6|AMY1A_HUMAN	201900	246400	260300	202300	286400	278000	1	1.22	1.29	1	1.42	1.38	Alpha-amylase 1A OS=Homo sapiens OX=9606 GN=AMY1A PE=1 SV=1
sp|P19961|AMY2B_HUMAN	201900	246400	260300	202300	286400	278000	1	1.22	1.29	1	1.42	1.38	Alpha-amylase 2B OS=Homo sapiens OX=9606 GN=AMY2B PE=1 SV=1
sp|Q3SY84|K2C71_HUMAN	227100	468000	378500	421700	420700	294300	1	2.06	1.67	1.86	1.85	1.3	Keratin type II cytoskeletal 71 OS=Homo sapiens OX=9606 GN=KRT71 PE=1 SV=3
C9JEE0|C9JEE0_HUMAN	221900	187500	212200	280200	322900	366200	1	0.85	0.96	1.26	1.46	1.65	Immunoglobulin lambda-like polypeptide 1 (Fragment) OS=Homo sapiens OX=9606 GN=IGLL1 PE=1 SV=1
E5RID5|E5RID5_HUMAN	850700	1124000	1027000	815700	1094000	910700	1	1.32	1.21	0.96	1.29	1.07	Carbonic anhydrase 2 OS=Homo sapiens OX=9606 GN=CA2 PE=1 SV=1
[truncated: 502 more rows]
